# Supplementary material
Source: PubMed Central journal article supplement (PMC4813688)

QAGSVGGFQWCGEPK 57.02200@C11,144.10207@K15,144.10207@Q1, 3+  
m= 1894.9245, matched intensity=69.1%, largest gap=1, sum gaps=1, gap at F8=0  
H20120525\_JQ\_CPTAC2\_Compref4\_protfxn05, scan:21325

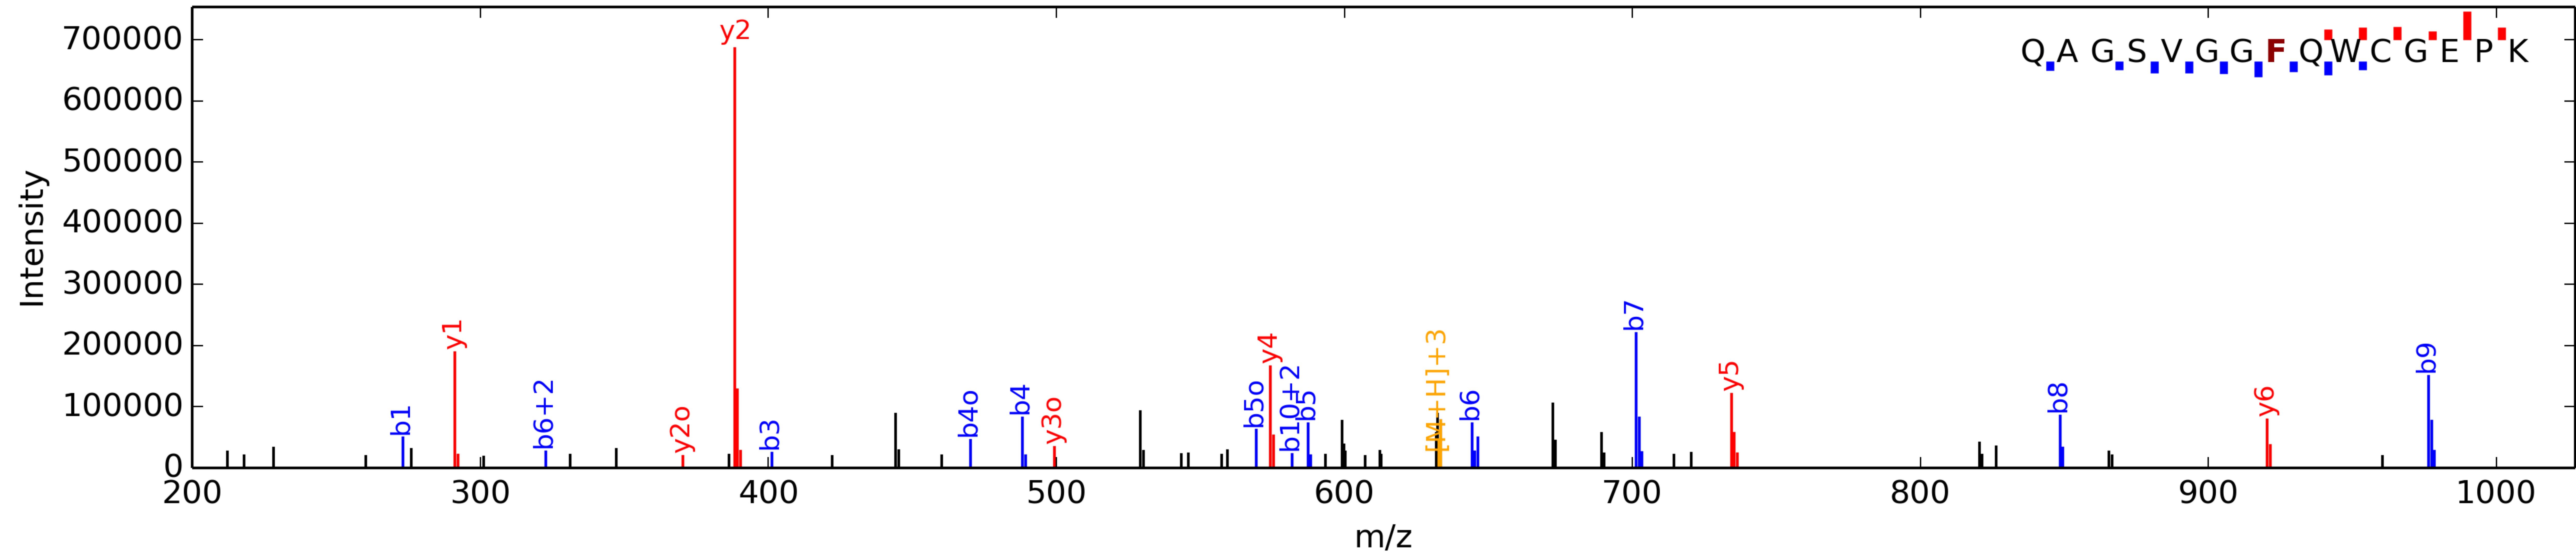

QAIDDDCNQTGQMTAGFLDWPQGTFASQVMLEGDK 57.02200@C7,144.10207@K35,144.10207@Q1, 3+  
m= 4161.8967, matched intensity=87.1%, largest gap=2, sum gaps=5, gap at M30=0  
H20130119\_PM\_CompRef\_BC1\_proteome\_fxn15, scan:41222

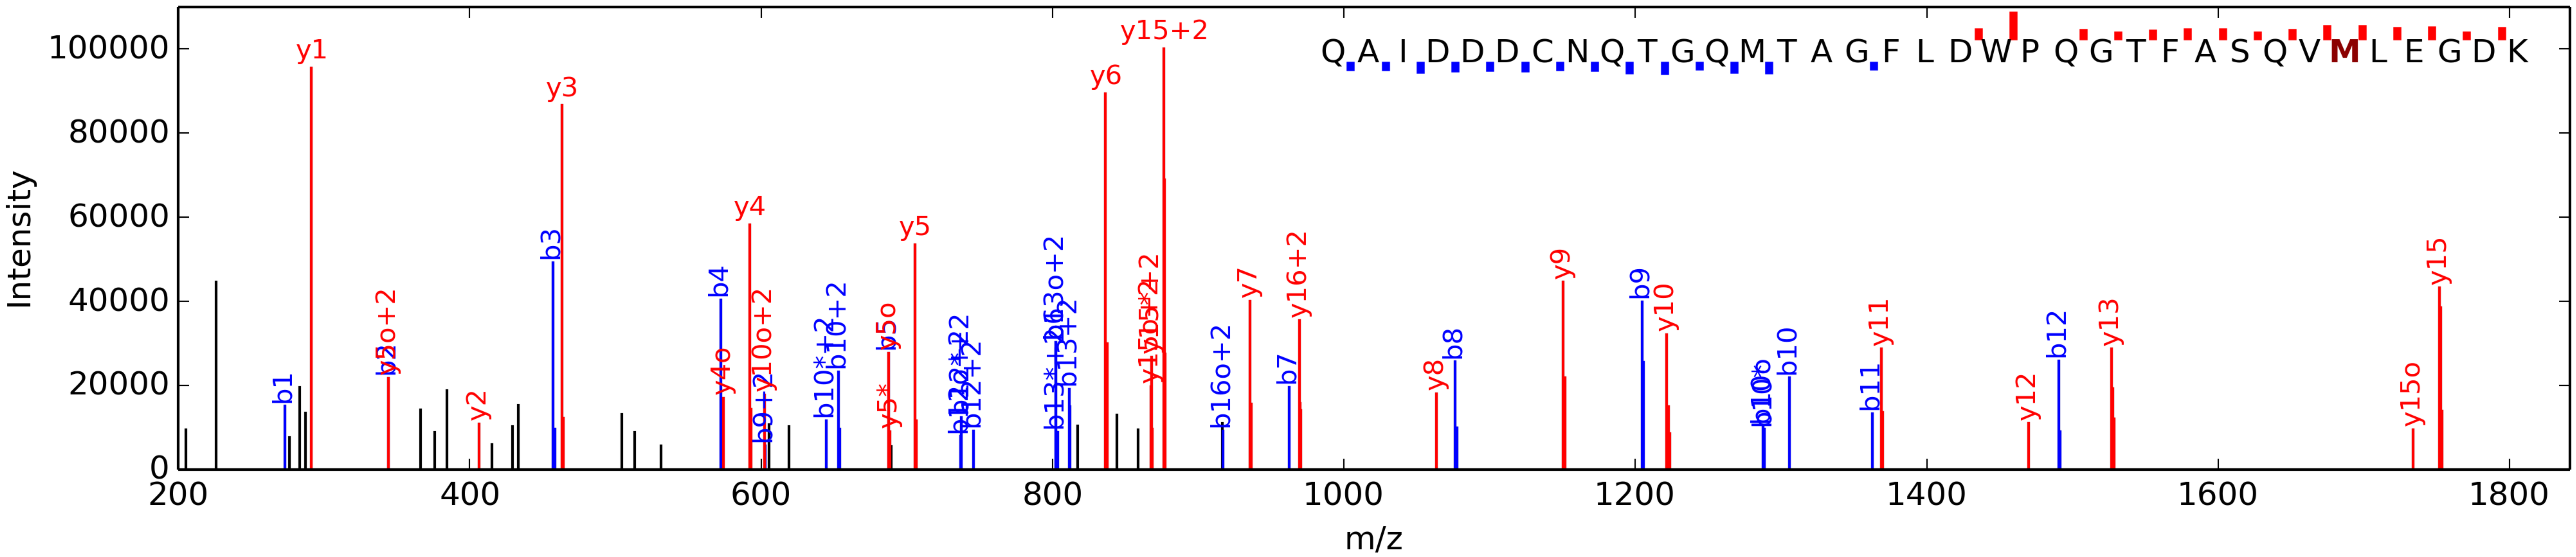



QATSDVQESTQESATVEK 144.10207@K18,144.10207@Q1, 3+  
 m= 2225.0903, matched intensity=81.2%, largest gap=0, sum gaps=0, gap at T15=0  
 CompRef\_2B\_P5-29\_P5-61\_P6-34\_P6-38\_W\_BI\_20130503\_H-JQ\_f06, scan:9211

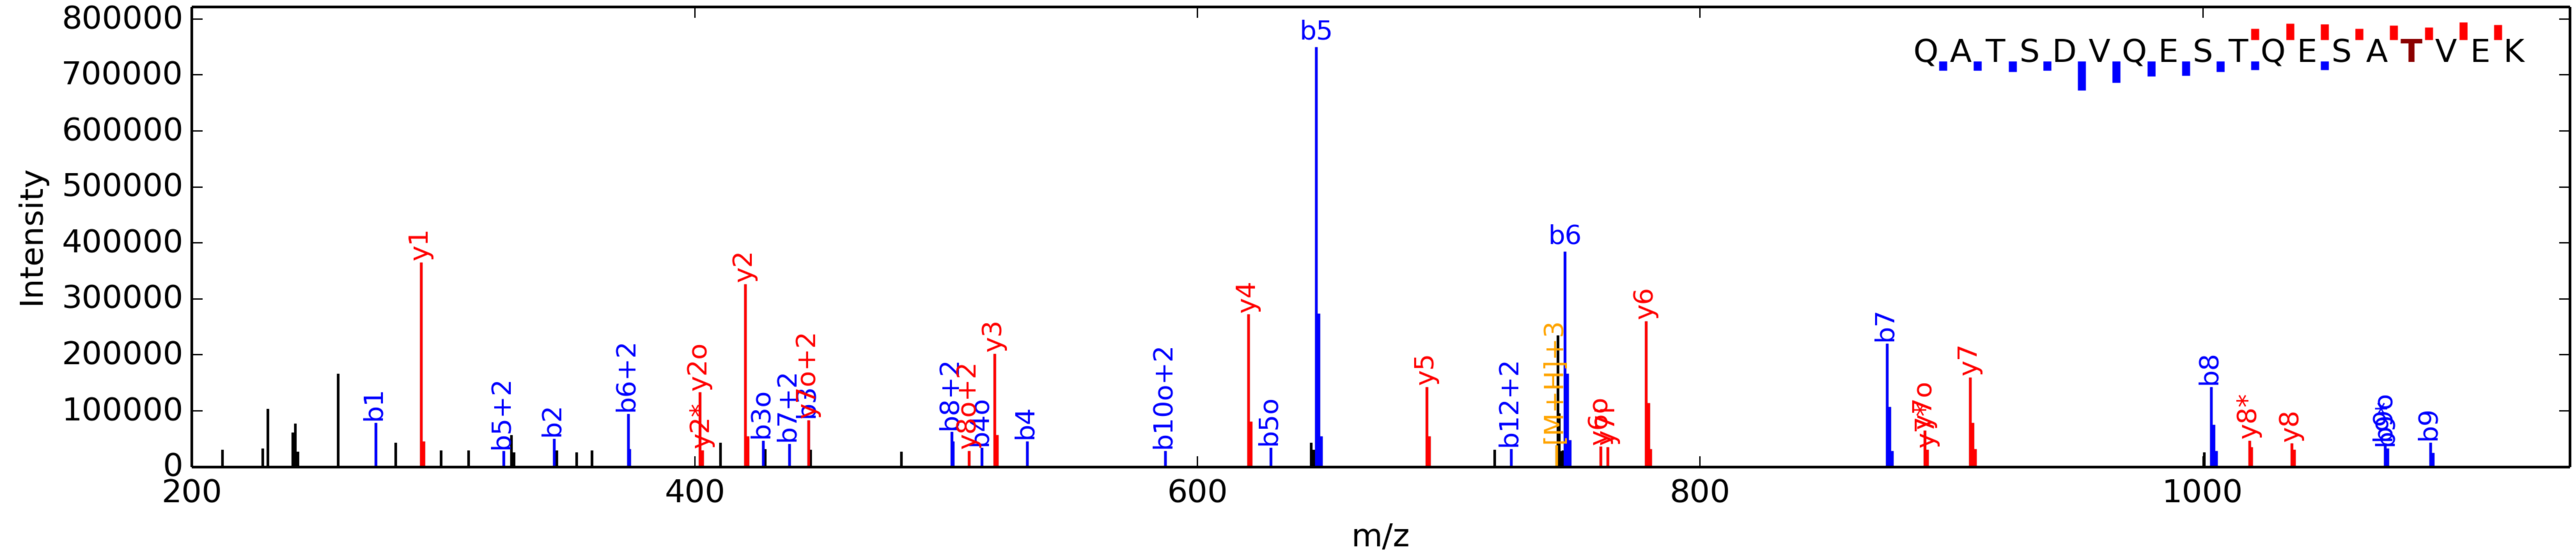

QDIQSDGFSIETCK 57.02200@C13,144.10207@K14,144.10207@Q1, 2+  
m= 1914.9242, matched intensity=84.9%, largest gap=0, sum gaps=0, gap at Q4=0  
H20120525\_JQ\_CPTAC2\_Compref4\_protfxn16, scan:18374

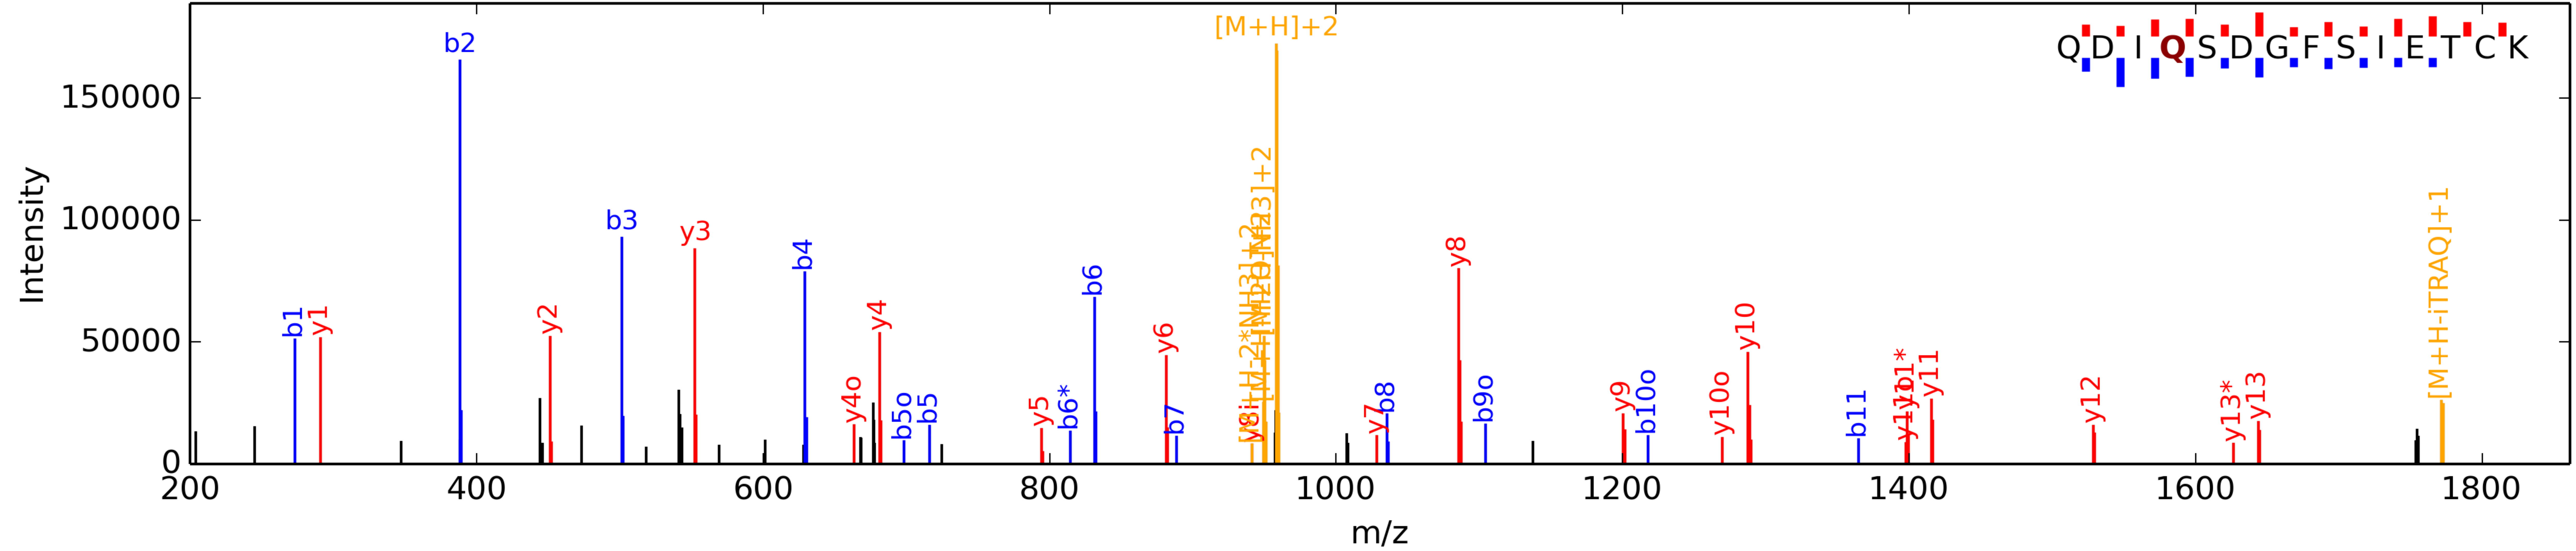



QDSDALPSPELLPQDQDKPFLR 144.10207@K18,144.10207@Q1,79.96633@S8, 3+  
m= 2876.4201, matched intensity=65.1%, largest gap=2, sum gaps=6, gap at Q16=1  
CPTAC\_CompREF\_00\_iTRAQ\_NiNTA\_03b\_26Mar12\_Lynx\_12-02-29, scan:23168

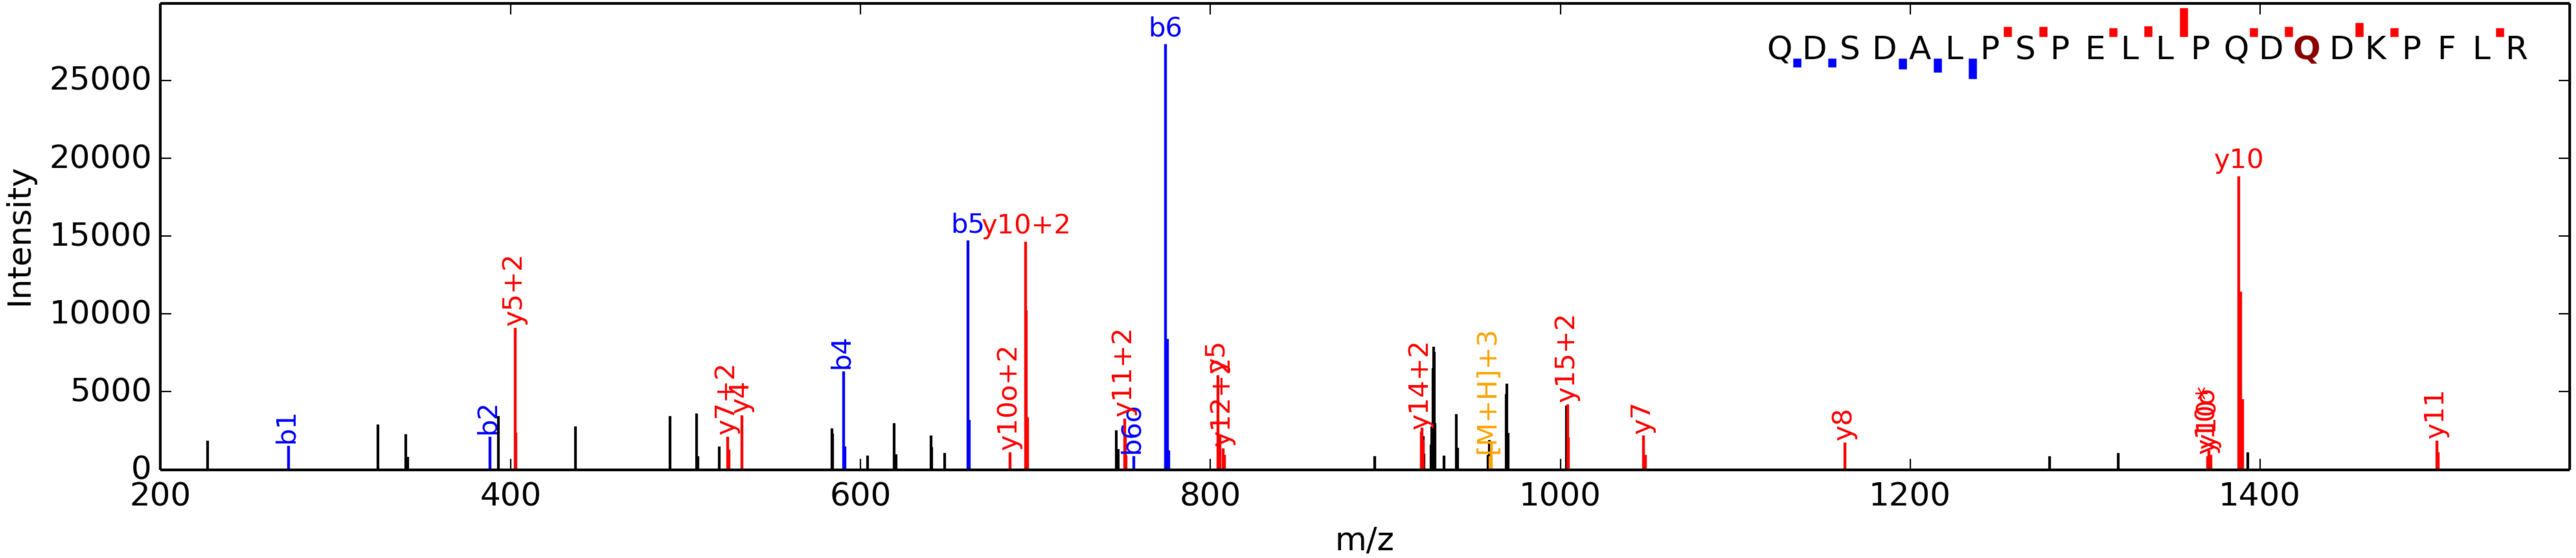

QEEDNTQSDDILEESDQPTQESK 144.10207@K23,144.10207@Q1, 3+  
 m= 2952.3200, matched intensity=82.3%, largest gap=0, sum gaps=0, gap at E21=0  
 CompRef\_P5-91\_P6-74\_P5-100\_P6-108\_W\_BI\_20131004\_fA, scan:14085

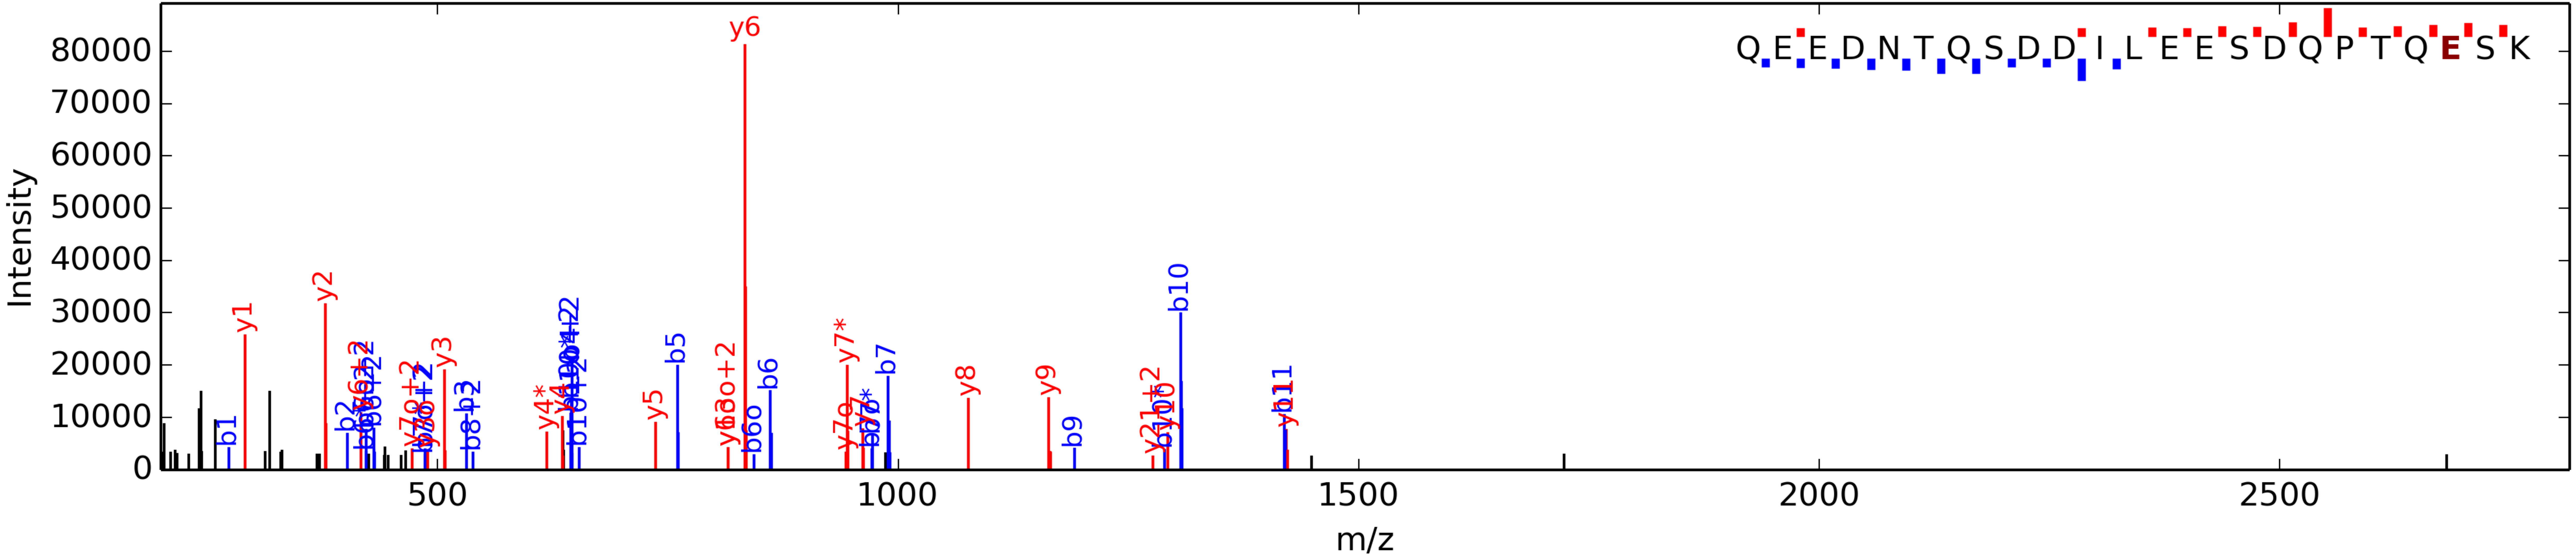





QEVWLANGAESWGLR 144.10207@Q1, 2+  
m= 1929.9819, matched intensity=68.4%, largest gap=1, sum gaps=3, gap at W13=1  
H20130119\_PM\_CompRef\_BC1\_proteome\_fxn18, scan:32049

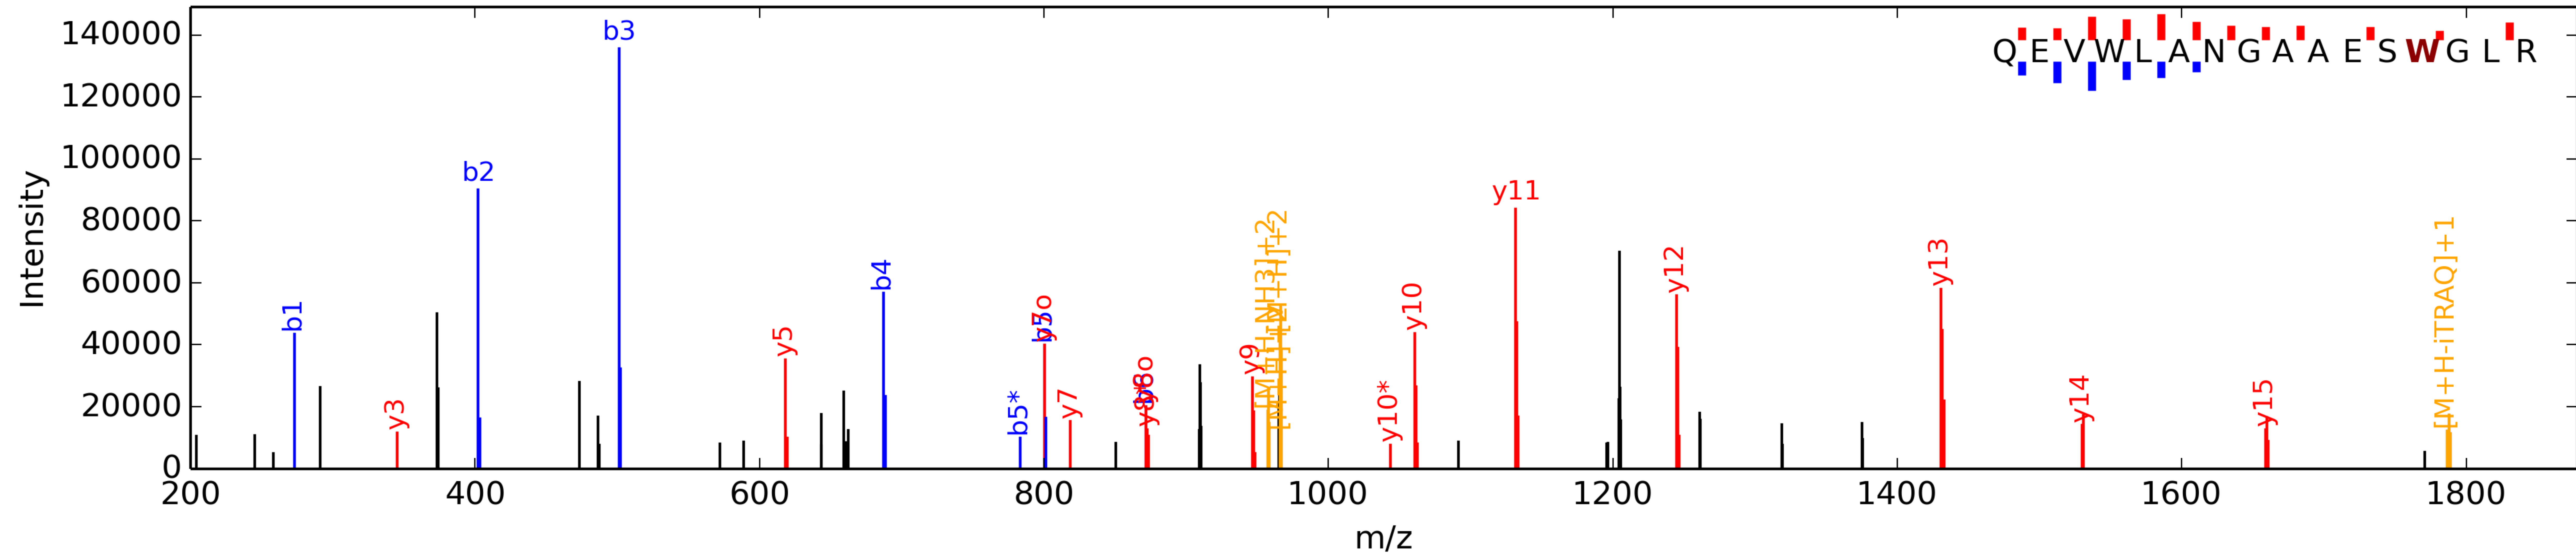

QGAACNVLFINSVDMESLTGPQAISK 57.02200@C5,144.10207@K26,144.10207@Q1, 3+  
m= 3037.5462, matched intensity=87.2%, largest gap=1, sum gaps=1, gap at I10=0  
CompRef\_2A\_P5-29\_P5-61\_P6-34\_P6-38\_W\_BI\_20130502\_H-JQ\_f22, scan:34758

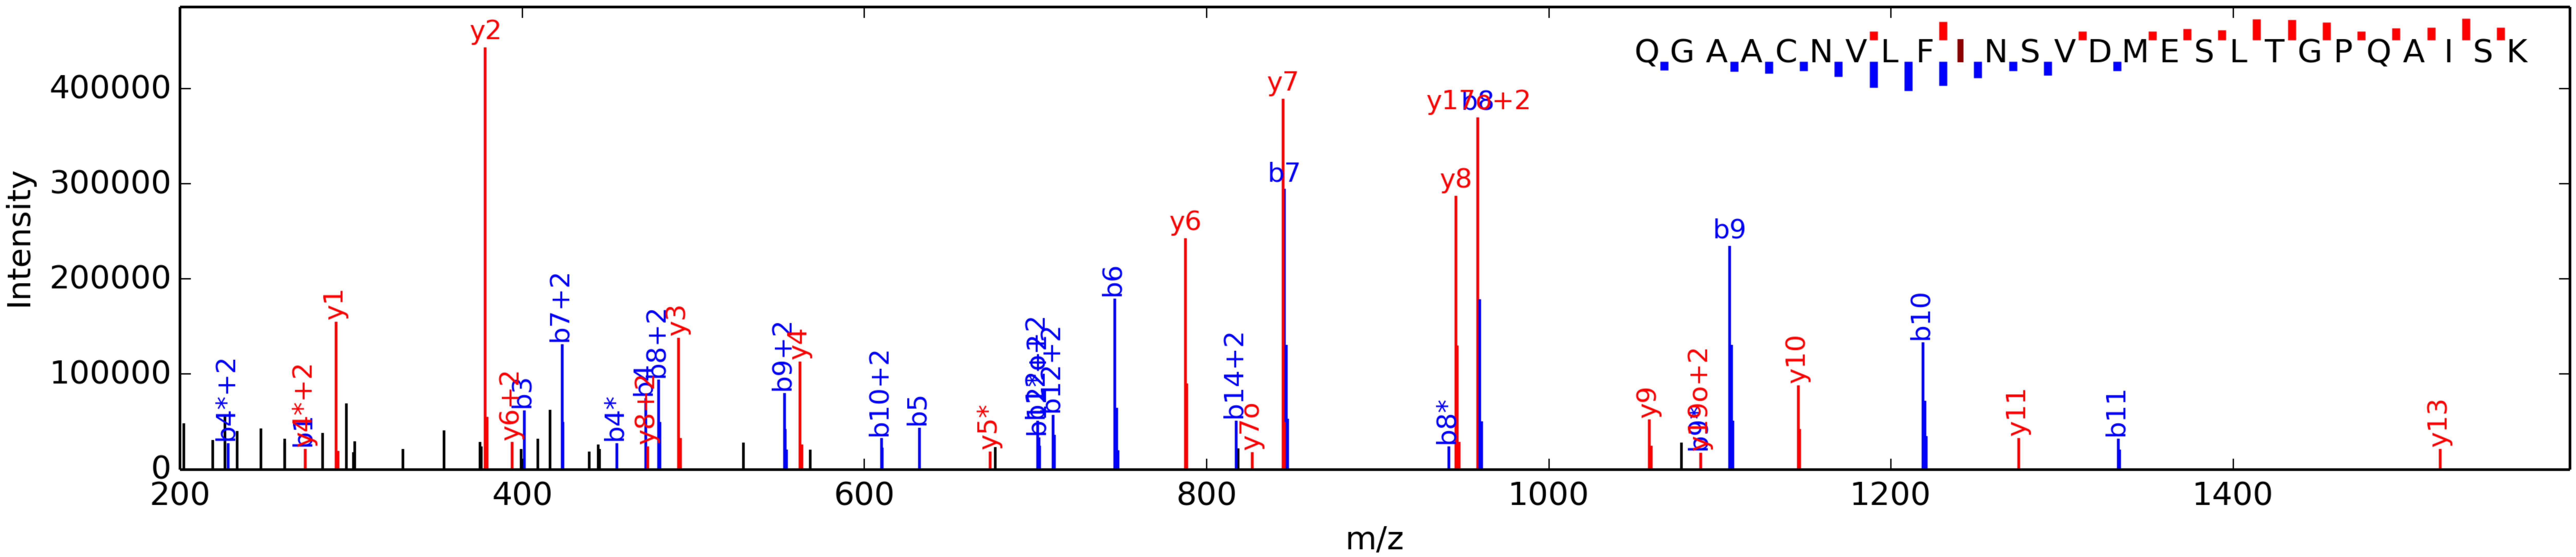





QIVGYVIGTQQATPGPANSR 144.10207@Q1, 3+  
m= 2257.1937, matched intensity=72.8%, largest gap=1, sum gaps=1, gap at V6=0  
G20120208\_PM\_CompRef1\_SCX\_proteome\_fxn03, scan:20085

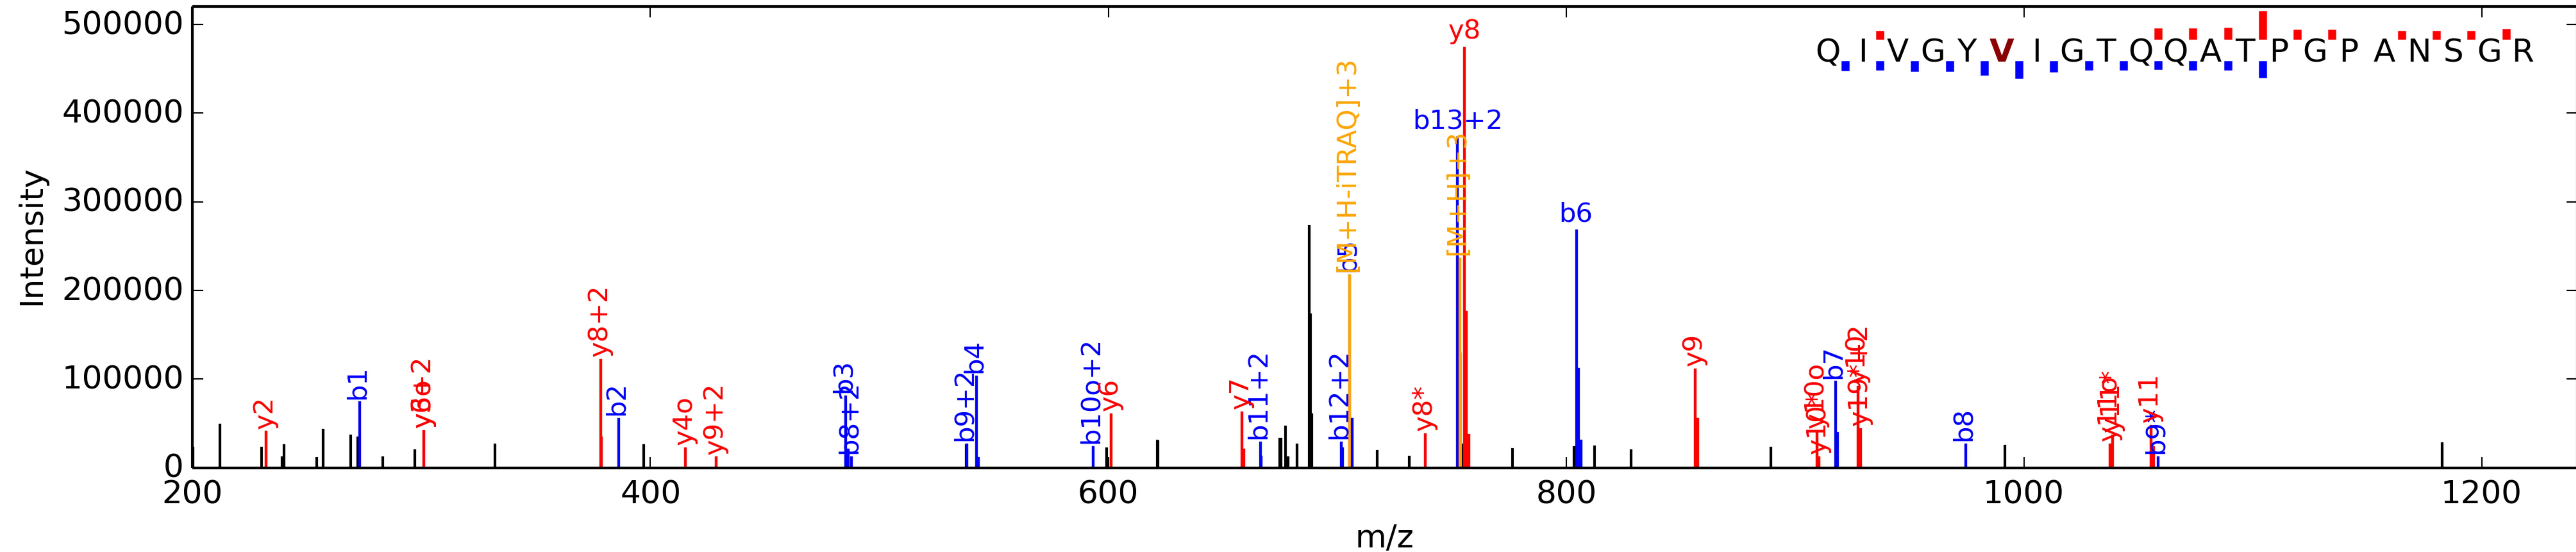

QLLNLWISDTISSSTEPSPK 144.10207@K19,144.10207@Q1, 3+  
m= 2416.3093, matched intensity=81.4%, largest gap=0, sum gaps=0, gap at l11=0  
H20120525\_JQ\_CPTAC2\_Compref4\_protfxn04, scan:35586

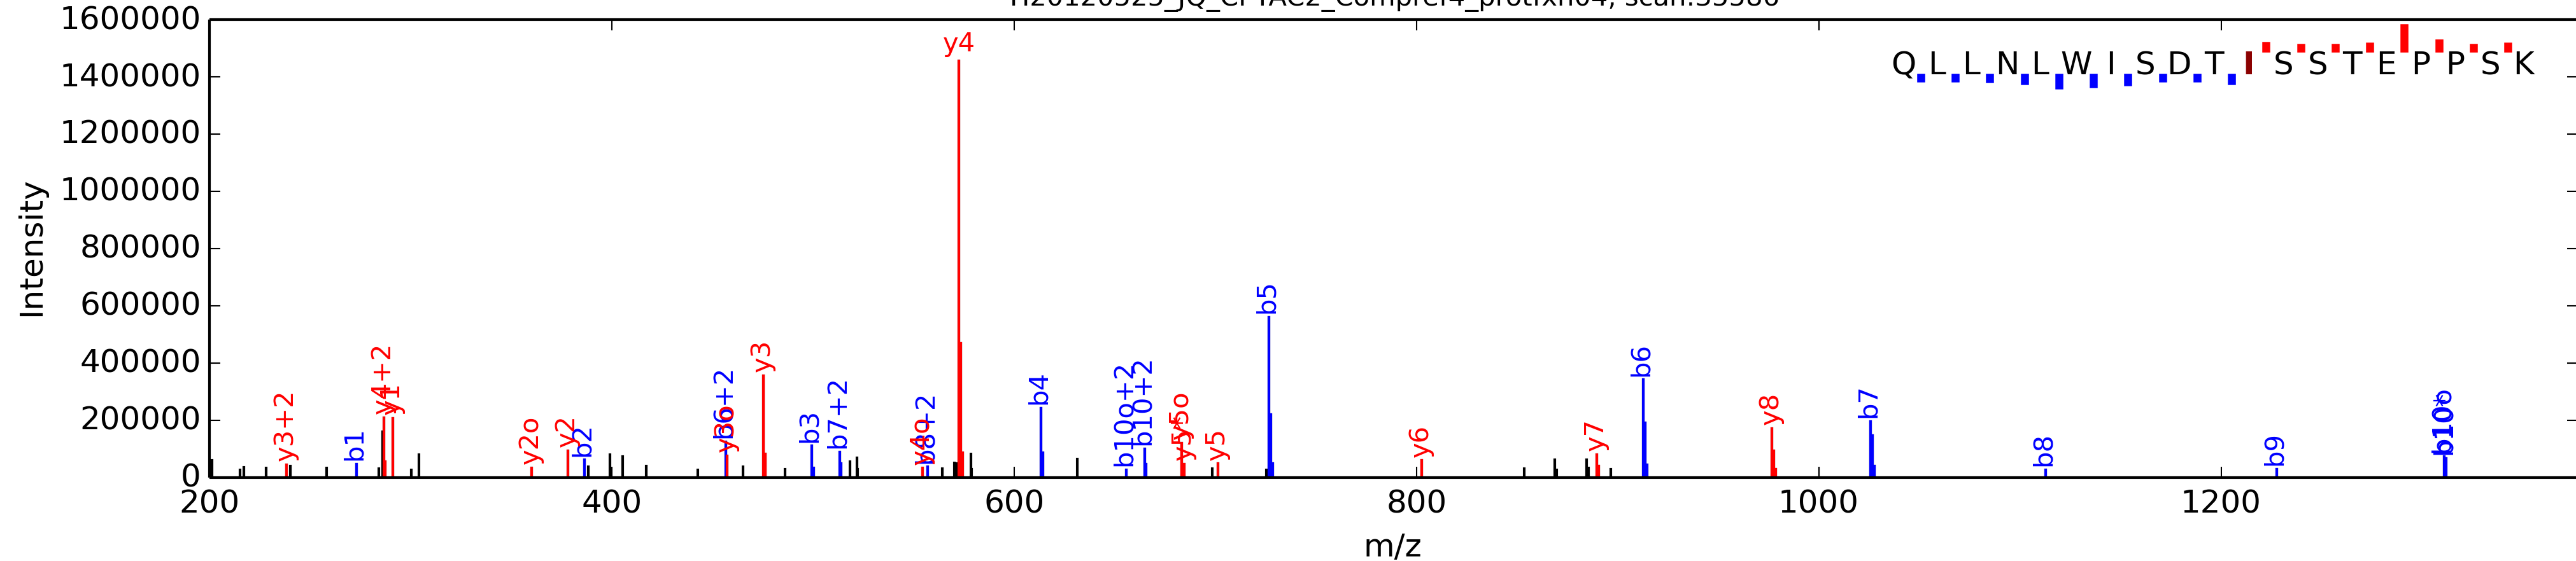



QLQEETPSGGPLTEALPPARK 144.10207@K21,144.10207@Q1, 3+  
 m= 2506.3635, matched intensity=86.6%, largest gap=2, sum gaps=3, gap at S8=1  
 CompRef\_2B\_P5-29\_P5-61\_P6-34\_P6-38\_W\_BI\_20130503\_H-JQ\_f01, scan:18537

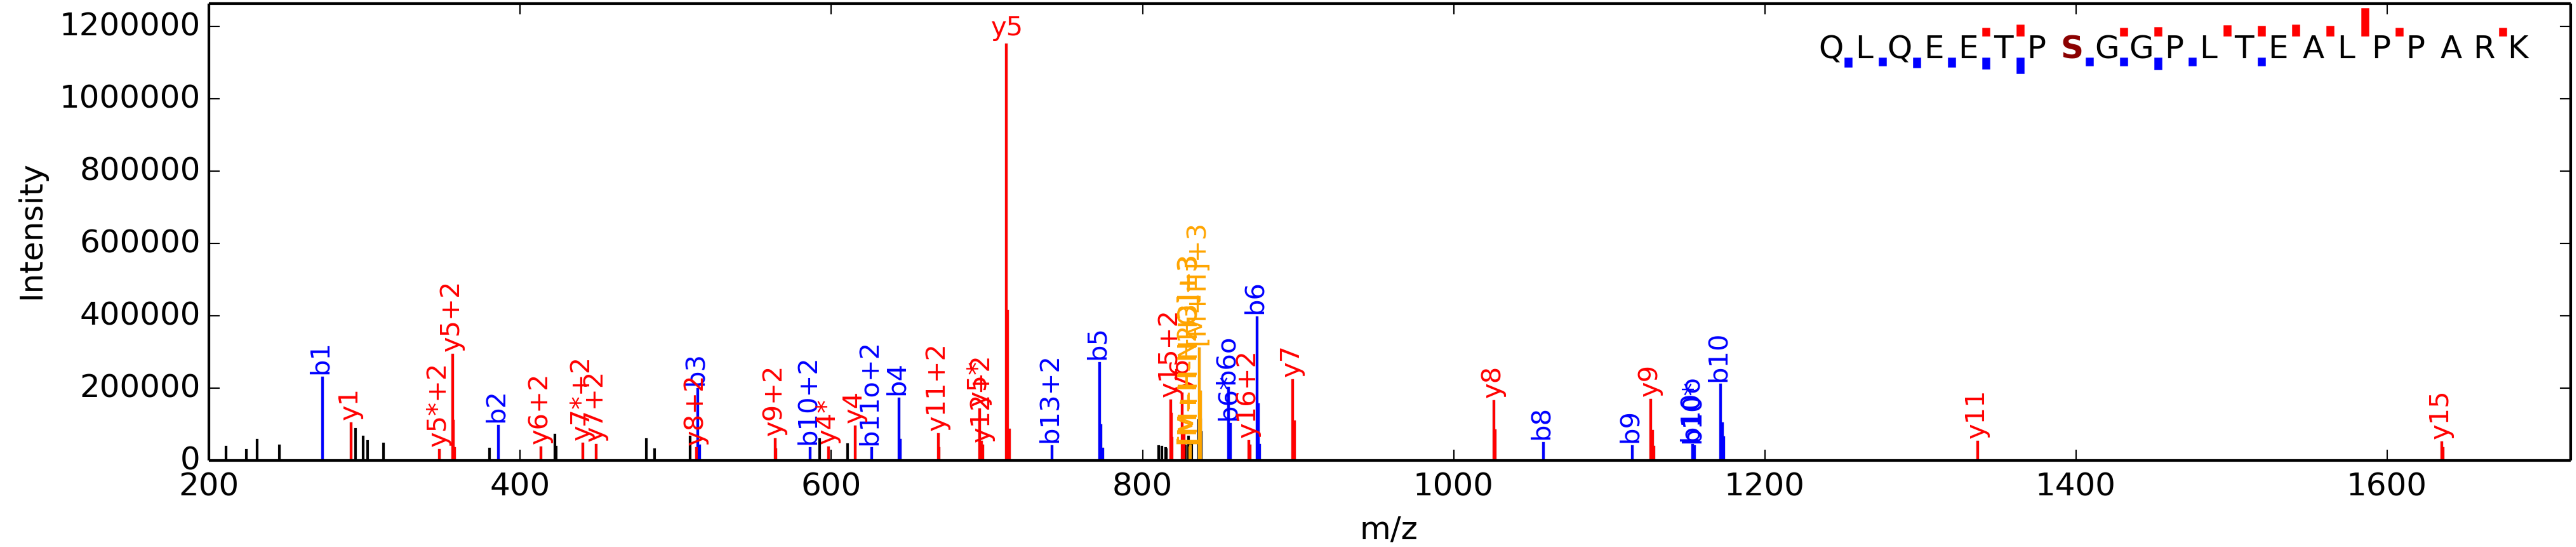



QQHEGAQGTLDSGEPPQCR 57.02200@C18,144.10207@Q1, 3+  
m= 2238.0211, matched intensity=87.6%, largest gap=1, sum gaps=1, gap at T9=0  
CPTAC\_CompRef\_00\_iTRAQ\_18\_2Feb12\_Cougar\_11-10-11, scan:2057

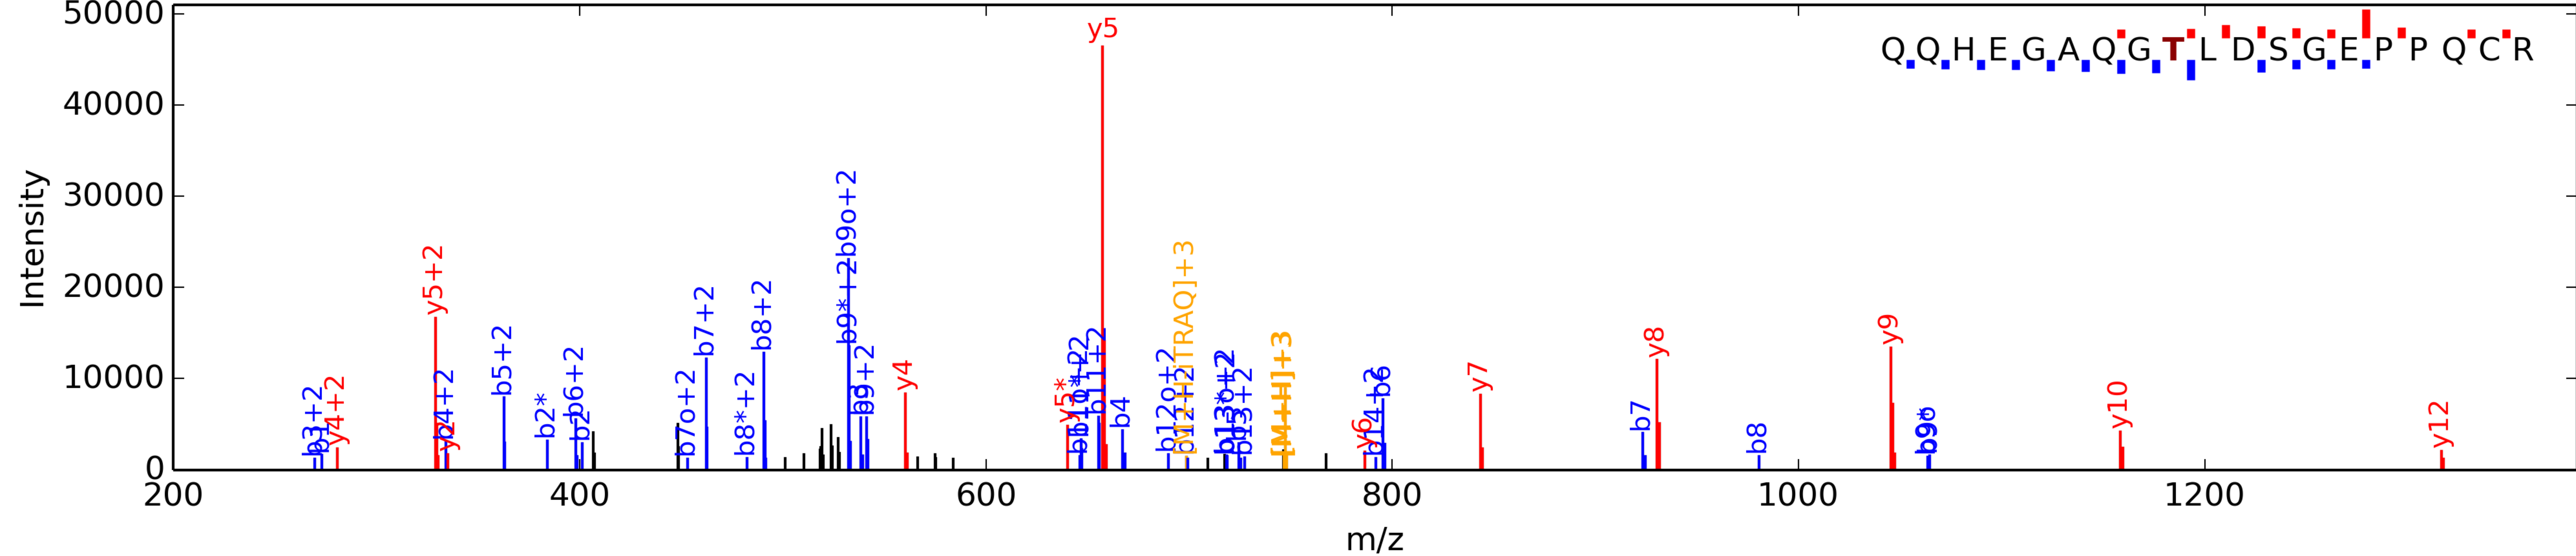

QQPNPGSELCYK 57.02200@C10,144.10207@K12,144.10207@Q1, 2+  
m= 1707.8499, matched intensity=51.2%, largest gap=0, sum gaps=0, gap at S7=0  
CPTAC\_CompRef\_00\_iTRAQ\_01\_2Feb12\_Cougar\_11-10-09, scan:5306

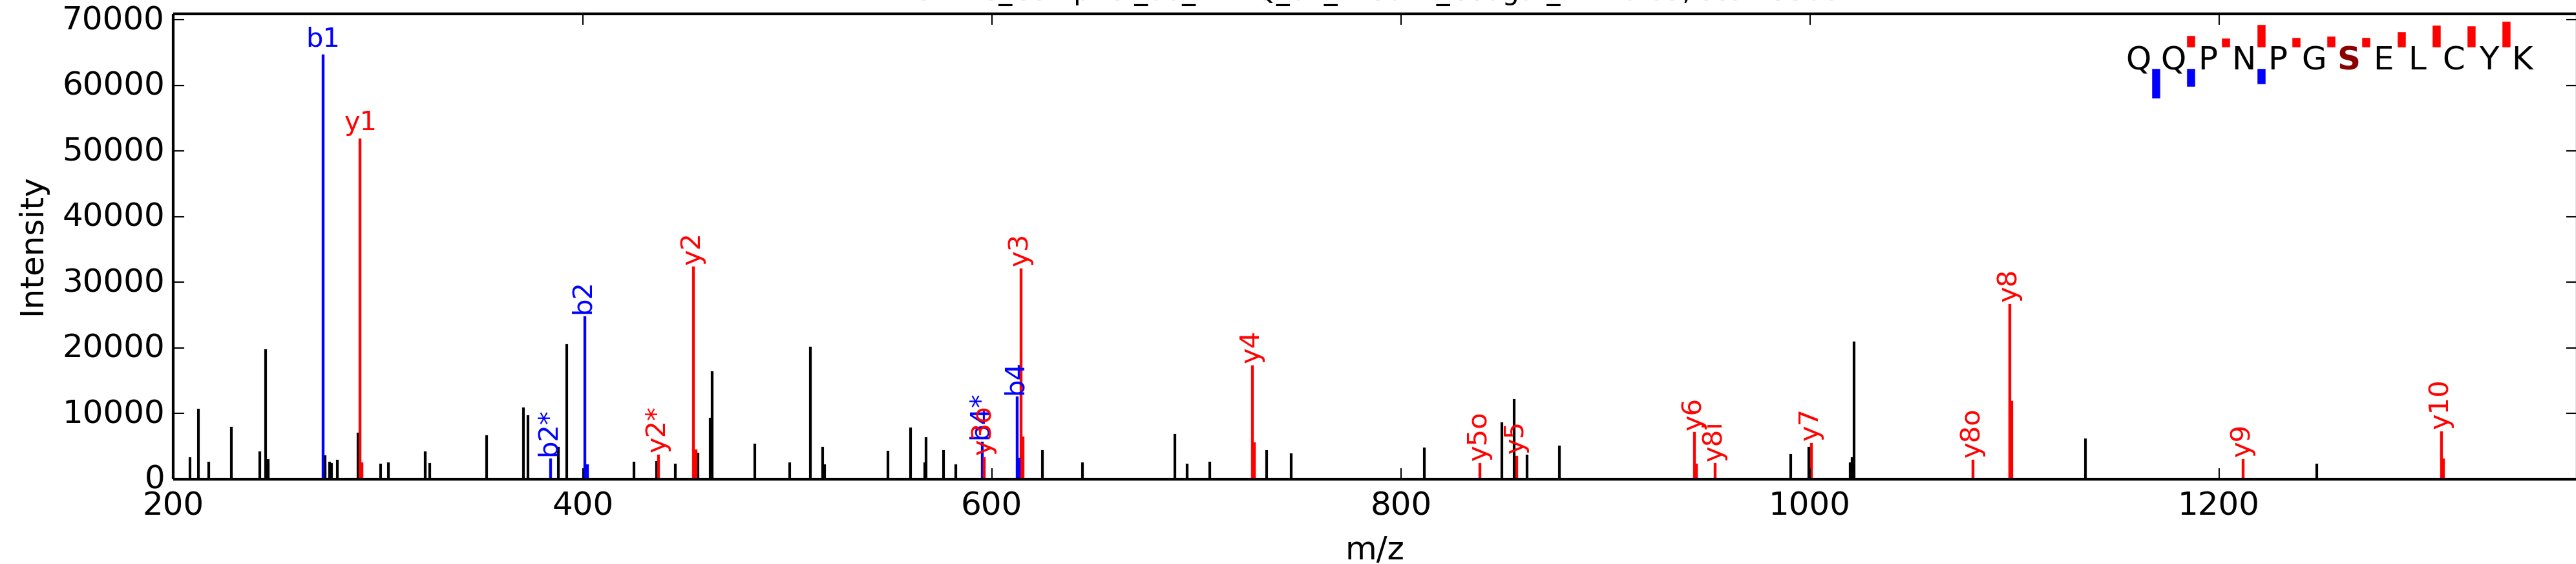

QQQAAVSNK 144.10207@K9,144.10207@Q1, 2+  
m= 1260.7030, matched intensity=70.8%, largest gap=0, sum gaps=0, gap at N8=0  
H20130119\_PM\_CompRef\_BC1\_proteome\_fxn10, scan:2872

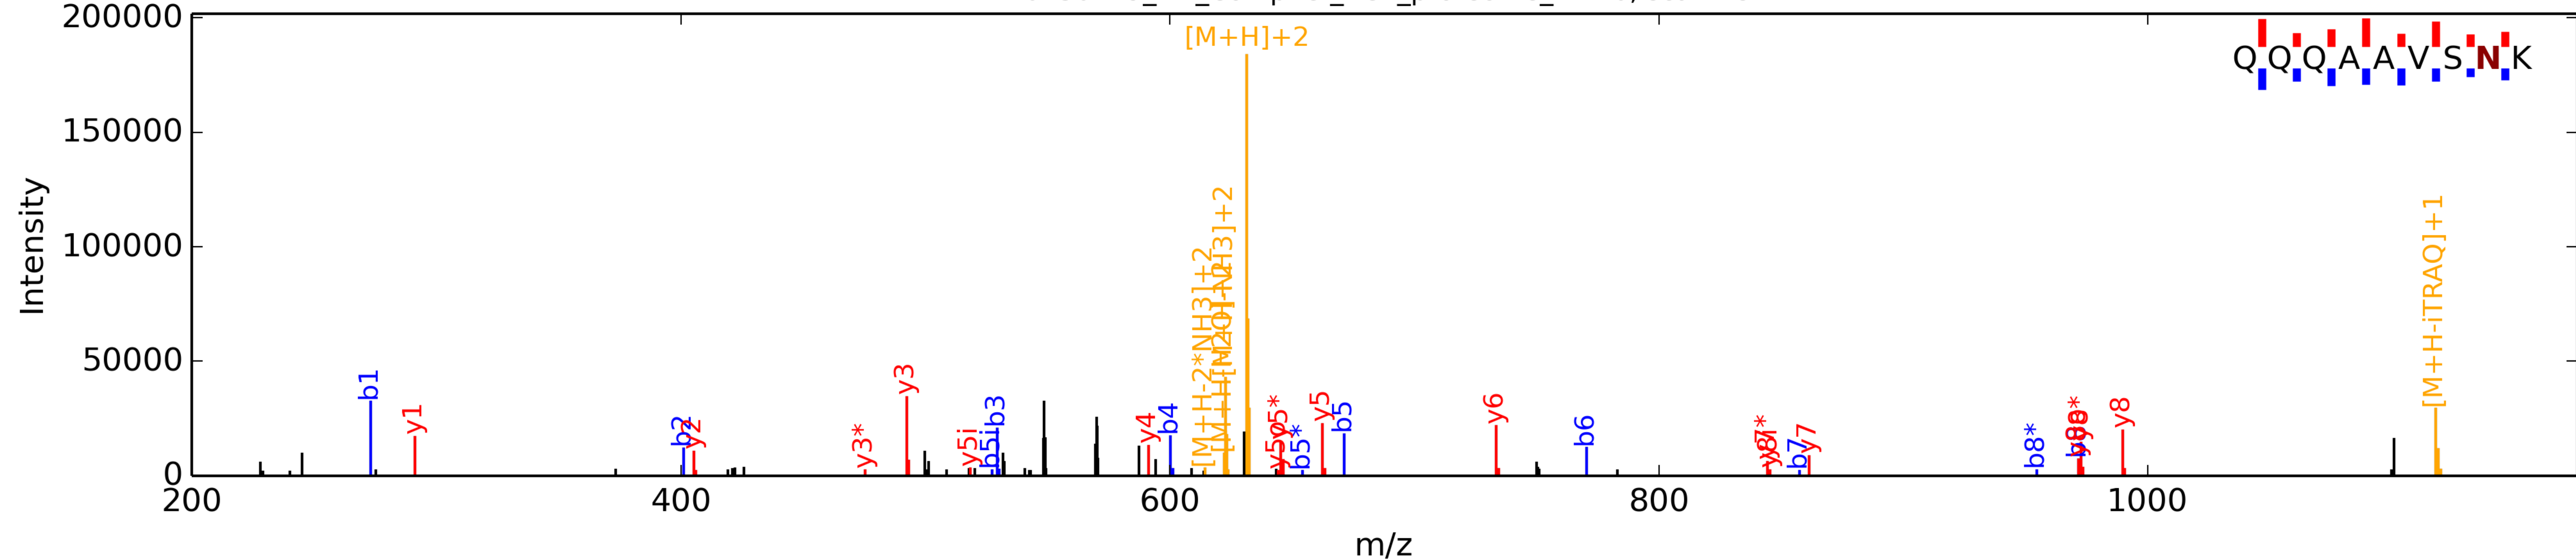



QQQDYWLMDVR 144.10207@Q1, 2+  
m= 1624.7790, matched intensity=68.1%, largest gap=0, sum gaps=0, gap at M8=0  
CPTAC\_CompRef\_test\_X\_iTRAQ\_22\_10Jan13\_Lynx\_12-11-08, scan:8506

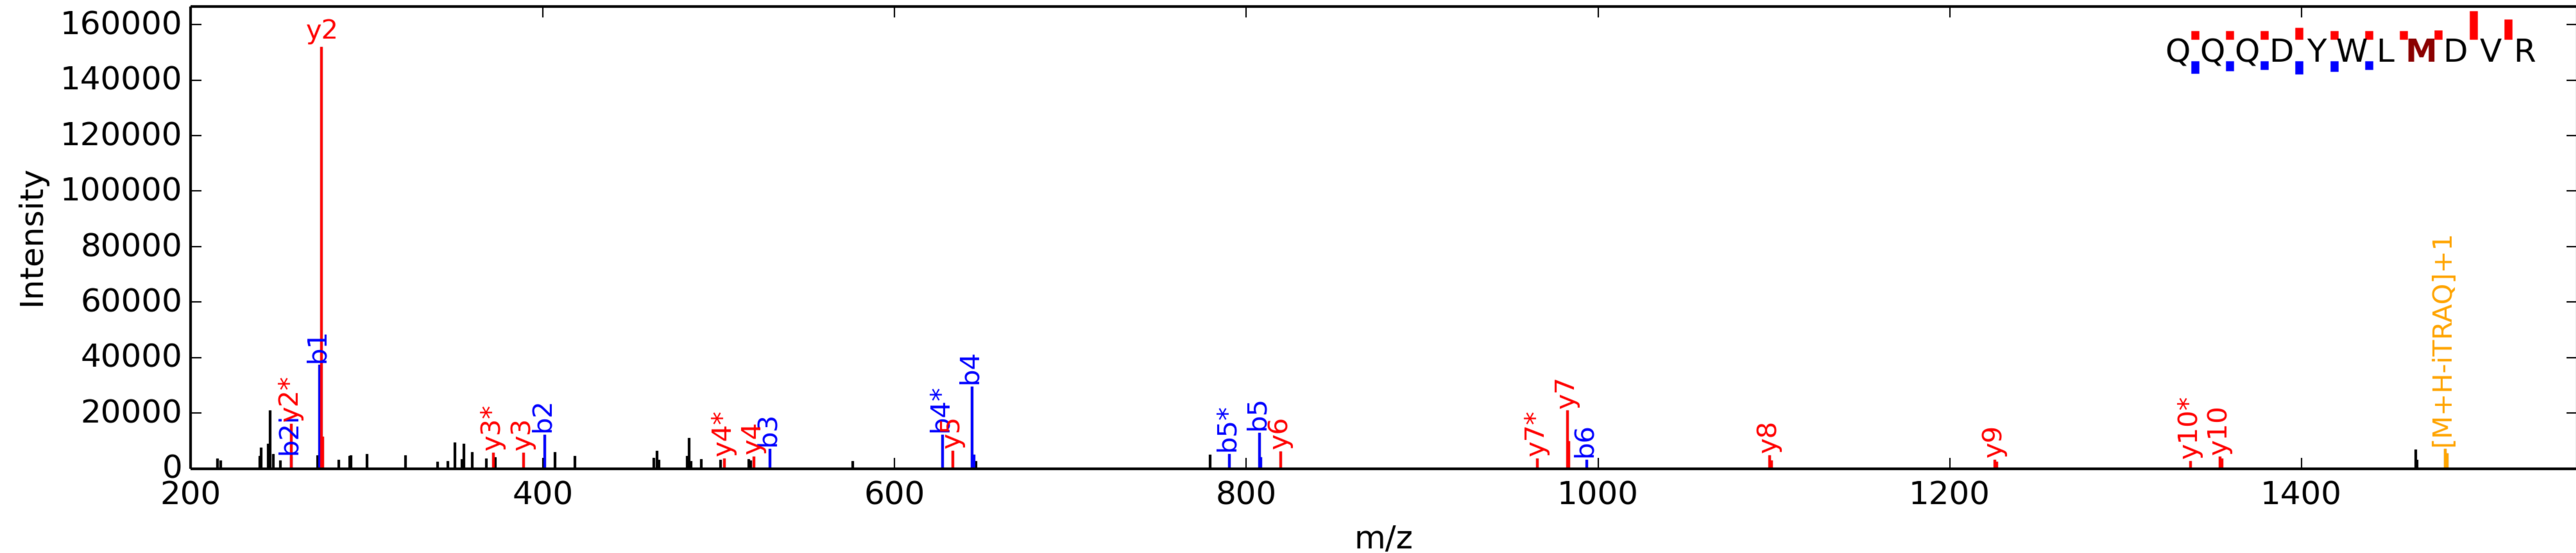

QRAQEALLQLSQALSLMETVK 144.10207@K21,144.10207@Q1, 3+  
 m= 2644.4826, matched intensity=89.3%, largest gap=2, sum gaps=2, gap at A13=0  
 CompRef\_P5-25\_P5-19\_P6-85\_P6-58\_W\_BI\_20130717\_f10, scan:40361

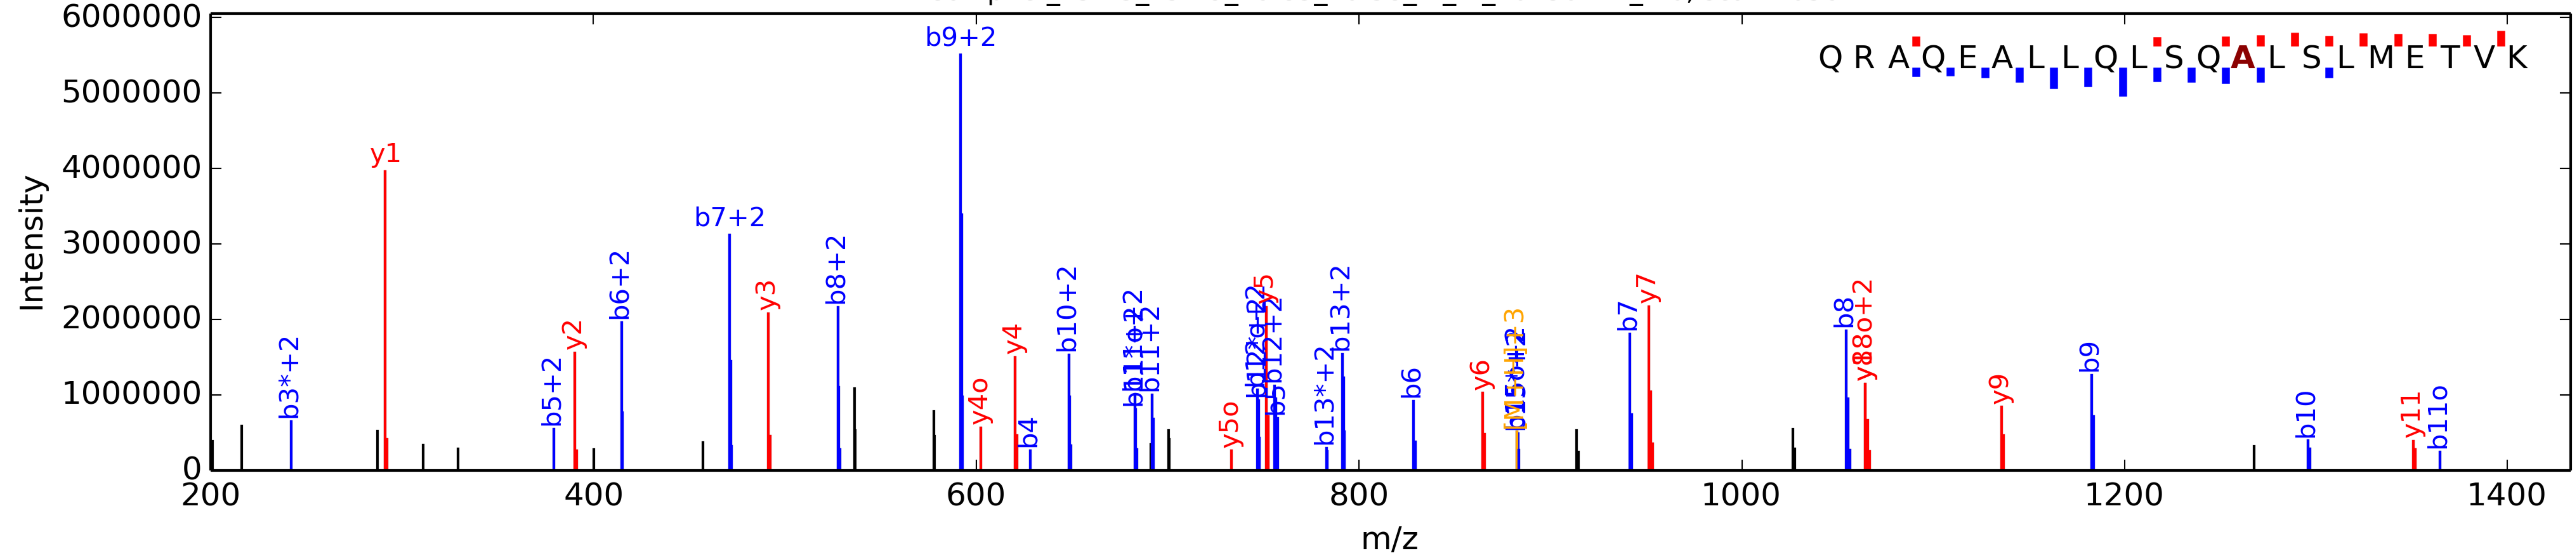



QSAE LDLVLQR 144.10207@Q1, 2+  
m= 1485.8273, matched intensity=56.8%, largest gap=0, sum gaps=0, gap at S2=0  
H20120525\_JQ\_CPTAC2\_Compref4\_protfxn01, scan:23441

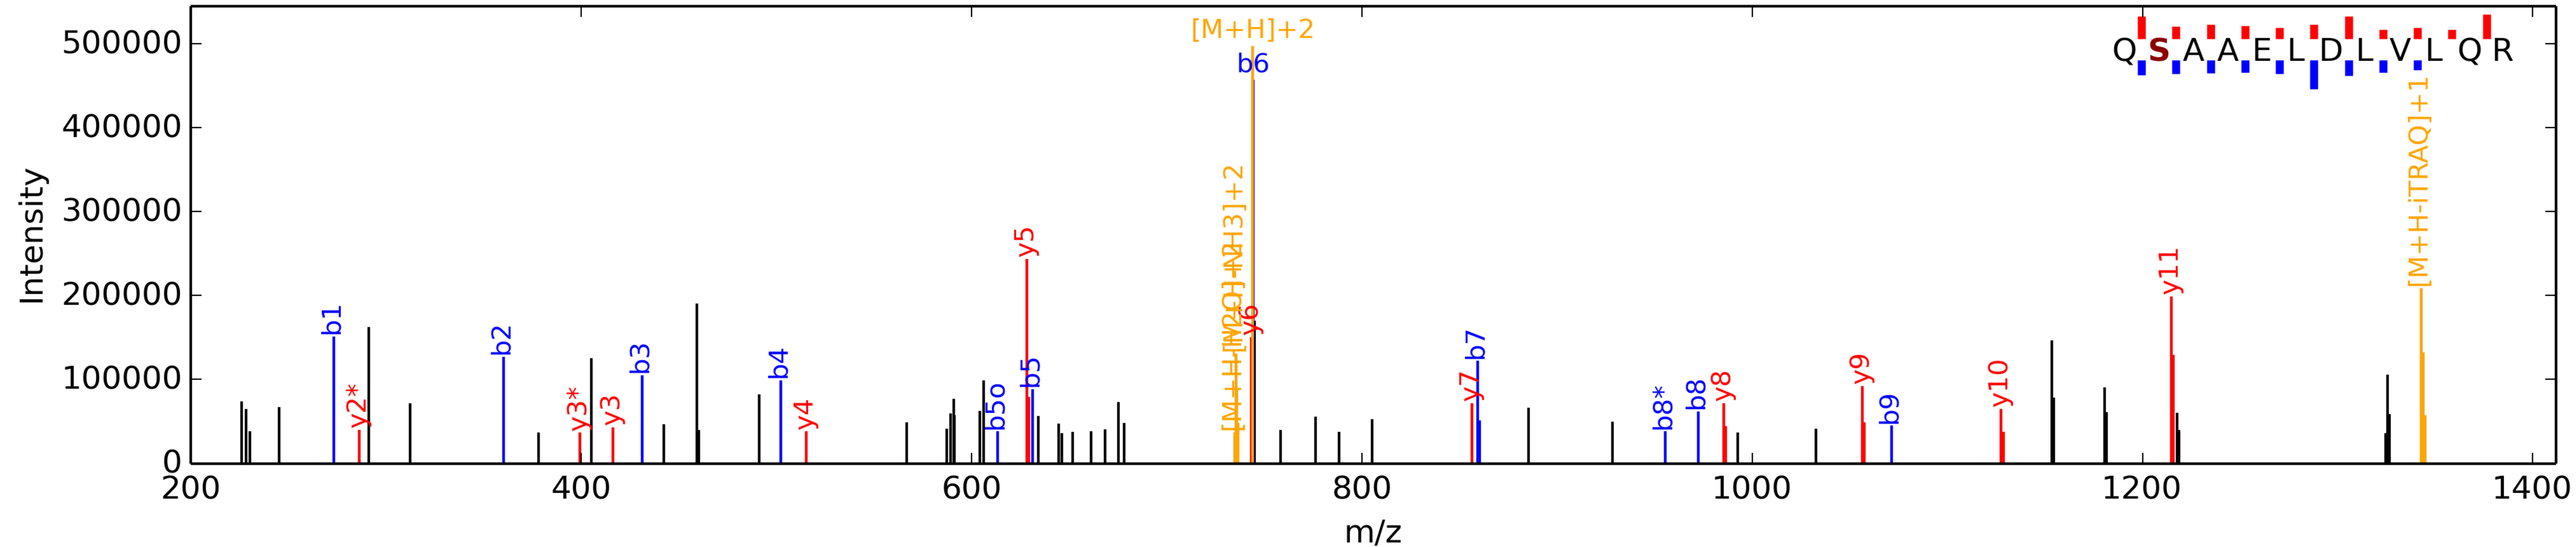

QSPGLANELLKEYLVT LAK 144.10207@K11,144.10207@K19,144.10207@Q1, 3+  
 m= 2518.4736, matched intensity=83.8%, largest gap=2, sum gaps=3, gap at L5=2  
 H20120525\_JQ\_CPTAC2\_Compref4\_protfxn06, scan:36071

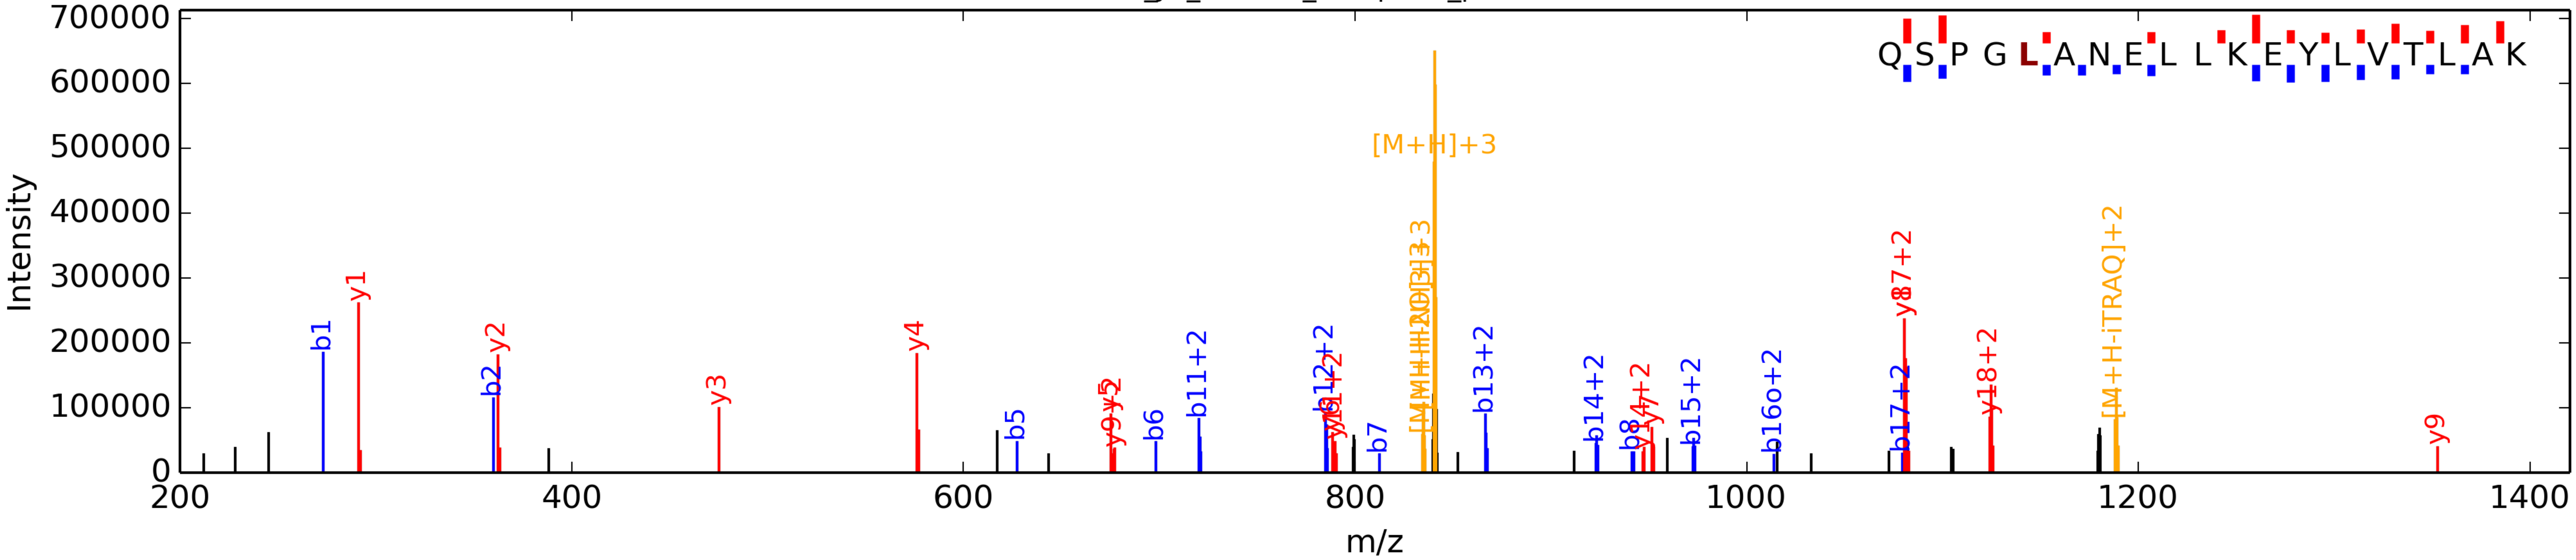

QSSQDDELK 144.10207@K9,144.10207@Q1, 2+  
 m= 1336.6714, matched intensity=83.0%, largest gap=0, sum gaps=0, gap at D6=0  
 CompRef\_2B\_P5-29\_P5-61\_P6-34\_P6-38\_W\_BI\_20130503\_H-JQ\_f04, scan:4608

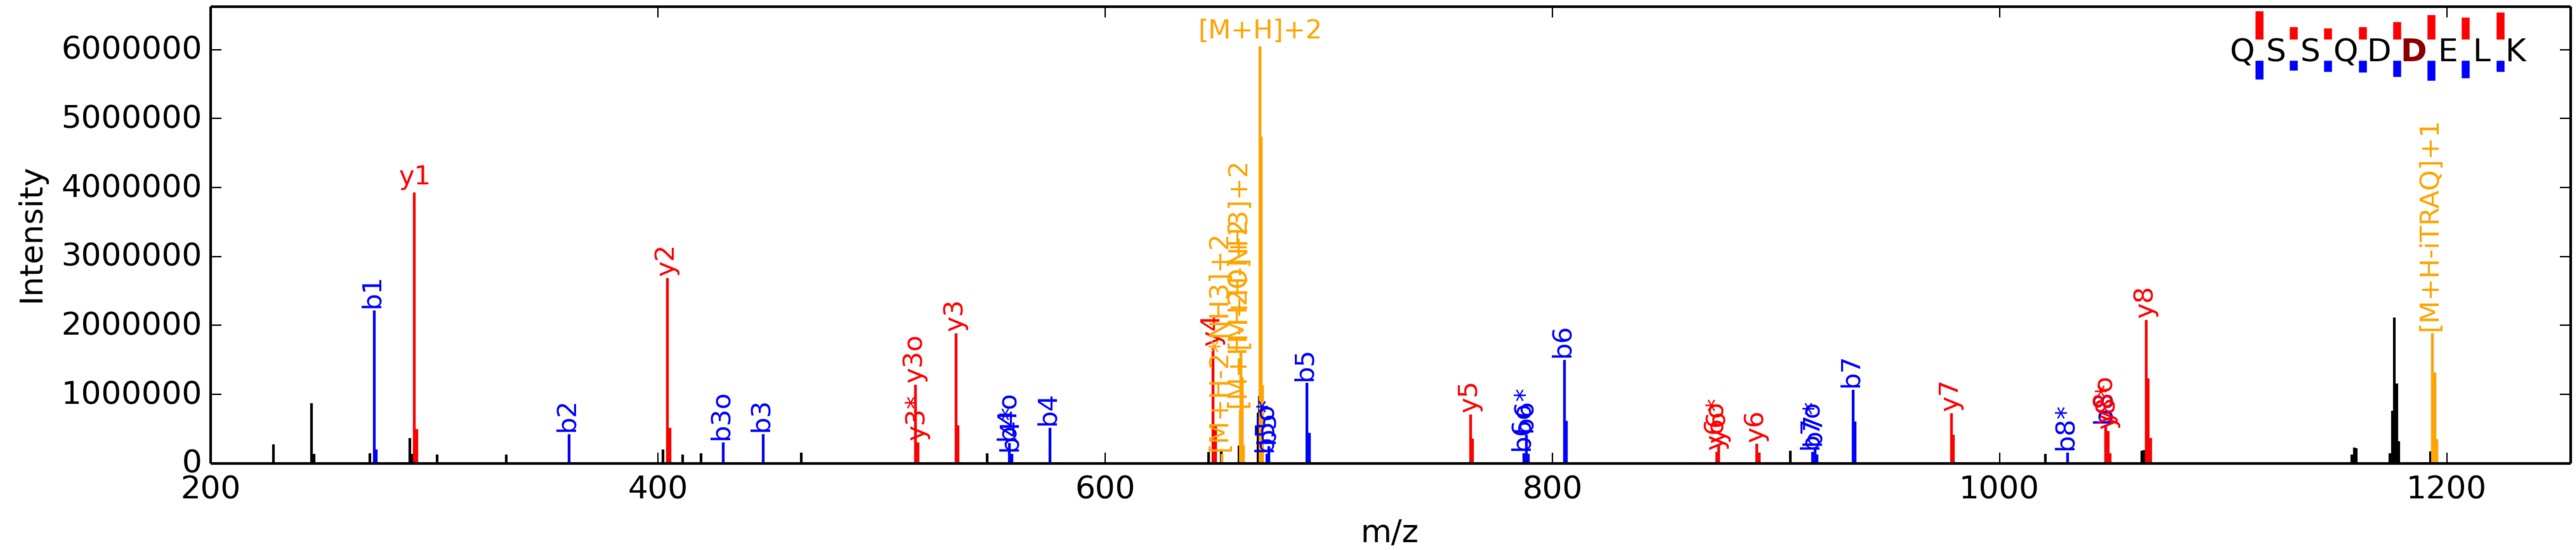



QSSQDDELKSSMLK 144.10207@K9,144.10207@K14,144.10207@Q1, 3+  
 m= 2027.0571, matched intensity=85.0%, largest gap=0, sum gaps=0, gap at D6=0  
 H20120525\_JQ\_CPTAC2\_Compref4\_protfxn15, scan:13294

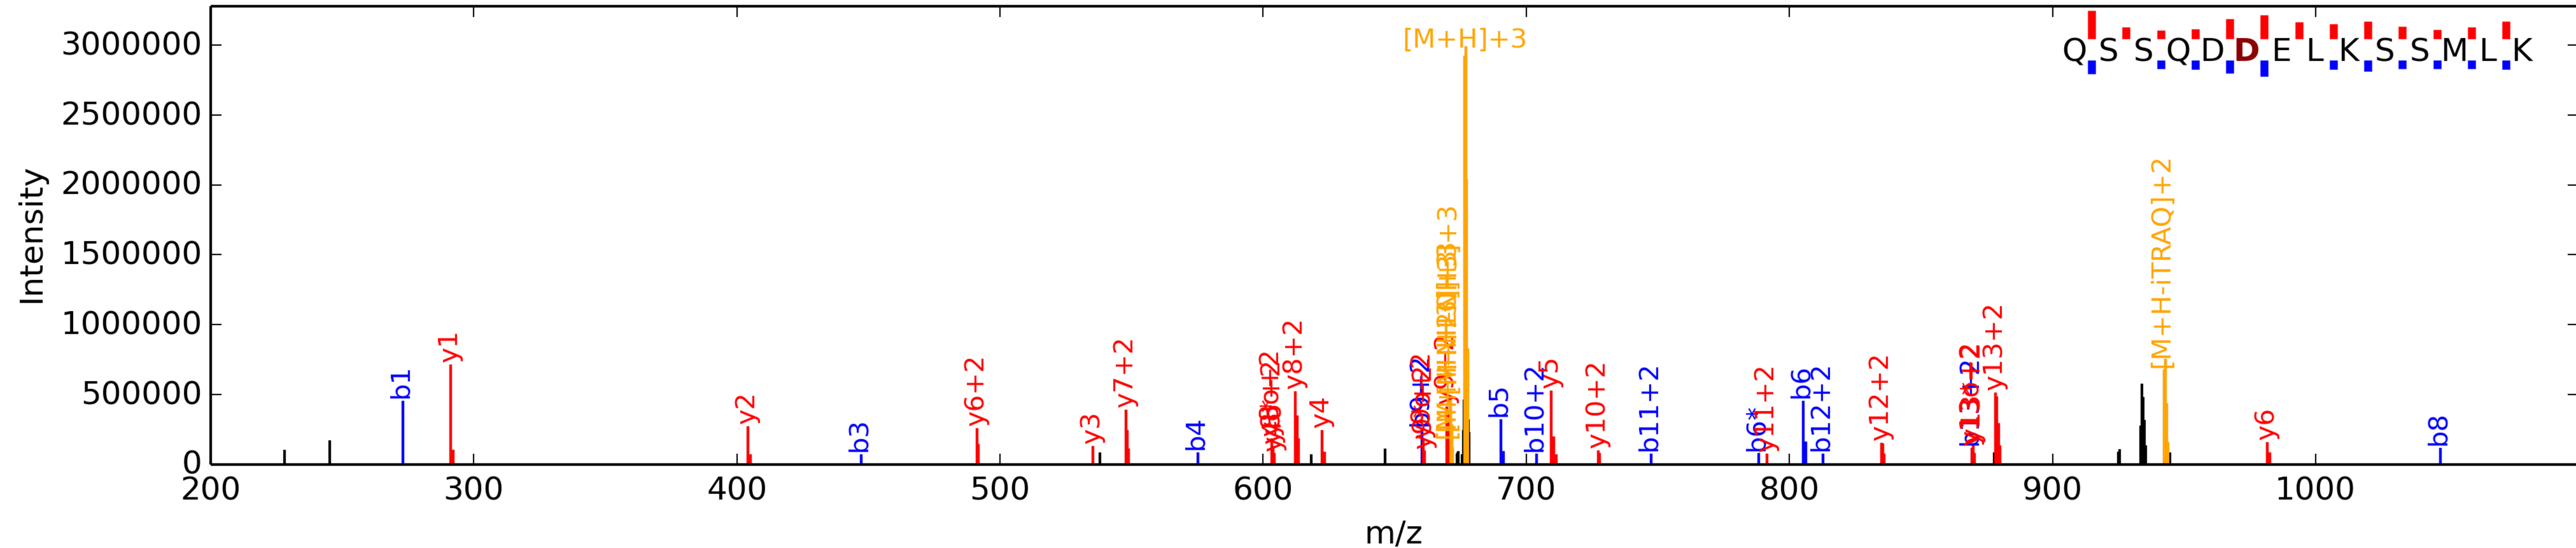



QVTSSGVSYGGTVSLQDAVTR 144.10207@Q1, 3+  
m= 2255.1515, matched intensity=60.9%, largest gap=1, sum gaps=1, gap at Y9=0  
TCGA\_CompRef\_W\_PNNL\_B2S7\_f18, scan:7147

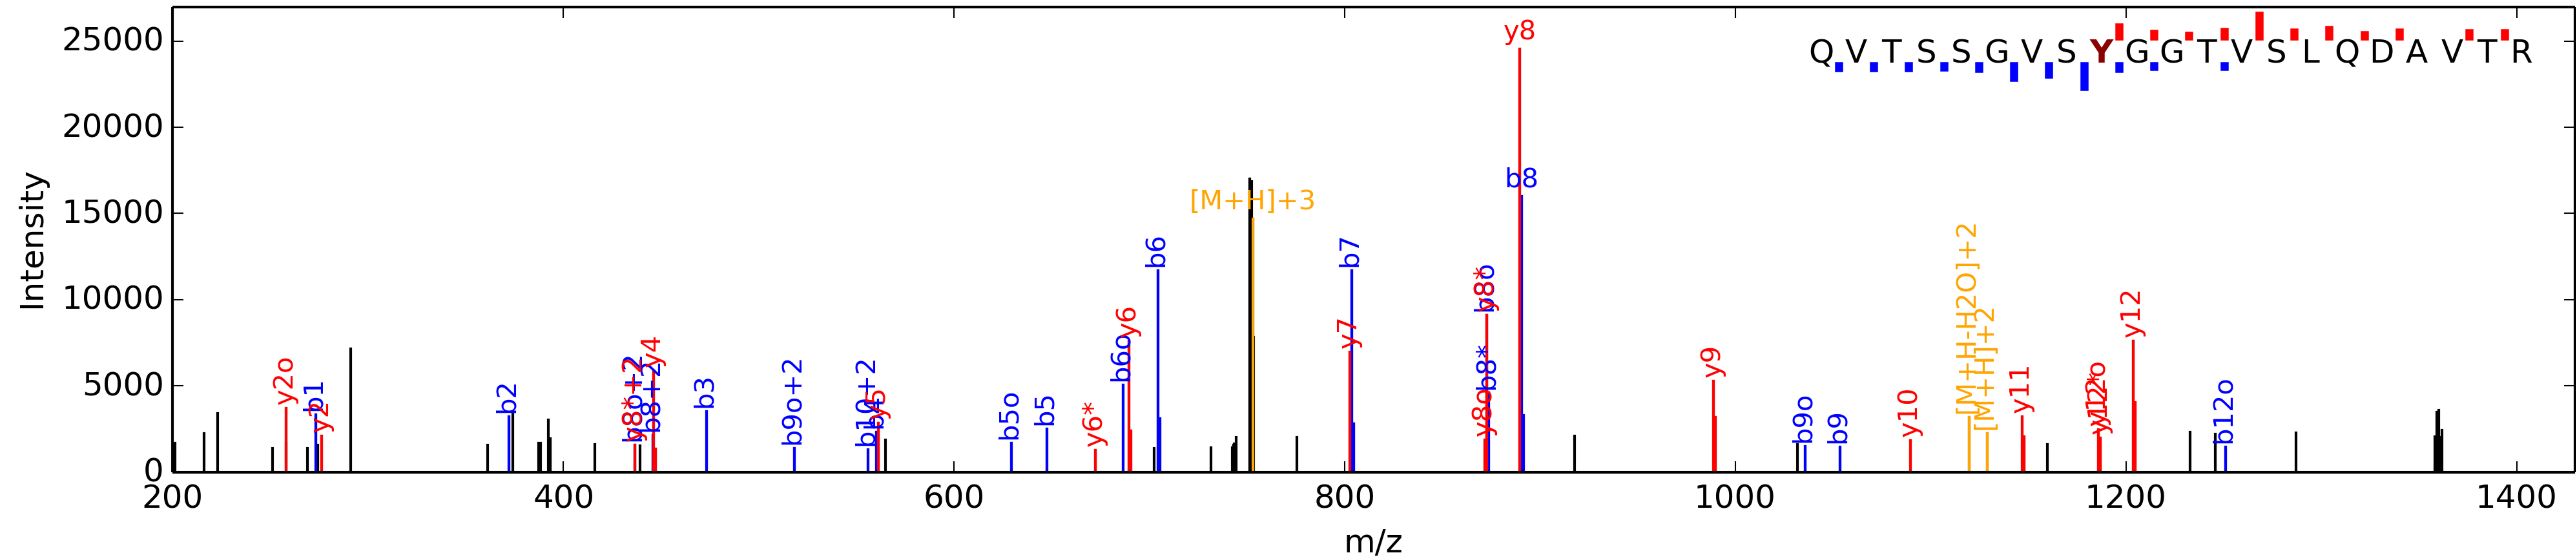



QVVECVGNQMGVGK 57.02200@C5,144.10207@K14,144.10207@Q1, 3+  
m= 1791.9221, matched intensity=64.9%, largest gap=0, sum gaps=0, gap at C5=0  
H20120525\_JQ\_CPTAC2\_Compref4\_protfxn04, scan:17466

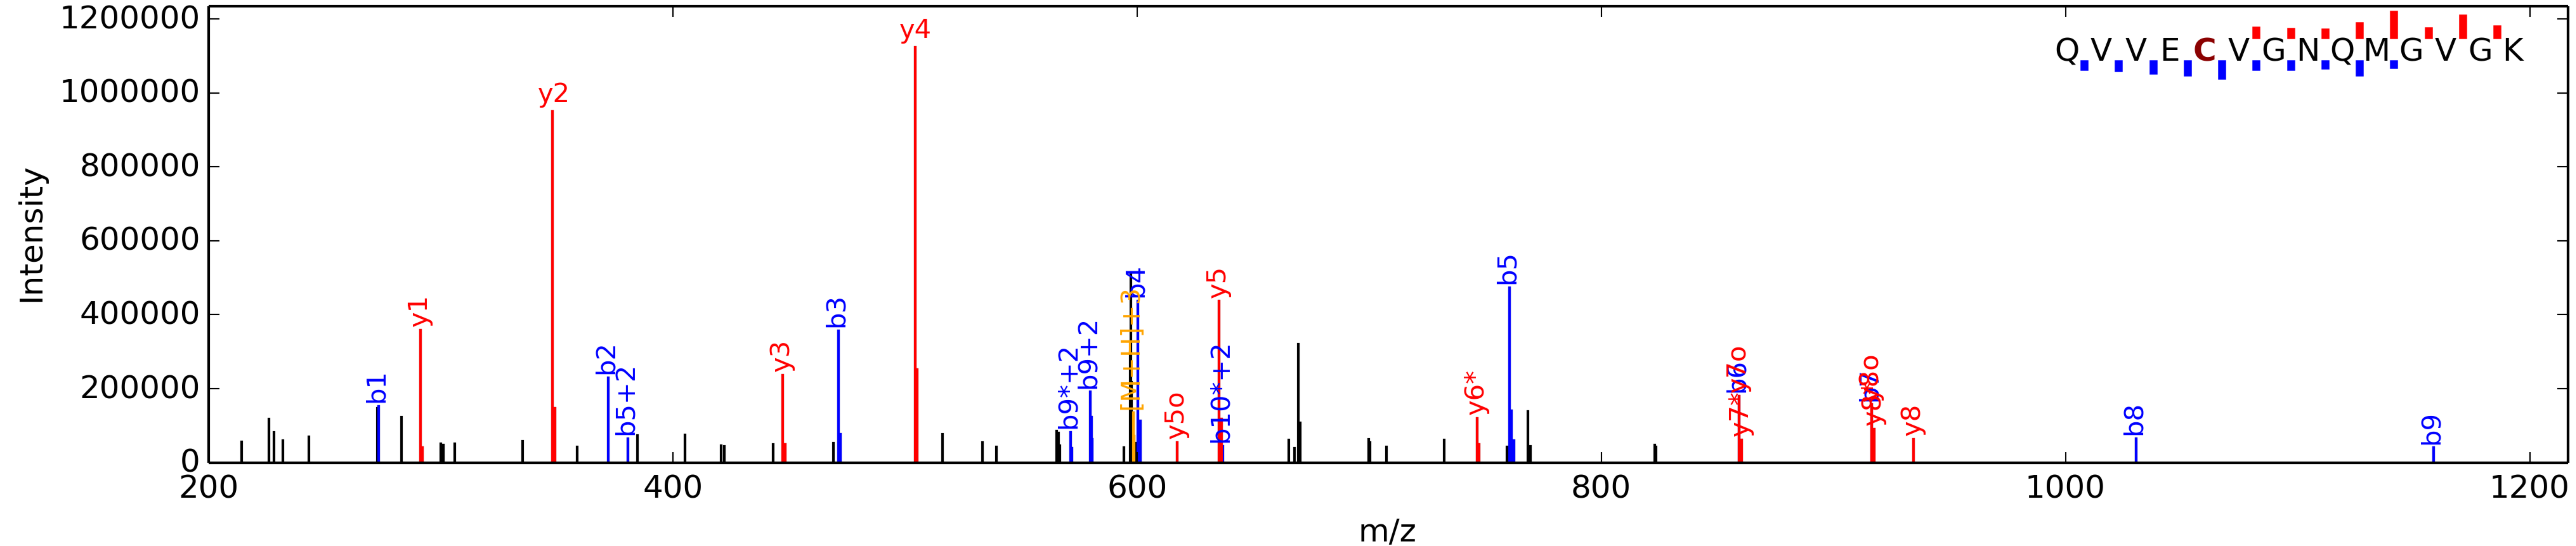

QYAPNTQVEILPQGR 144.10207@Q1, 2+  
 m= 1856.9867, matched intensity=84.7%, largest gap=0, sum gaps=0, gap at R15=0  
 CompRef\_P5-65\_P6-20\_P5-71\_P6-62\_W\_BI\_20131120\_f05, scan:20554

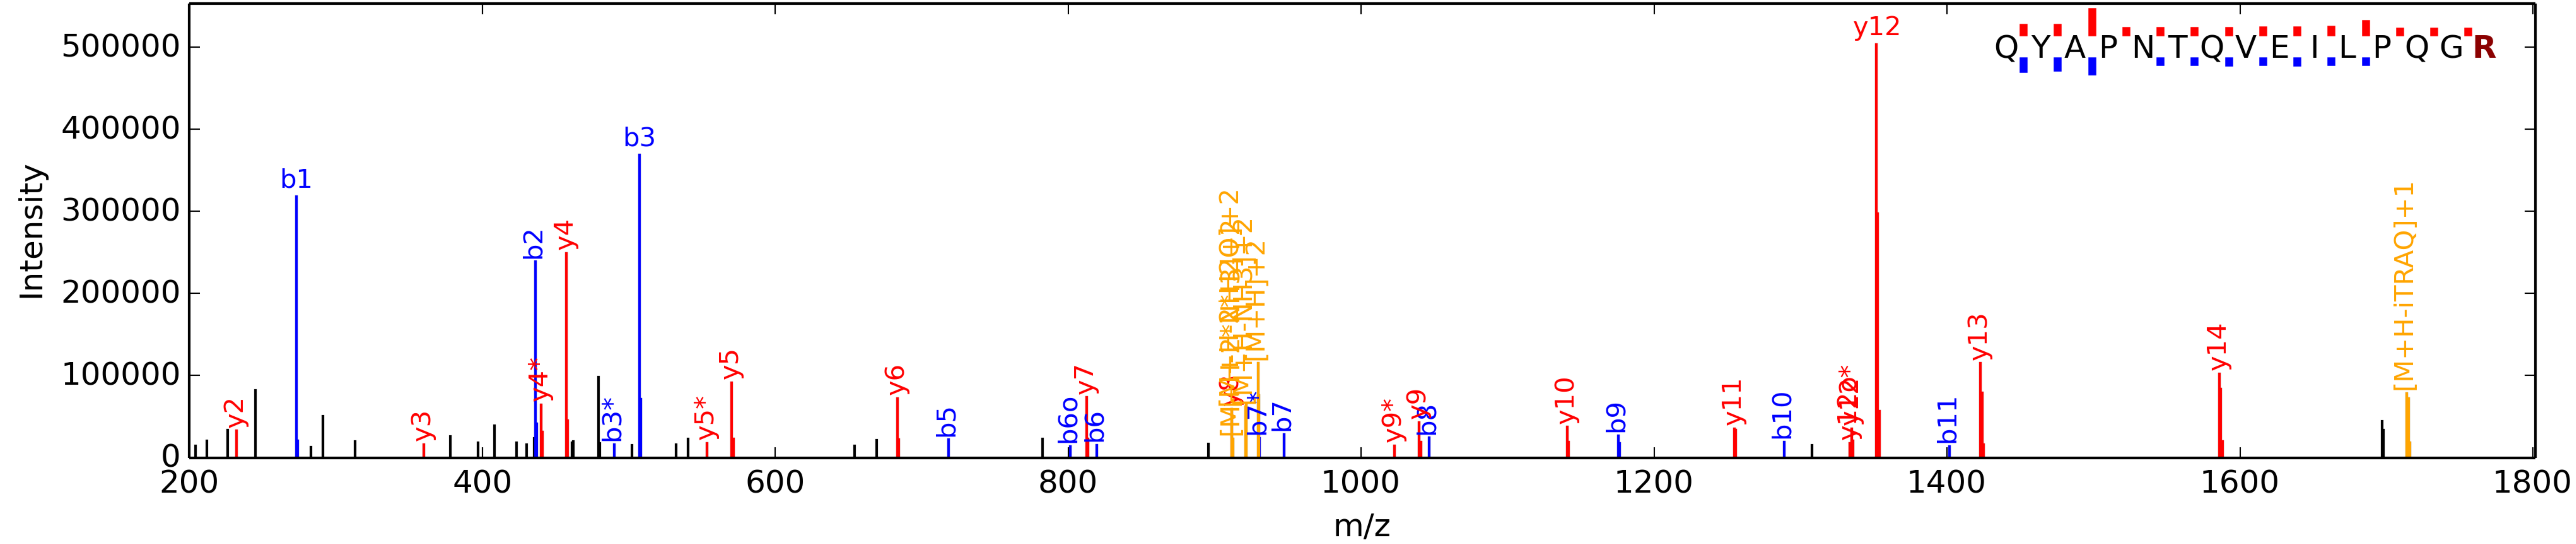

RDDDGTLHAACQVQPSATLDAAQPR 57.02200@C11,144.10207@R1, 3+  
m= 2836.3649, matched intensity=79.2%, largest gap=2, sum gaps=4, gap at T6=1  
cptac\_p5p6\_w\_pool\_jhu\_05172013\_f1, scan:6284

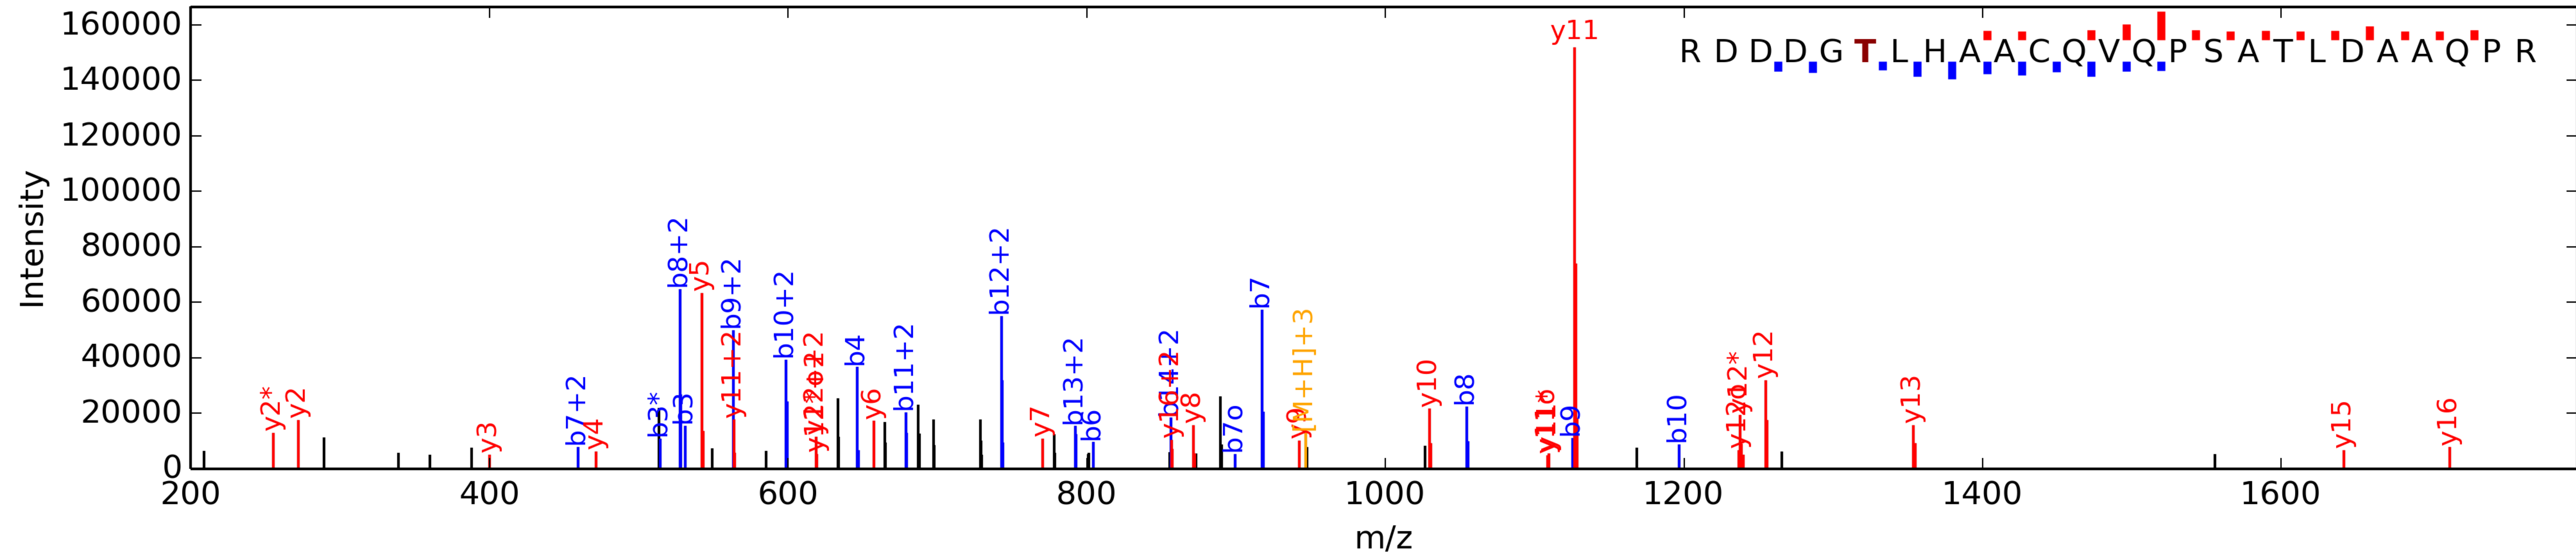



RDDKIDKPSLLTMMK 144.10207@K4,144.10207@K7,144.10207@K15,144.10207@R1, 3+  
 m= 2366.3513, matched intensity=91.2%, largest gap=1, sum gaps=1, gap at D6=0  
 CompRef\_P5-25\_P5-19\_P6-85\_P6-58\_W\_BI\_20130717\_f16, scan:18832

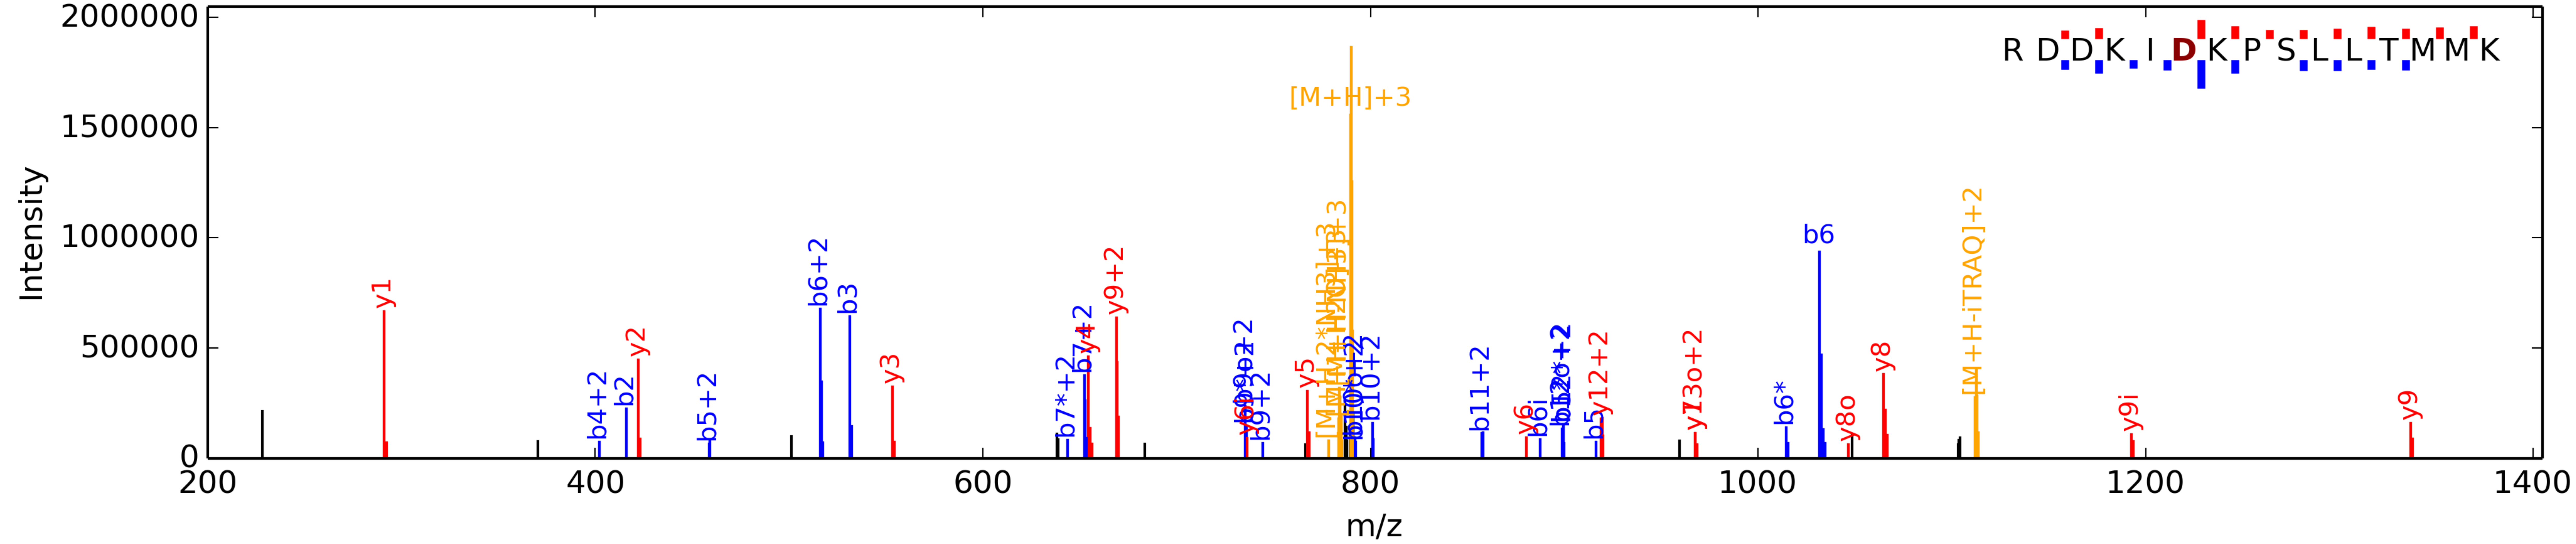

R D D K I D K P S L L T M M K

REEMQLFHDDQGSVTR 144.10207@R1, 3+  
m= 2220.0351, matched intensity=55.0%, largest gap=2, sum gaps=5, gap at S14=2  
cptac\_p32p33\_global\_itraq4\_trypticpep\_fraction\_02, scan:6266

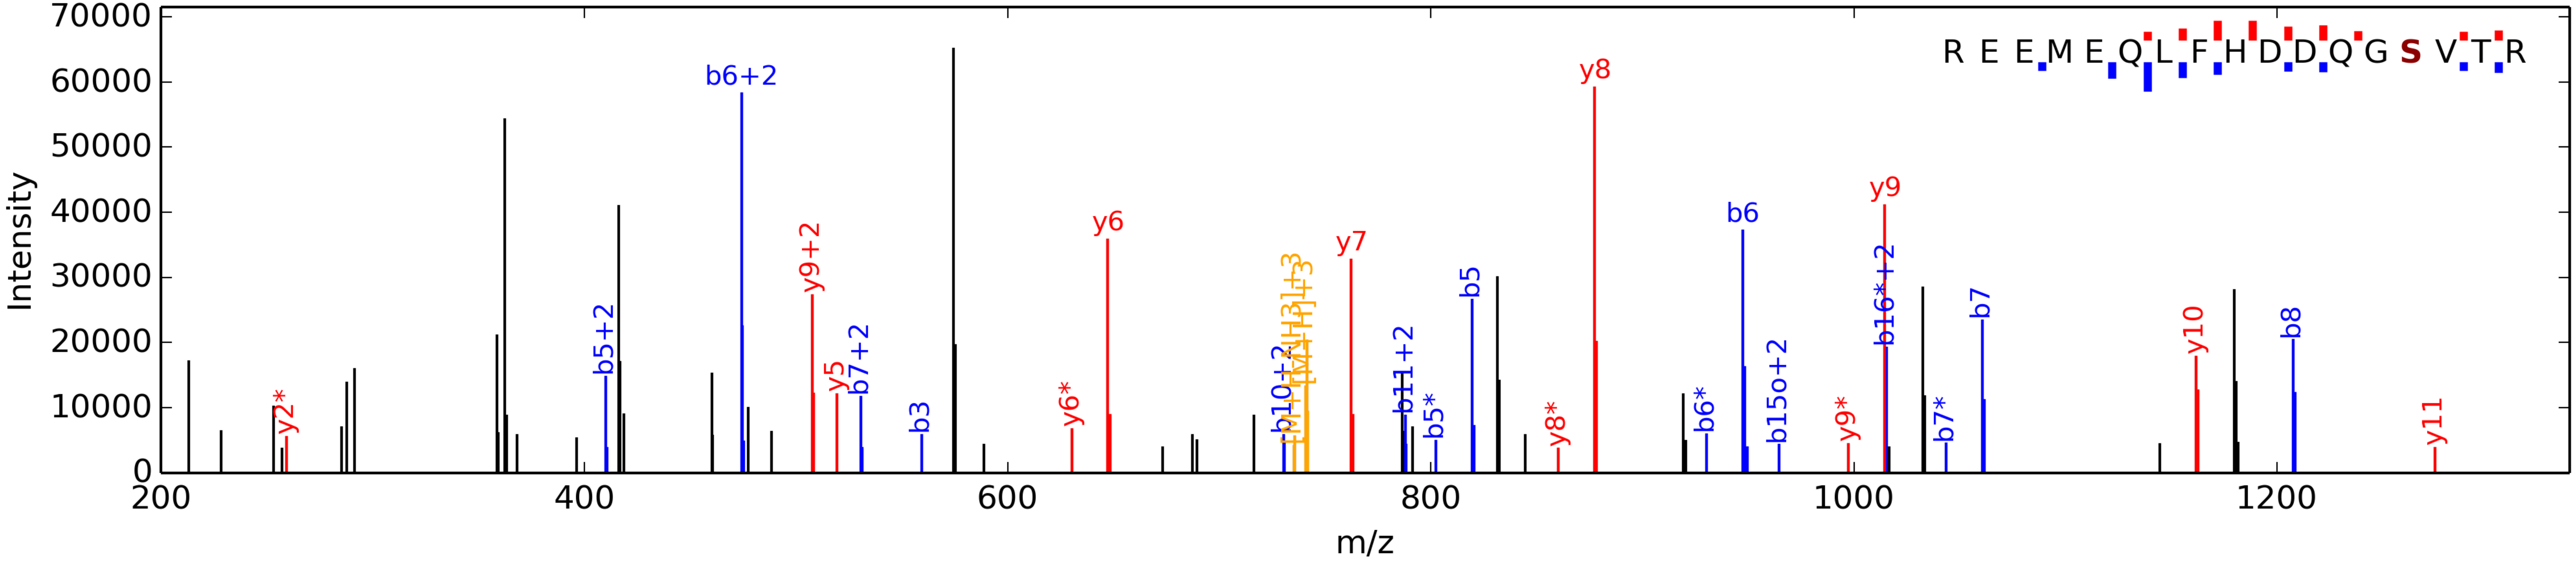

REPITLQDPAAK 144.10207@K12,144.10207@R1, 3+  
m= 1625.9345, matched intensity=59.5%, largest gap=1, sum gaps=1, gap at A10=0  
CompRef\_P5-65\_P6-20\_P5-71\_P6-62\_W\_BI\_20131120\_f19, scan:12542

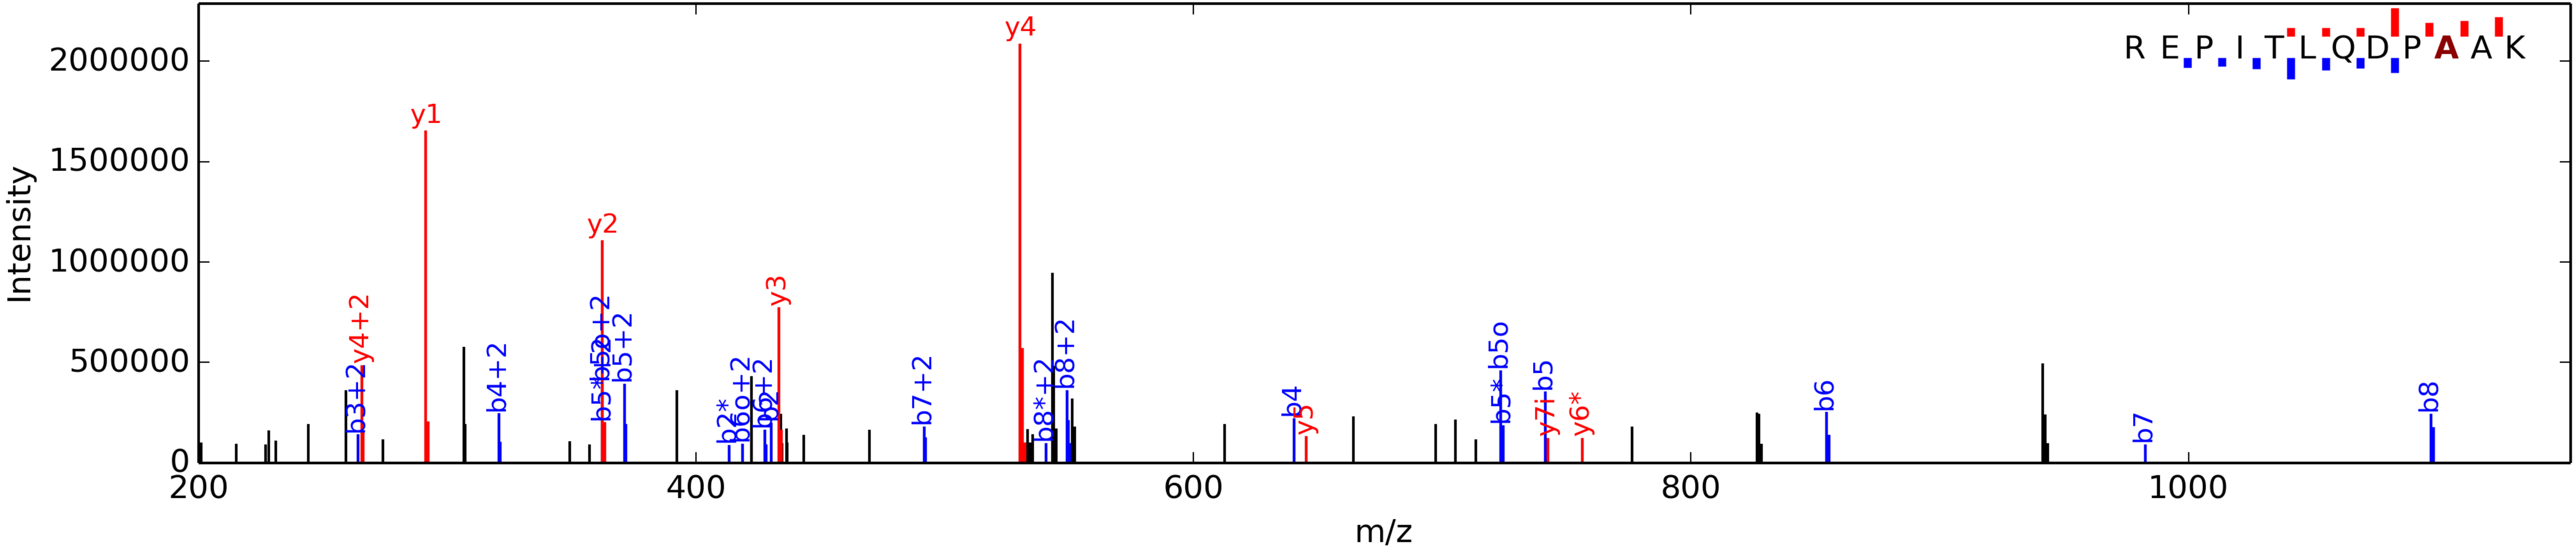



REVGTS DKEILTSR 144.10207@K8,144.10207@R1, 3+  
m= 1878.0414, matched intensity=84.5%, largest gap=2, sum gaps=2, gap at V3=0  
CPTAC\_CompRef\_test\_X\_iTRAQ\_06\_7Jan13\_Lynx\_12-11-07, scan:1701

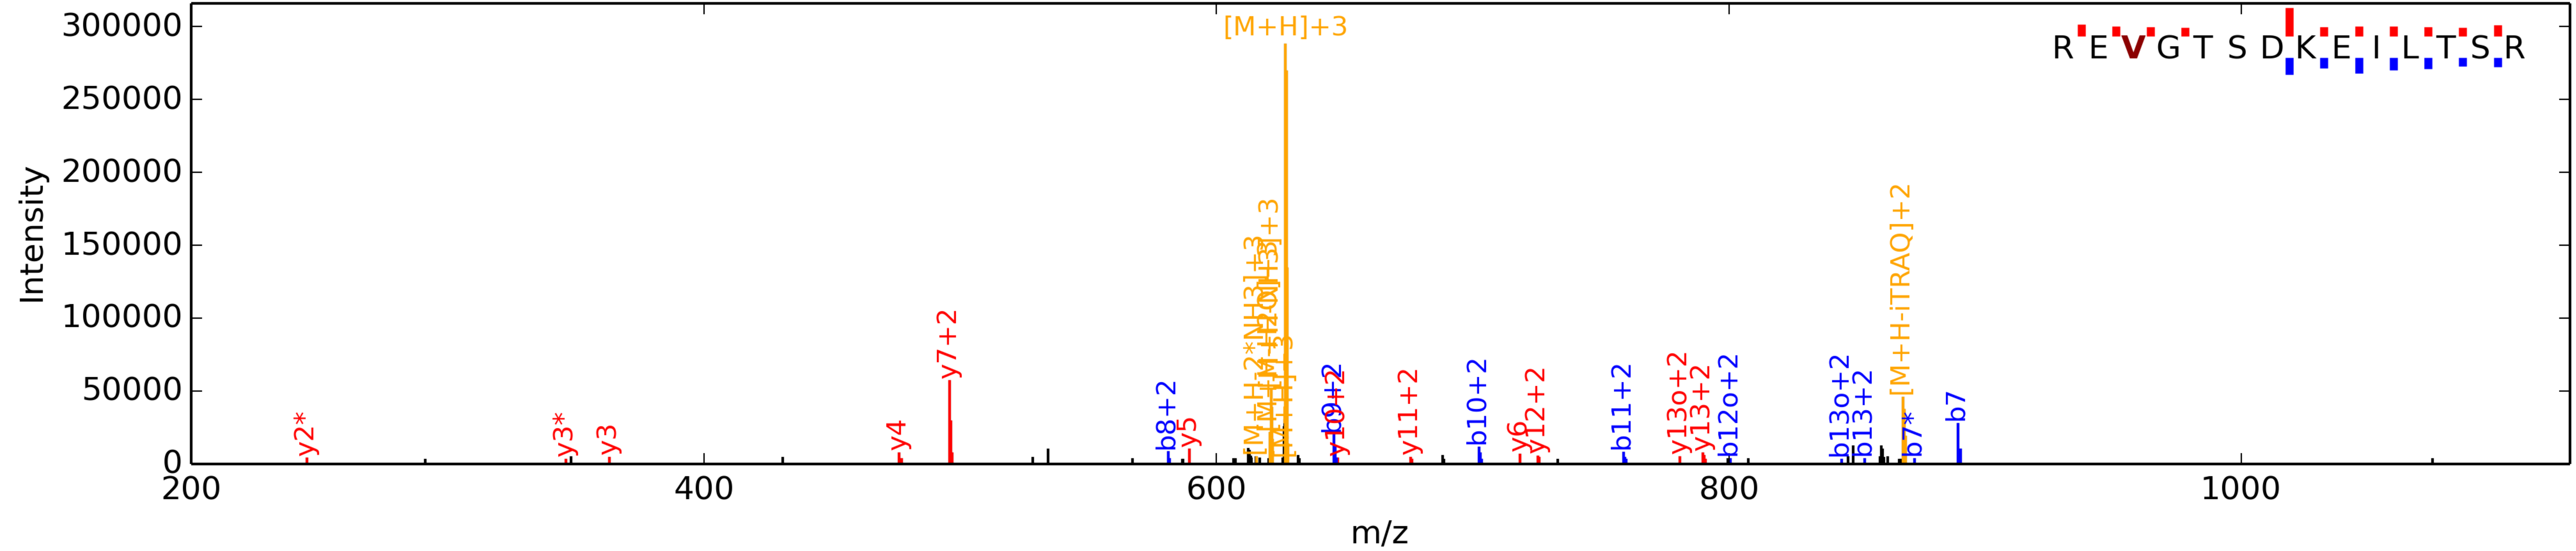

RGTDECAIESVAVAATPIPK 57.02200@C6,144.10207@K20,144.10207@R1, 3+  
m= 2372.2619, matched intensity=94.4%, largest gap=1, sum gaps=2, gap at V11=0  
H20130119\_PM\_CompRef\_BC1\_proteome\_fxn02, scan:24037

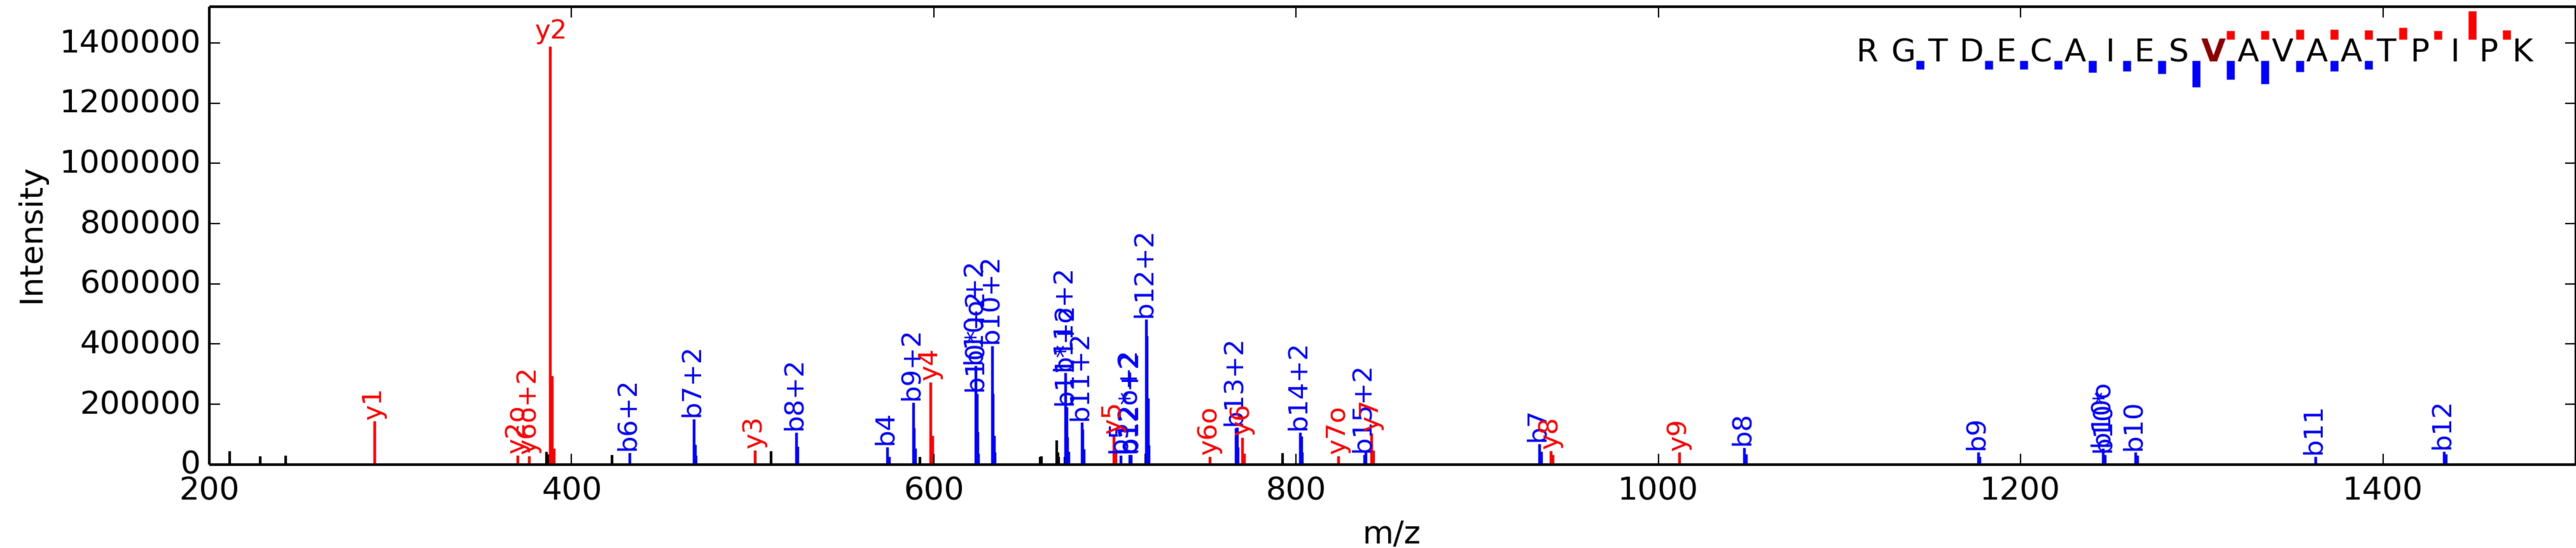



RLAAETGEGEGEPLSR 144.10207@R1, 3+  
m= 1814.9244, matched intensity=75.7%, largest gap=2, sum gaps=2, gap at A4=0  
CompRef\_P5-65\_P6-20\_P5-71\_P6-62\_W\_BI\_20131120\_f09, scan:10329

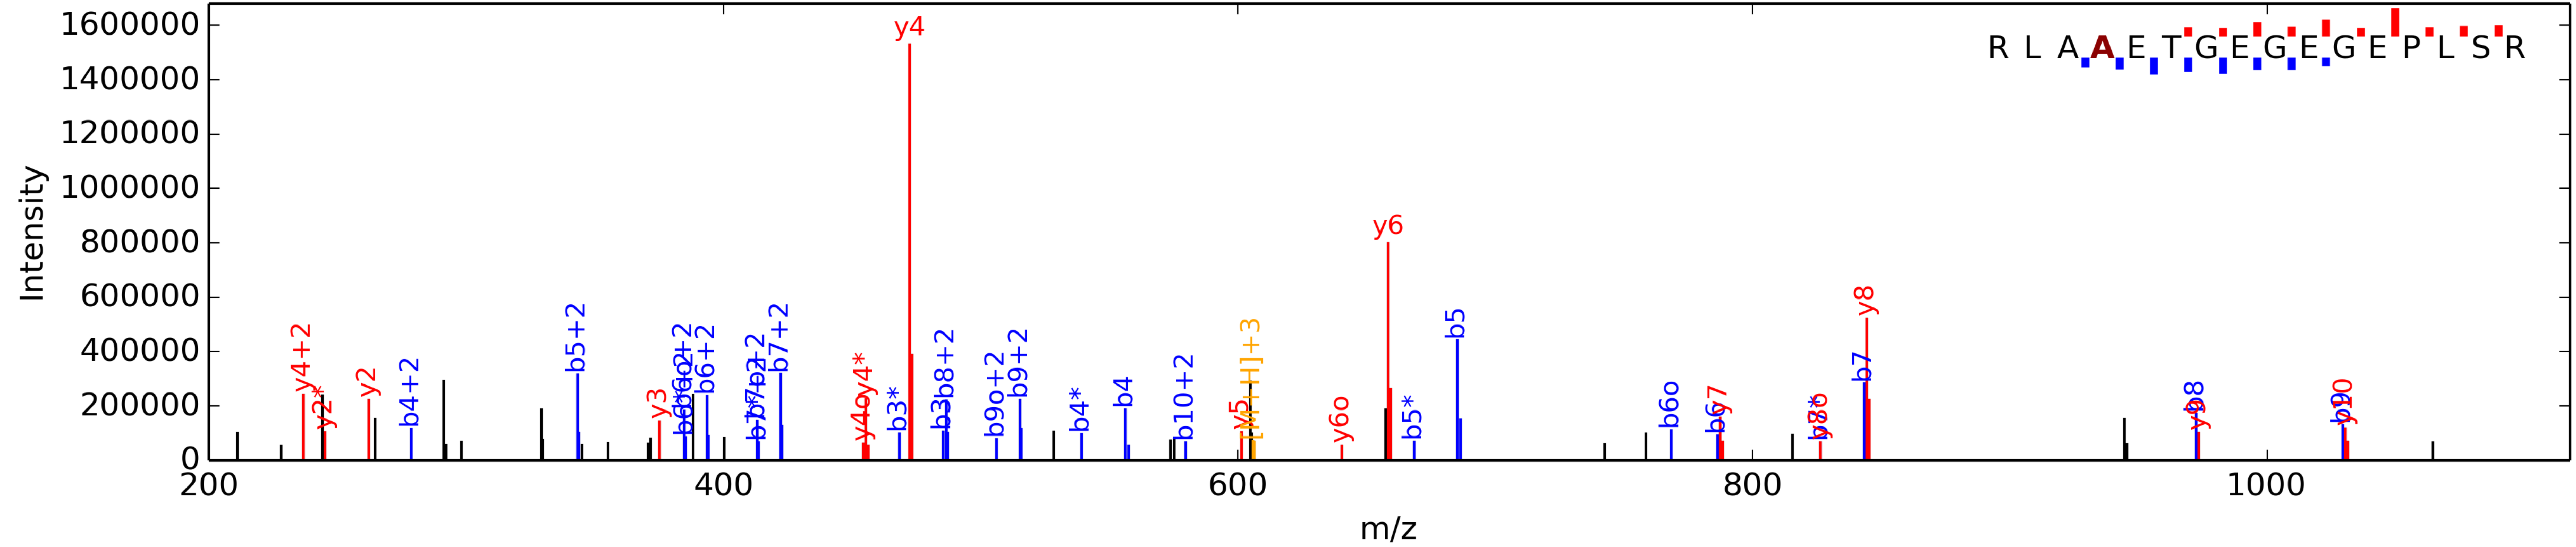



RLEGILEGLR 144.10207@R1, 3+

m= 1468.8848, matched intensity=69.4%, largest gap=1, sum gaps=1, gap at E7=0

CompRef\_2B\_P5-29\_P5-61\_P6-34\_P6-38\_W\_BI\_20130503\_H-JQ\_f11, scan:29269

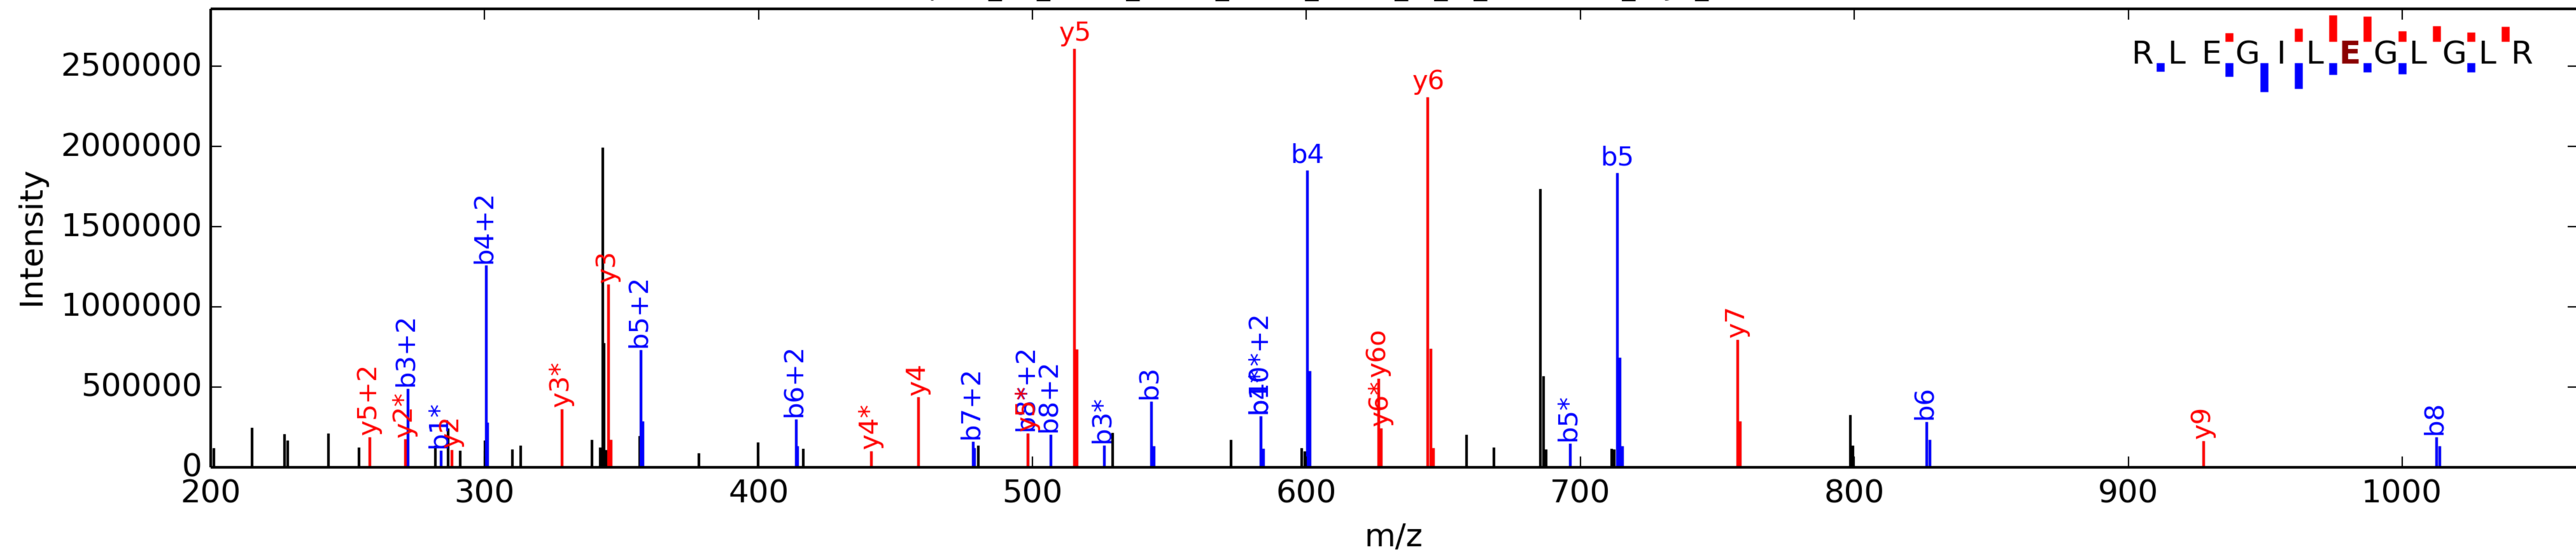

RLLNLPGYLQK 144.10207@K11,144.10207@R1, 3+  
m= 1601.9861, matched intensity=66.1%, largest gap=0, sum gaps=0, gap at L3=0  
CompRef\_P5-25\_P5-19\_P6-85\_P6-58\_W\_BI\_20130717\_f08, scan:23569

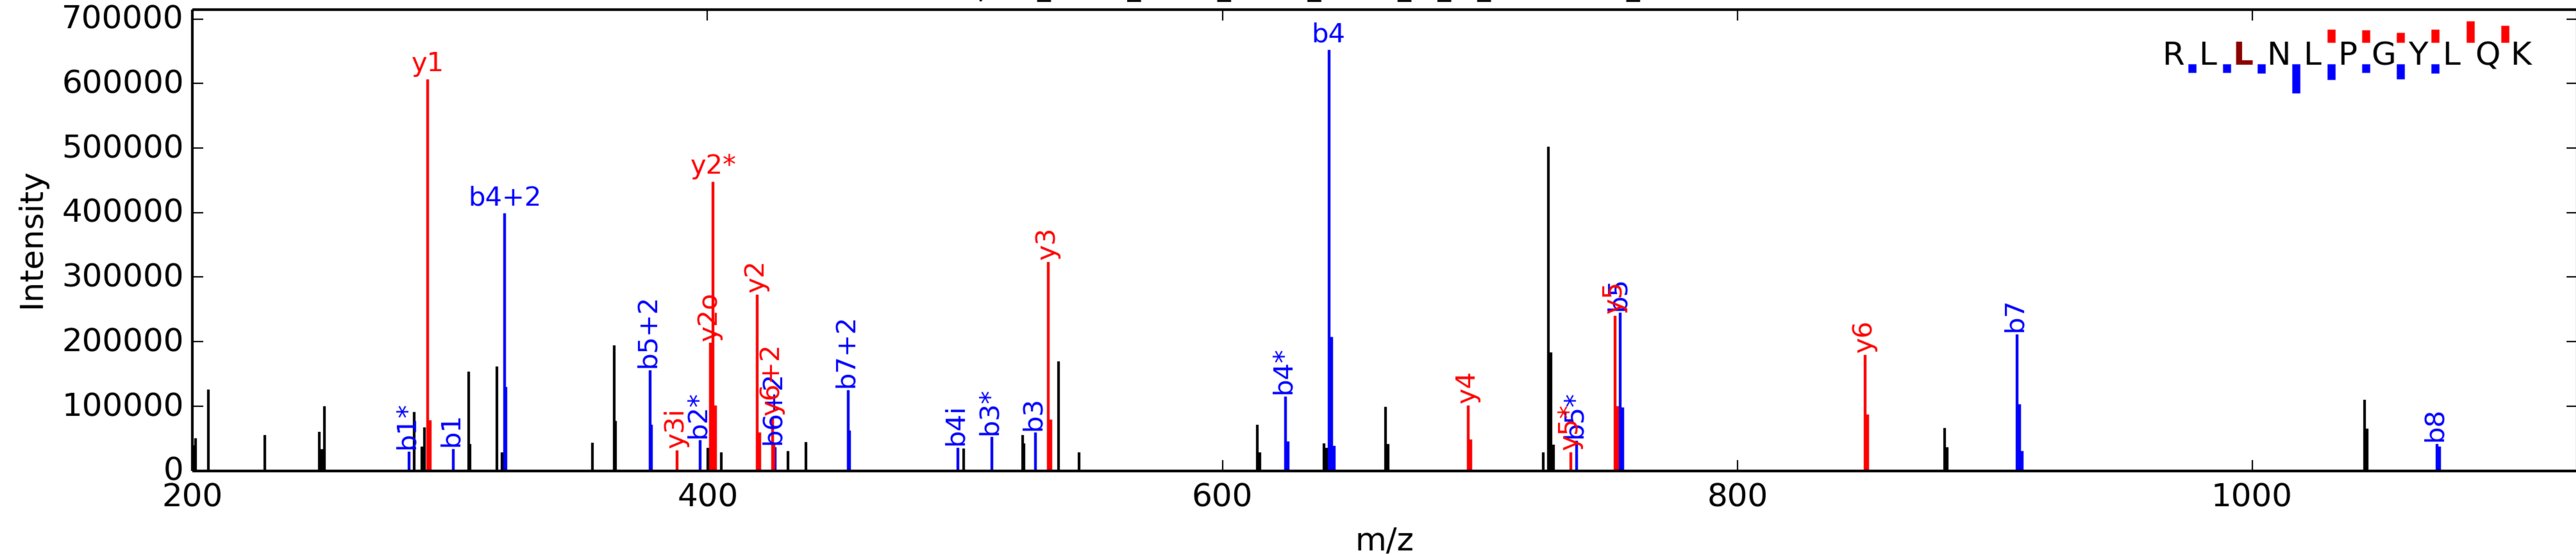

RLMDEAMILK 144.10207@K10,144.10207@R1, 3+  
m= 1506.8506, matched intensity=77.6%, largest gap=0, sum gaps=0, gap at M7=0  
CompRef\_2B\_P5-29\_P5-61\_P6-34\_P6-38\_W\_BI\_20130503\_H-JQ\_f09, scan:21350

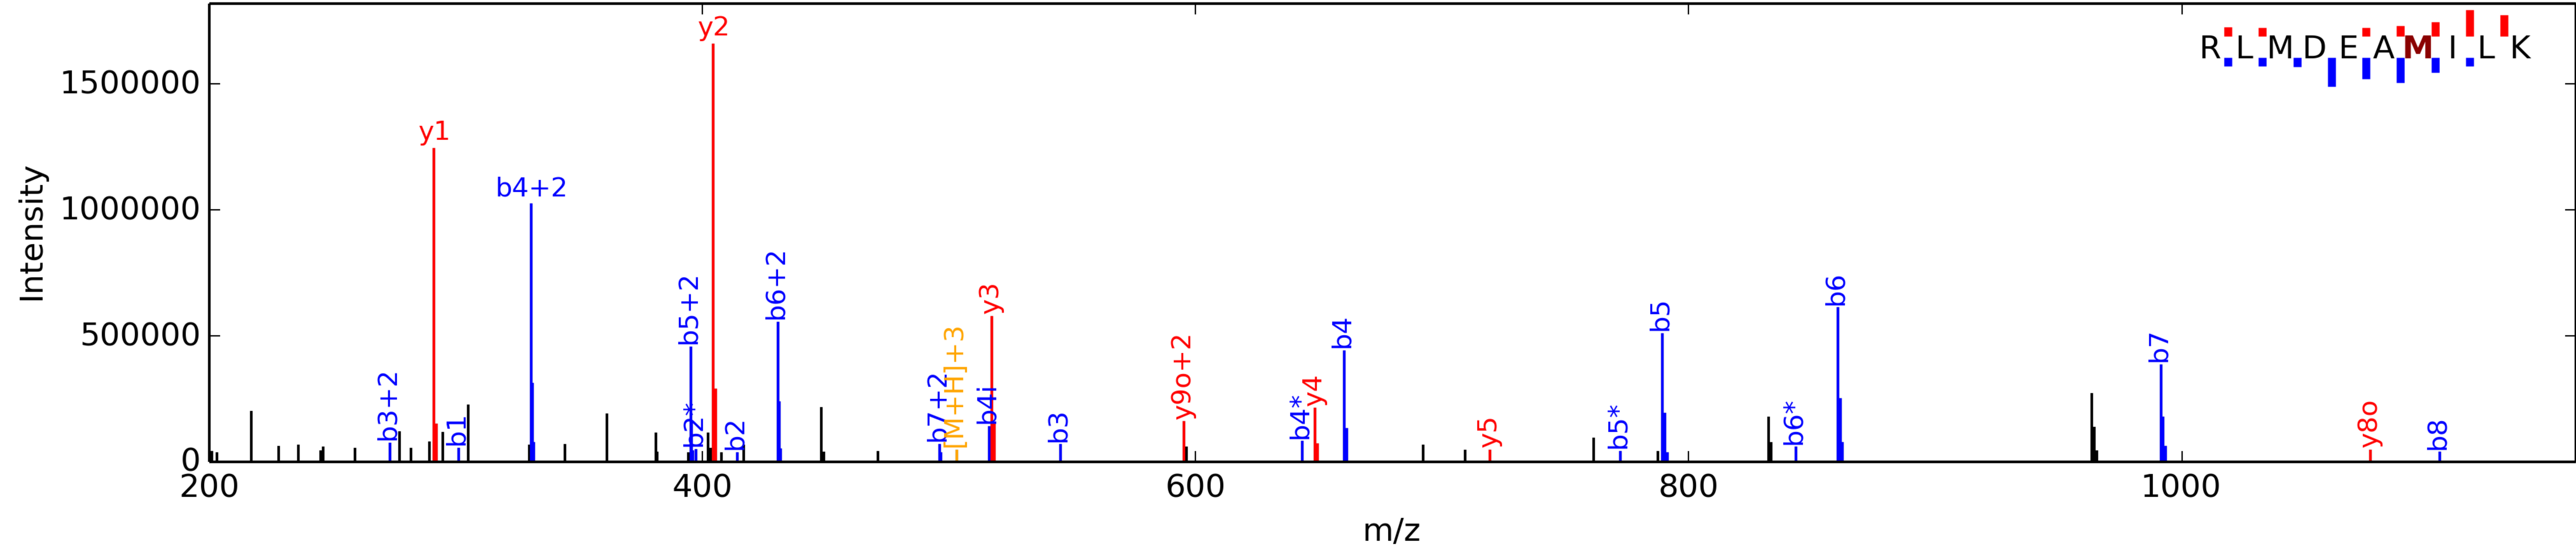





RPEGACGDGQSSK 57.02200@C6,144.10207@K13,144.10207@R1, 3+  
m= 1635.7884, matched intensity=50.2%, largest gap=1, sum gaps=2, gap at K13=0  
H20120525\_JQ\_CPTAC2\_Compref4\_protfxn05, scan:3268

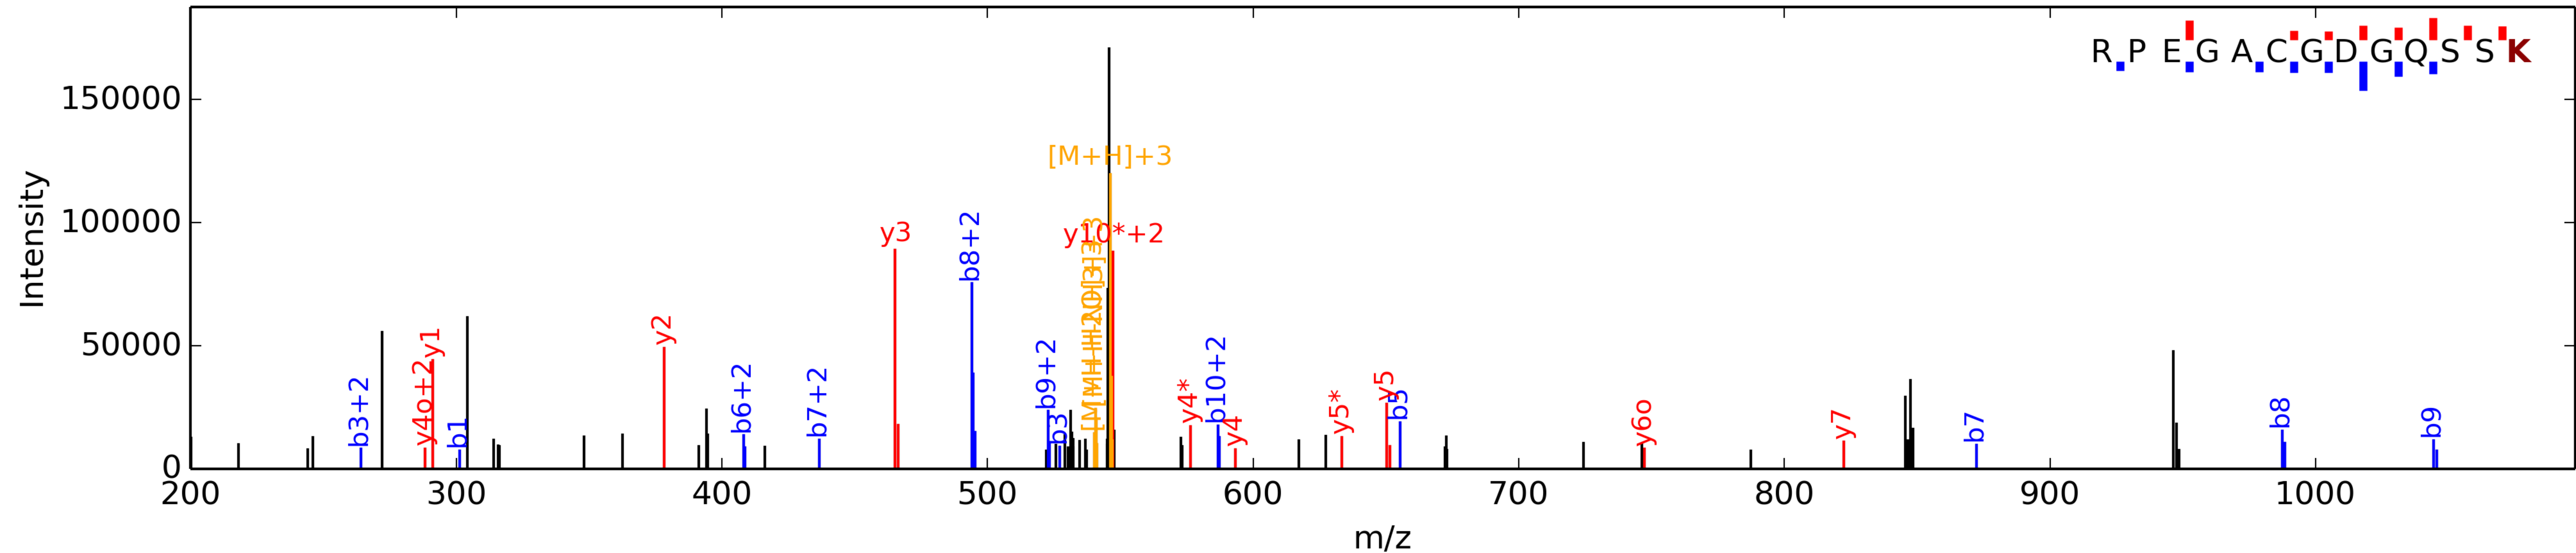





RPQVTLDPSEK 144.10207@K12,144.10207@R1, 3+  
m= 1669.9607, matched intensity=69.2%, largest gap=1, sum gaps=1, gap at S10=0  
cptac\_p5p6\_w\_itraq4\_jhu\_04292013\_f10, scan:6902

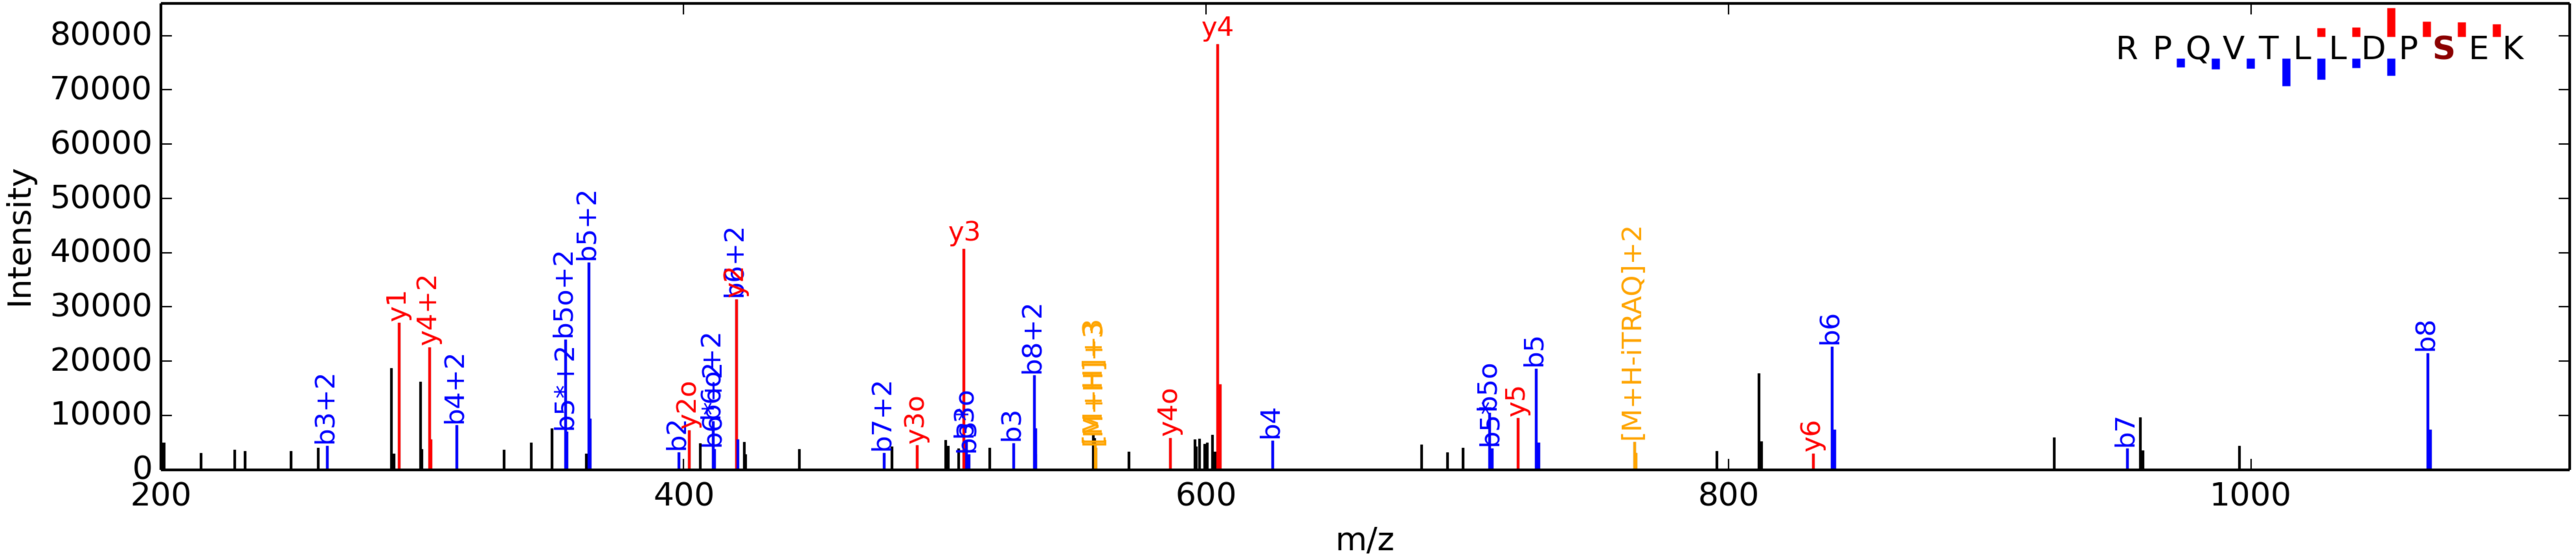

RQDIQSDGFSIETCK 57.02200@C14,144.10207@K15,144.10207@R1, 3+  
 m= 2071.0253, matched intensity=75.6%, largest gap=0, sum gaps=0, gap at Q5=0  
 cptac\_p32p33\_global\_itraq4\_trypticpep\_fraction\_06, scan:5681

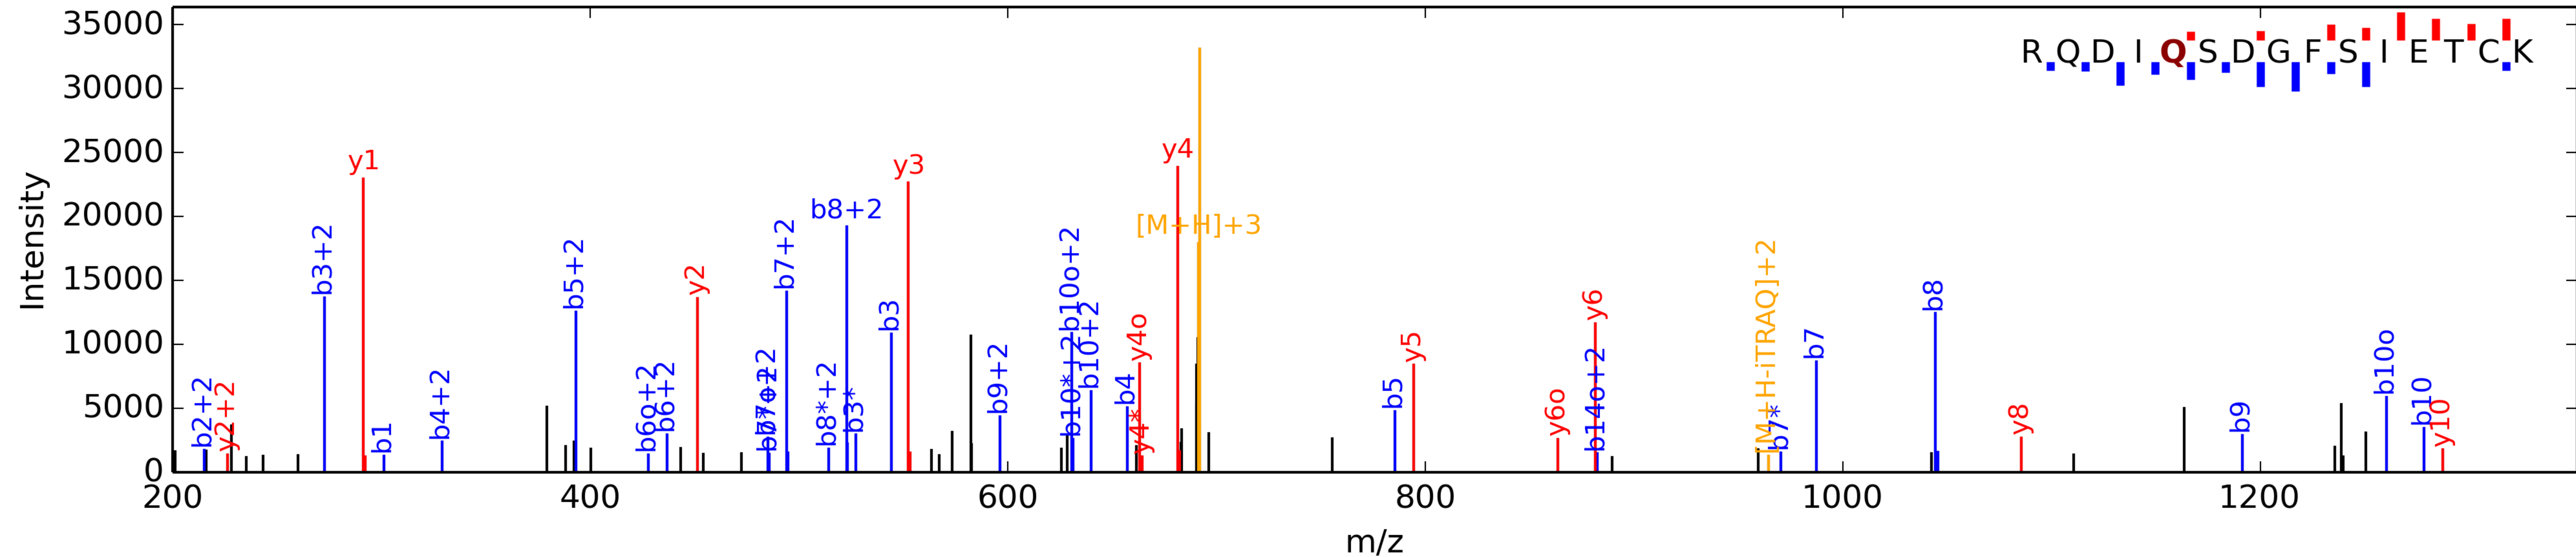

RQDYQEILDSPK 144.10207@K13,144.10207@R1,79.96633@S10, 3+  
m= 1971.9911, matched intensity=64.5%, largest gap=1, sum gaps=1, gap at R1=1  
CPTAC\_CompREF\_00\_iTRAQ\_NiNTA\_05b\_26Mar12\_Lynx\_12-02-31, scan:14416

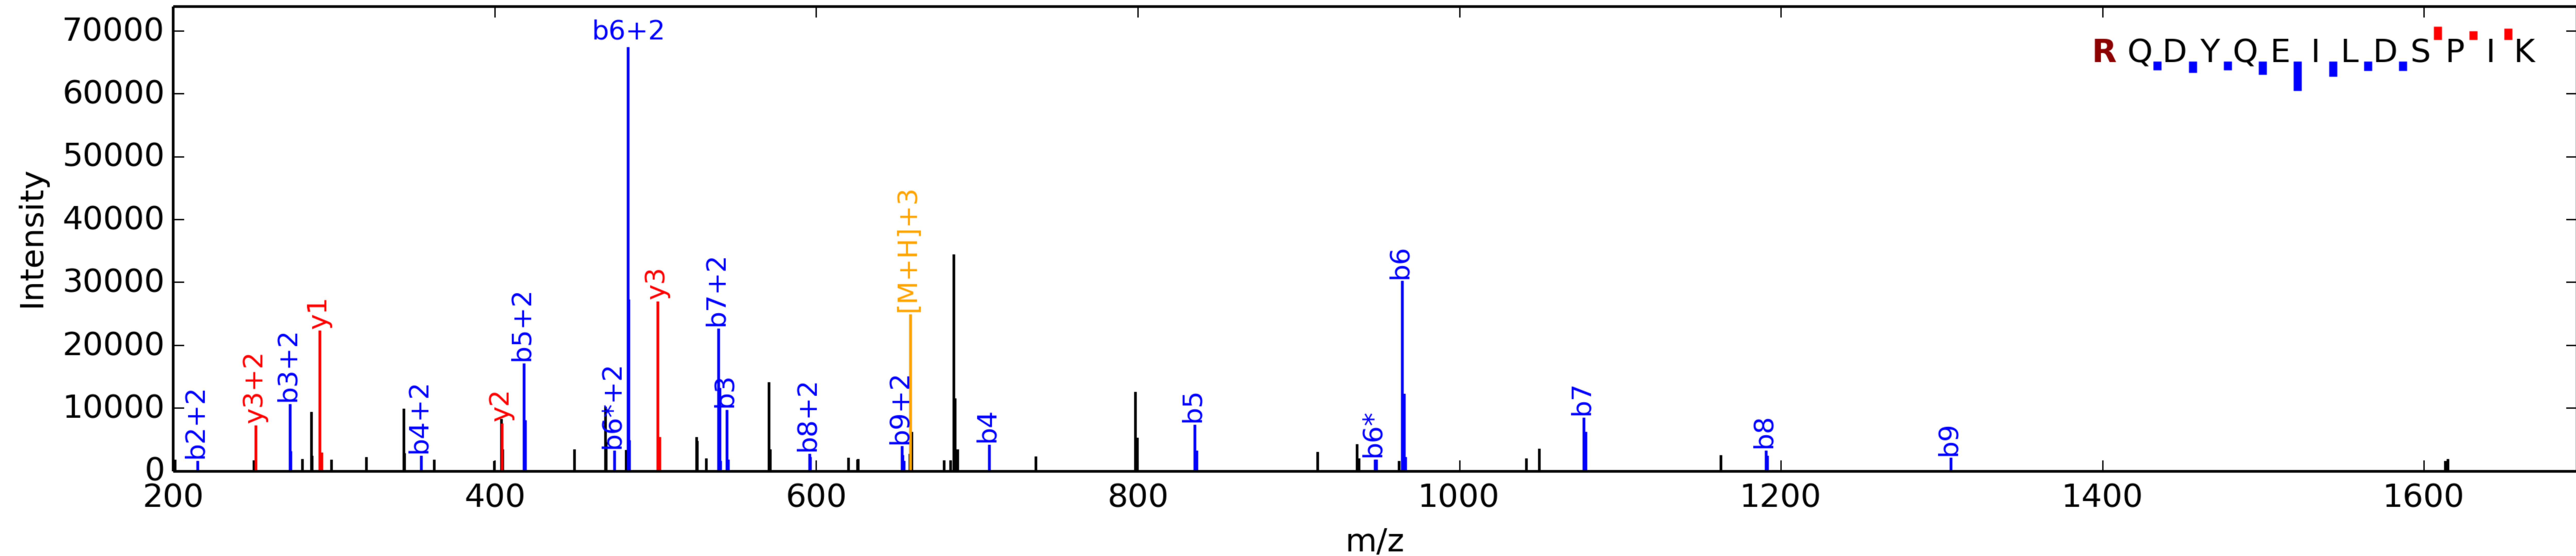



RREPITLQDPAAK 144.10207@K13,144.10207@R1, 3+  
m= 1782.0356, matched intensity=81.1%, largest gap=1, sum gaps=1, gap at A11=0  
CompRef\_2A\_P5-29\_P5-61\_P6-34\_P6-38\_W\_BI\_20130502\_H-JQ\_f21, scan:8502

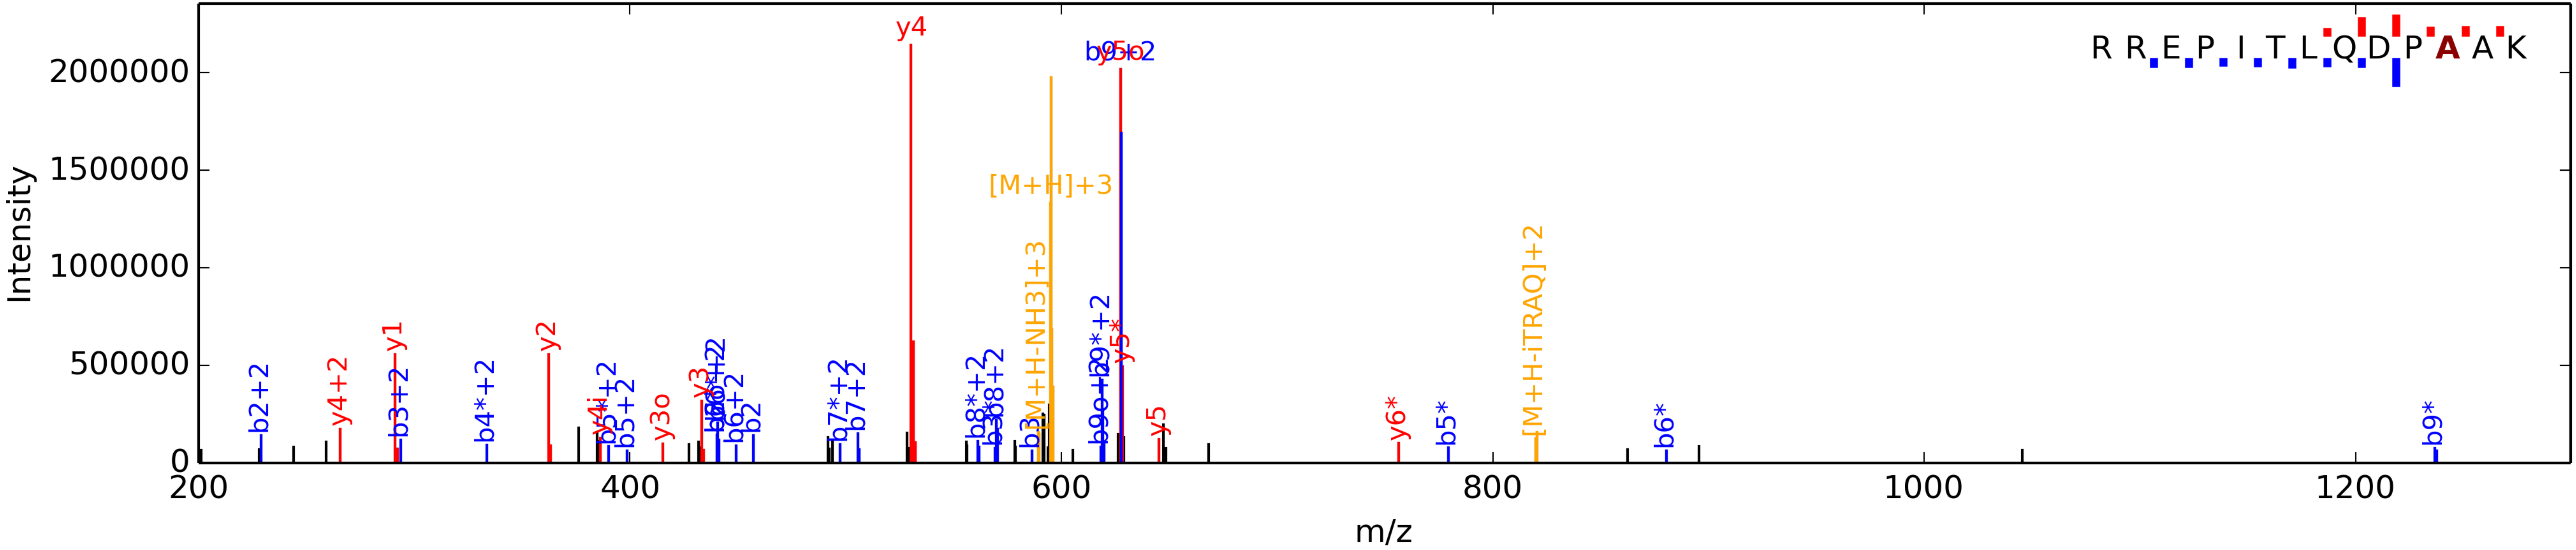

R R E P I T L Q D P A A K

RTSDPALCLIVSAAADSAVR 57.02200@C8,144.10207@R1, 3+  
m= 2313.2238, matched intensity=67.8%, largest gap=2, sum gaps=4, gap at P9=0  
CompRef\_P5-65\_P6-20\_P5-71\_P6-62\_W\_BI\_20131120\_f12, scan:25934

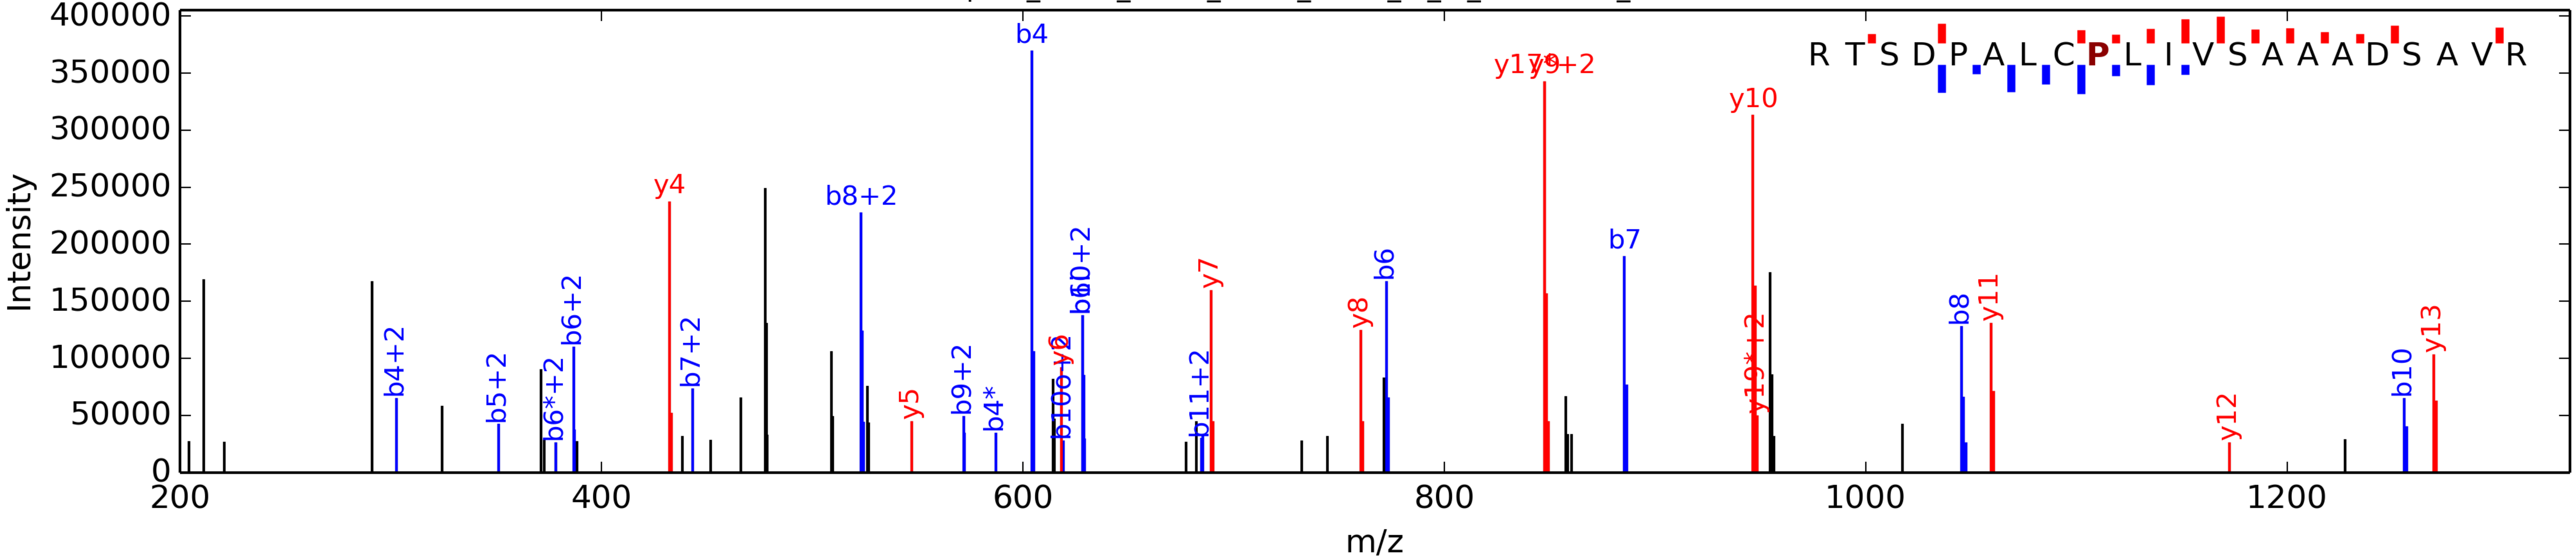

RYEEEEEEEEDEEEMEEEEK 144.10207@K19,144.10207@R1, 3+  
 m= 2806.1378, matched intensity=64.0%, largest gap=2, sum gaps=2, gap at K19=0  
 CompRef\_2A\_P5-29\_P5-61\_P6-34\_P6-38\_W\_BI\_20130502\_H-JQ\_fA, scan:10885

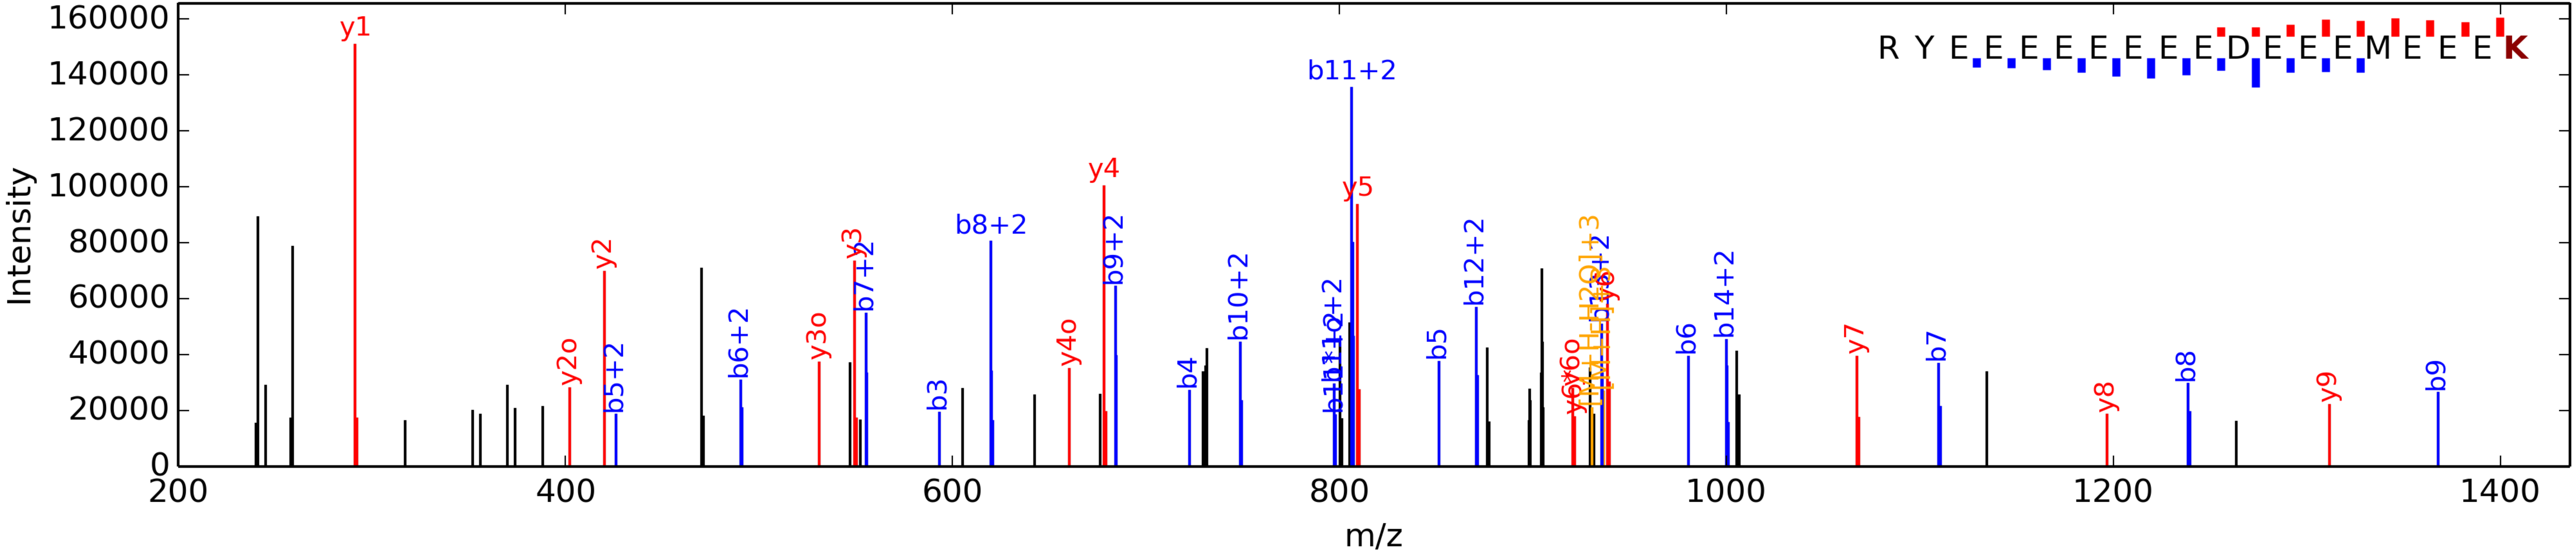



RYNDLLASAK 144.10207@K10,144.10207@R1, 3+  
m= 1437.8184, matched intensity=80.0%, largest gap=0, sum gaps=0, gap at R1=0  
CompRef\_2B\_P5-29\_P5-61\_P6-34\_P6-38\_W\_BI\_20130503\_H-JQ\_f07, scan:12683

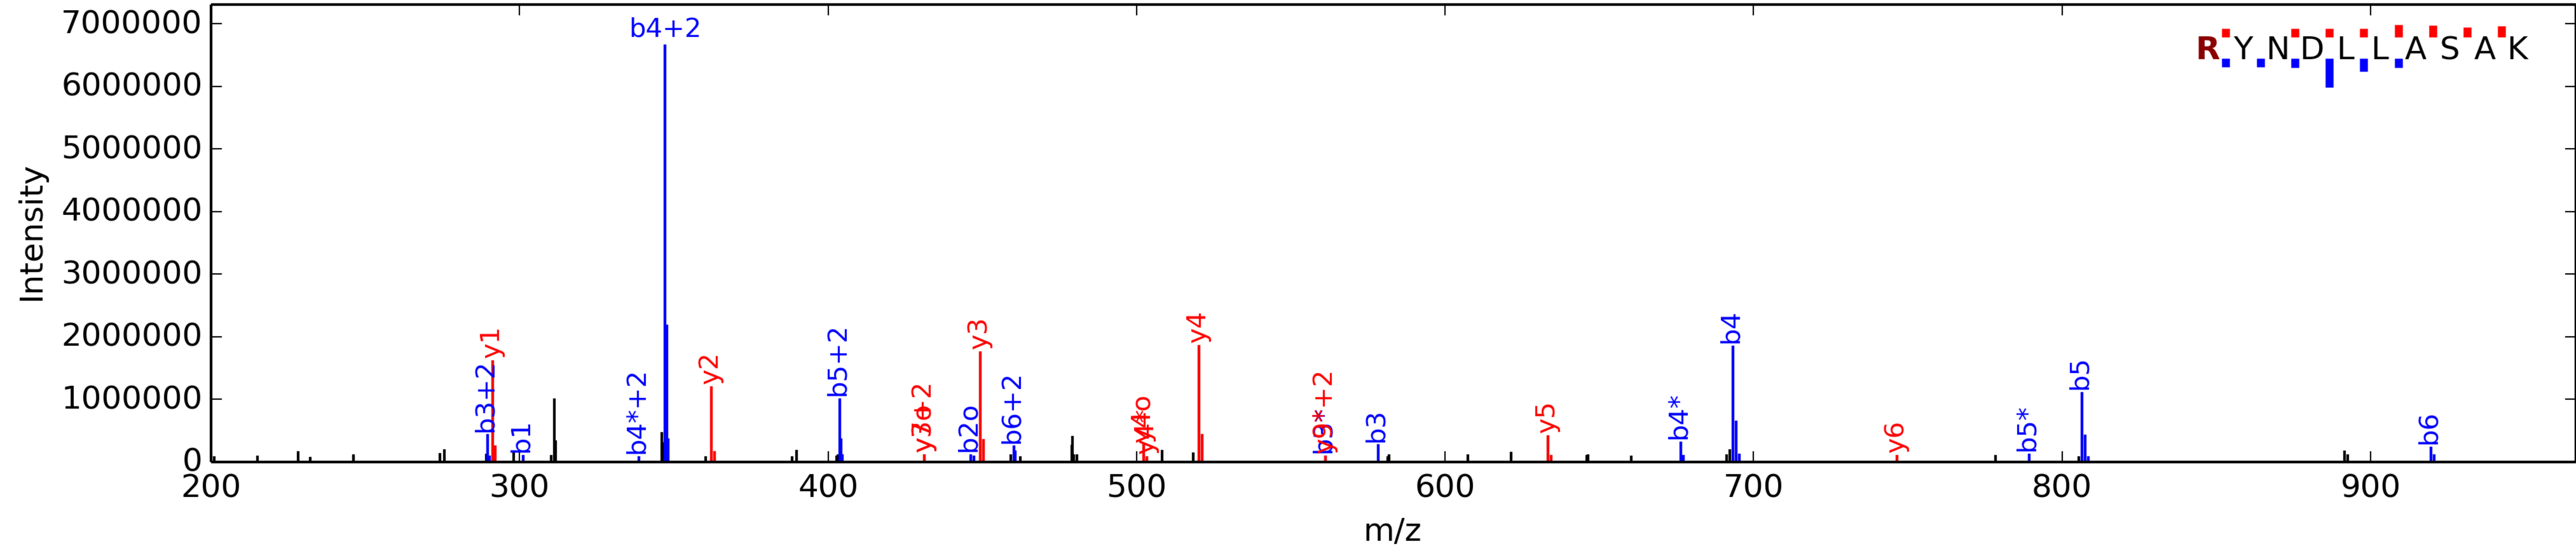

SAAEIVQEIENIEK 144.10207@K14,144.10207@S1, 3+  
m= 1860.0084, matched intensity=84.8%, largest gap=0, sum gaps=0, gap at Q7=0  
CompRef\_P5-25\_P5-19\_P6-85\_P6-58\_W\_BI\_20130717\_f24, scan:32360

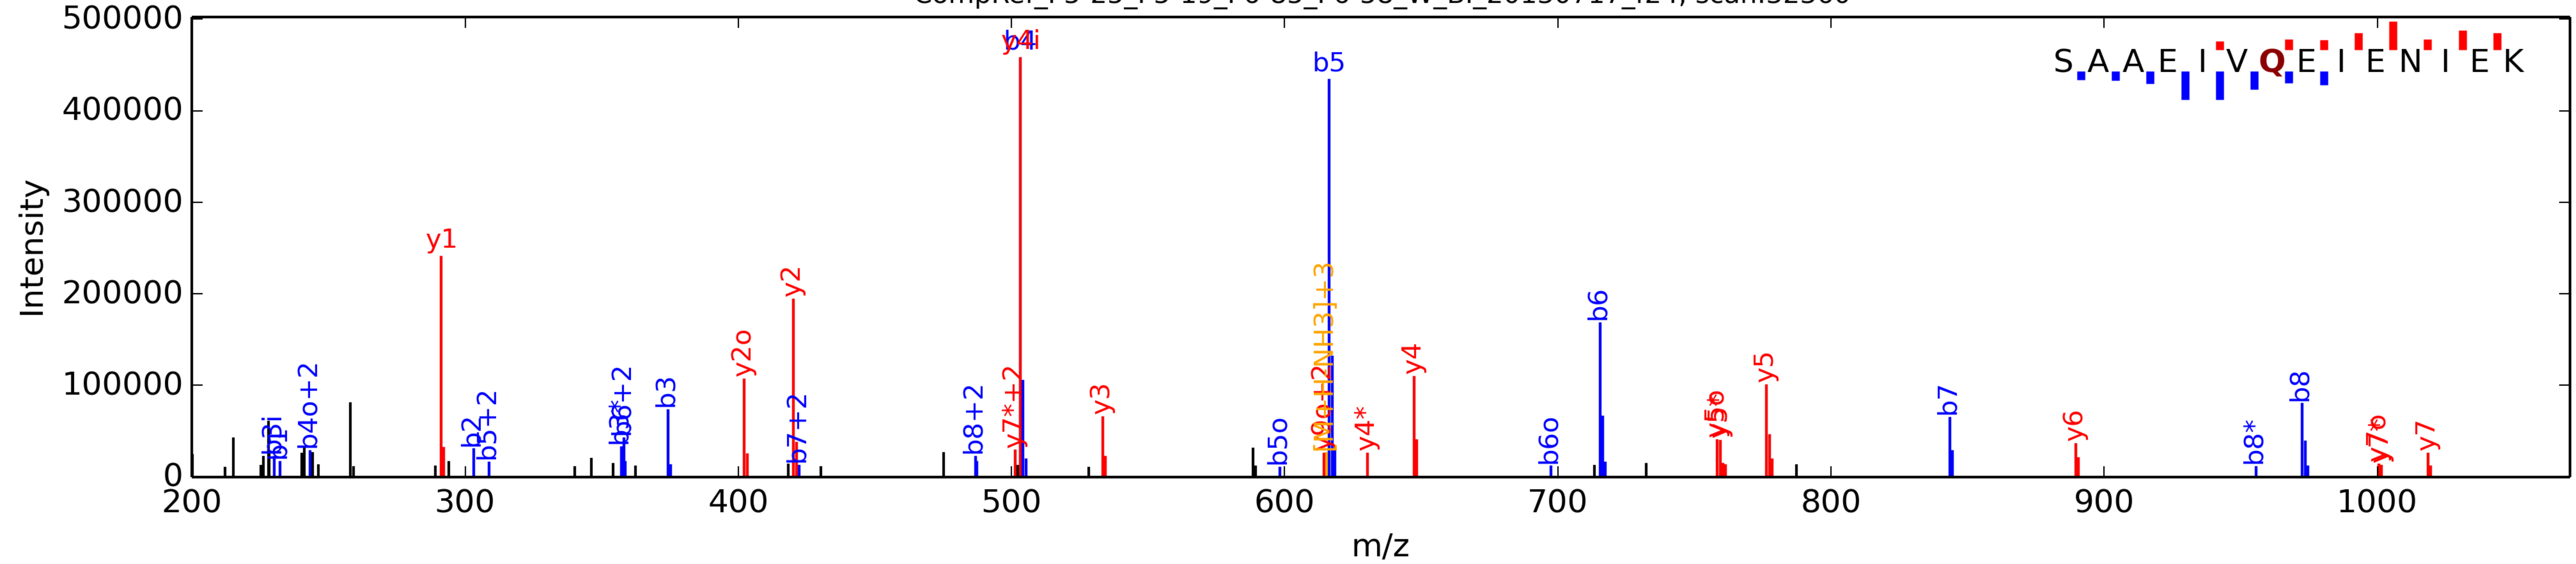

SAASCAPISLPAAASR 57.02200@C5,144.10207@S1, 3+  
m= 1672.8694, matched intensity=59.4%, largest gap=0, sum gaps=0, gap at A6=0  
CompRef\_P5-65\_P6-20\_P5-71\_P6-62\_W\_BI\_20131120\_f09, scan:19382

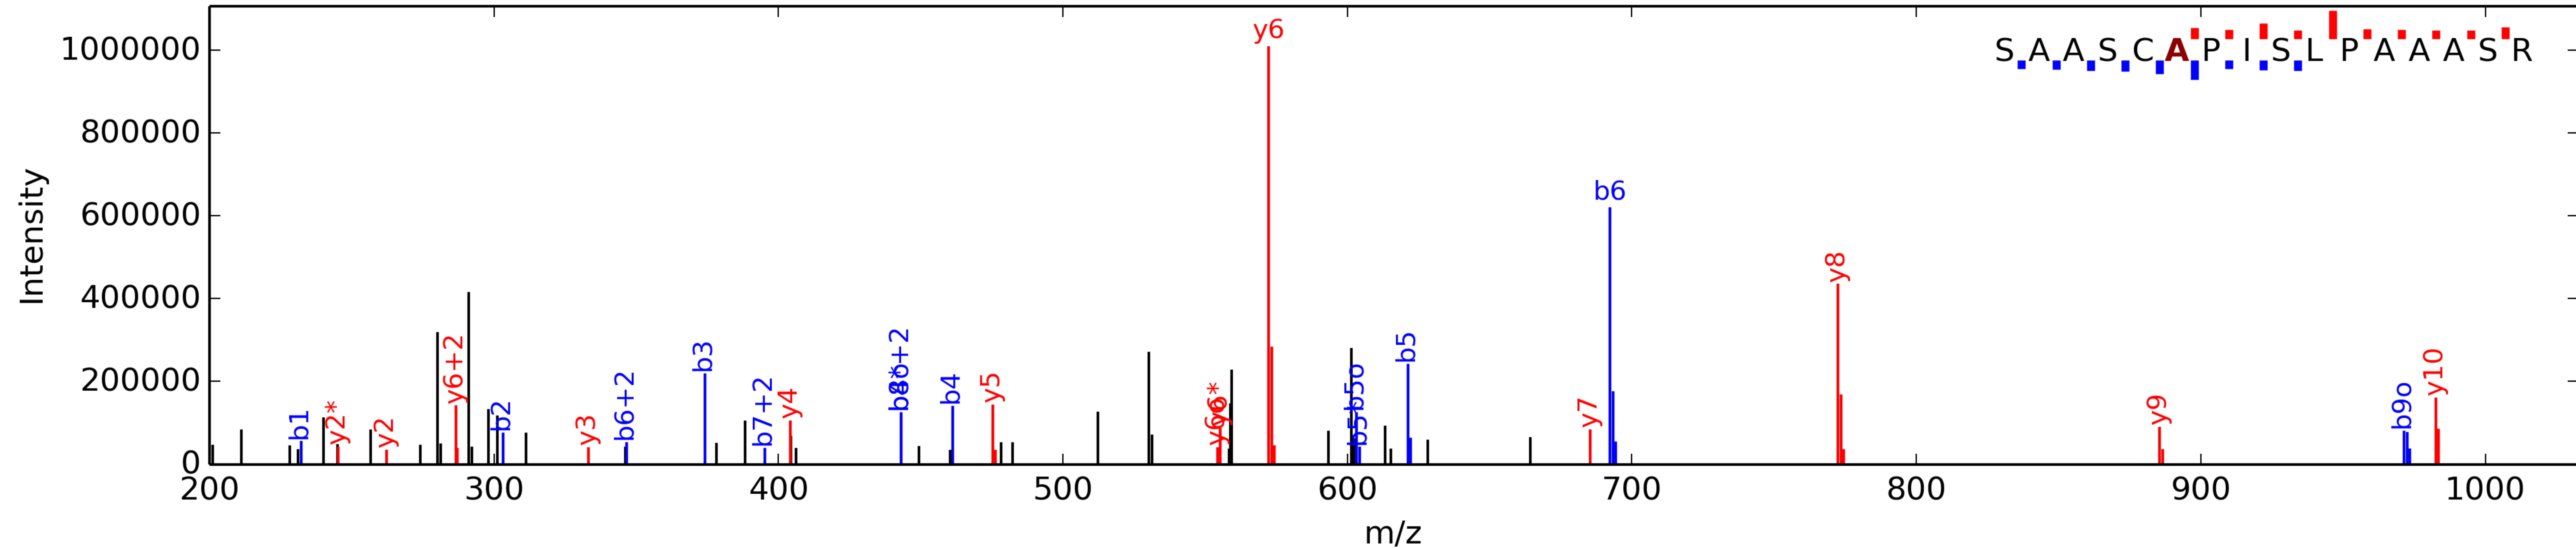



SADFEGLYQE 144.10207@S1, 2+

m= 1301.5898, matched intensity=62.1%, largest gap=0, sum gaps=0, gap at D3=0

CompRef\_2B\_P5-29\_P5-61\_P6-34\_P6-38\_W\_BI\_20130503\_H-JQ\_f13, scan:21600

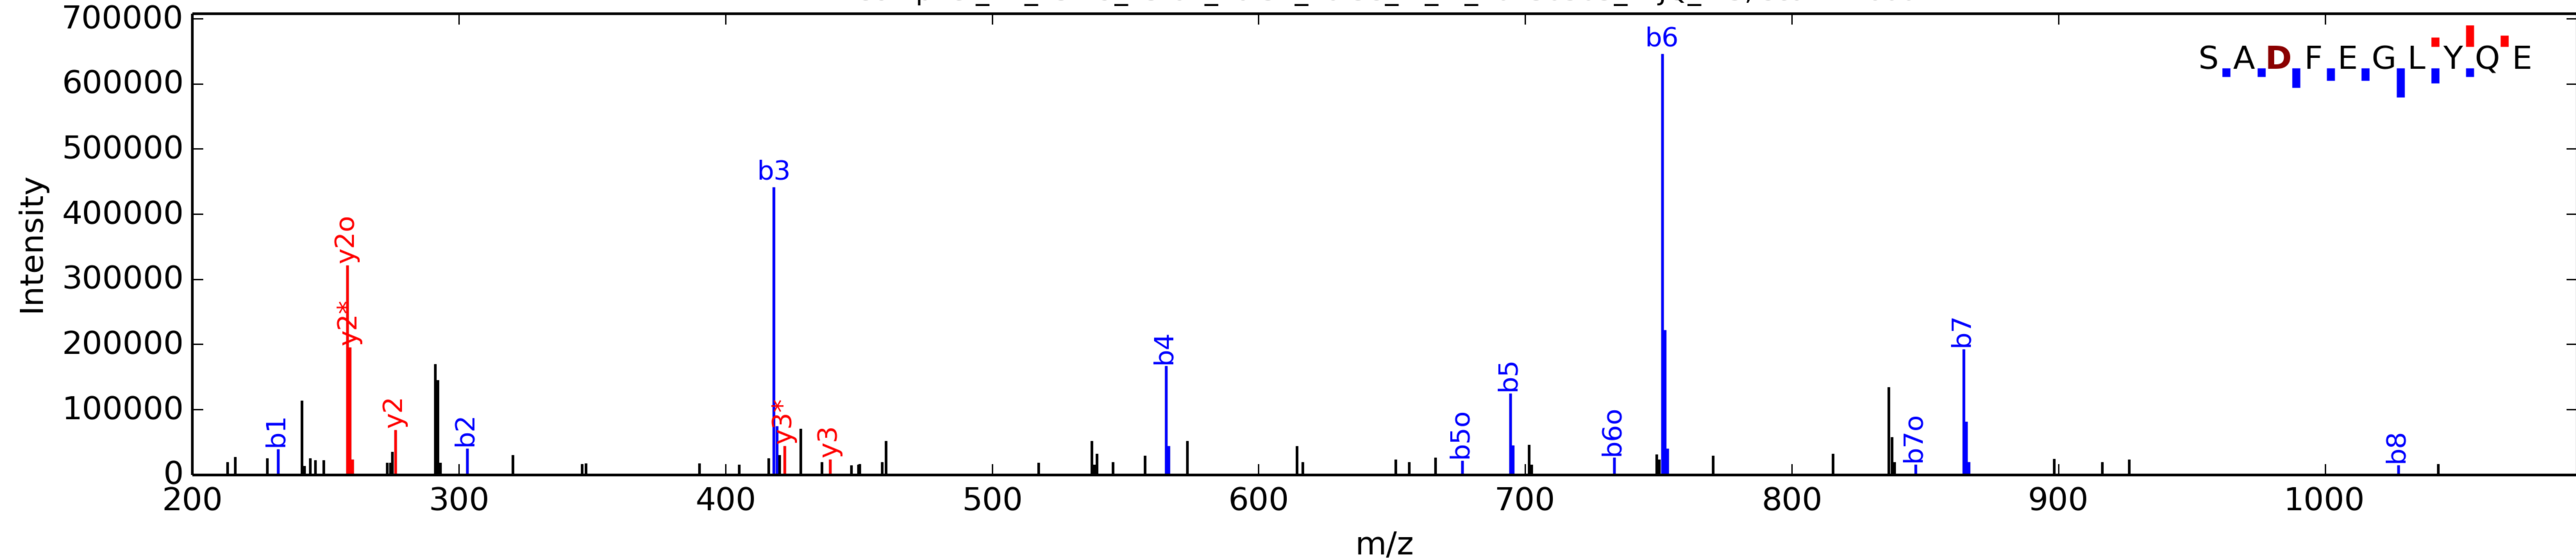

SAEVIAQSR 144.10207@S1, 2+  
m= 1103.6057, matched intensity=58.5%, largest gap=0, sum gaps=0, gap at S8=0  
CompRef\_P5-25\_P5-19\_P6-85\_P6-58\_W\_BI\_20130717\_f16, scan:6261

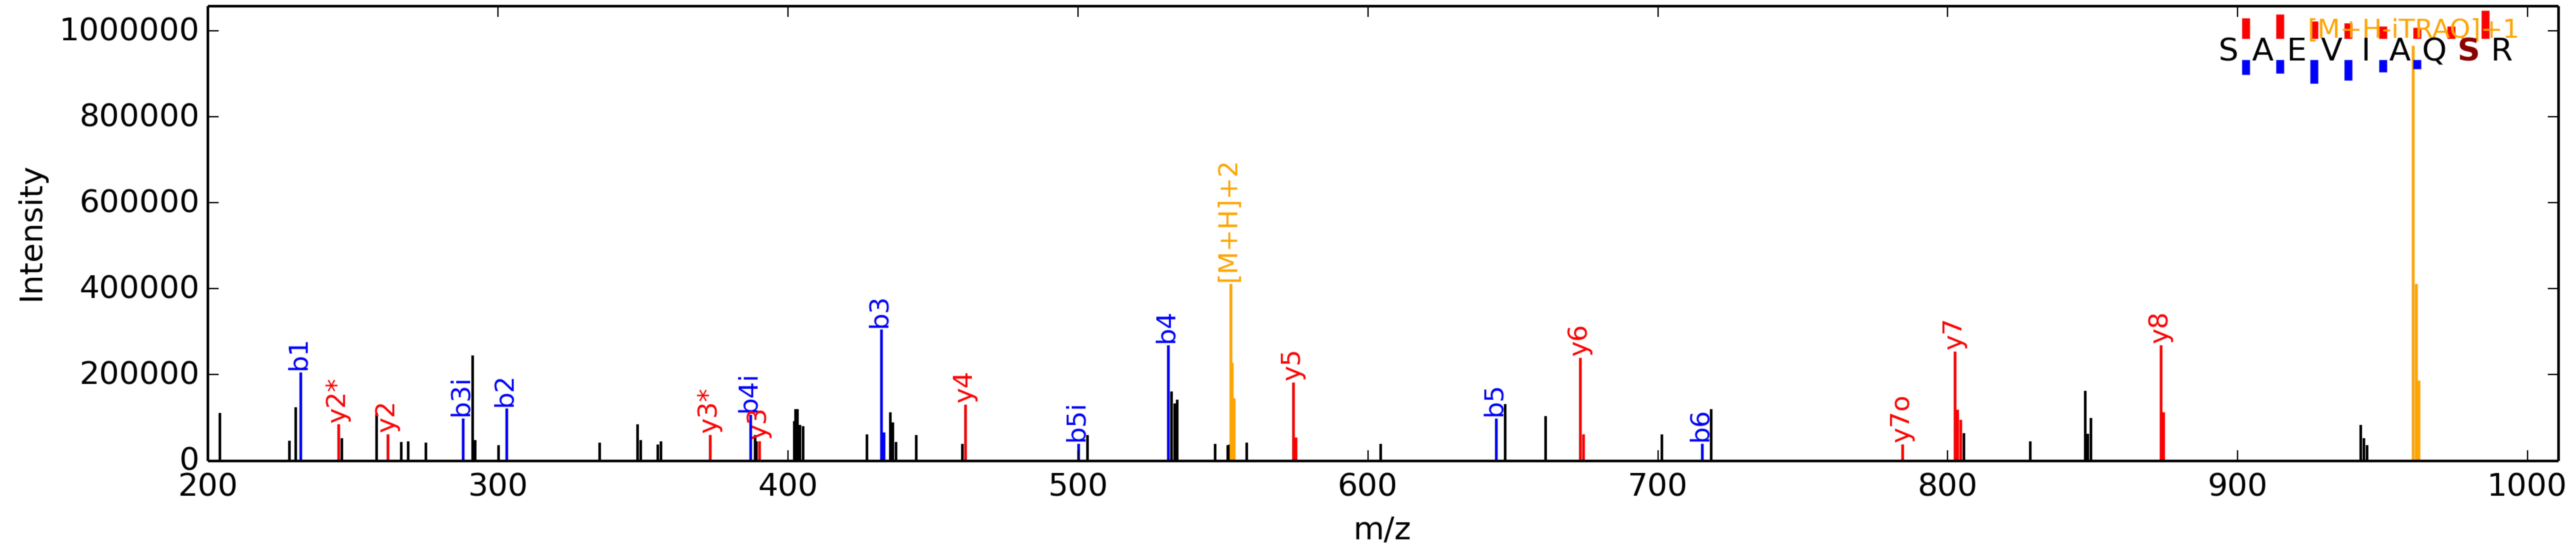

SAGLAPDCEASATAETTVSSVGTCEAAK 57.02200@C8,57.02200@C24,144.10207@K29,144.10207@S1, 3+  
 m= 3099.4591, matched intensity=78.0%, largest gap=1, sum gaps=3, gap at A28=0  
 CompRef\_2B\_P5-29\_P5-61\_P6-34\_P6-38\_P\_BI\_20130510\_H-JQ\_f06, scan:19325

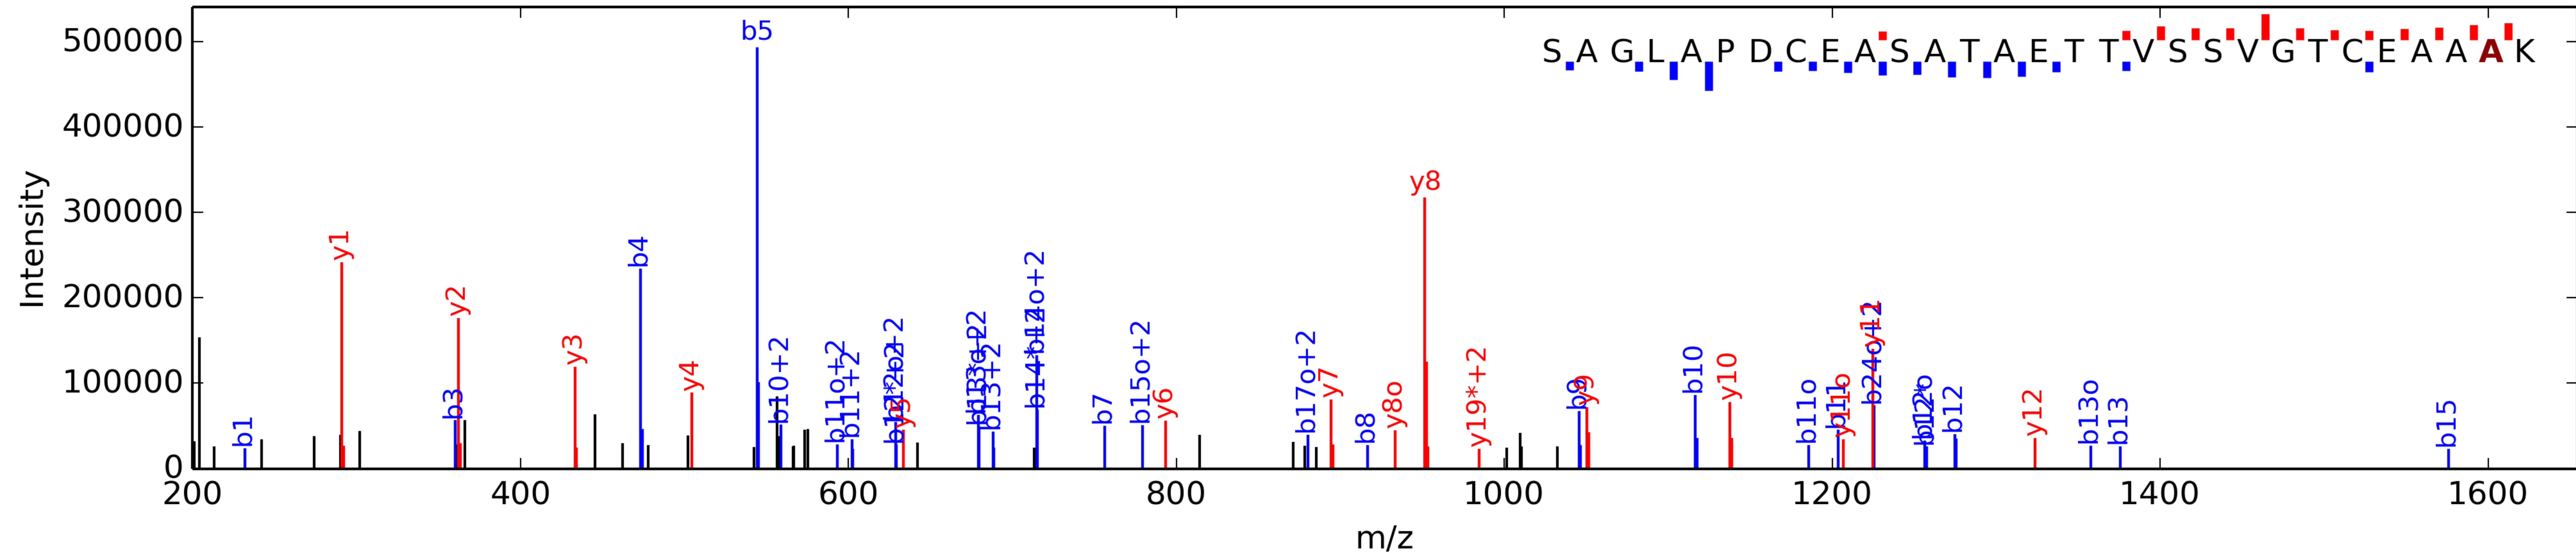



SAPEVTAPGAPAYCVLMEQLTSVSEELDVR 57.02200@C14,144.10207@S1, 3+  
m= 3362.6501, matched intensity=79.1%, largest gap=2, sum gaps=6, gap at C14=1  
TCGA\_CompRef\_W\_PNNL\_B2S7\_f17, scan:15835

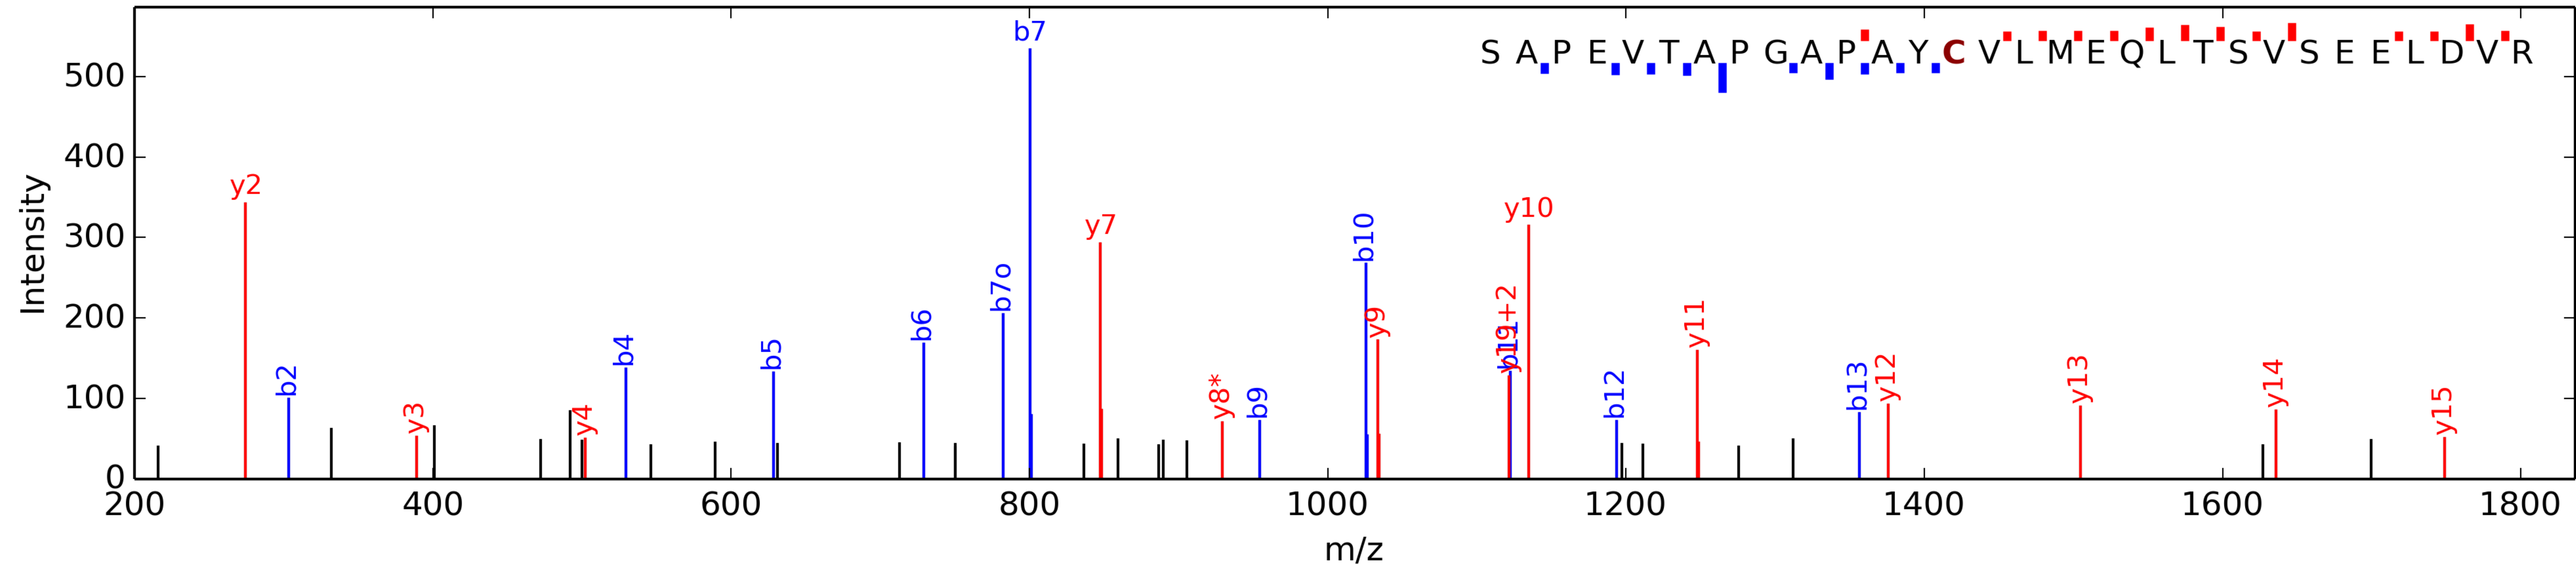

SCEESADAPVDQNSVVIPAAAK 57.02200@C2,144.10207@K22,144.10207@S1, 3+  
m= 2545.2579, matched intensity=81.4%, largest gap=0, sum gaps=0, gap at C2=0  
CPTAC\_CompRef\_test\_X\_iTRAQ\_02\_10Jan13\_Lynx\_12-11-07, scan:4499

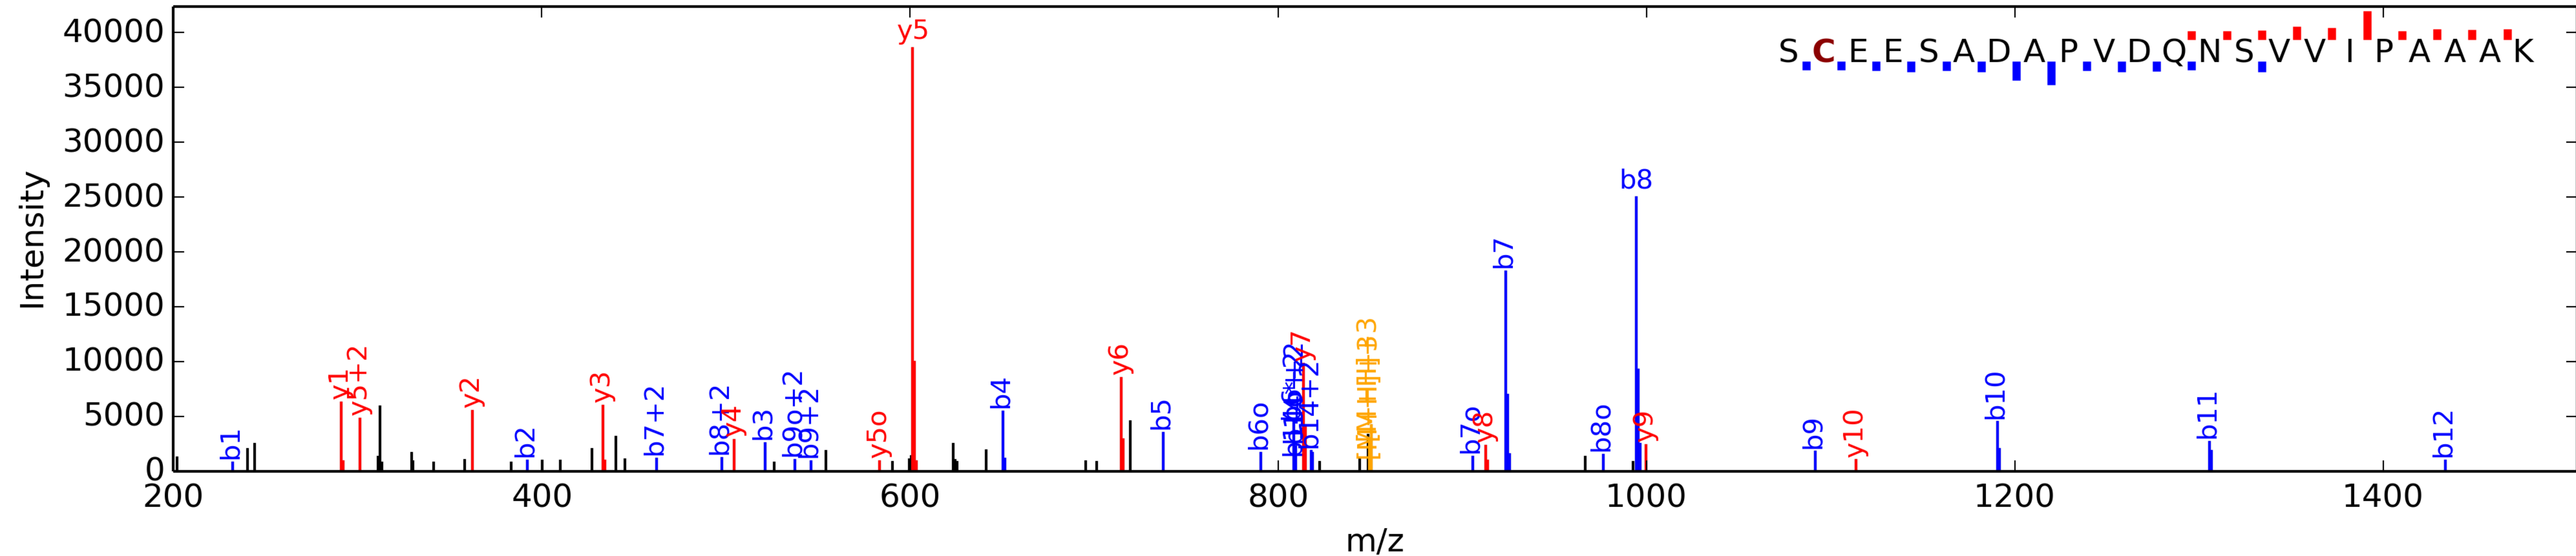

SDEEGQAPR 144.10207@S1, 2+  
m= 1131.5278, matched intensity=68.0%, largest gap=0, sum gaps=0, gap at P8=0  
H20120605\_JQ\_CPTAC2\_Compref4\_protfxnA, scan:2915

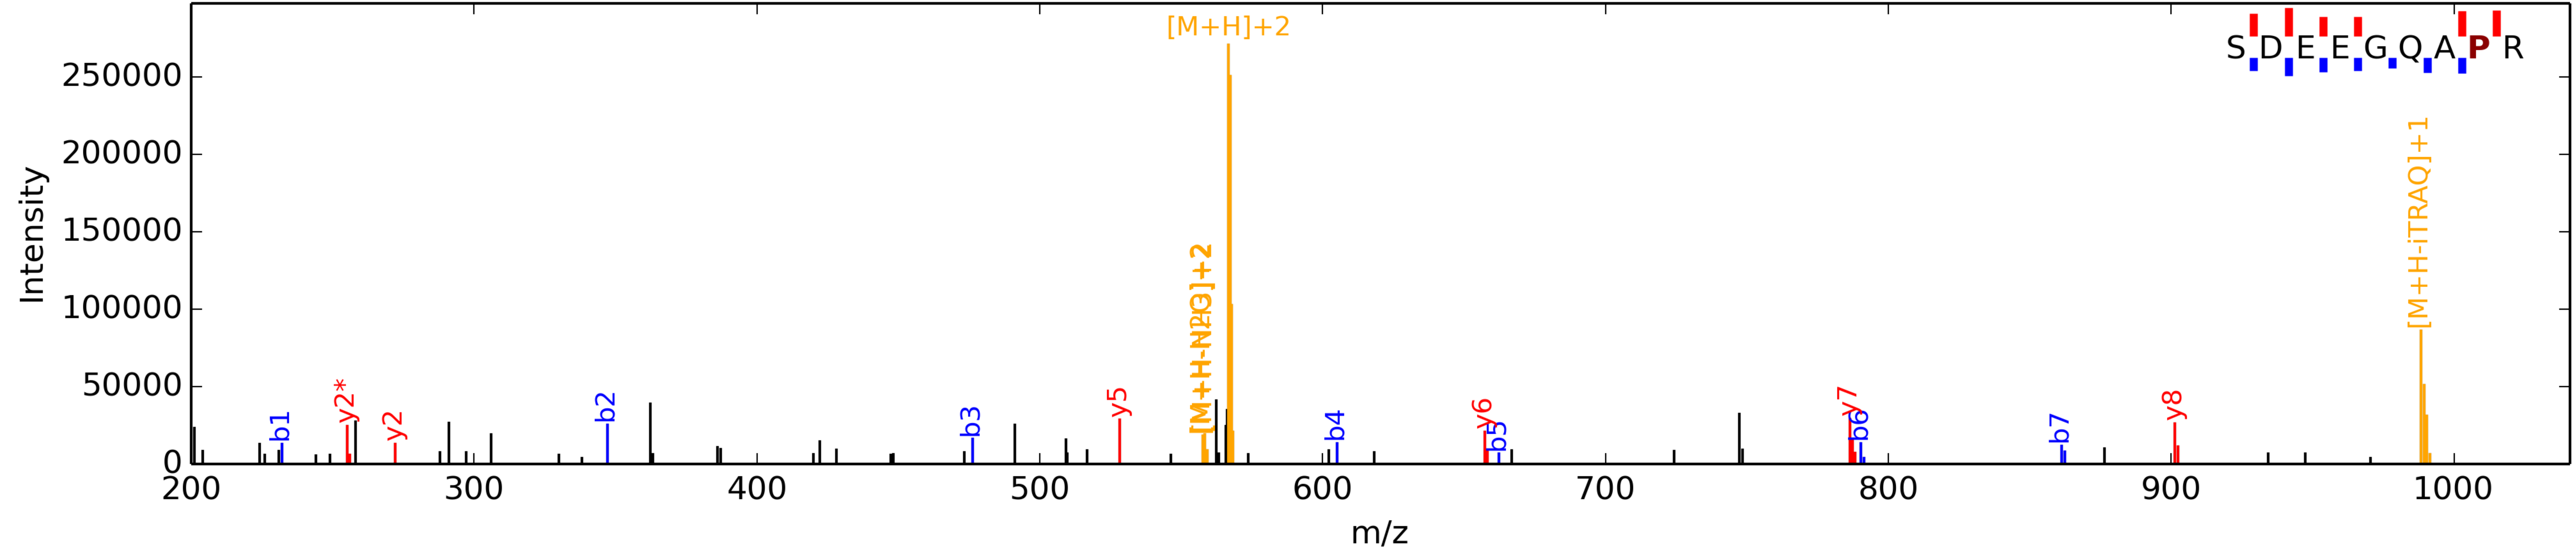



SDINVTVLIGCK 57.02200@C11,144.10207@K12,144.10207@S1, 3+  
m= 1605.9009, matched intensity=84.1%, largest gap=0, sum gaps=0, gap at C11=0  
CompRef\_P5-65\_P6-20\_P5-71\_P6-62\_W\_BI\_20131120\_f15, scan:26448

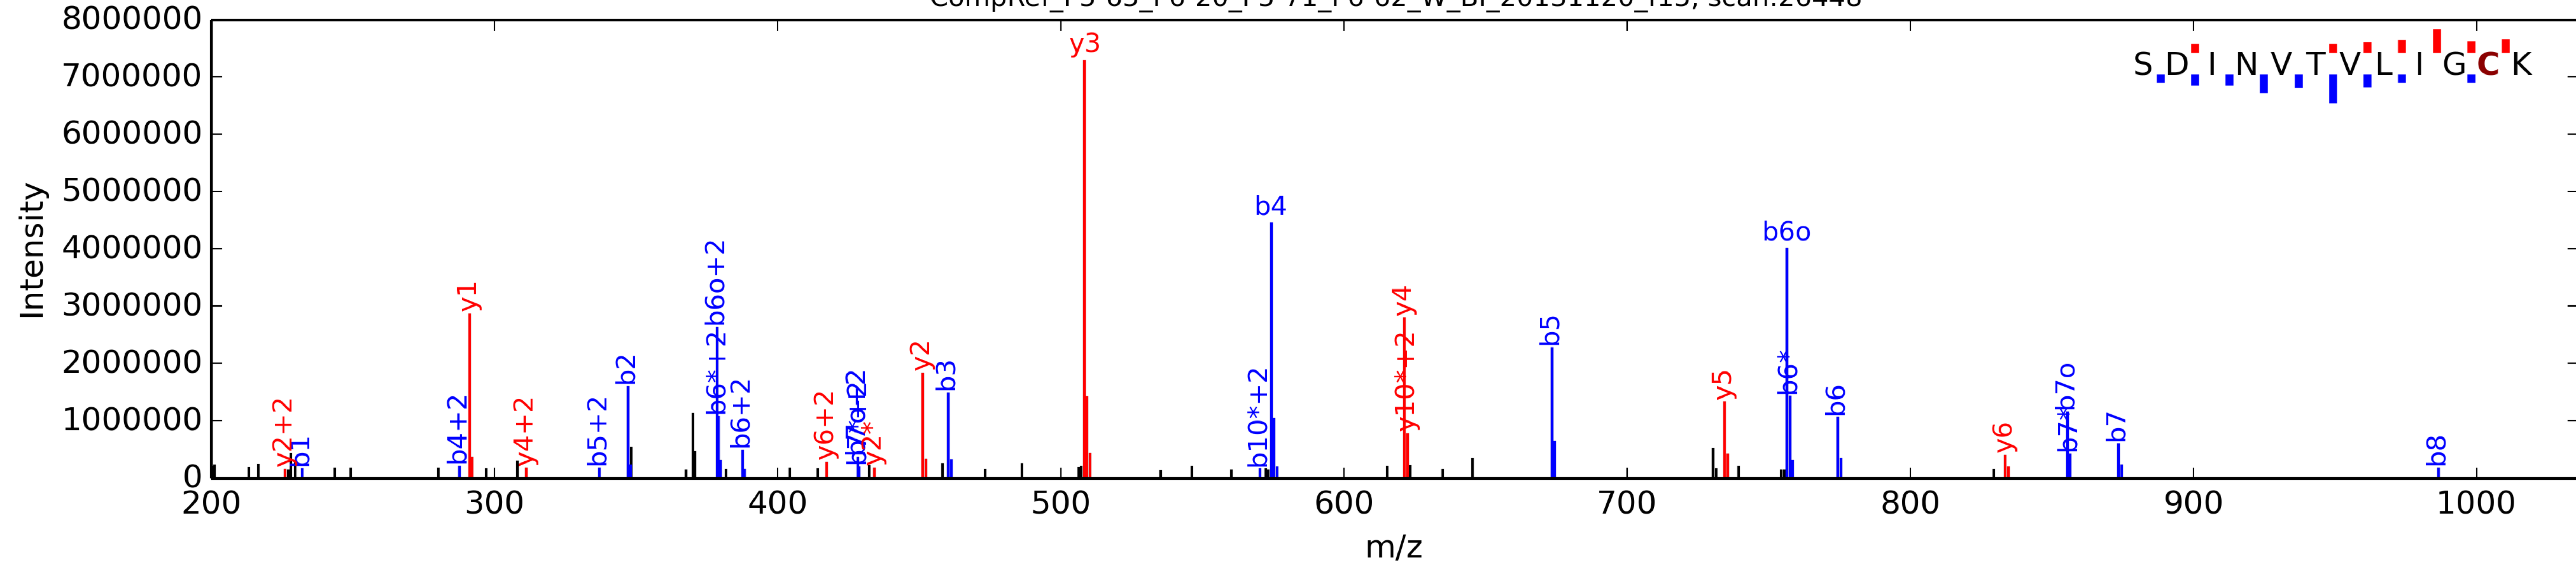

SDQSCEIMLNHLATAR 57.02200@C5,144.10207@S1, 3+  
m= 1988.9535, matched intensity=50.6%, largest gap=0, sum gaps=0, gap at S1=0  
CompRef\_P5-91\_P6-74\_P5-100\_P6-108\_W\_BI\_20131004\_f07, scan:20682

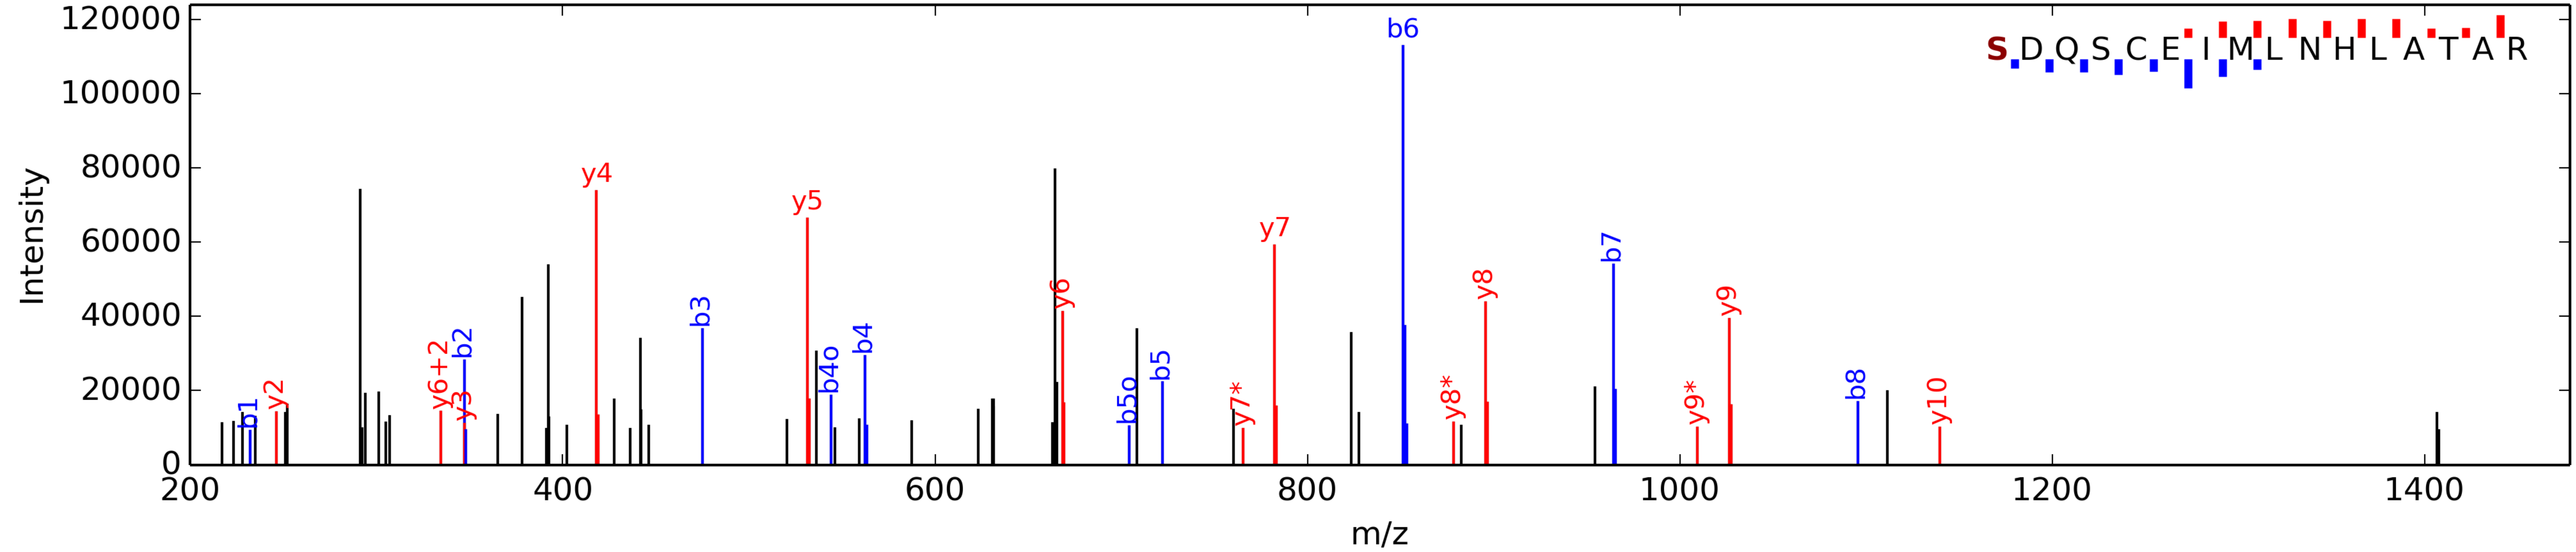





SDSELNNEVAARK 144.10207@K13,144.10207@S1, 3+  
m= 1719.8995, matched intensity=81.8%, largest gap=1, sum gaps=1, gap at N7=0  
CompRef\_2B\_P5-29\_P5-61\_P6-34\_P6-38\_W\_BI\_20130503\_H-JQ\_f12, scan:7611

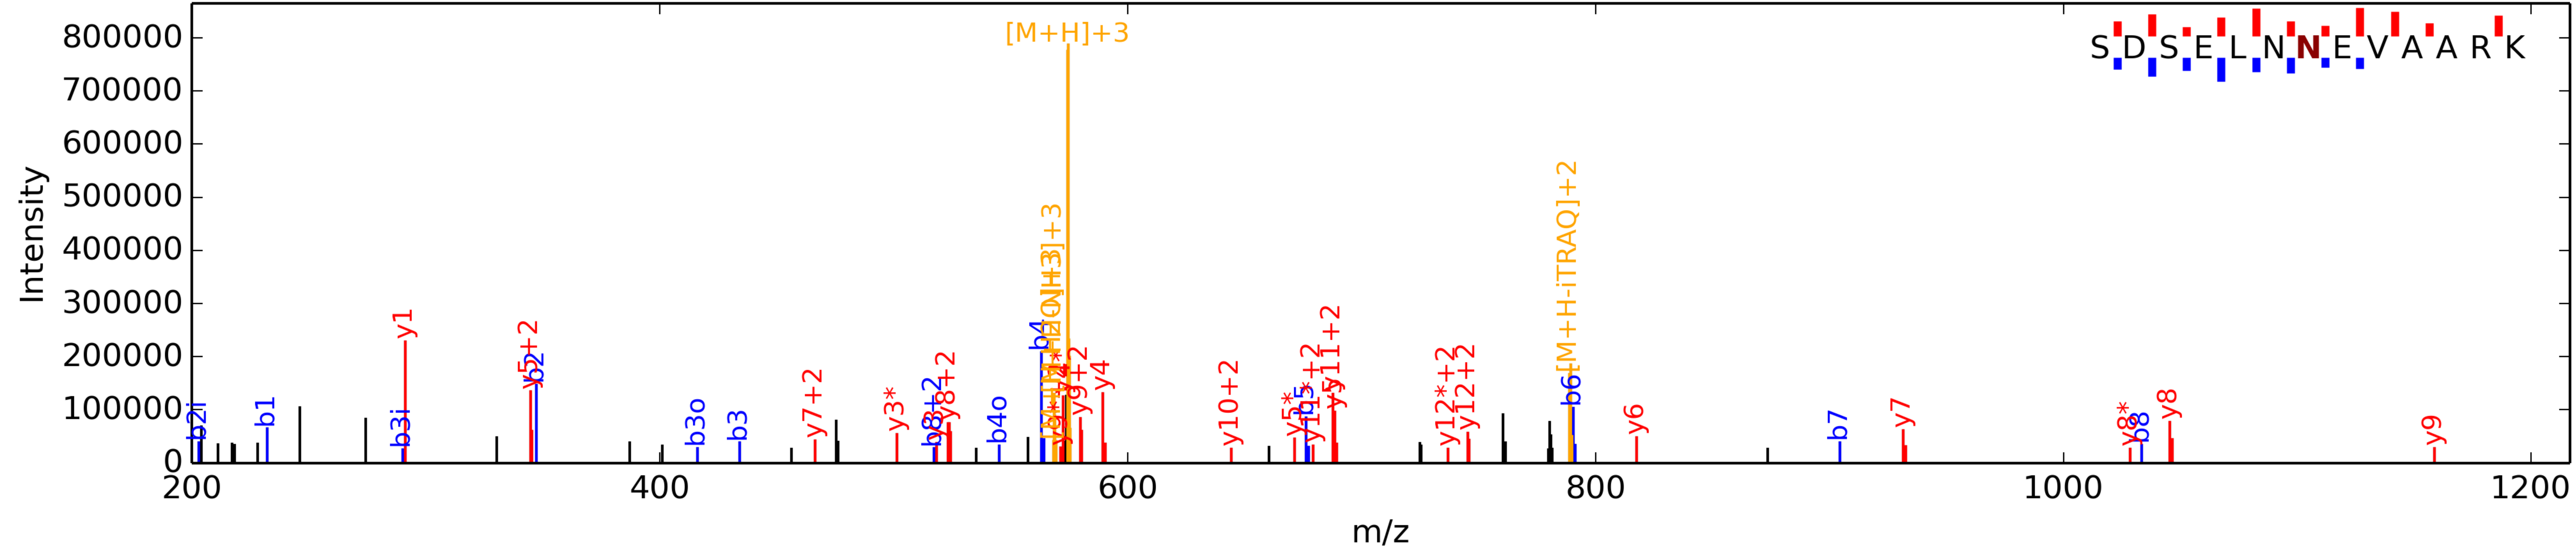

SDVSENLC TPQSR 57.02200@C8,144.10207@S1, 2+  
m= 1763.8236, matched intensity=87.7%, largest gap=0, sum gaps=0, gap at V3=0  
H20130119\_PM\_CompRef\_BC1\_proteome\_fxn14, scan:10369

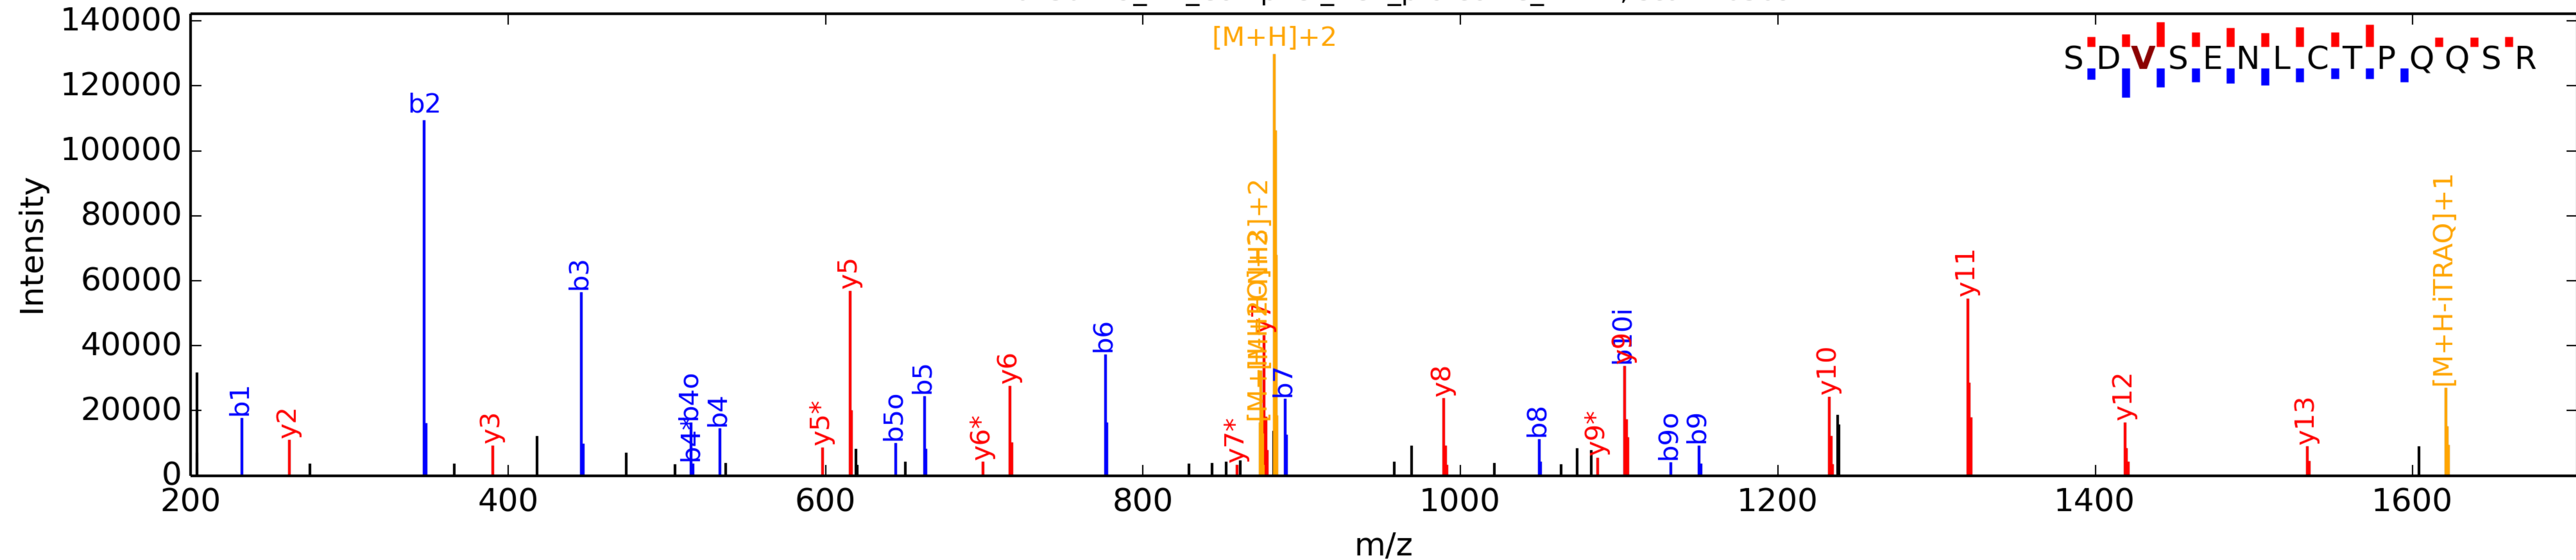

SEALPTDLPSPAPDLTEPK 144.10207@K20,144.10207@S1, 3+  
m= 2366.2461, matched intensity=68.5%, largest gap=1, sum gaps=4, gap at T10=1  
TCGA\_CompRef\_W\_PNNL\_B1S7\_f14, scan:7494

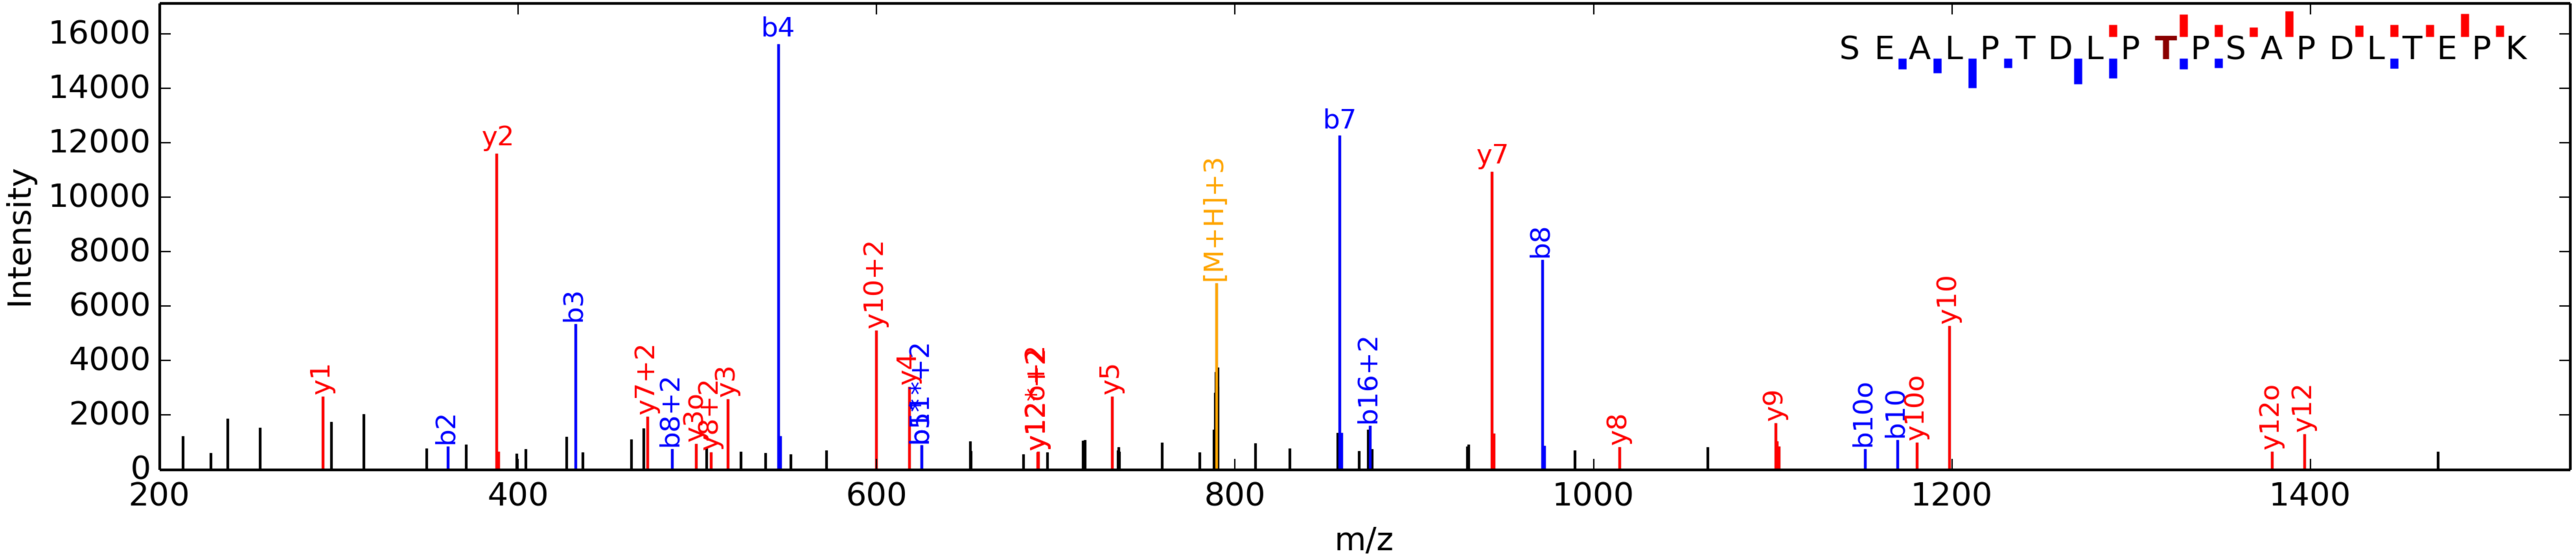



SEANDQGPPREDGVTR 144.10207@S1, 3+  
 m= 1870.8891, matched intensity=92.7%, largest gap=0, sum gaps=0, gap at R10=0  
 A120511\_CotterR\_TS\_fraction4, scan:1540

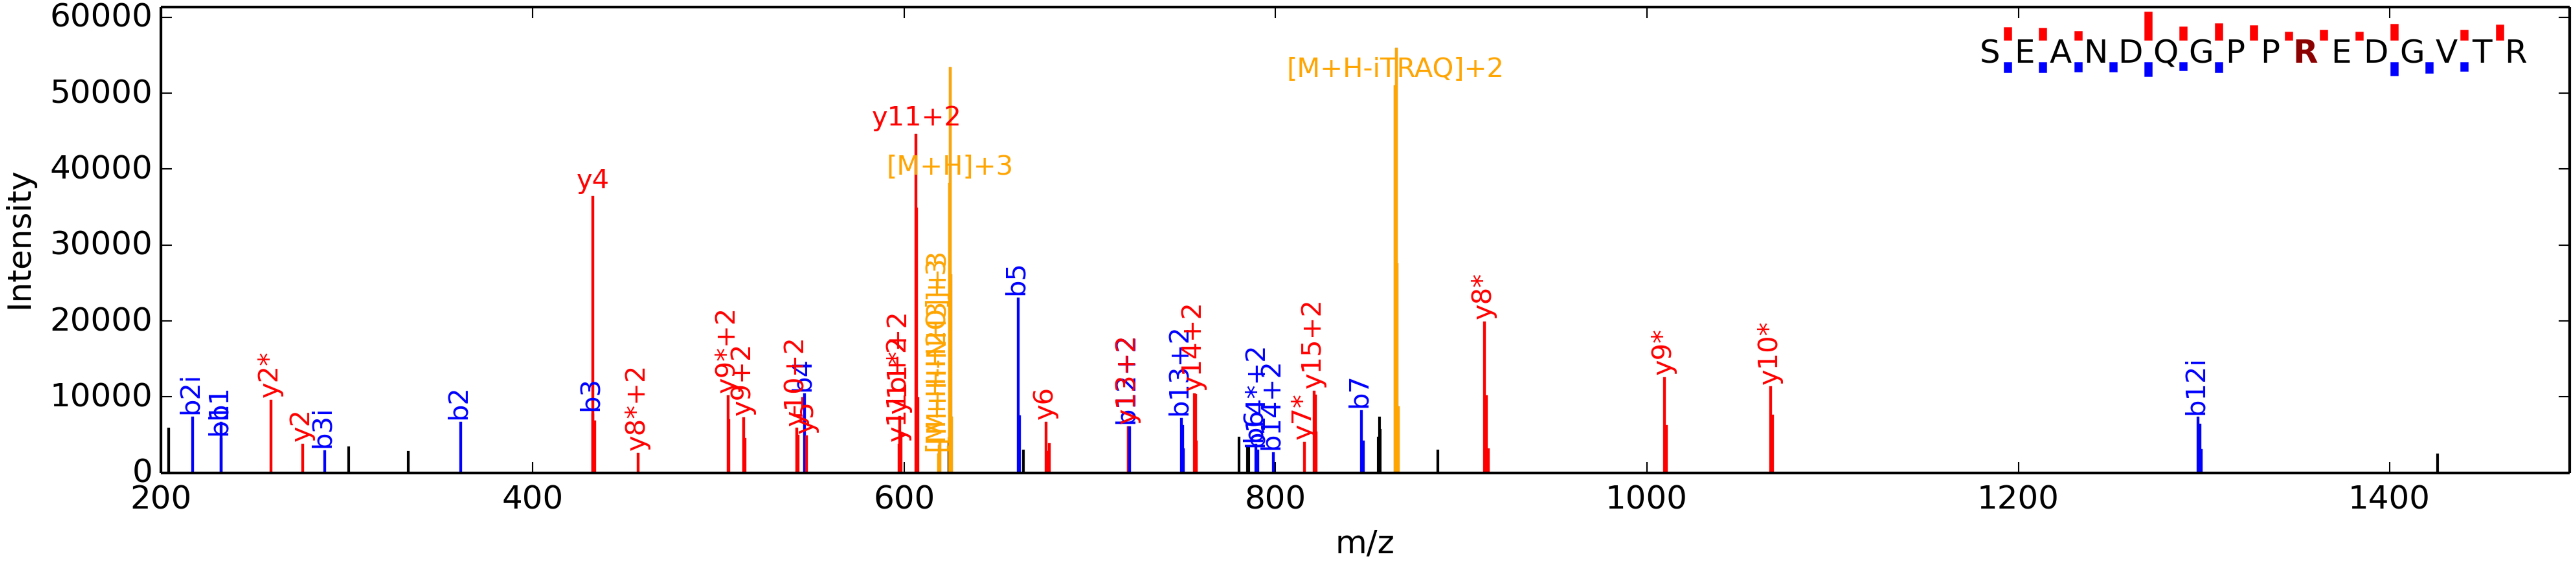

SEDYEQAAHIHR 144.10207@S1, 3+  
m= 1669.7930, matched intensity=68.7%, largest gap=0, sum gaps=0, gap at l11=0  
CompRef\_P5-25\_P5-19\_P6-85\_P6-58\_W\_BI\_20130717\_f14, scan:8905

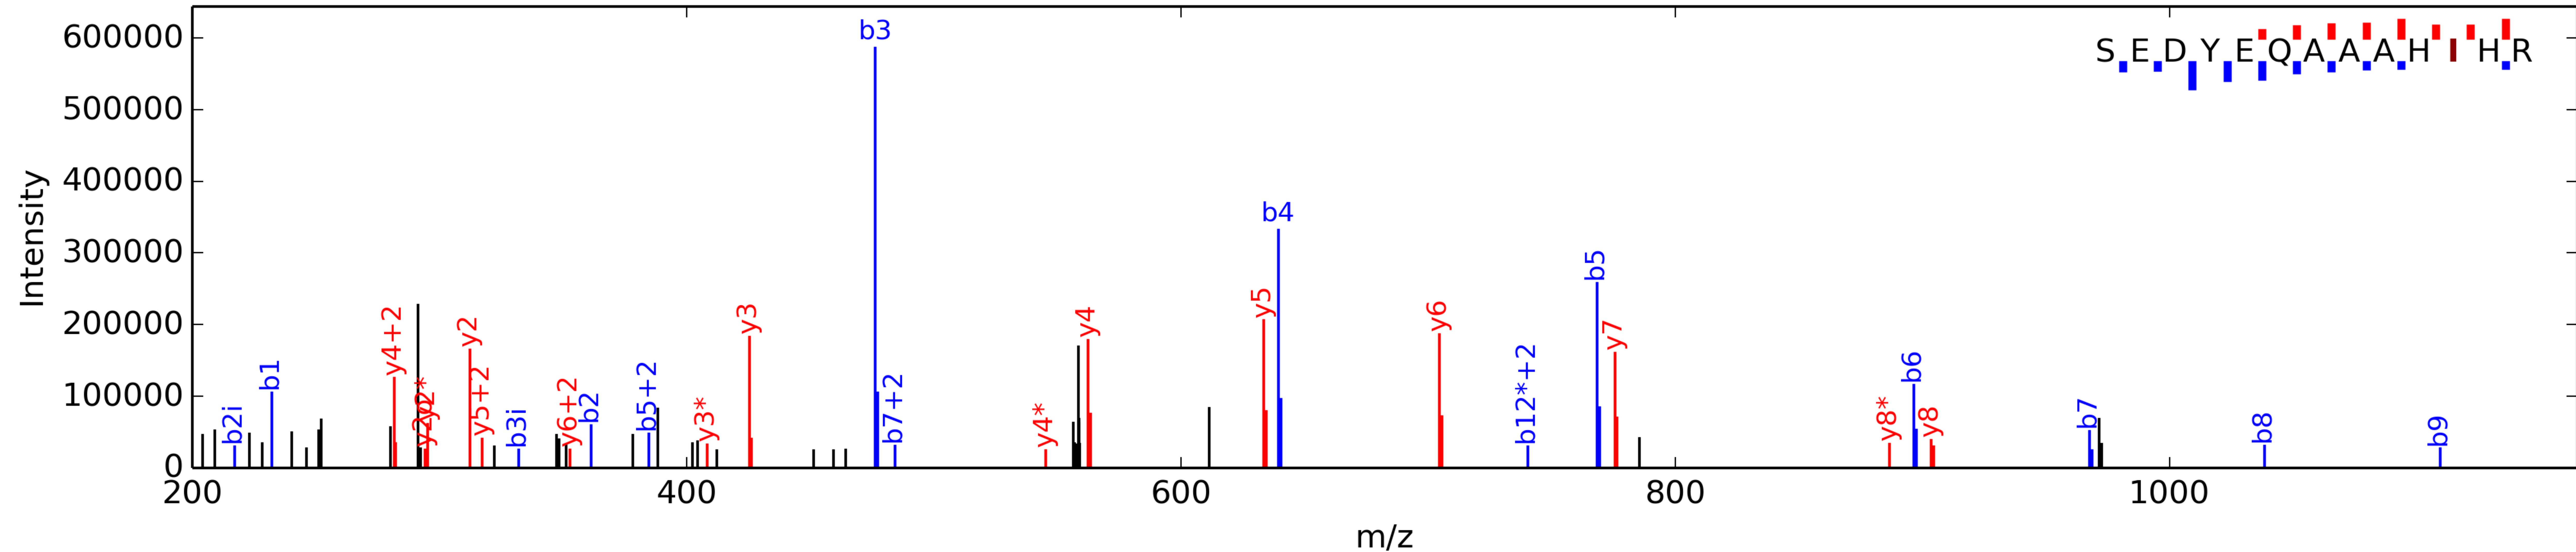

SESSHHCSTEK 57.02200@C7,144.10207@K11,144.10207@S1, 2+  
 m= 1567.7033, matched intensity=84.8%, largest gap=0, sum gaps=0, gap at C7=0  
 CompRef\_P5-25\_P5-19\_P6-85\_P6-58\_W\_BI\_20130717\_f04, scan:2543

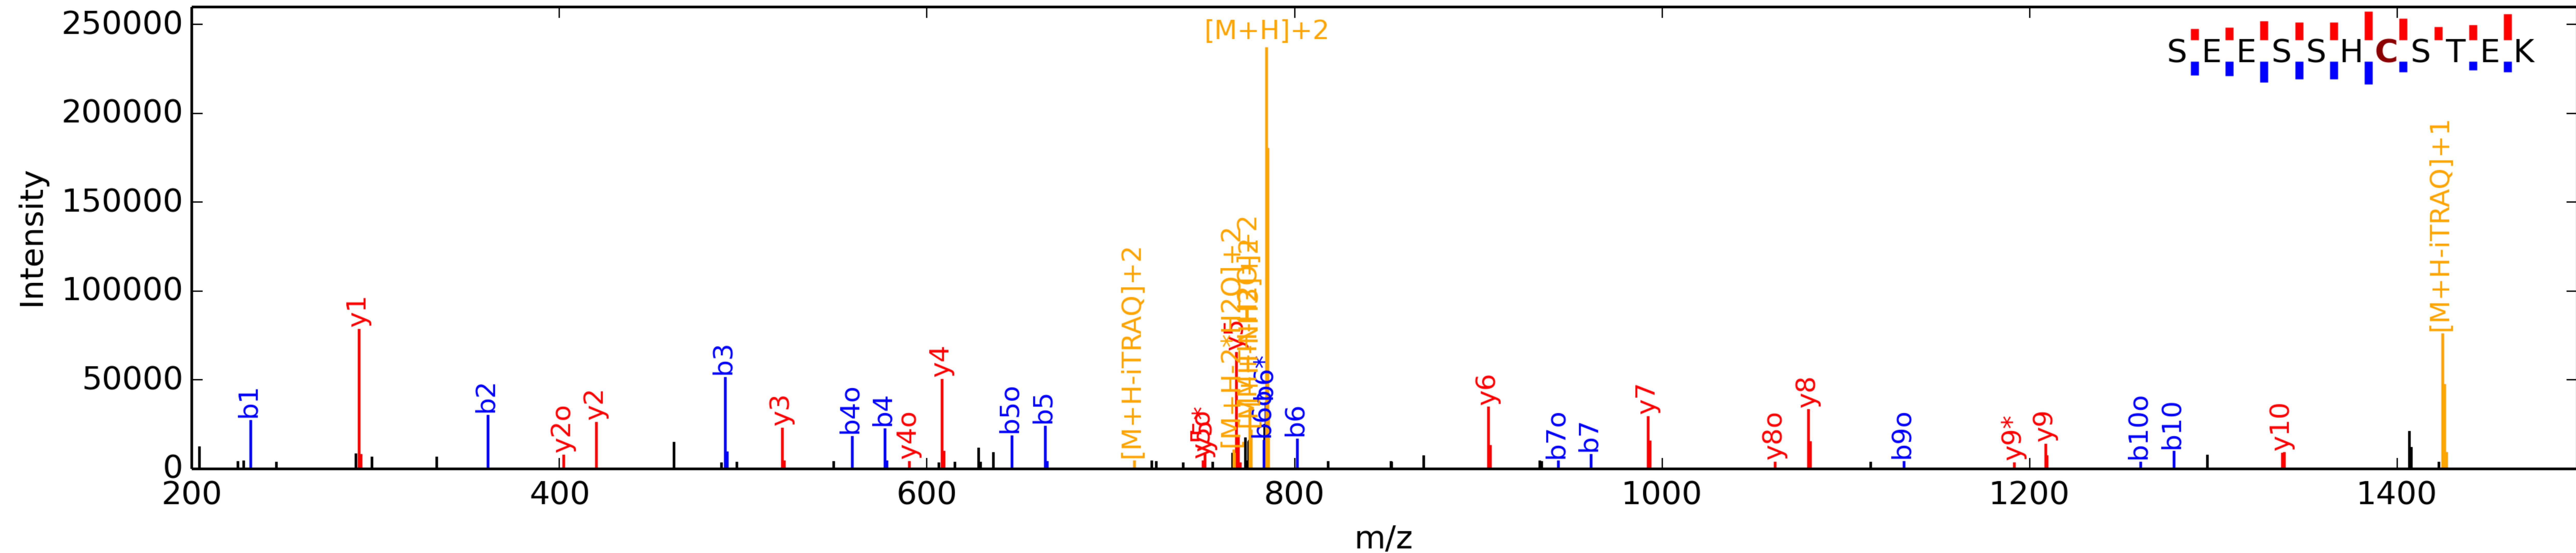



SEIPLQEQNYPAVD 144.10207@S1, 2+  
m= 1745.8594, matched intensity=55.7%, largest gap=1, sum gaps=1, gap at P11=0  
CompRef\_P5-65\_P6-20\_P5-71\_P6-62\_W\_BI\_20131120\_f14, scan:24205

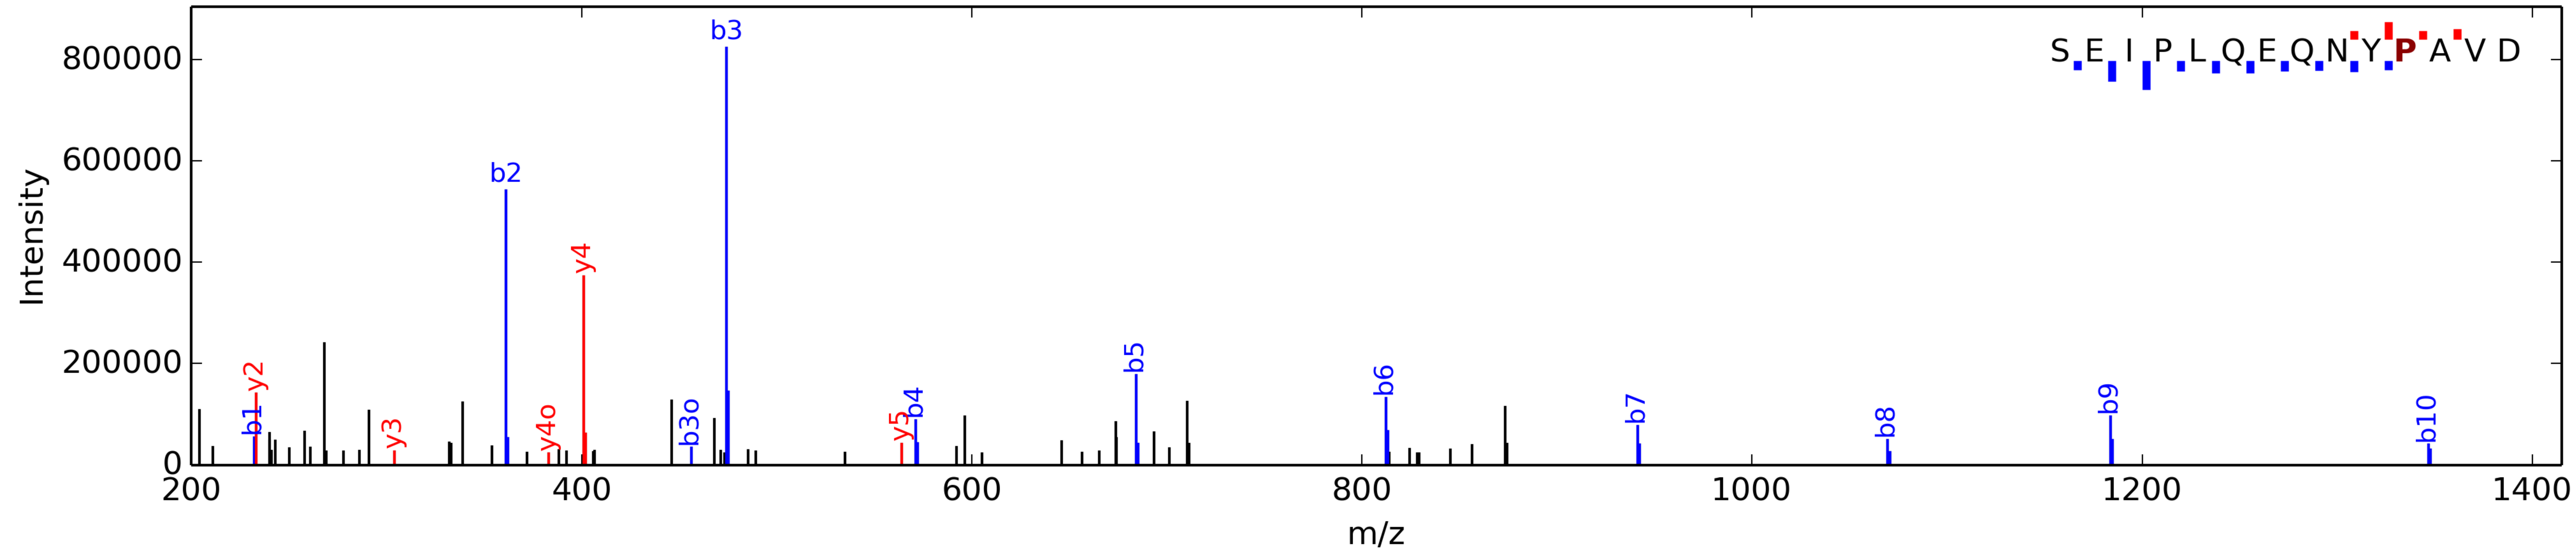

SELLLACVHNYQPCVQR 57.02200@C8,57.02200@C15,144.10207@S1, 3+  
m= 2343.1960, matched intensity=66.8%, largest gap=2, sum gaps=2, gap at E2=0  
CPTAC\_CompRef\_test\_X\_iTRAQ\_02\_10Jan13\_Lynx\_12-11-07, scan:9521

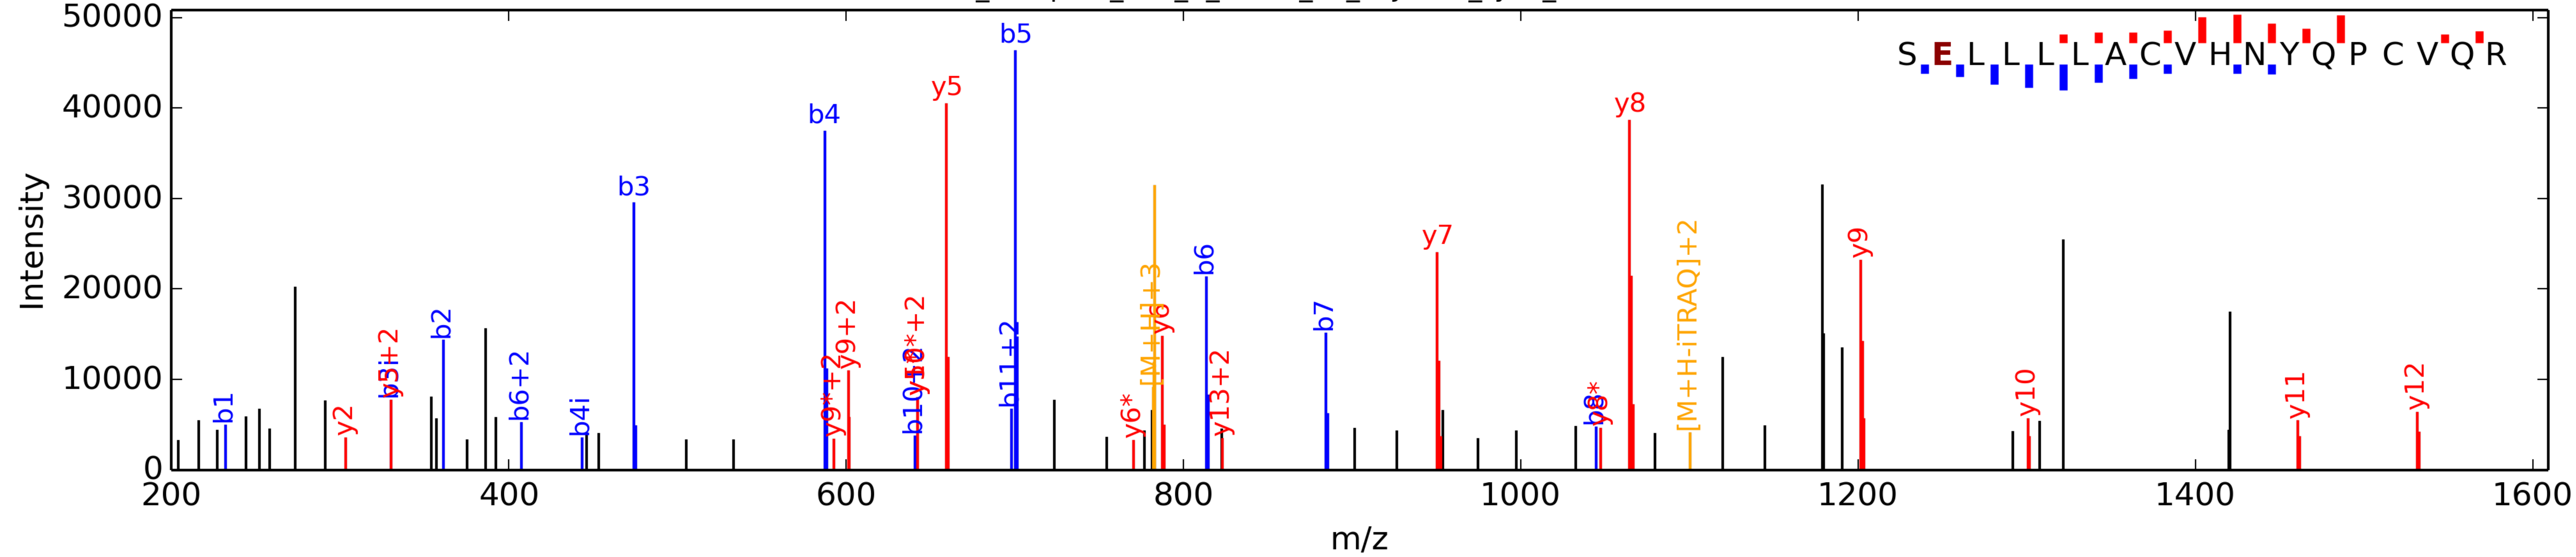

SELGNFEQVIVGMMMPTVLYDVQELR 144.10207@S1, 3+  
m= 3228.5991, matched intensity=74.7%, largest gap=2, sum gaps=3, gap at M16=0  
CPTAC\_CompRef\_00\_iTRAQ\_15\_2Feb12\_Cougar\_11-10-09, scan:16452

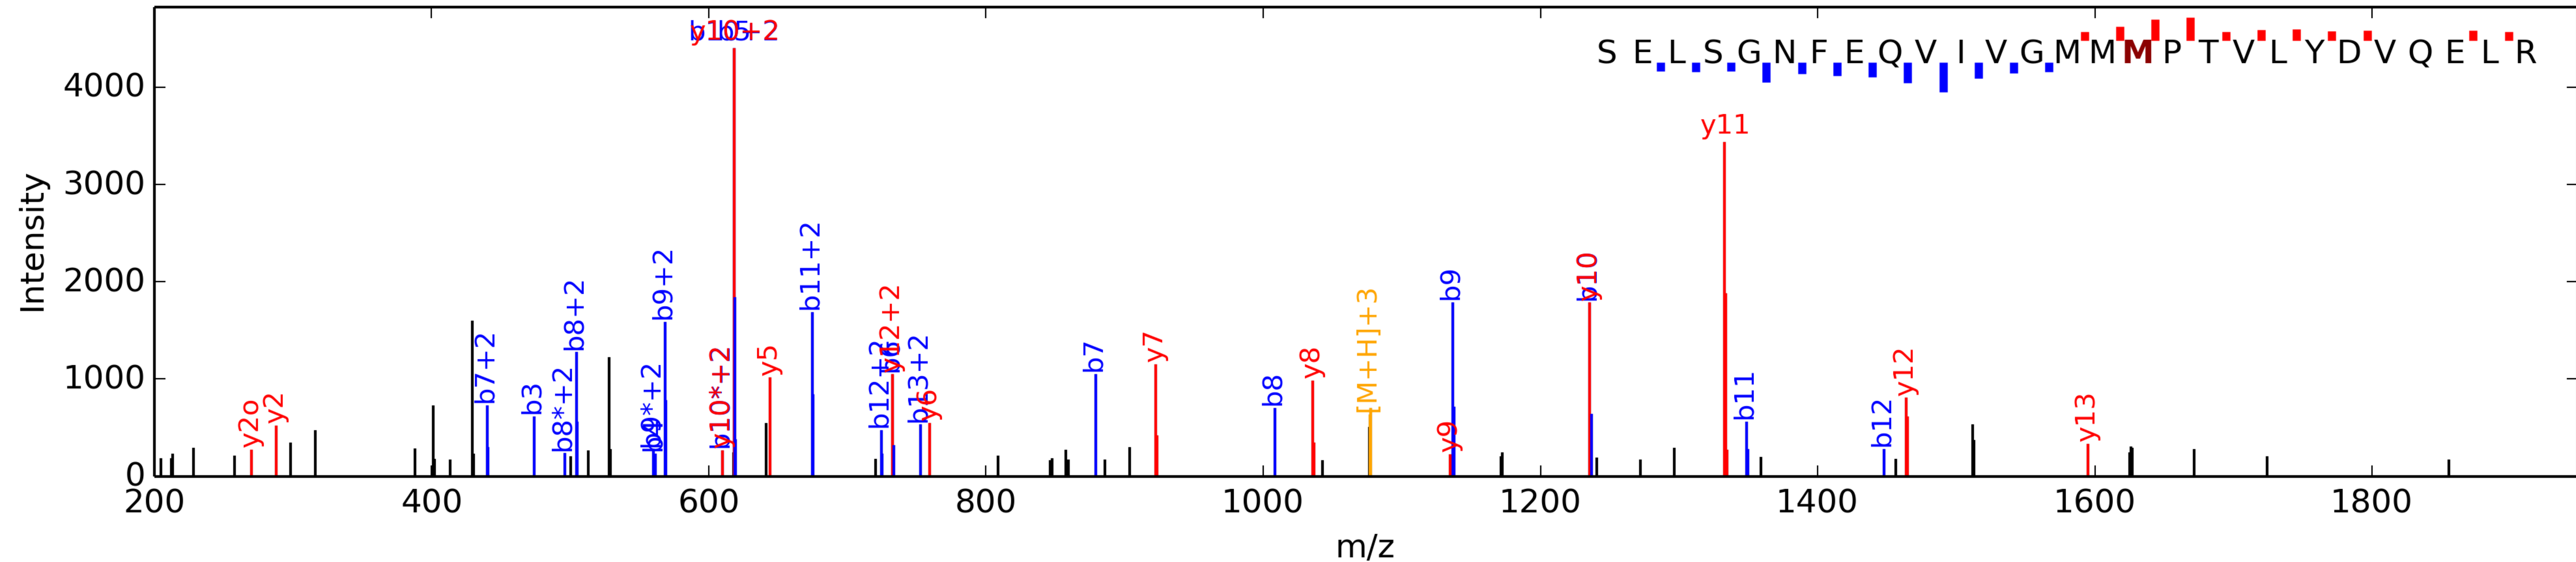



SFGVLAPGK 144.10207@K9,144.10207@S1, 2+  
m= 1162.6954, matched intensity=73.5%, largest gap=0, sum gaps=0, gap at L5=0  
CompRef\_P5-25\_P5-19\_P6-85\_P6-58\_W\_BI\_20130717\_f14, scan:17765

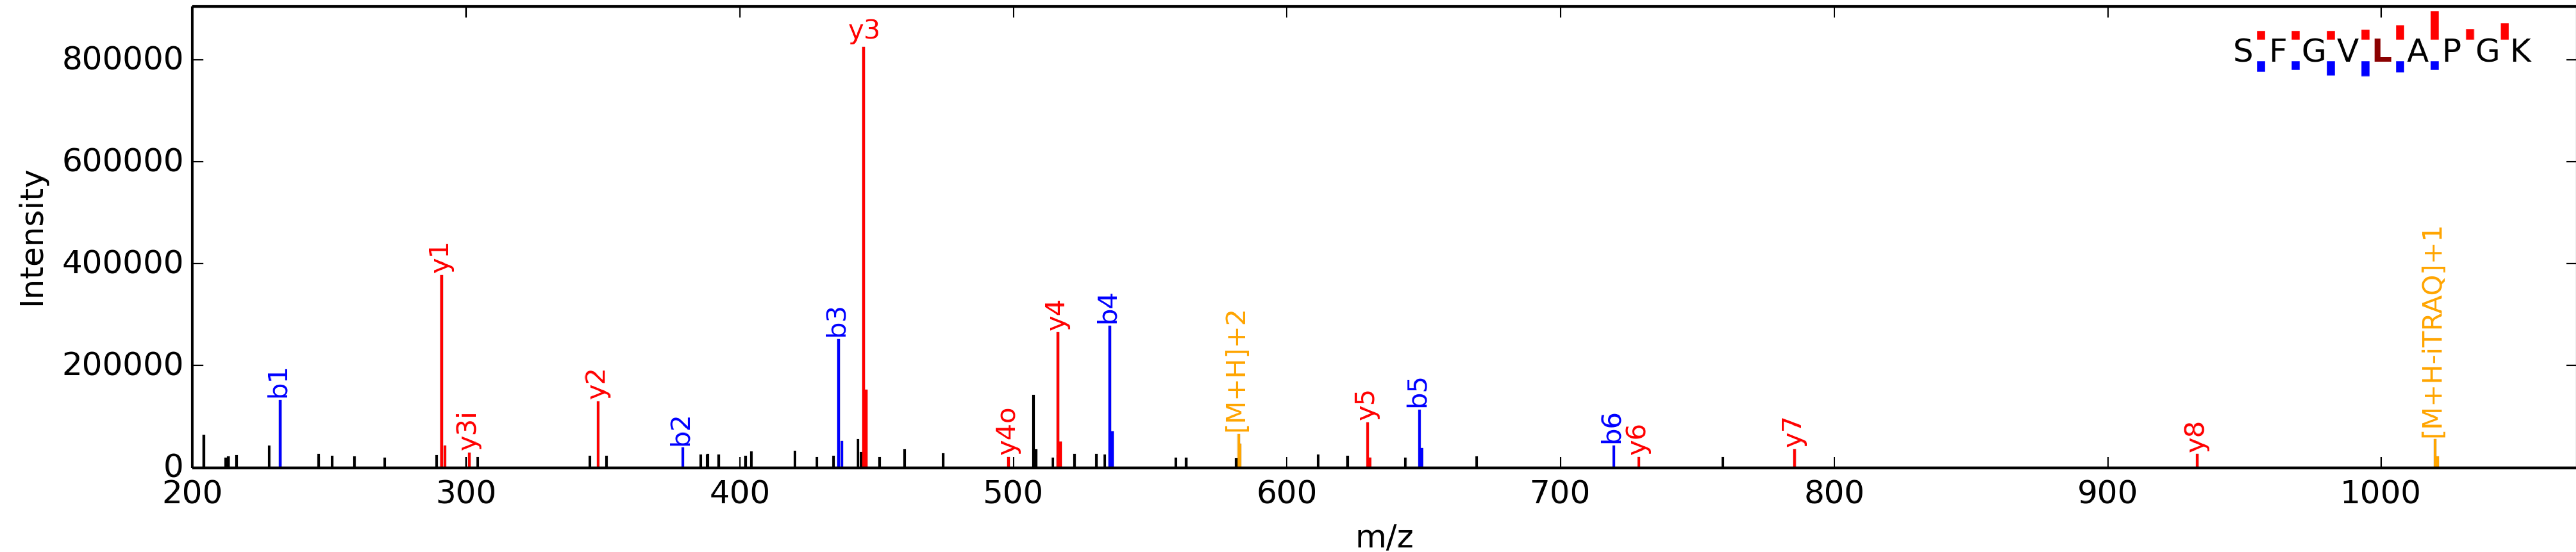

SFQGPVLIGSSHGGVNIEDVAAETPEAIK 144.10207@K30,144.10207@S1, 3+  
m= 3322.7653, matched intensity=84.5%, largest gap=1, sum gaps=4, gap at T24=0  
cptac\_p32p33\_global\_itraq4\_trypticpep\_fraction\_01, scan:13052

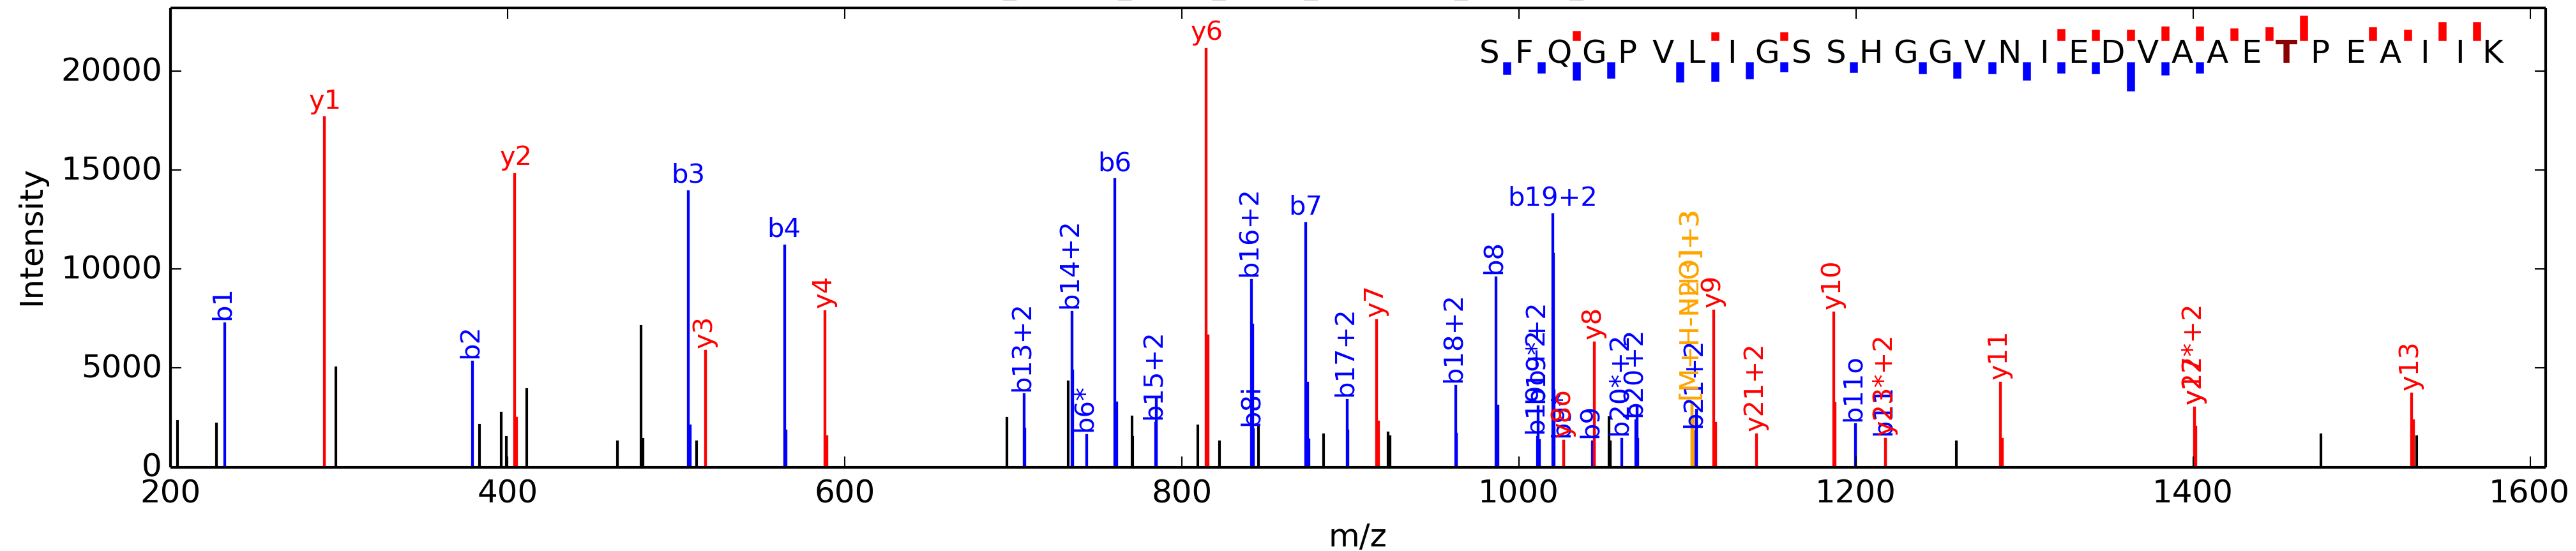

SFSQGPIGGANR 144.10207@S1, 2+

m= 1333.6861, matched intensity=71.1%, largest gap=0, sum gaps=0, gap at S3=0

CPTAC\_CompRef\_test\_iTRAQ\_12\_PD\_7Jan13\_Lynx\_12-11-08, scan:2234

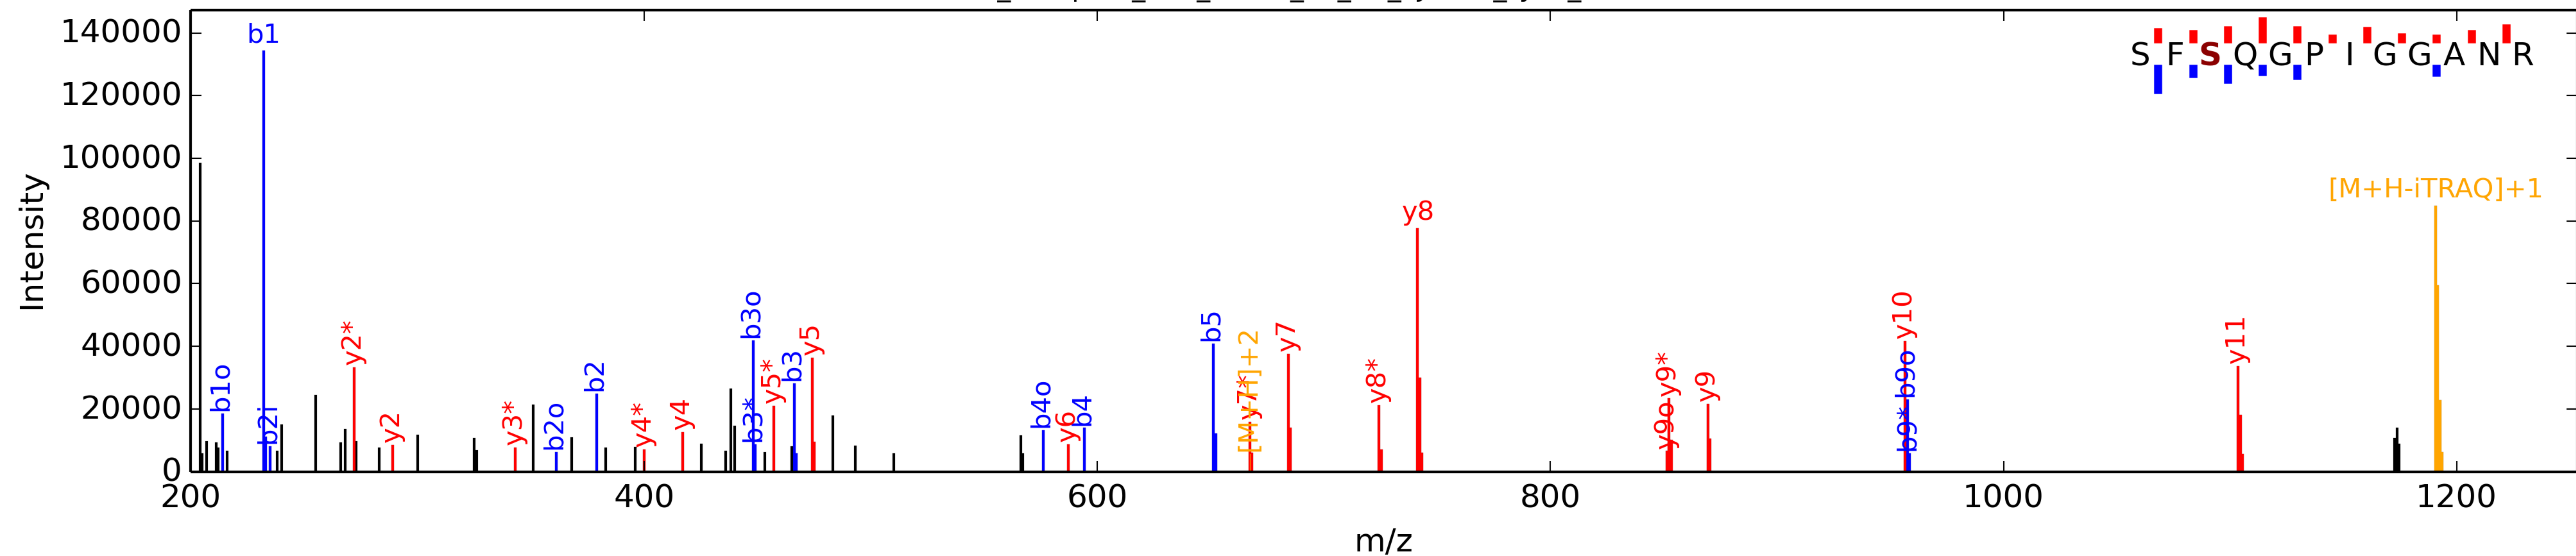



SFTFVQAGQDLEENMDEISEK 144.10207@K22,144.10207@S1, 3+  
m= 2819.3051, matched intensity=81.3%, largest gap=0, sum gaps=0, gap at F2=0  
CPTAC\_CompRef\_test\_iTRAQ\_13\_PD\_7Jan13\_Lynx\_12-11-08, scan:11395

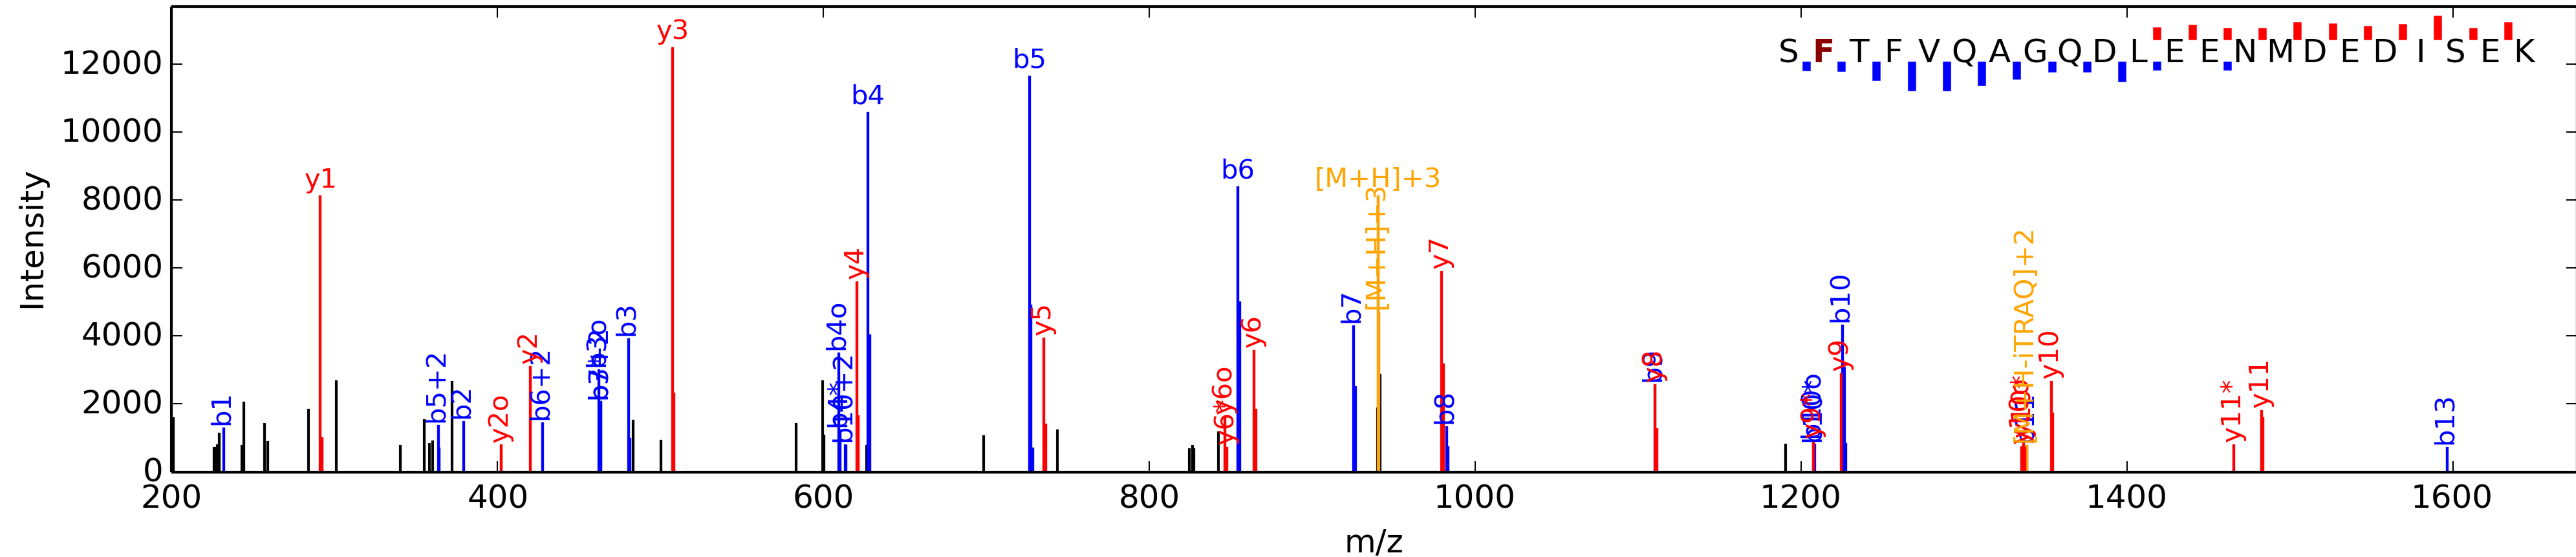

SGAHVVVTGPPNAGK 144.10207@K15,144.10207@S1, 3+  
m= 1677.9406, matched intensity=89.2%, largest gap=2, sum gaps=3, gap at A3=2  
TCGA\_CompRef\_W\_PNNL\_B2S7\_f09, scan:2530

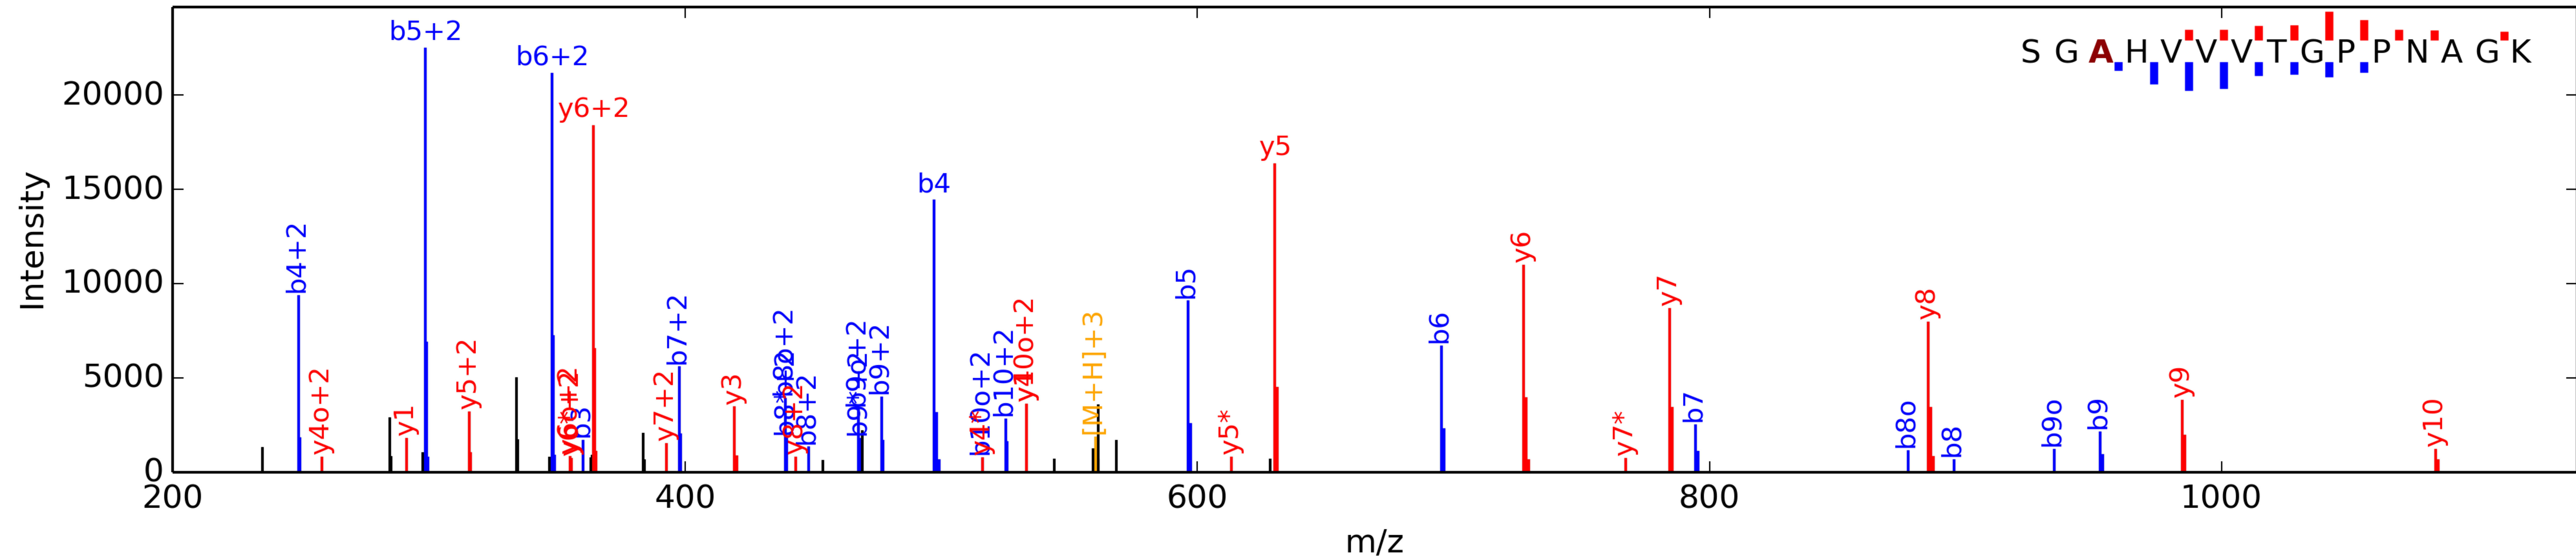

SGGKDVSAQATGK 144.10207@K4,144.10207@K13,144.10207@S1, 2+  
m= 1636.9110, matched intensity=84.2%, largest gap=1, sum gaps=1, gap at S1=0  
cptac\_p32p33\_global\_itraq4\_trypticpep\_fraction\_22, scan:1535

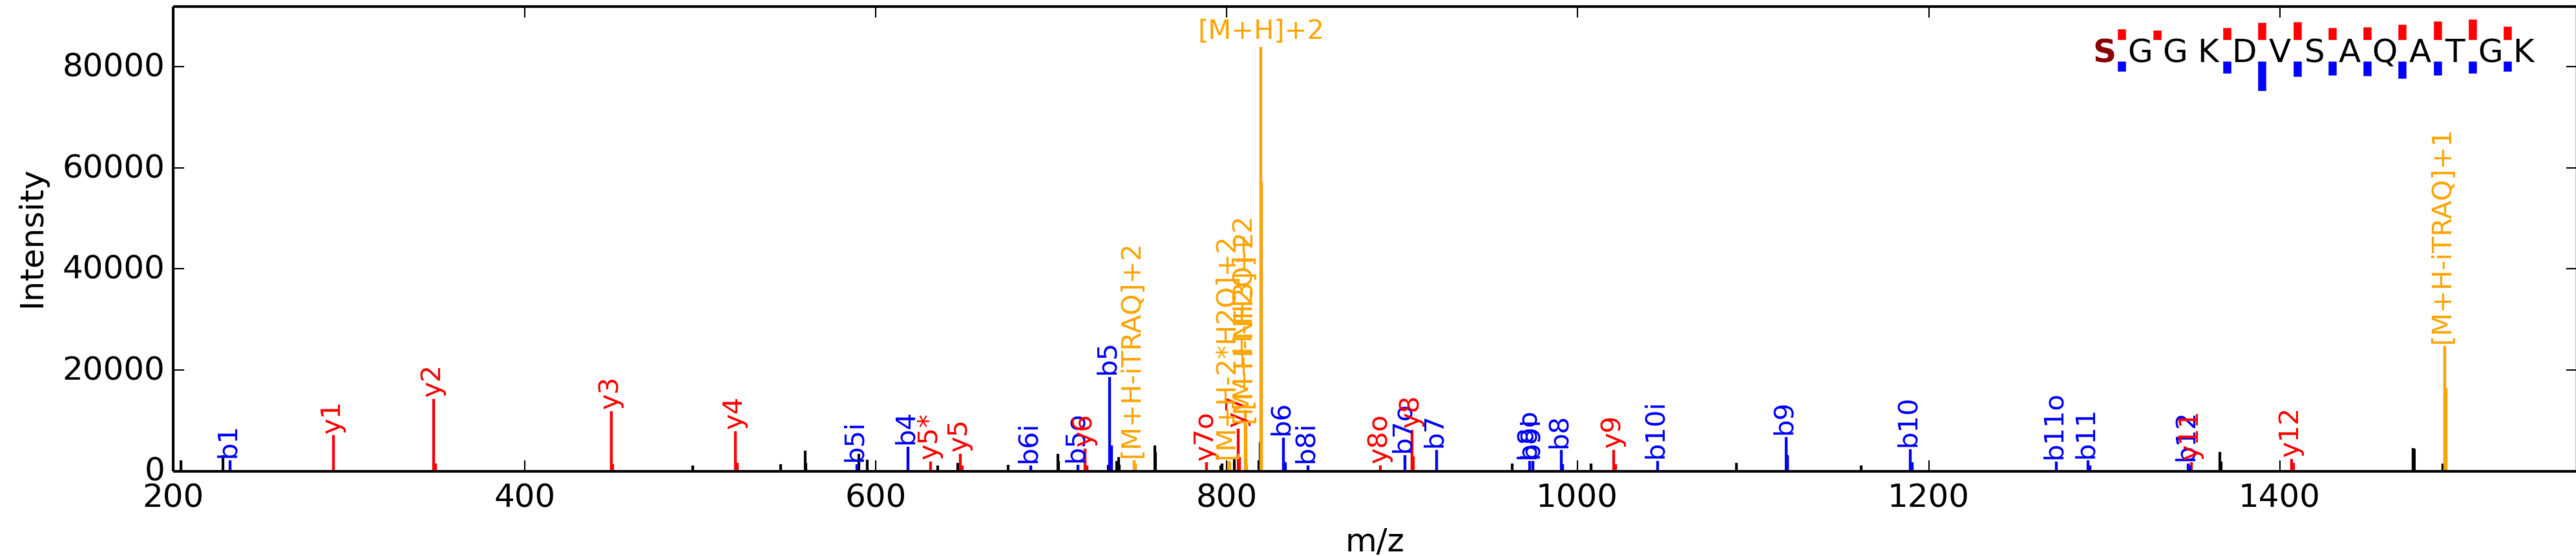



SGMSLTQDMLNGELK 144.10207@K15,144.10207@S1, 2+  
m= 1910.9685, matched intensity=57.5%, largest gap=0, sum gaps=0, gap at G2=0  
CompRef\_P5-25\_P5-19\_P6-85\_P6-58\_W\_BI\_20130717\_f06, scan:27518

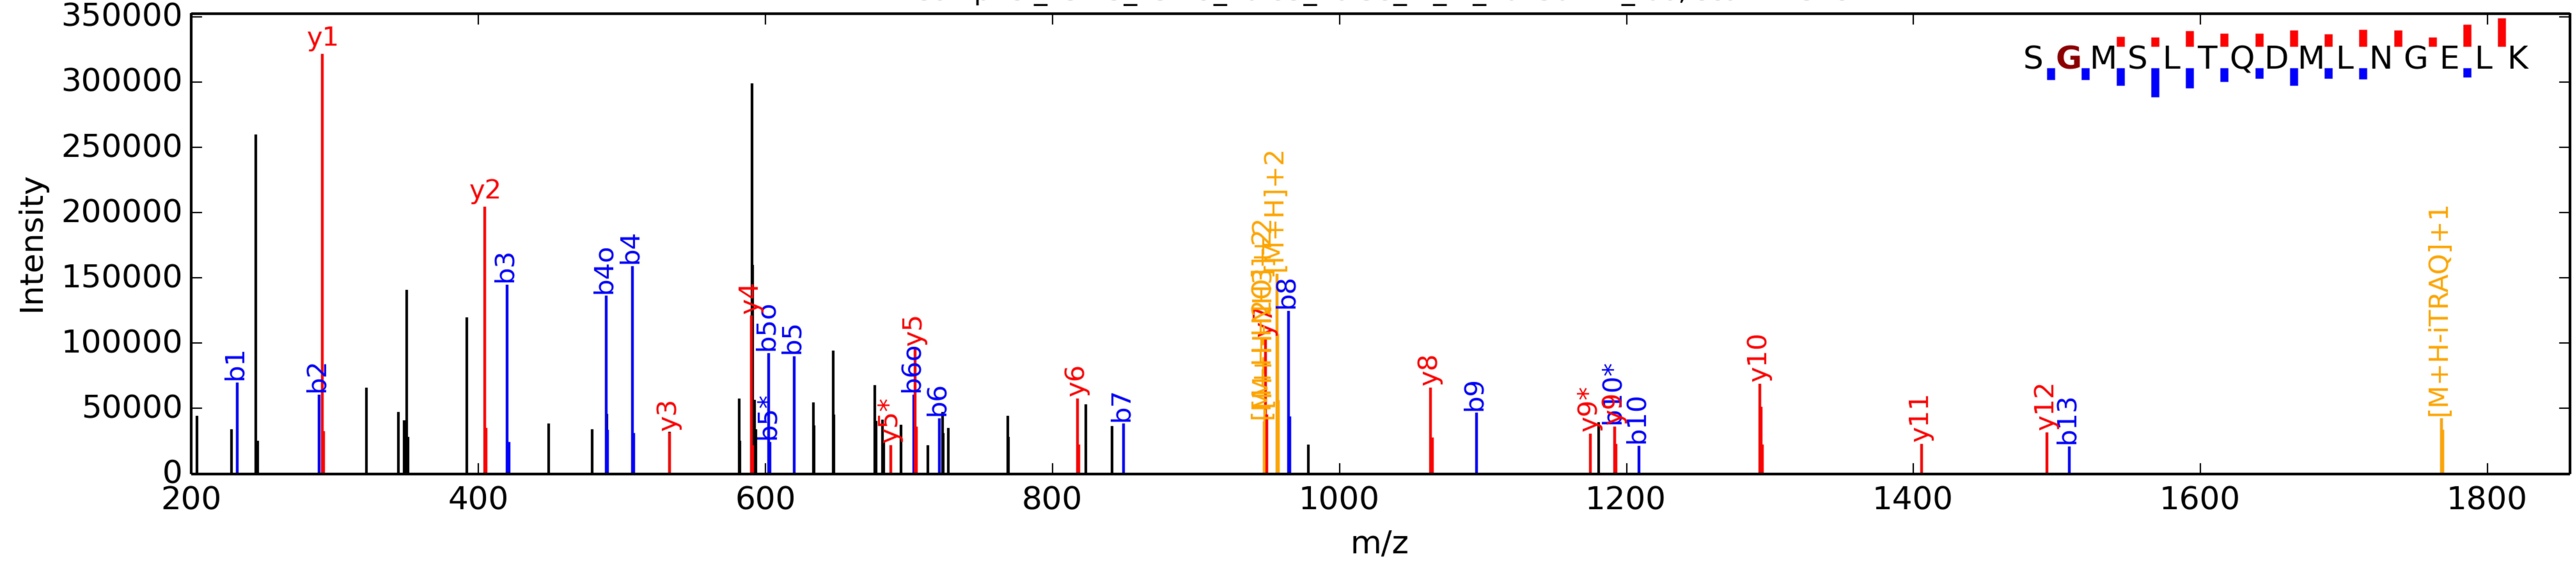

SGTPQLSLPFAAR 144.10207@S1, 2+  
m= 1487.8218, matched intensity=77.8%, largest gap=1, sum gaps=1, gap at S7=0  
H20120525\_JQ\_CPTAC2\_Compref4\_protfxn03, scan:26822

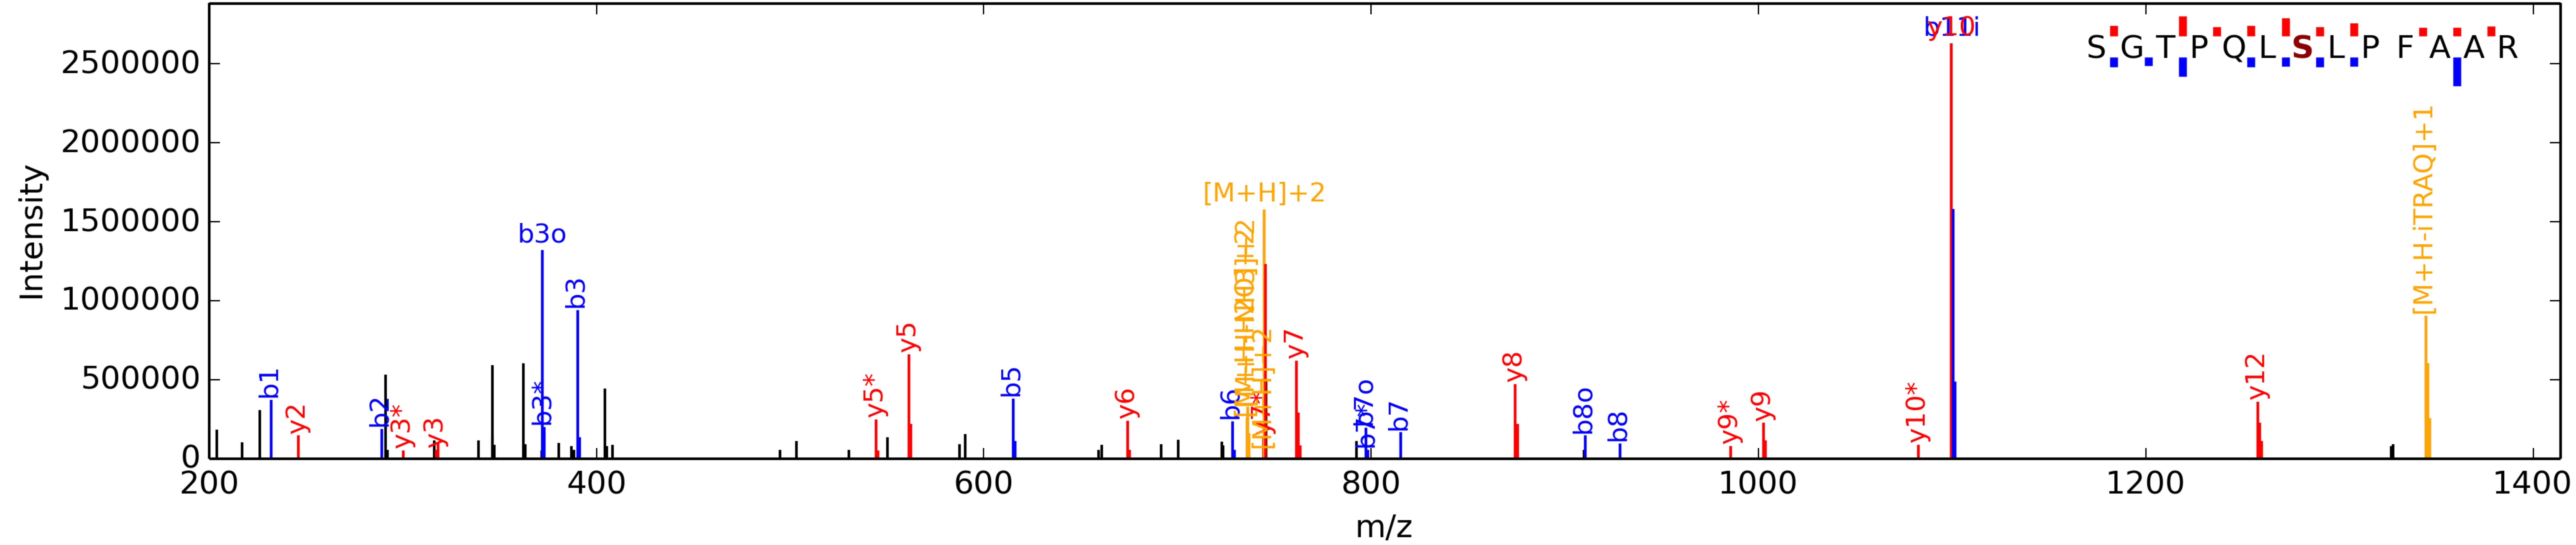

SHAVGPQEIQR 144.10207@S1, 3+

m= 1493.7708, matched intensity=57.0%, largest gap=1, sum gaps=1, gap at Q10=0

CompRef\_2B\_P5-29\_P5-61\_P6-34\_P6-38\_W\_BI\_20130503\_H-JQ\_f11, scan:5682

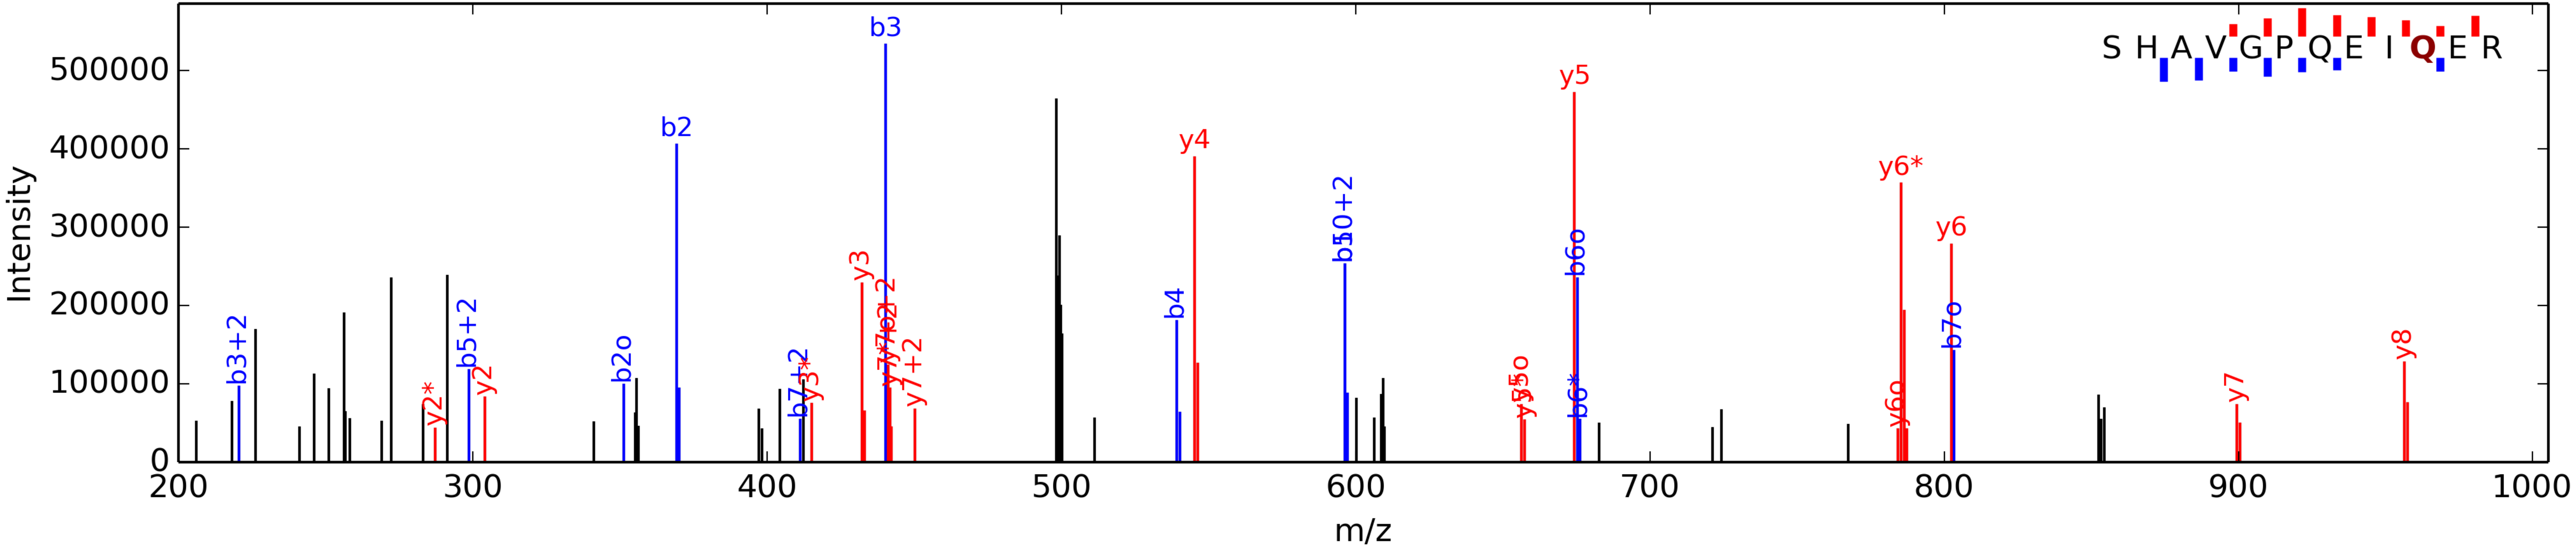

S H A V G P Q E I Q E R



SHIAEGPADLEDPLNPK 144.10207@K17,144.10207@S1, 3+  
m= 2090.0888, matched intensity=69.6%, largest gap=0, sum gaps=0, gap at L14=0  
CompRef\_2A\_P5-29\_P5-61\_P6-34\_P6-38\_W\_BI\_20130502\_H-JQ\_f15, scan:19602

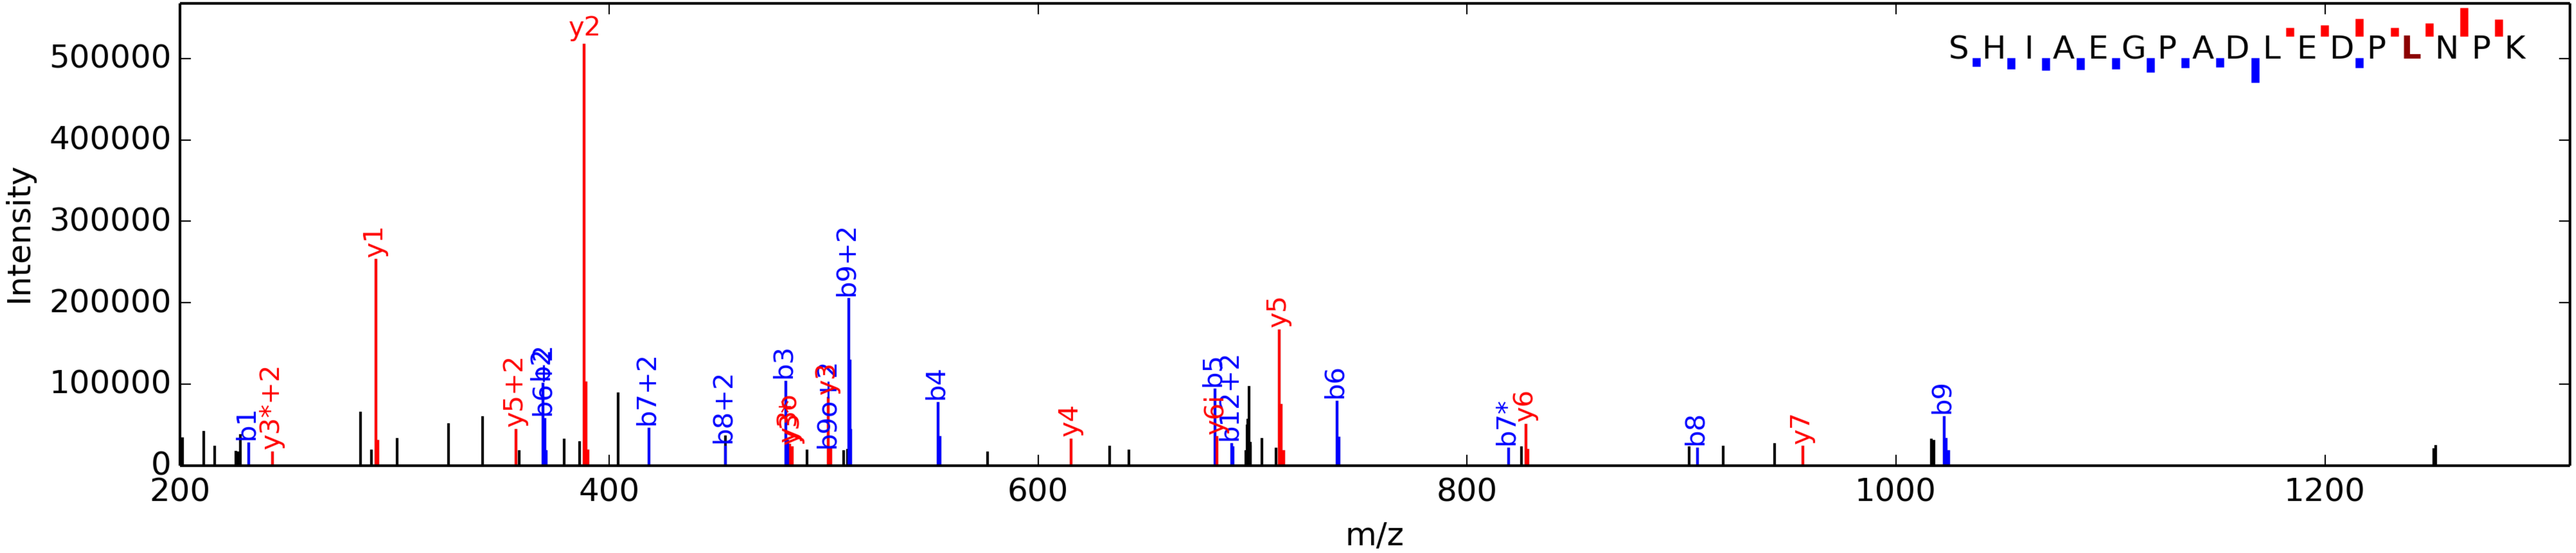

S.H.I.A.E.G.P.A.D.L.E.D.P.L.N.P.K

SHIYFWTLGGSLSK 144.10207@K15,144.10207@S1, 3+  
 m= 1998.0455, matched intensity=76.1%, largest gap=0, sum gaps=0, gap at D9=0  
 CompRef\_P5-91\_P6-74\_P5-100\_P6-108\_W\_BI\_20131004\_f03, scan:28040

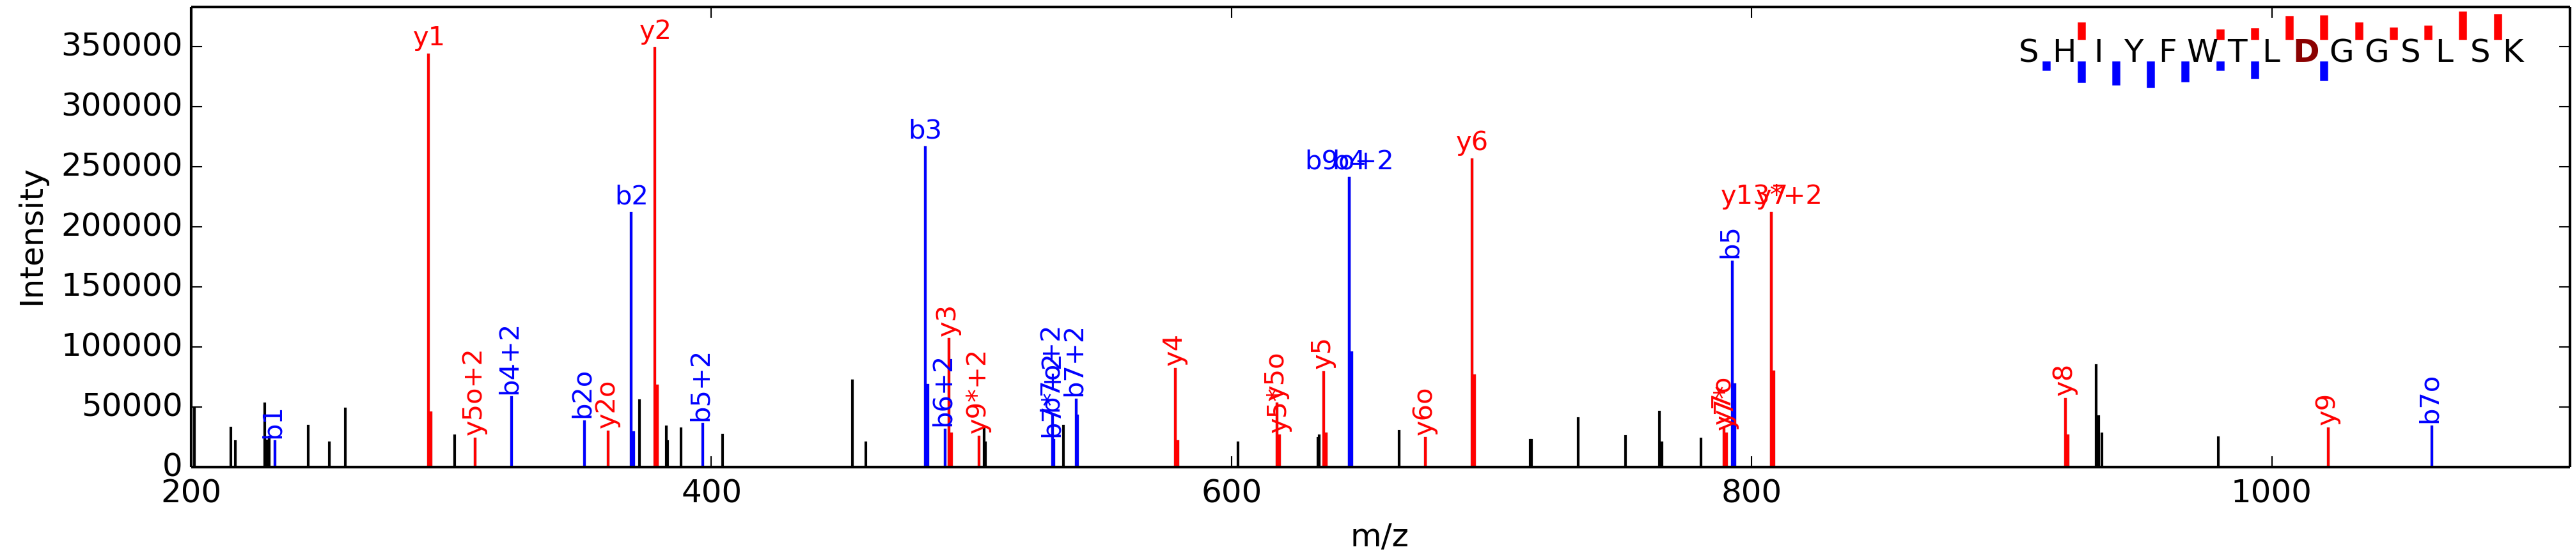

SIAASVDVSAPK 144.10207@K12,144.10207@S1, 2+  
m= 1431.8177, matched intensity=85.6%, largest gap=0, sum gaps=0, gap at A3=0  
cptac\_p5p6\_w\_itraq4\_jhu\_04292013\_f7, scan:6730

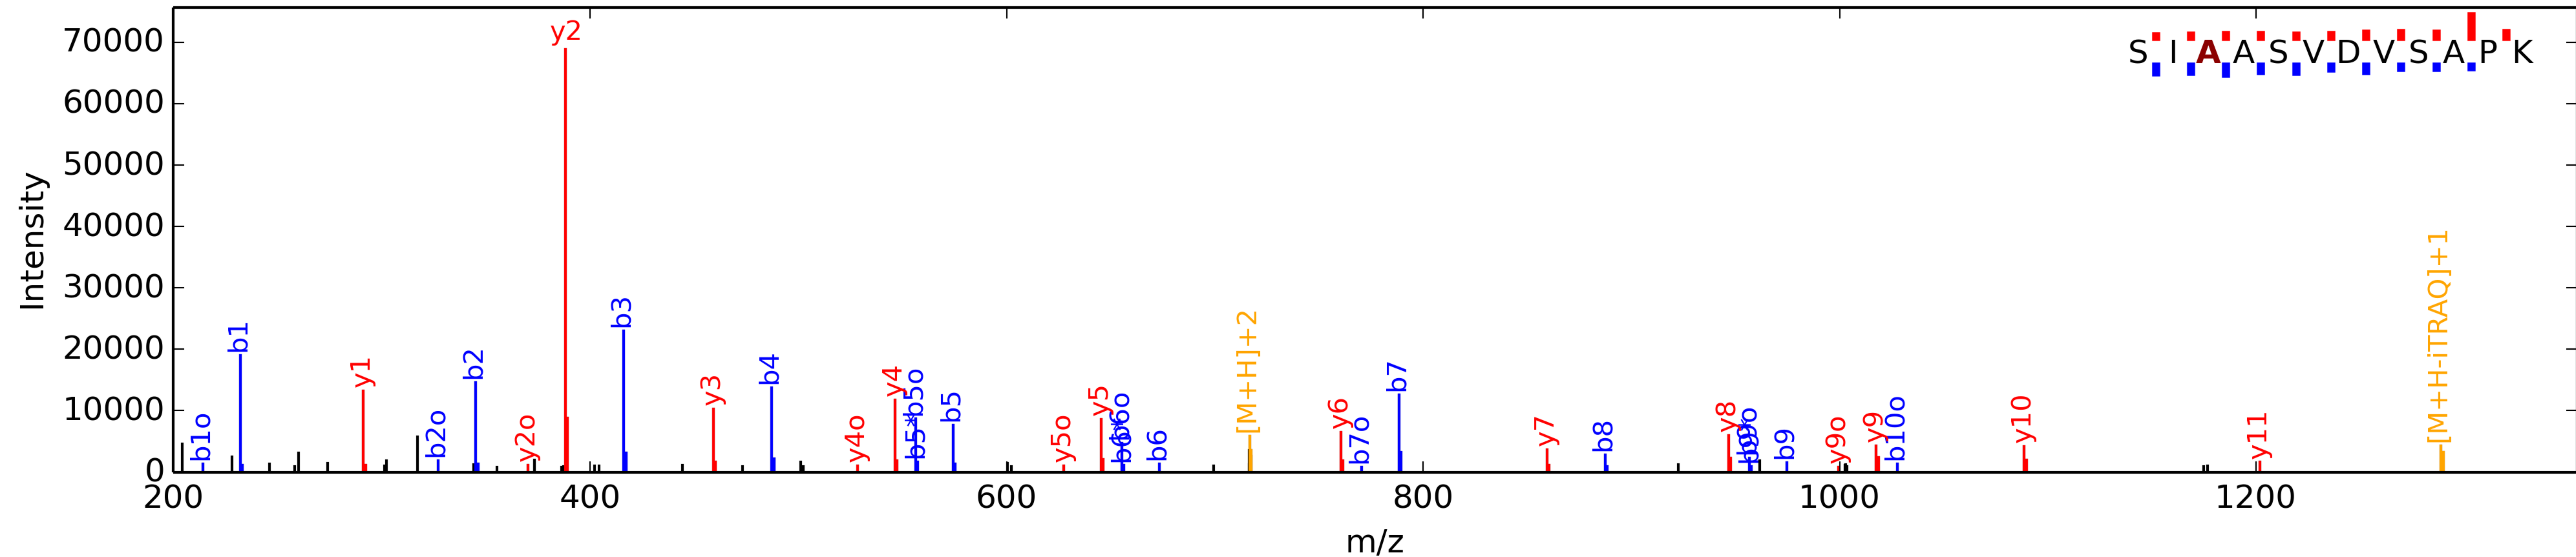



SIAIGSQPLLVGTTHISK 144.10207@K19,144.10207@S1, 3+  
m= 2210.2878, matched intensity=80.6%, largest gap=0, sum gaps=0, gap at L9=0  
CompRef\_2A\_P5-29\_P5-61\_P6-34\_P6-38\_W\_BI\_20130502\_H-JQ\_f01, scan:26473

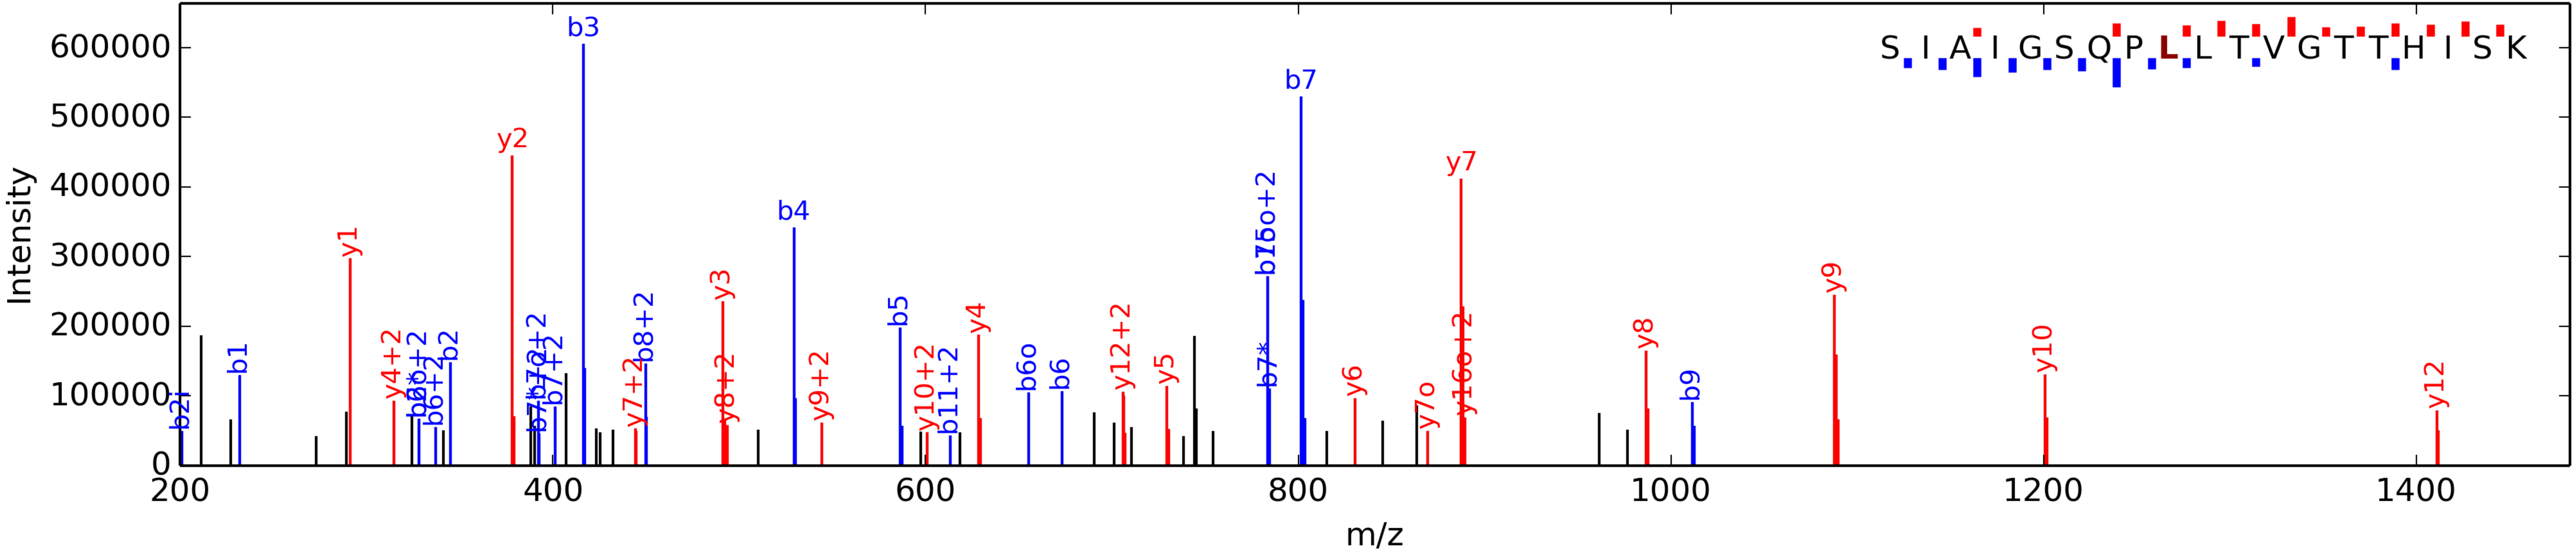

SIDPGLKEDTLEFLIK 144.10207@K7,144.10207@K16,144.10207@S1, 3+  
 m= 2249.2884, matched intensity=83.1%, largest gap=0, sum gaps=0, gap at E12=0  
 cptac\_p5p6\_w\_itraq4\_jhu\_04292013\_f22, scan:16297

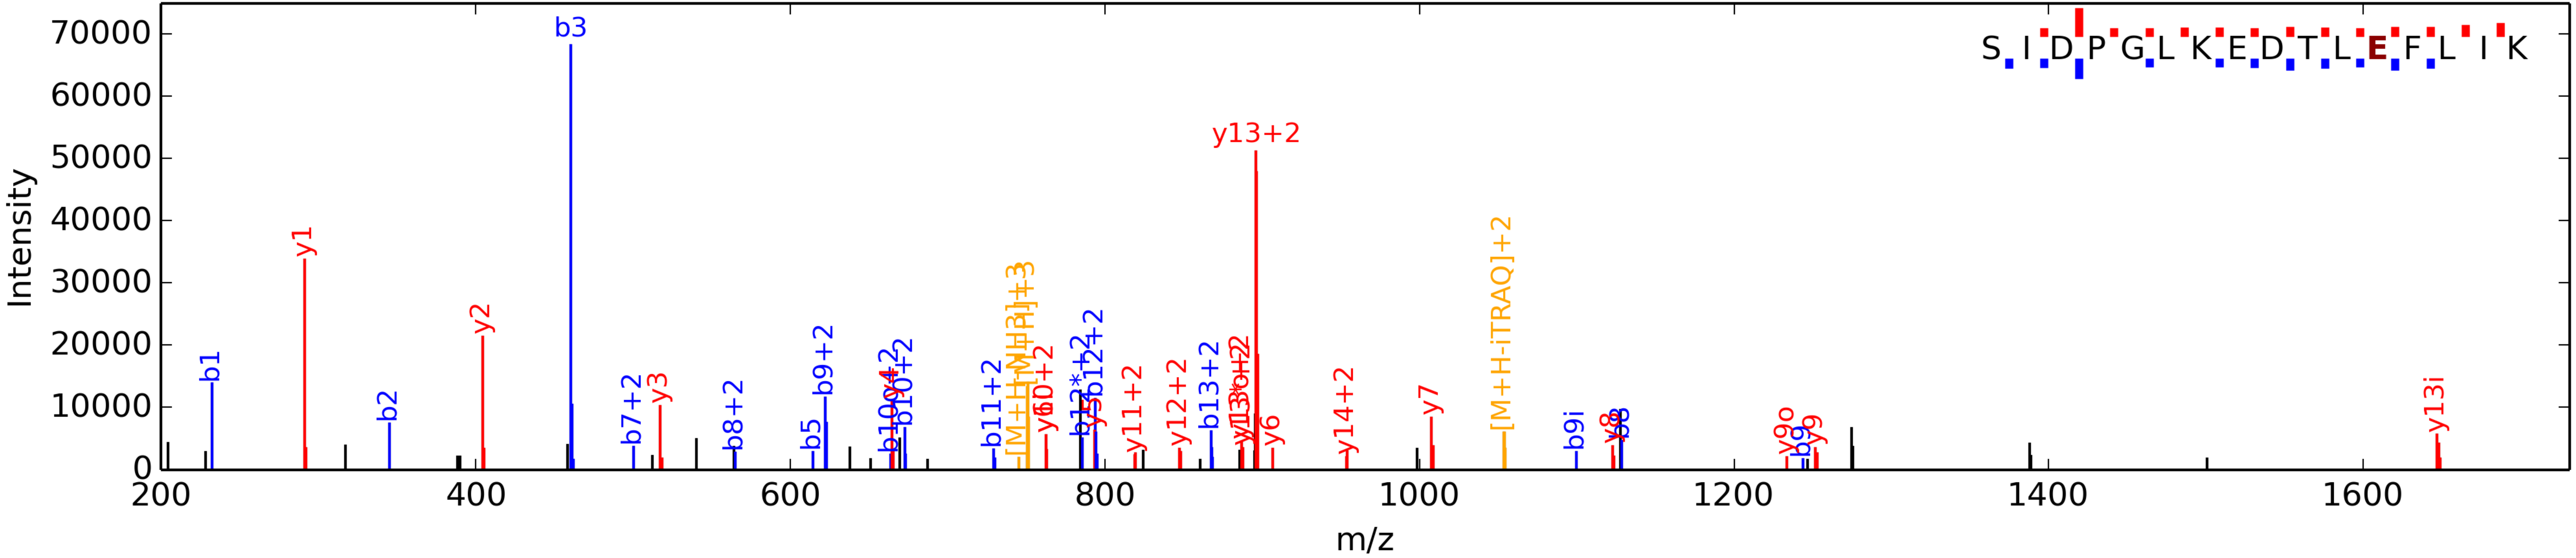

SIPPEGLVQSELMR 144.10207@S1, 3+  
m= 1698.9096, matched intensity=57.5%, largest gap=0, sum gaps=0, gap at V8=0  
CompRef\_P5-65\_P6-20\_P5-71\_P6-62\_W\_BI\_20131120\_f06, scan:27124

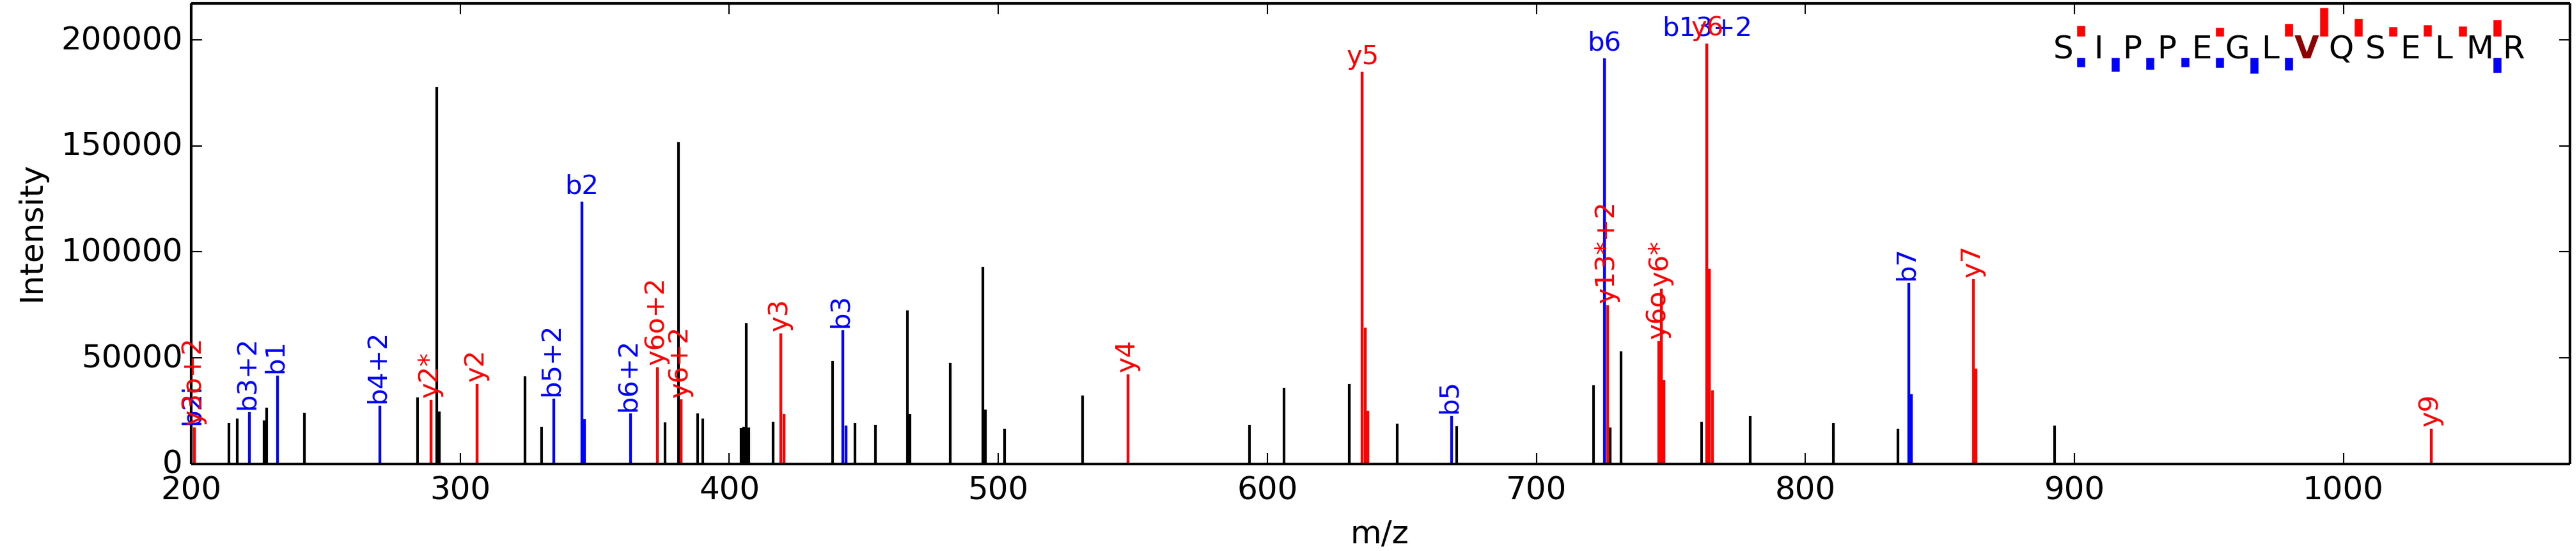



SIPQPHQLLGR 144.10207@S1,79.96633@S1, 3+  
m= 1324.6653, matched intensity=57.3%, largest gap=0, sum gaps=0, gap at L8=0  
H20120518\_JQ\_CPTAC2\_COMPREF4\_IMAC\_09, scan:16344

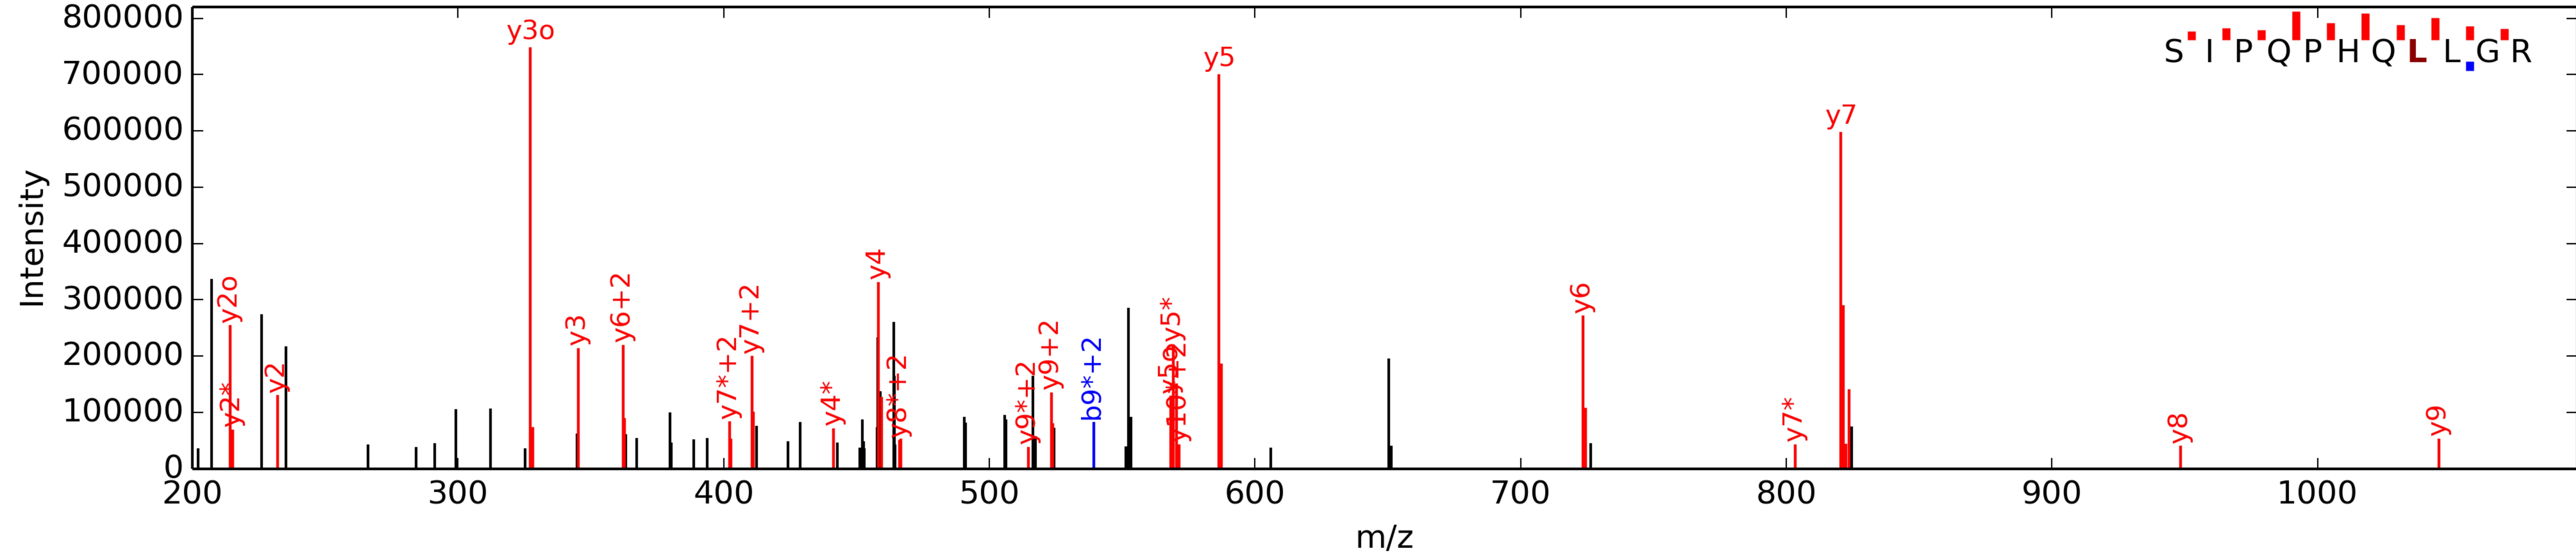

SISELSDQDKQEK 144.10207@K10,144.10207@K13,144.10207@S1, 3+  
 m= 1938.0271, matched intensity=73.4%, largest gap=1, sum gaps=1, gap at D9=0  
 H20120525\_JQ\_CPTAC2\_Compref4\_prof4xn10, scan:10190

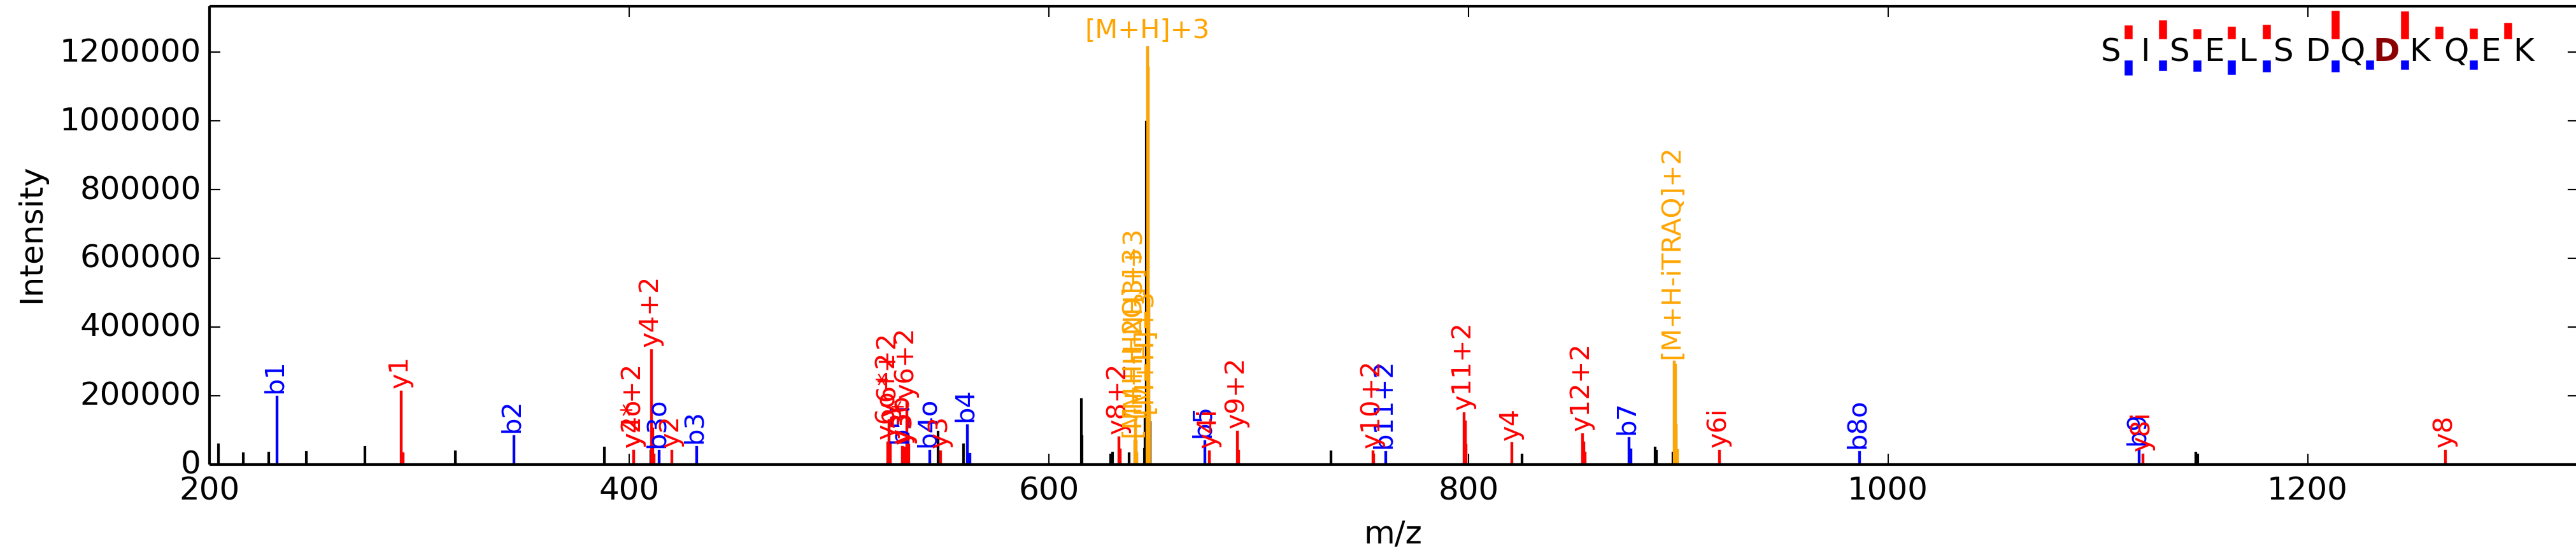

SISTPYSCAMHLSEWYCR 57.02200@C8,57.02200@C17,144.10207@S1, 3+  
m= 2391.0579, matched intensity=83.2%, largest gap=0, sum gaps=0, gap at S1=0  
cptac\_p32p33\_global\_itraq4\_trypticpep\_fraction\_18, scan:10756

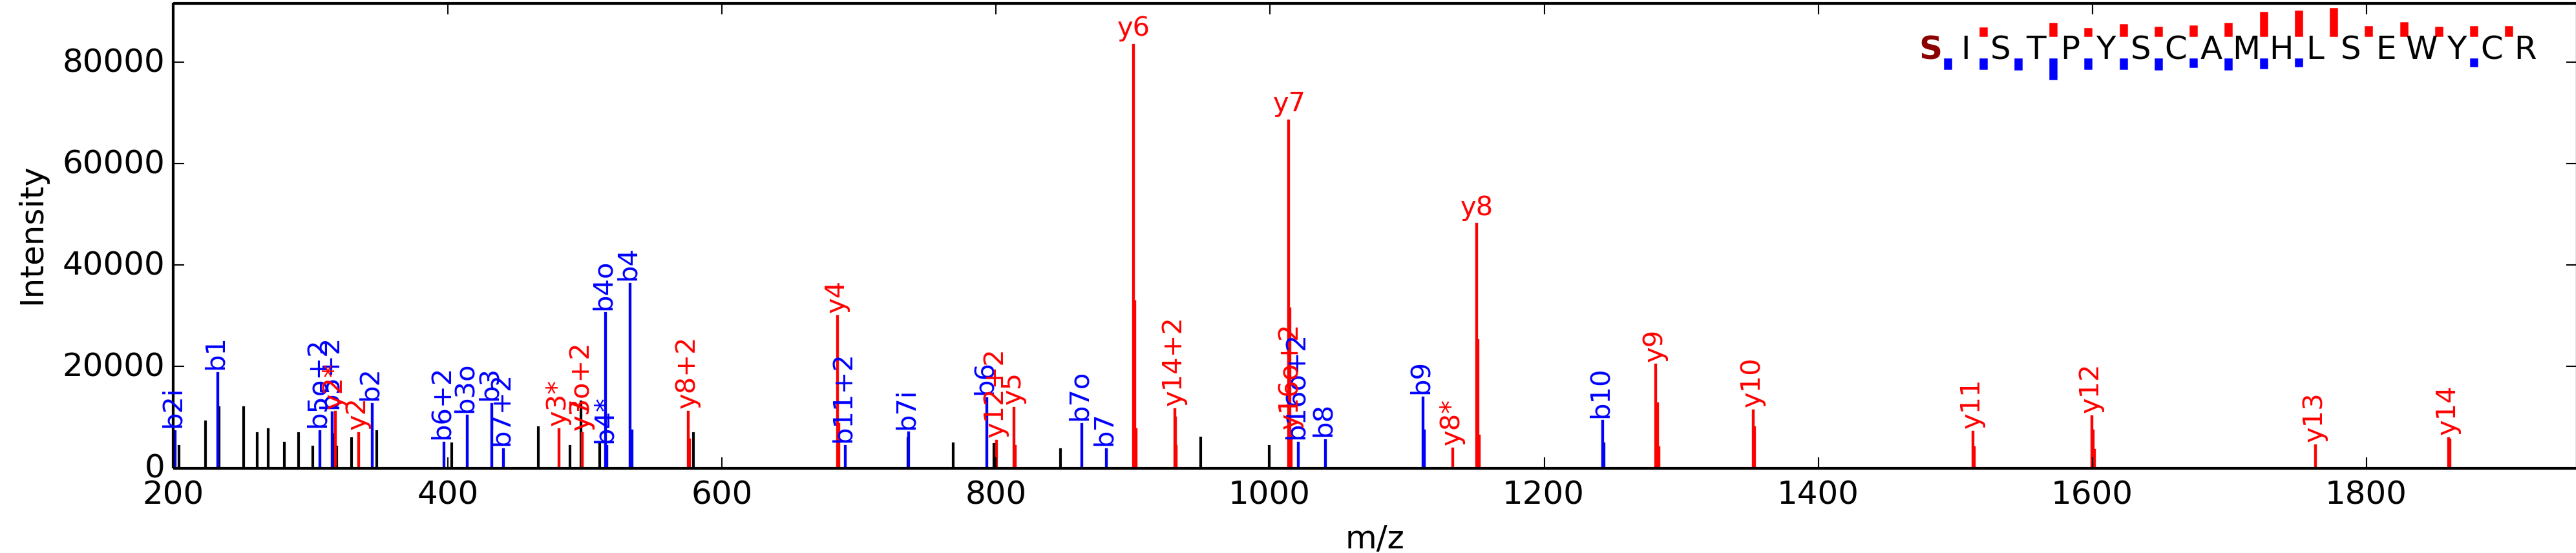



SKVEETTEHFVTK 144.10207@K2,144.10207@K13,144.10207@S1, 3+  
 m= 1966.0737, matched intensity=88.7%, largest gap=1, sum gaps=1, gap at F10=0  
 H20120525\_JQ\_CPTAC2\_Compref4\_protfxn19, scan:12320

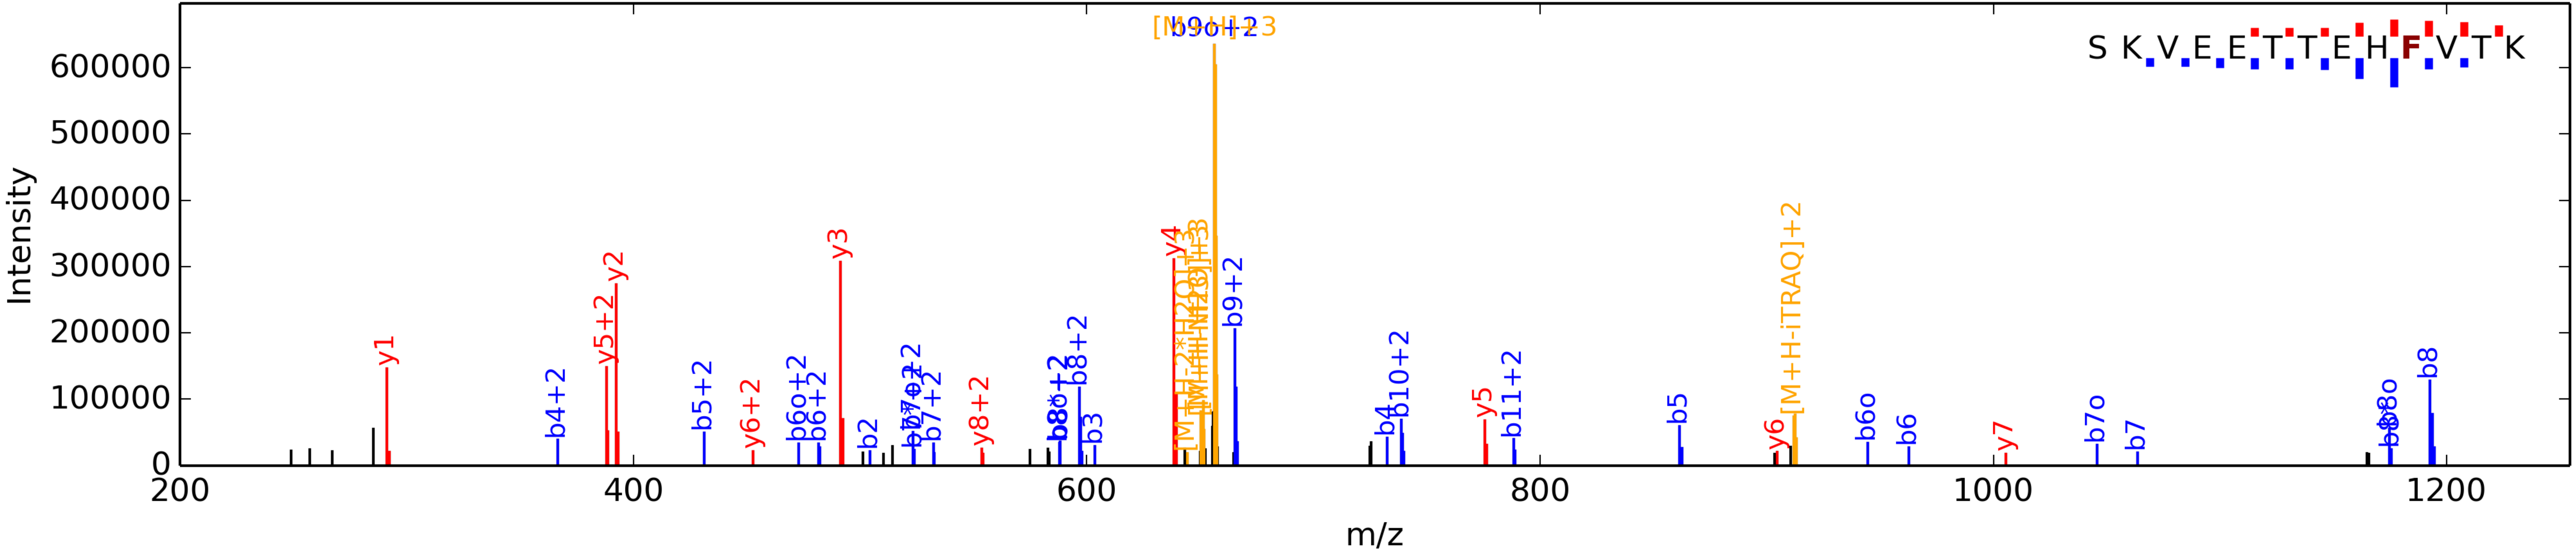







SLDLDDWPIELIK 144.10207@K13,144.10207@S1, 3+  
m= 1844.0175, matched intensity=70.8%, largest gap=0, sum gaps=0, gap at I9=0  
CompRef\_2A\_P5-29\_P5-61\_P6-34\_P6-38\_W\_BI\_20130502\_H-JQ\_f14, scan:40700

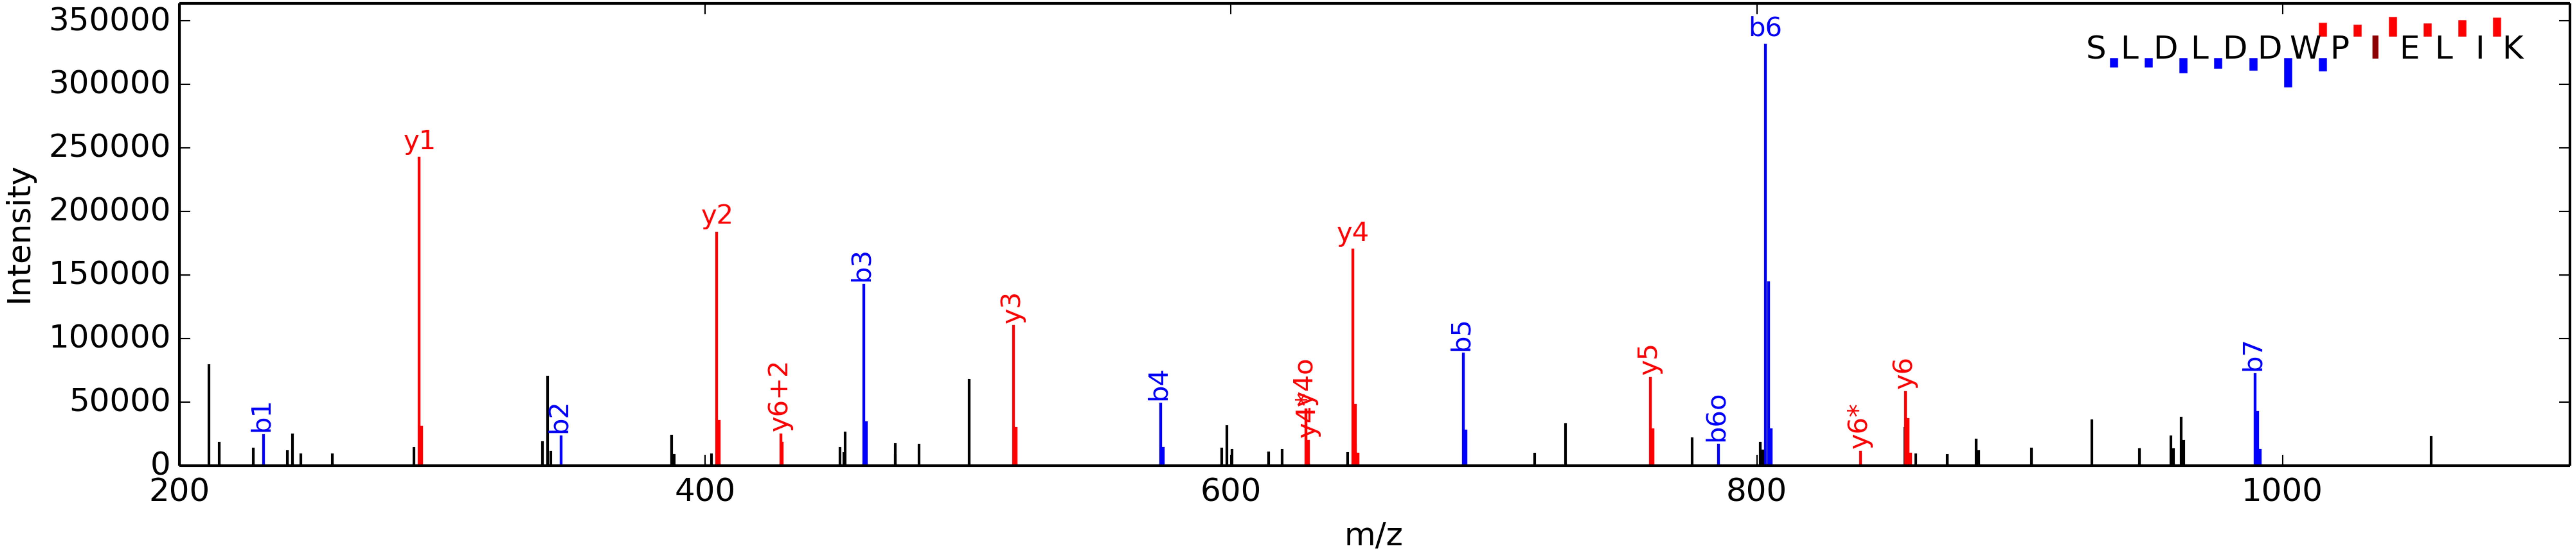

SLDNKGDTGDQVCVSK 57.02200@C15,144.10207@K5,144.10207@K18,144.10207@S1, 3+  
 m= 2398.1653, matched intensity=92.6%, largest gap=1, sum gaps=2, gap at K18=0  
 H20120525\_JQ\_CPTAC2\_Compref4\_protfxn08, scan:11469

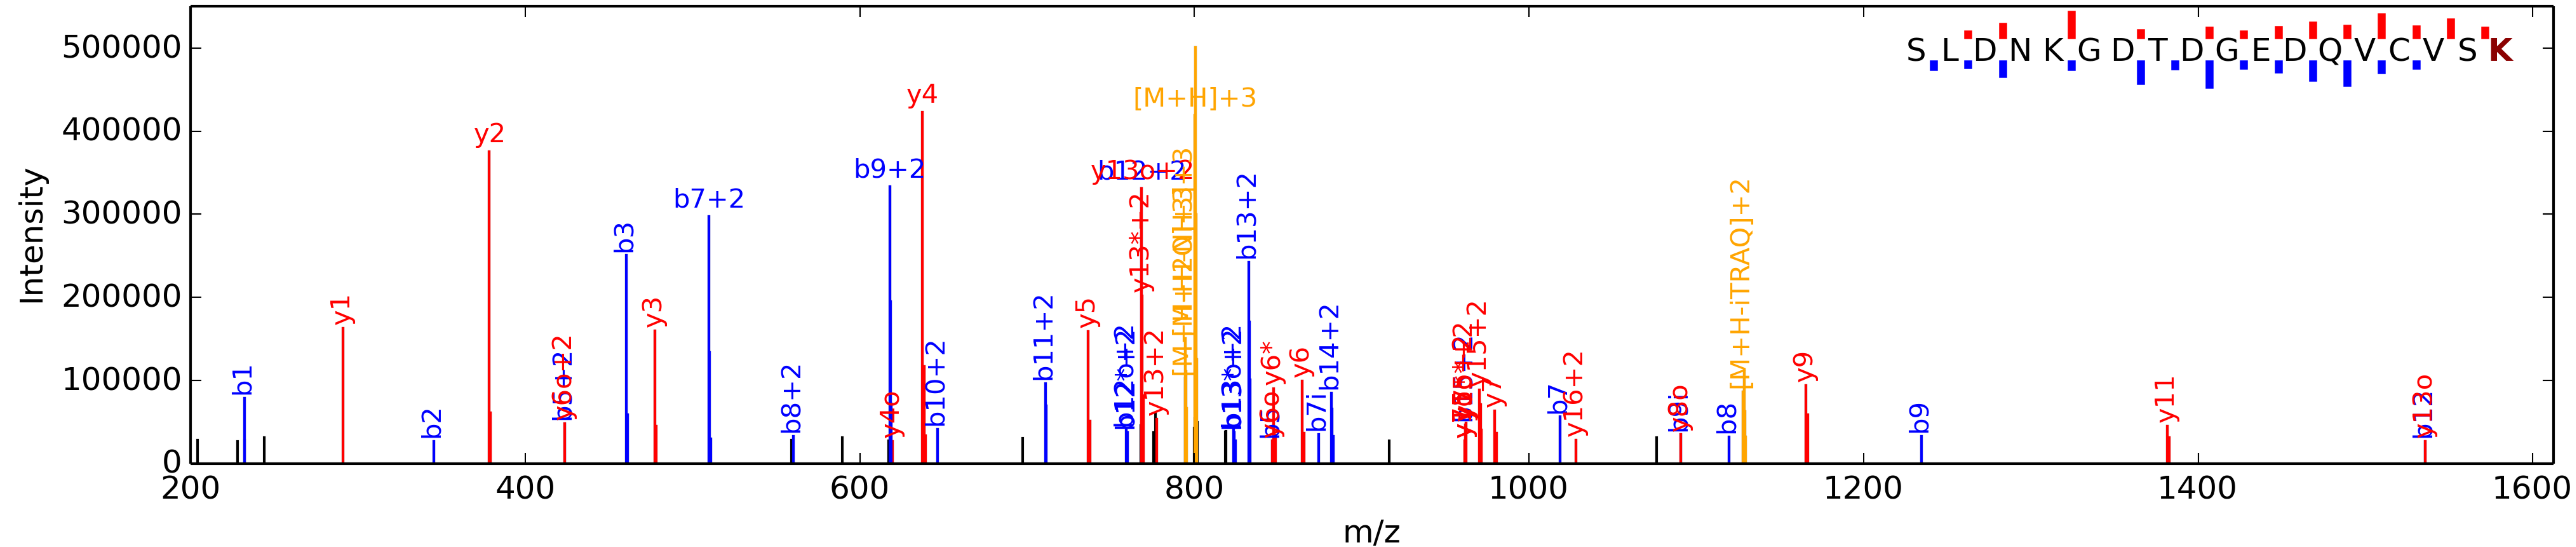

SLDVLGWEER 144.10207@S1, 2+  
m= 1346.6952, matched intensity=81.4%, largest gap=0, sum gaps=0, gap at V4=0  
H20130119\_PM\_CompRef\_BC1\_proteome\_fxn06, scan:29332

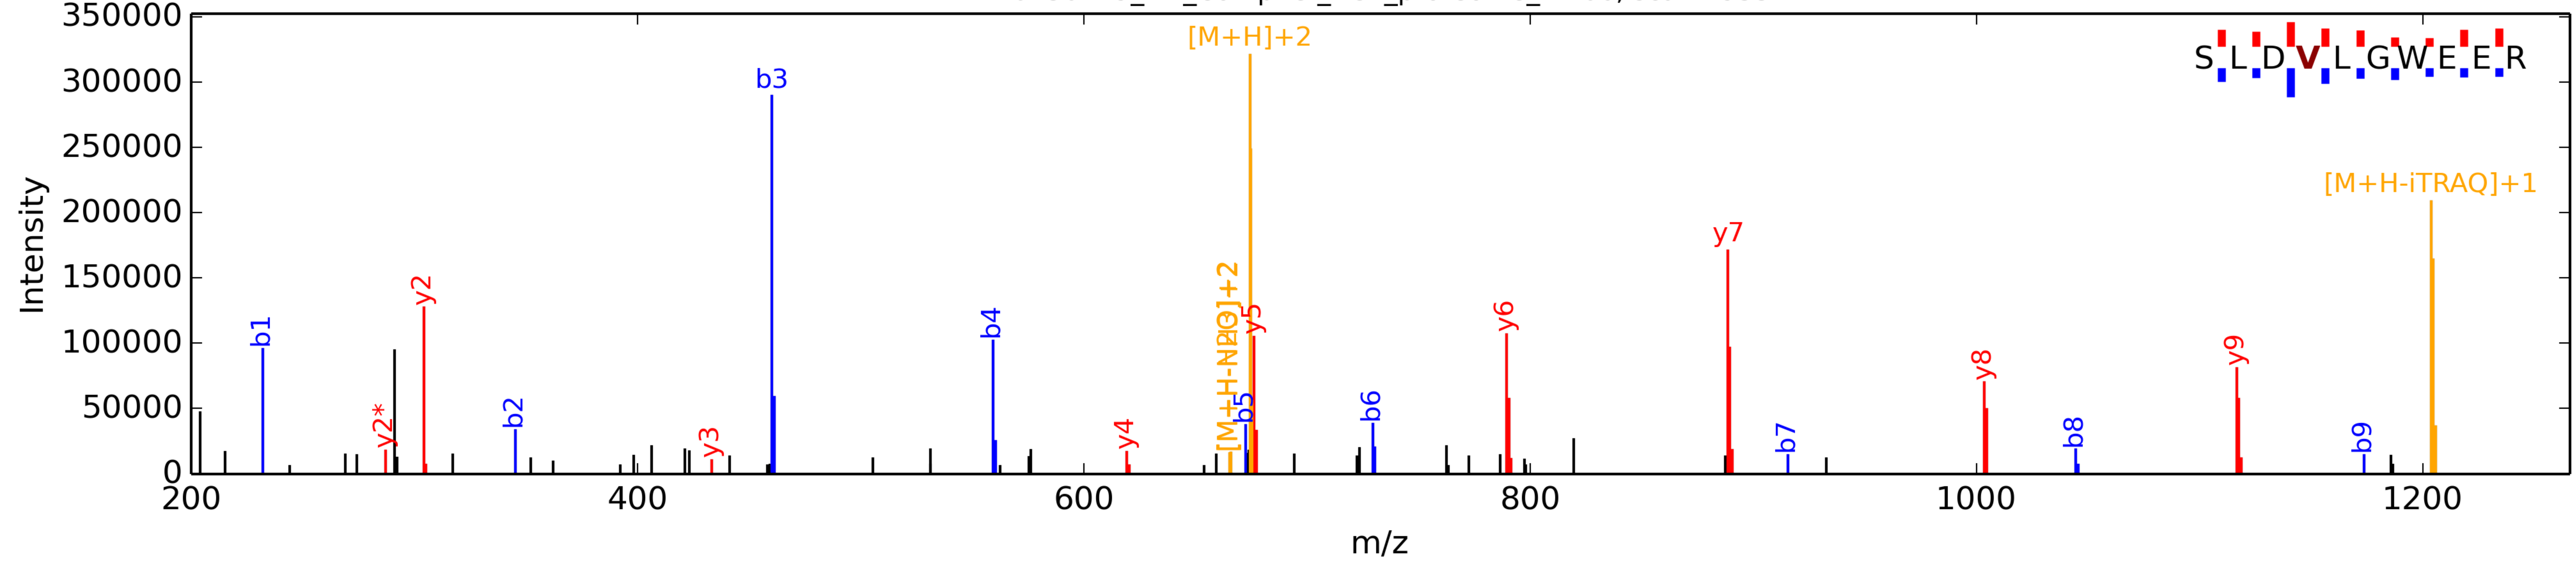



SLETEILSLR 144.10207@S1, 2+

m= 1432.7895, matched intensity=76.7%, largest gap=0, sum gaps=0, gap at R11=0

CompRef\_2B\_P5-29\_P5-61\_P6-34\_P6-38\_W\_BI\_20130503\_H-JQ\_f05, scan:32781

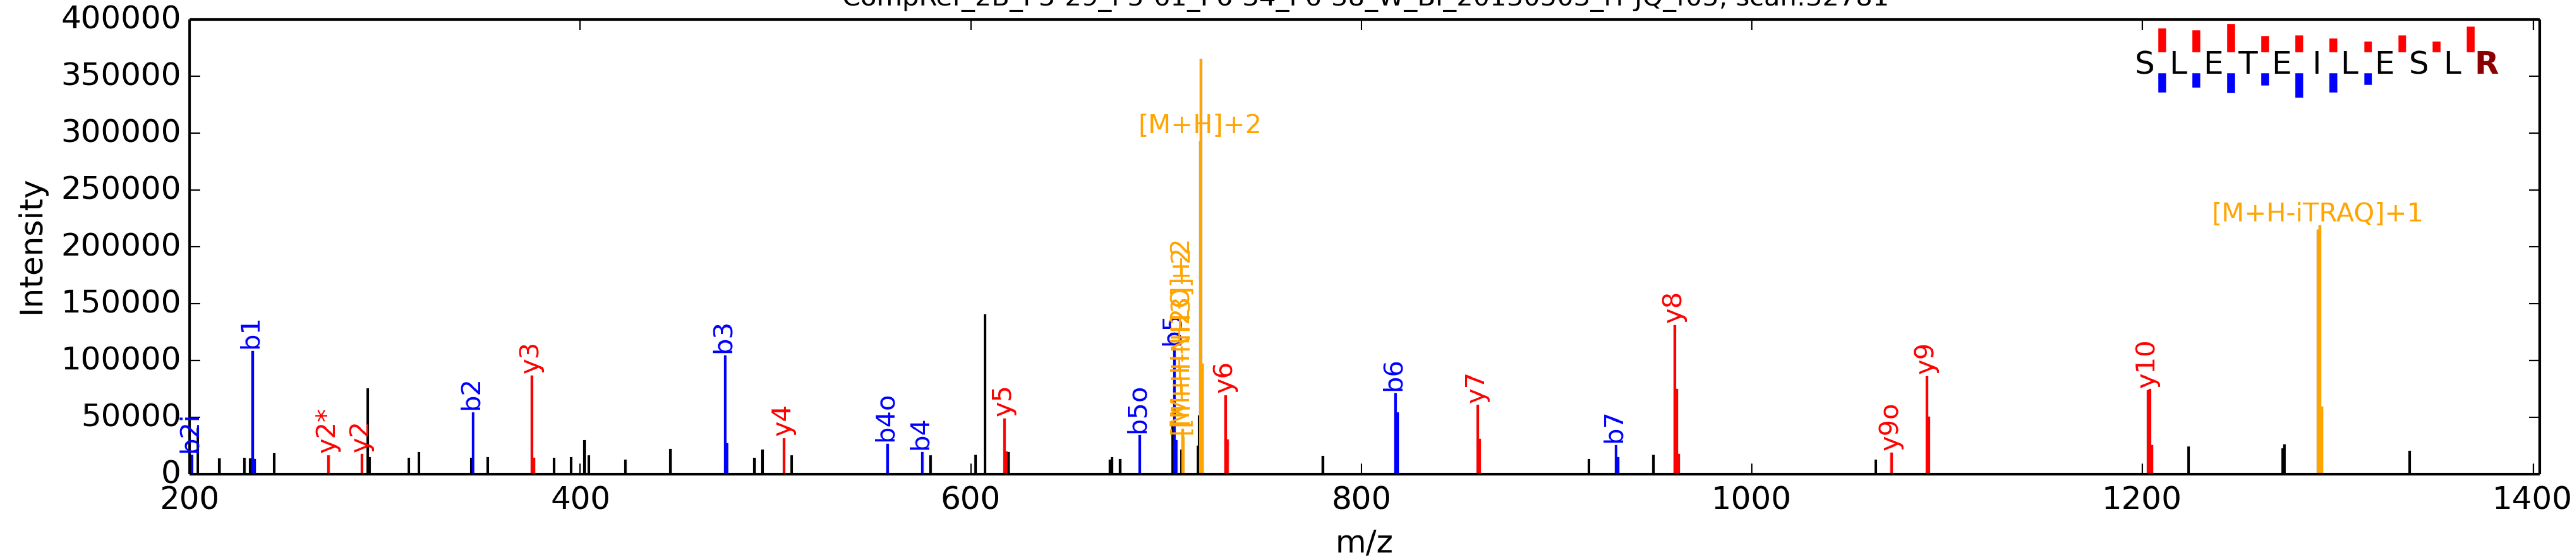

SLGNIIMVCR 57.02200@C9,144.10207@S1, 2+  
m= 1305.7024, matched intensity=60.6%, largest gap=0, sum gaps=0, gap at I5=0  
CompRef\_P5-91\_P6-74\_P5-100\_P6-108\_W\_BI\_20131004\_f24, scan:24117

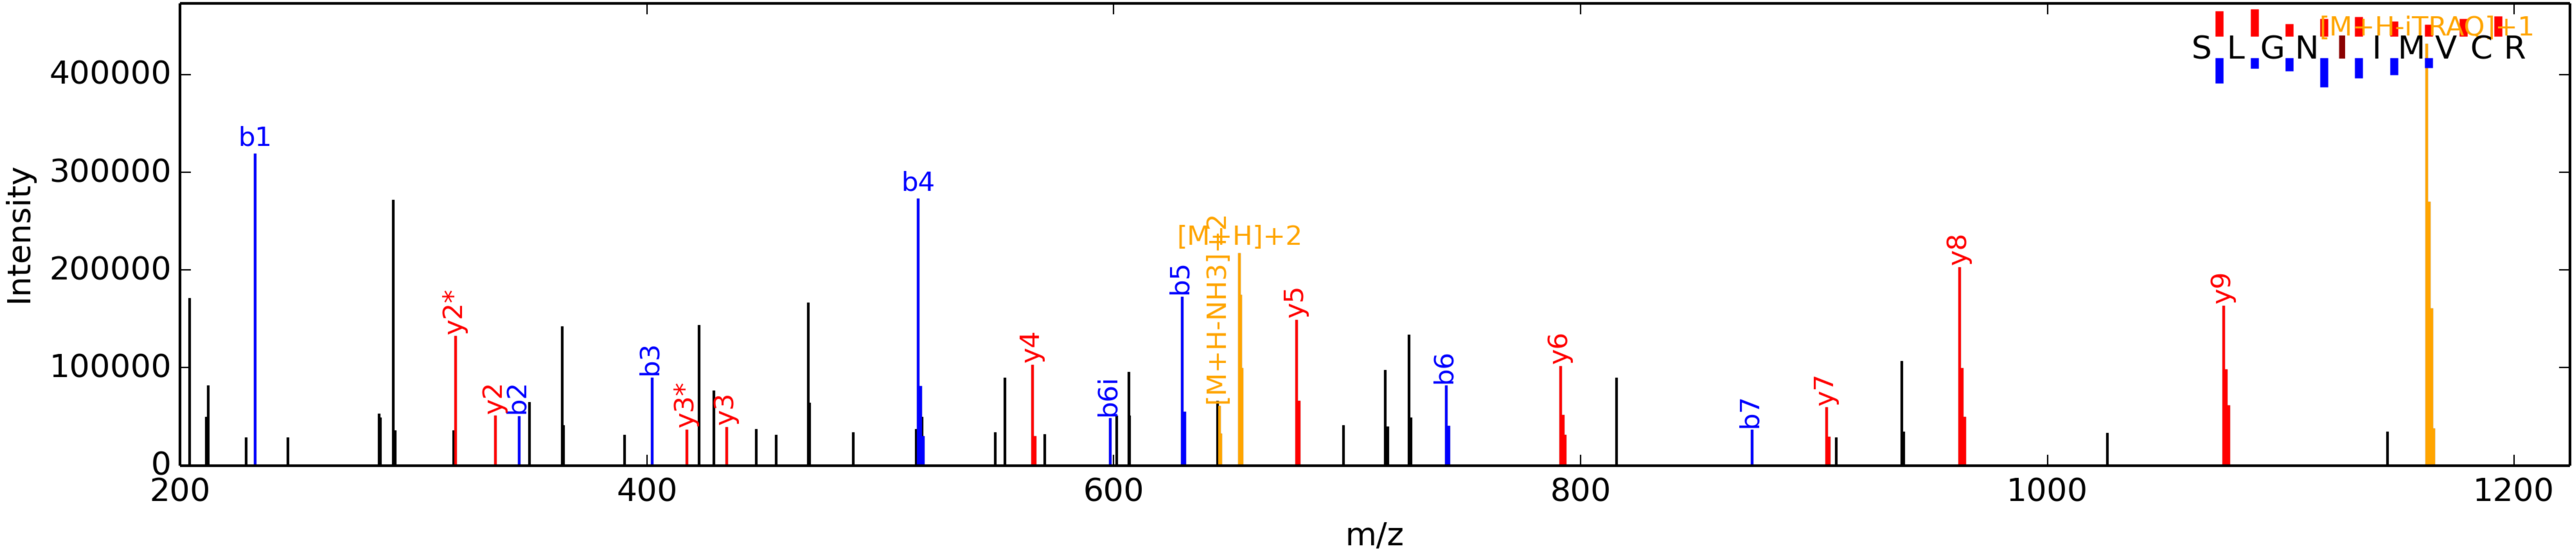

SLKEESIEAVK 144.10207@K3,144.10207@K11,144.10207@S1, 2+  
m= 1663.9722, matched intensity=84.8%, largest gap=0, sum gaps=0, gap at I7=0  
H20120525\_JQ\_CPTAC2\_Compref4\_protfxn16, scan:13863

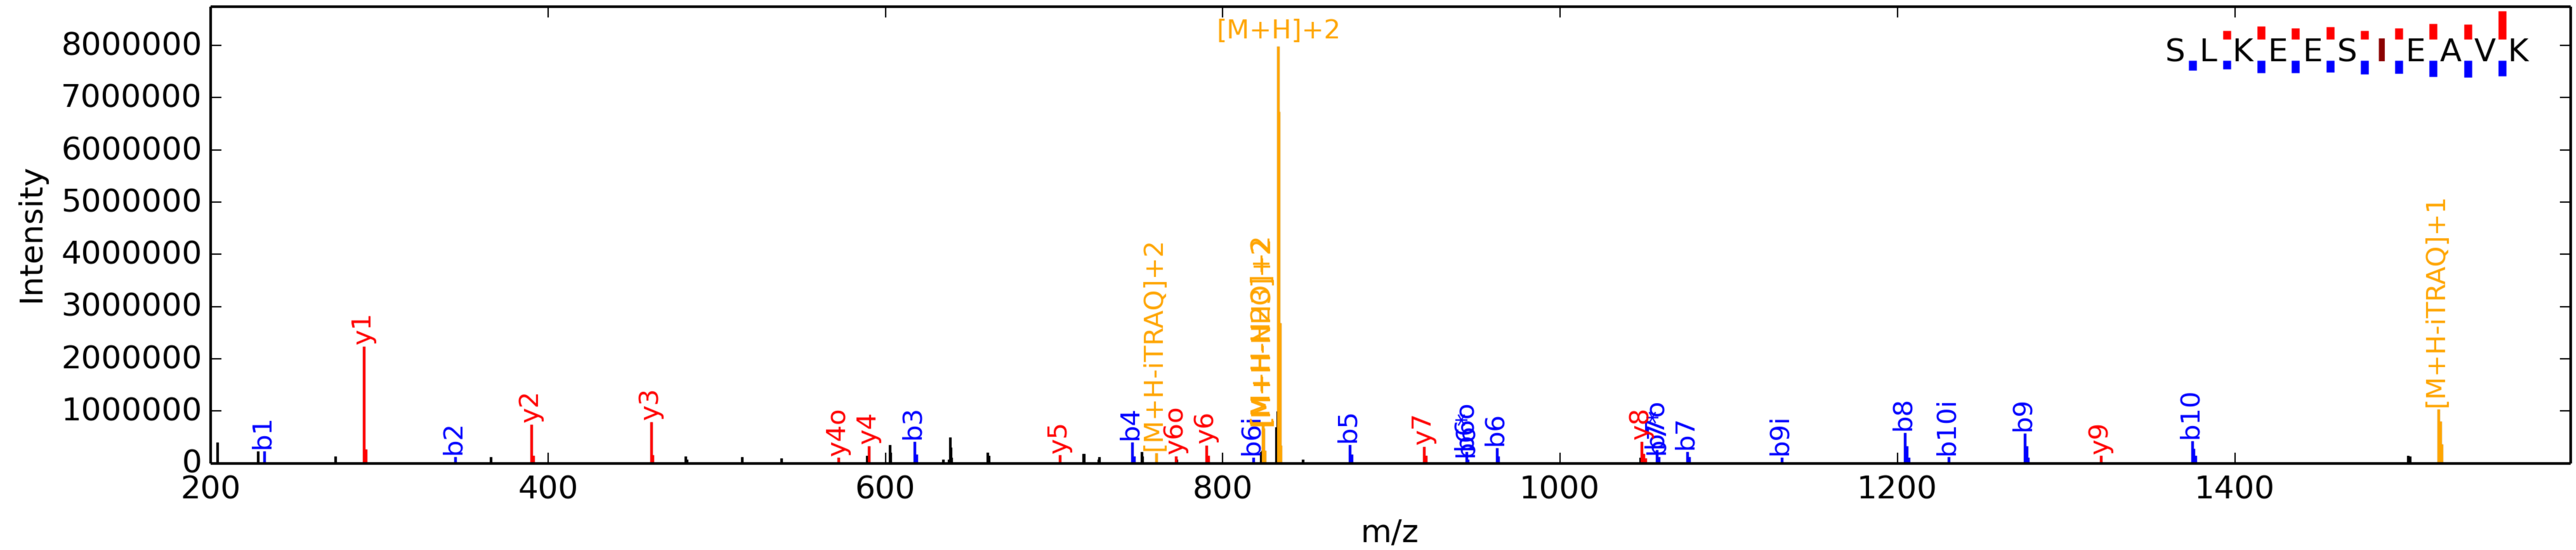



SLPEETVDFMVQHTSFK 144.10207@K17,144.10207@S1, 3+  
m= 2282.1497, matched intensity=70.8%, largest gap=1, sum gaps=1, gap at M10=0  
cptac\_p32p33\_global\_itraq4\_trypticpep\_fraction\_07, scan:12876

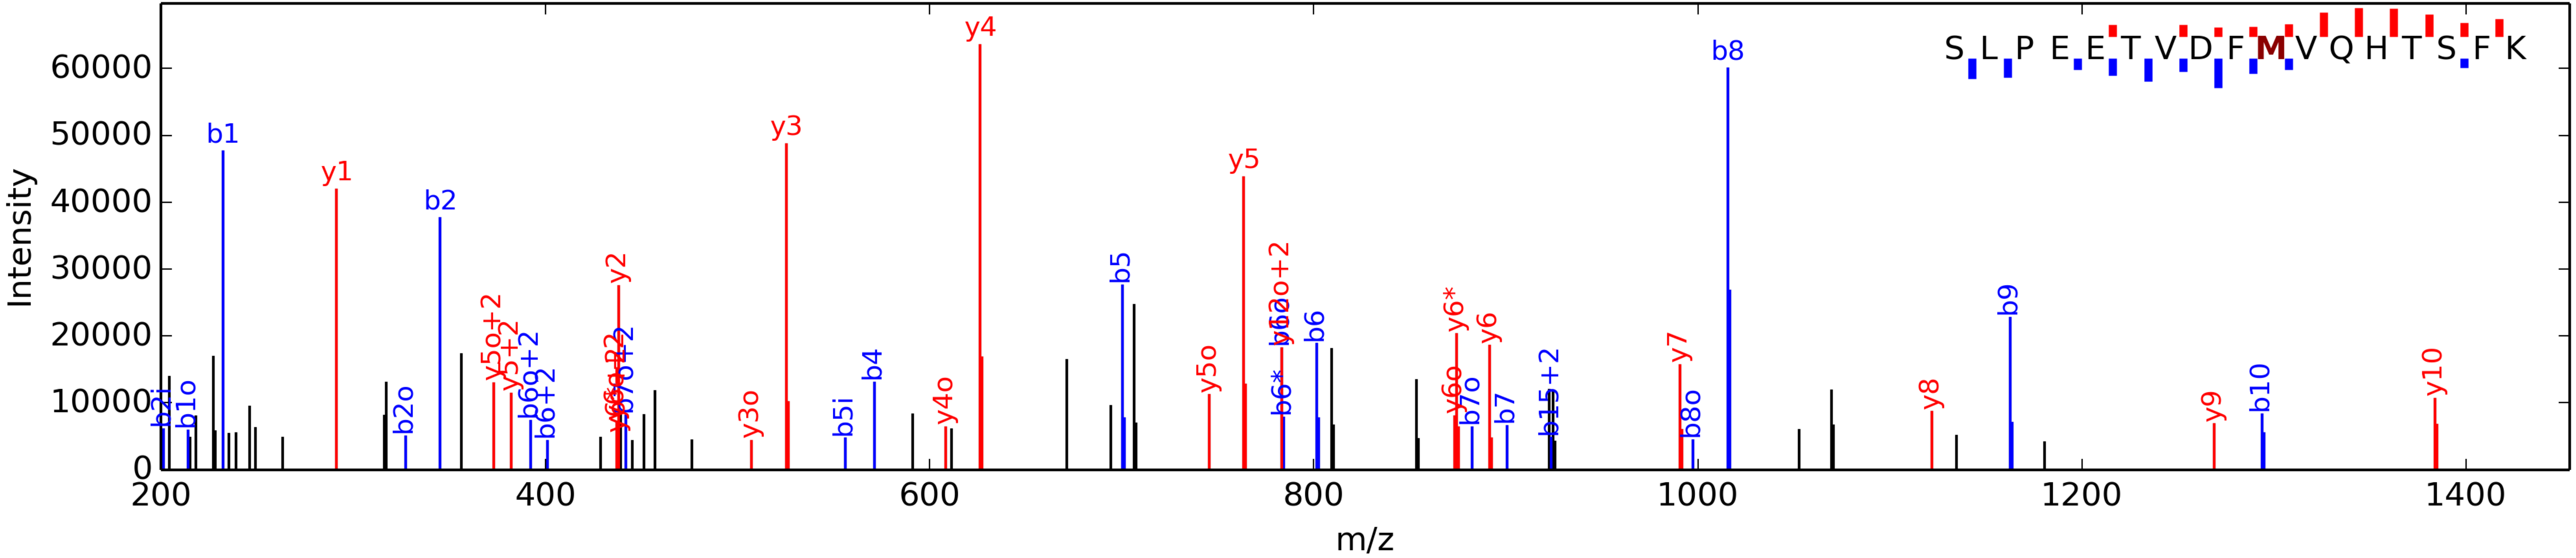

SLQAEPWFFG AIR 144.10207@S1, 3+

m= 1664.8797, matched intensity=68.1%, largest gap=0, sum gaps=0, gap at R13=0

CompRef\_P5-25\_P5-19\_P6-85\_P6-58\_W\_BI\_20130717\_f07, scan:35660

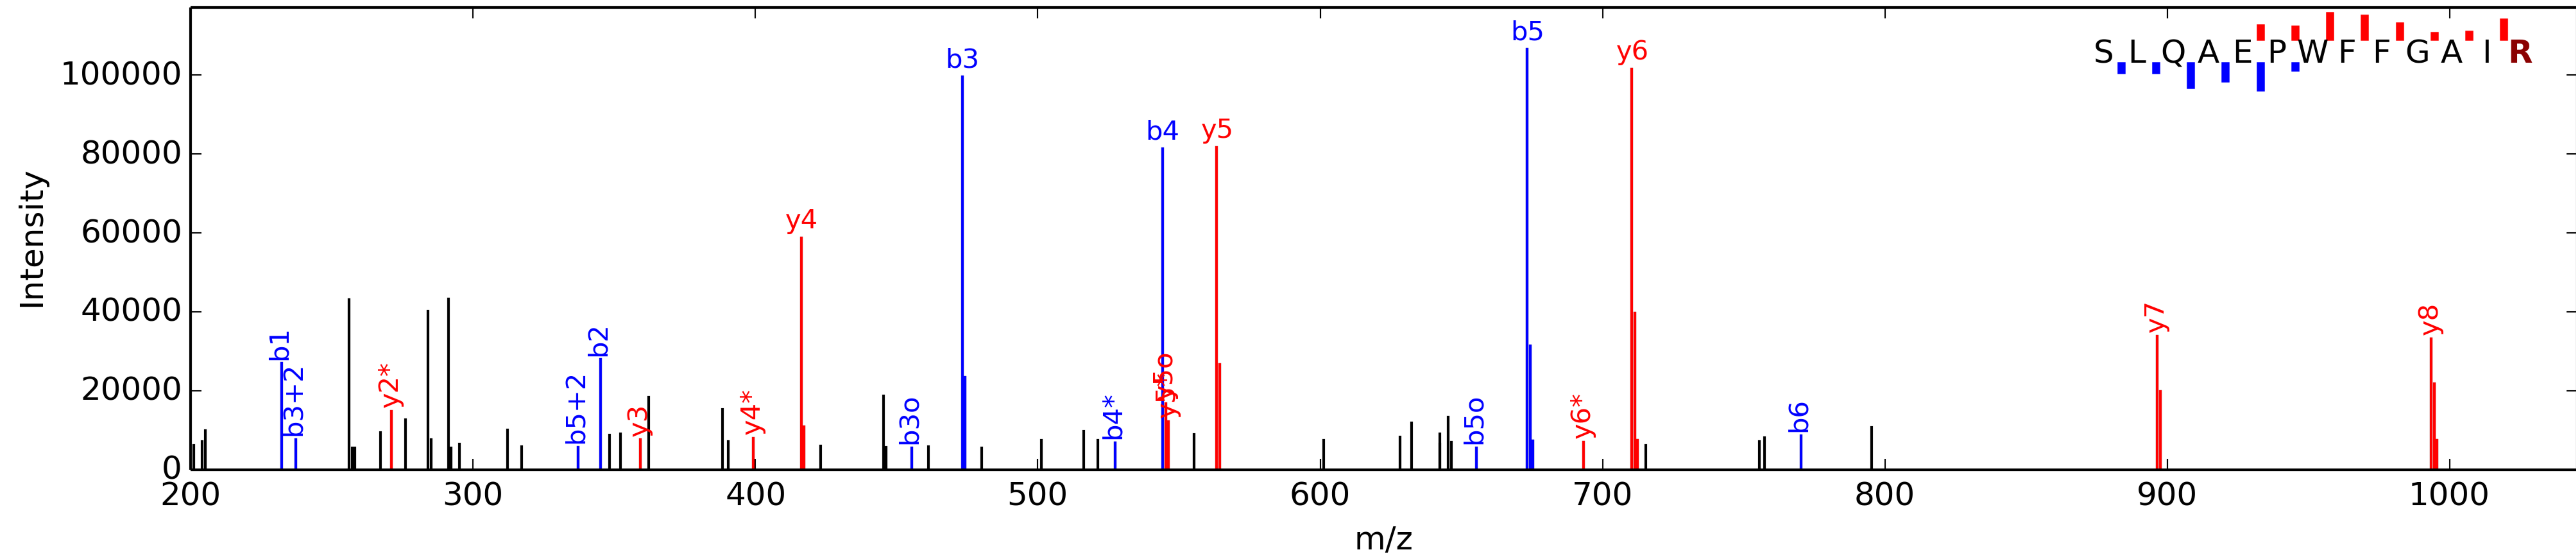

SLQEEQSRPTTAVSSPGGPAR 144.10207@S1, 3+  
 m= 2298.1686, matched intensity=87.0%, largest gap=1, sum gaps=3, gap at T10=0  
 CPTAC\_CompRef\_test\_iTRAQ\_19\_PD\_10Jan13\_Lynx\_12-11-08, scan:1592

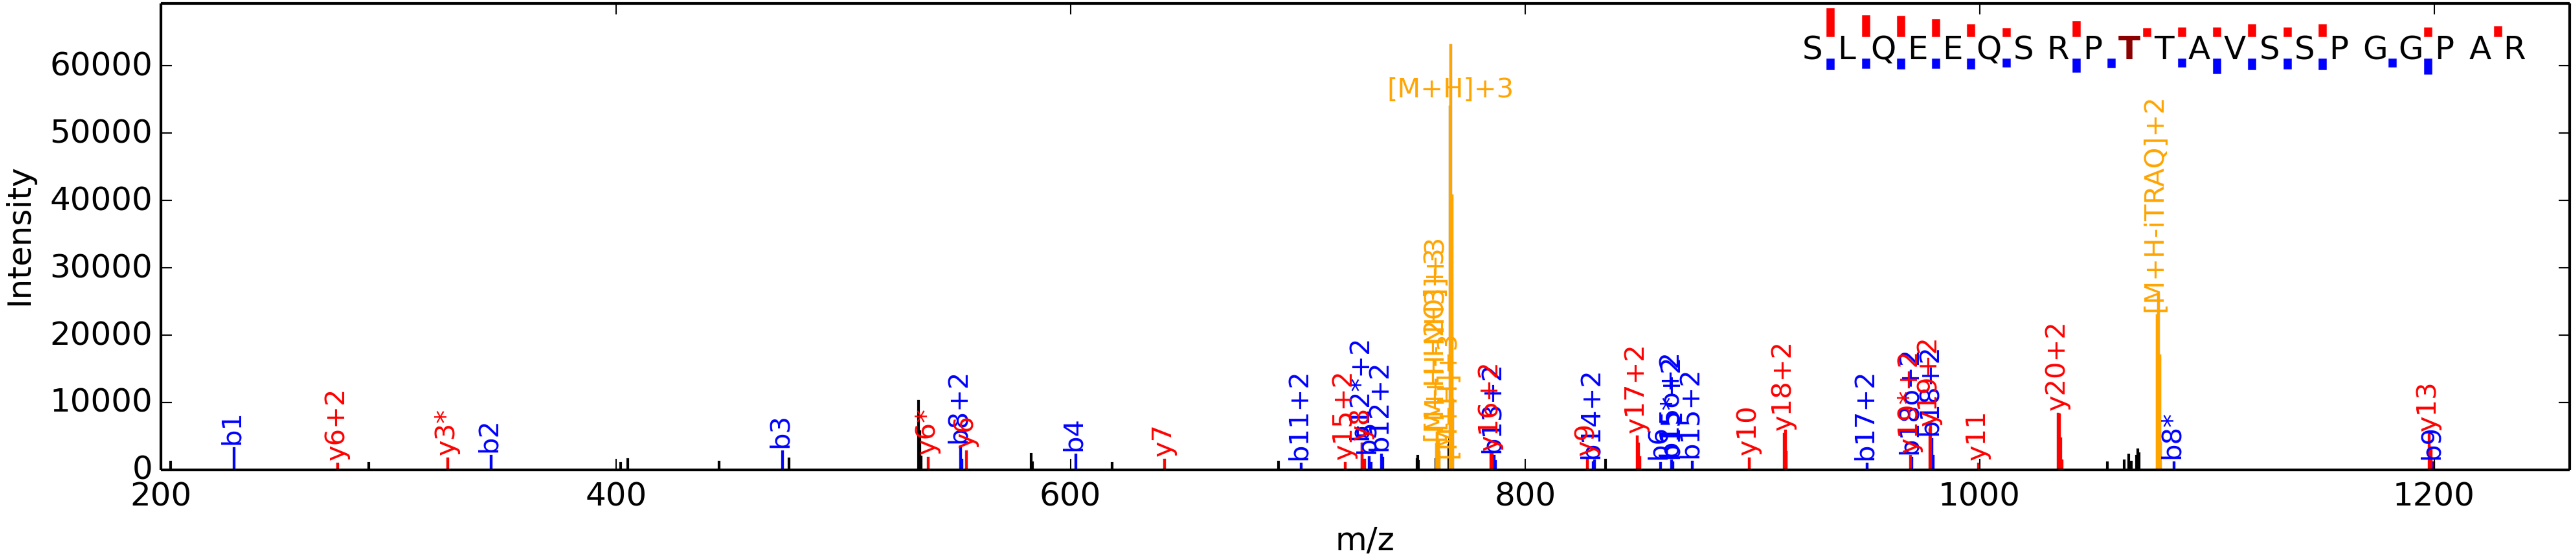



SLQSPQEIILAPSLAK 144.10207@K17,144.10207@S1, 3+  
m= 2110.2242, matched intensity=71.3%, largest gap=1, sum gaps=1, gap at Q3=0  
CompRef\_P5-25\_P5-19\_P6-85\_P6-58\_W\_BI\_20130717\_f14, scan:28272

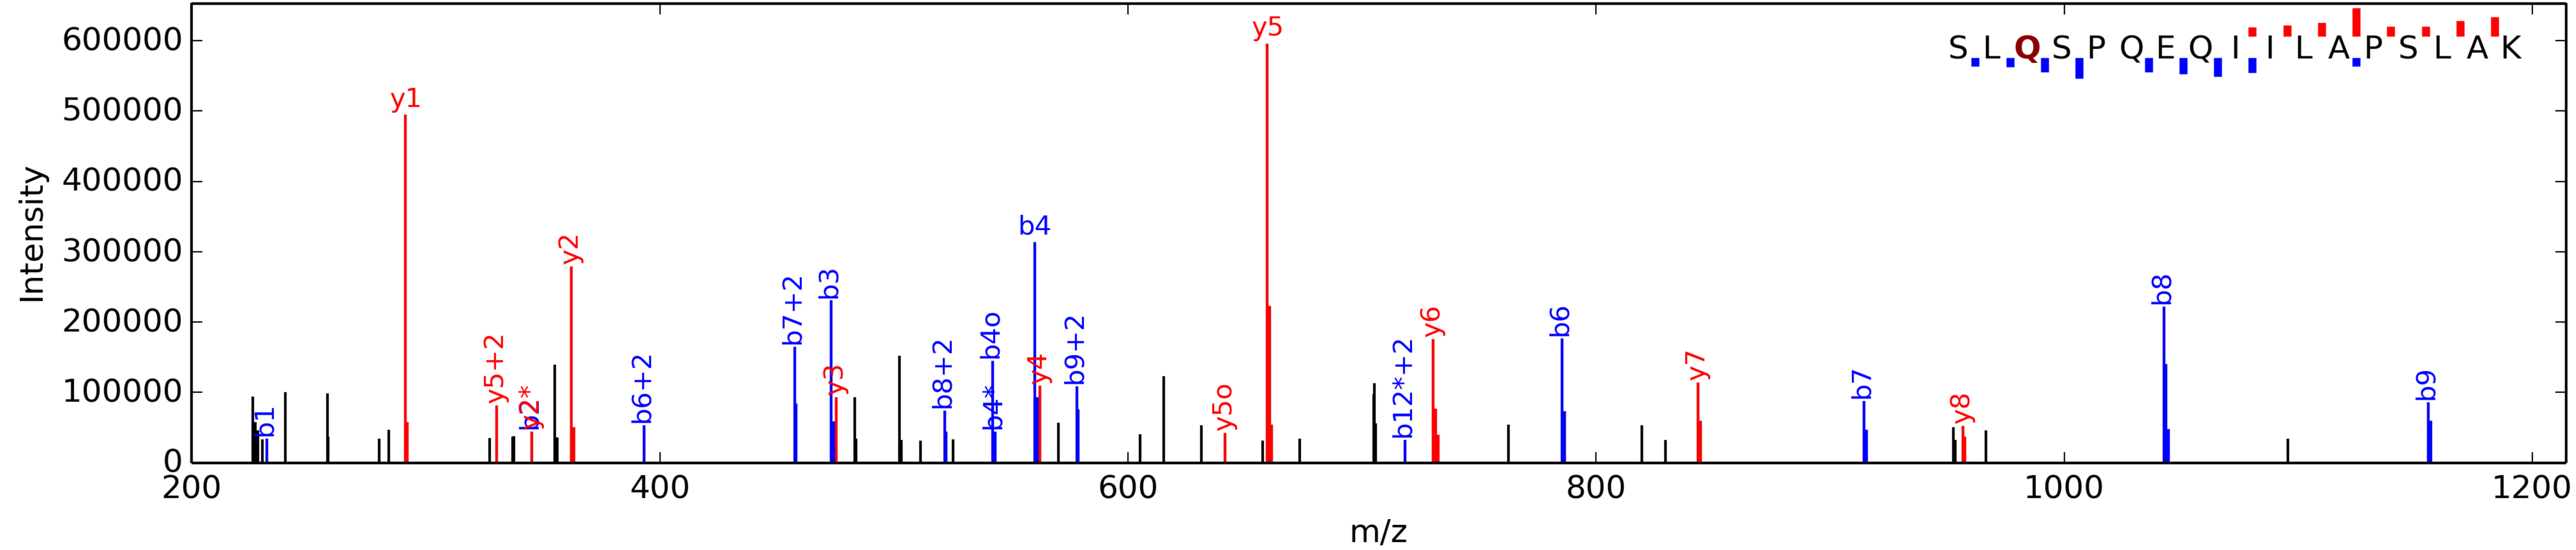

SLQTISSWFK 144.10207@K10,144.10207@S1, 3+  
m= 1483.8279, matched intensity=76.7%, largest gap=0, sum gaps=0, gap at S6=0  
CompRef\_2B\_P5-29\_P5-61\_P6-34\_P6-38\_W\_BI\_20130503\_H-JQ\_f09, scan:29836

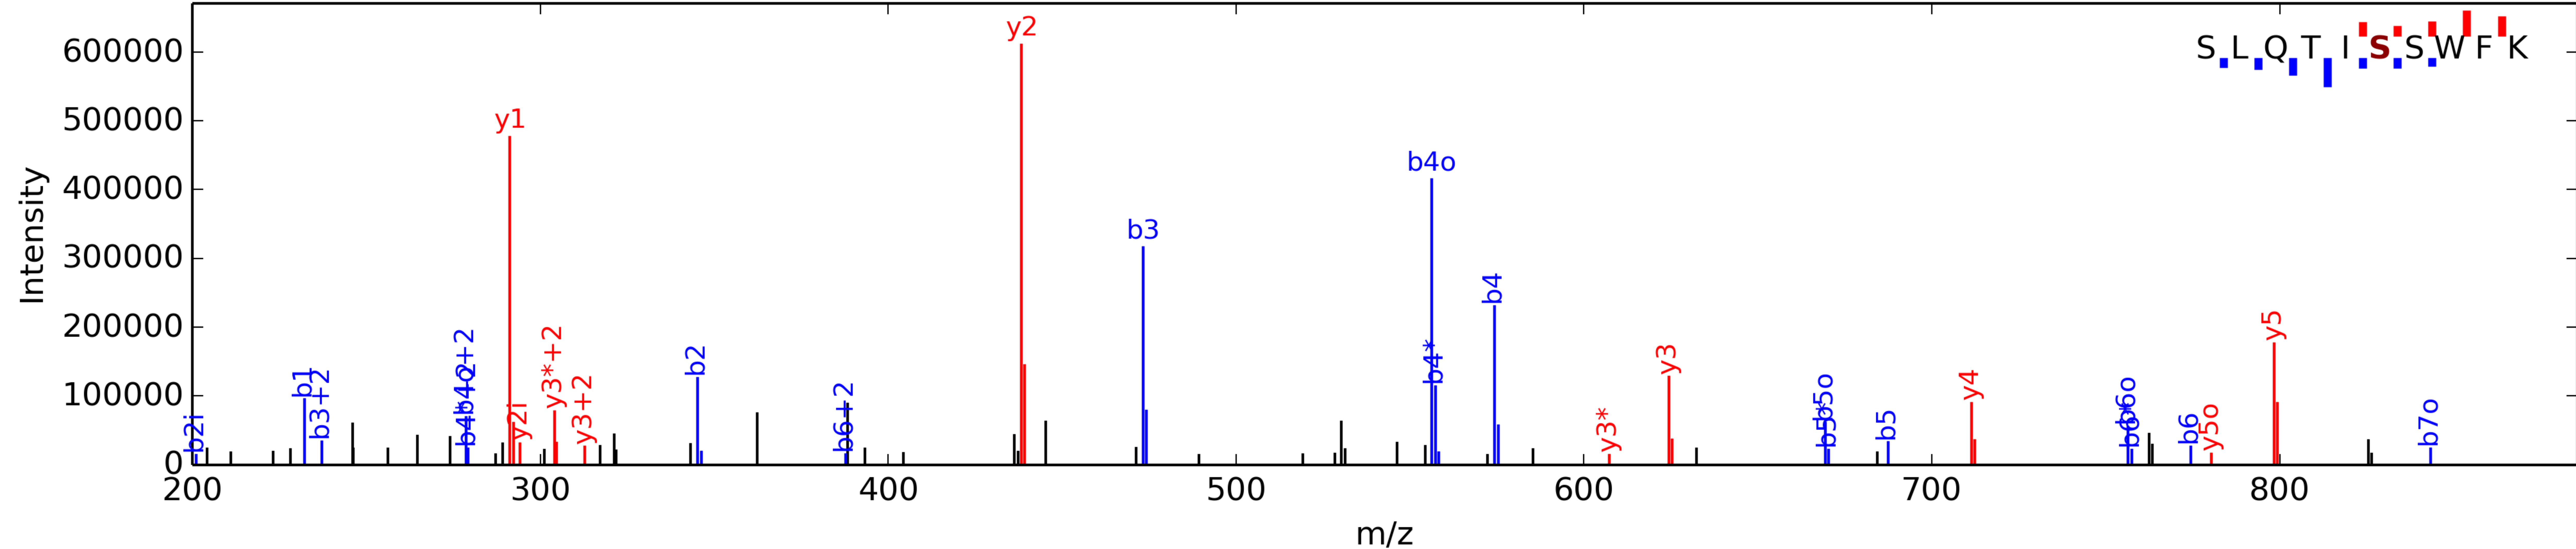

SLTEEMALGEPAAAAAALLGEEI 144.10207@S1, 3+  
m= 2457.2431, matched intensity=69.3%, largest gap=2, sum gaps=4, gap at G9=0  
CompRef\_P5-65\_P6-20\_P5-71\_P6-62\_W\_BI\_20131120\_f10, scan:40947

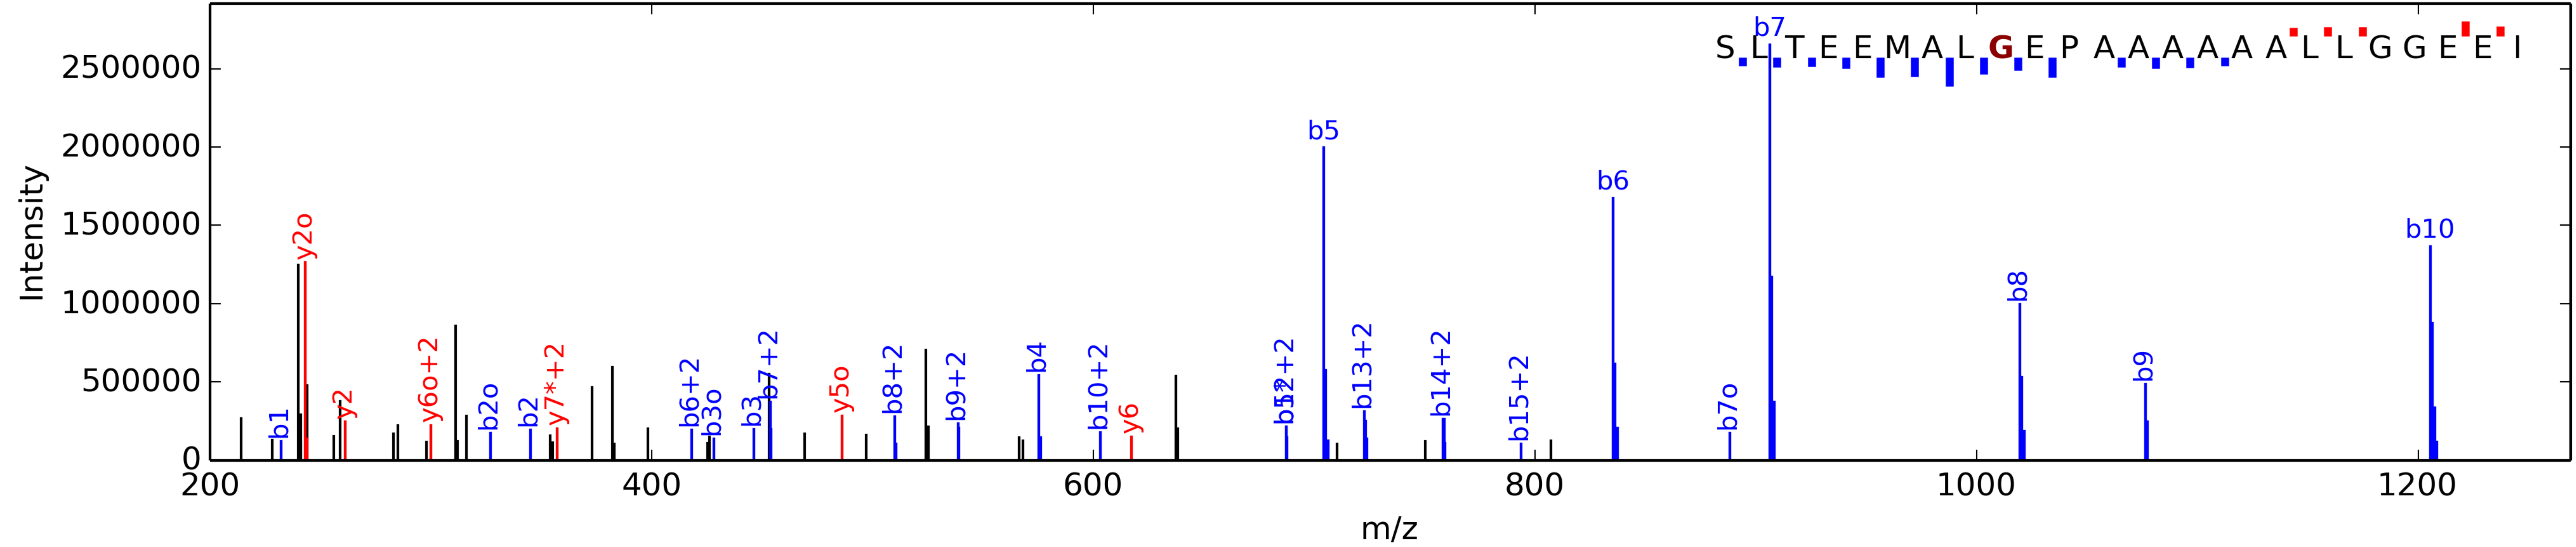



SLVQESLSTNSSDLVAPSPDAFR 144.10207@S1,79.96633@S18, 3+  
 m= 2643.2551, matched intensity=72.6%, largest gap=1, sum gaps=4, gap at E5=0  
 CPTAC\_CompREF\_00\_iTRAQ\_NiNTA\_09b\_26Mar12\_Lynx\_12-02-31, scan:19335

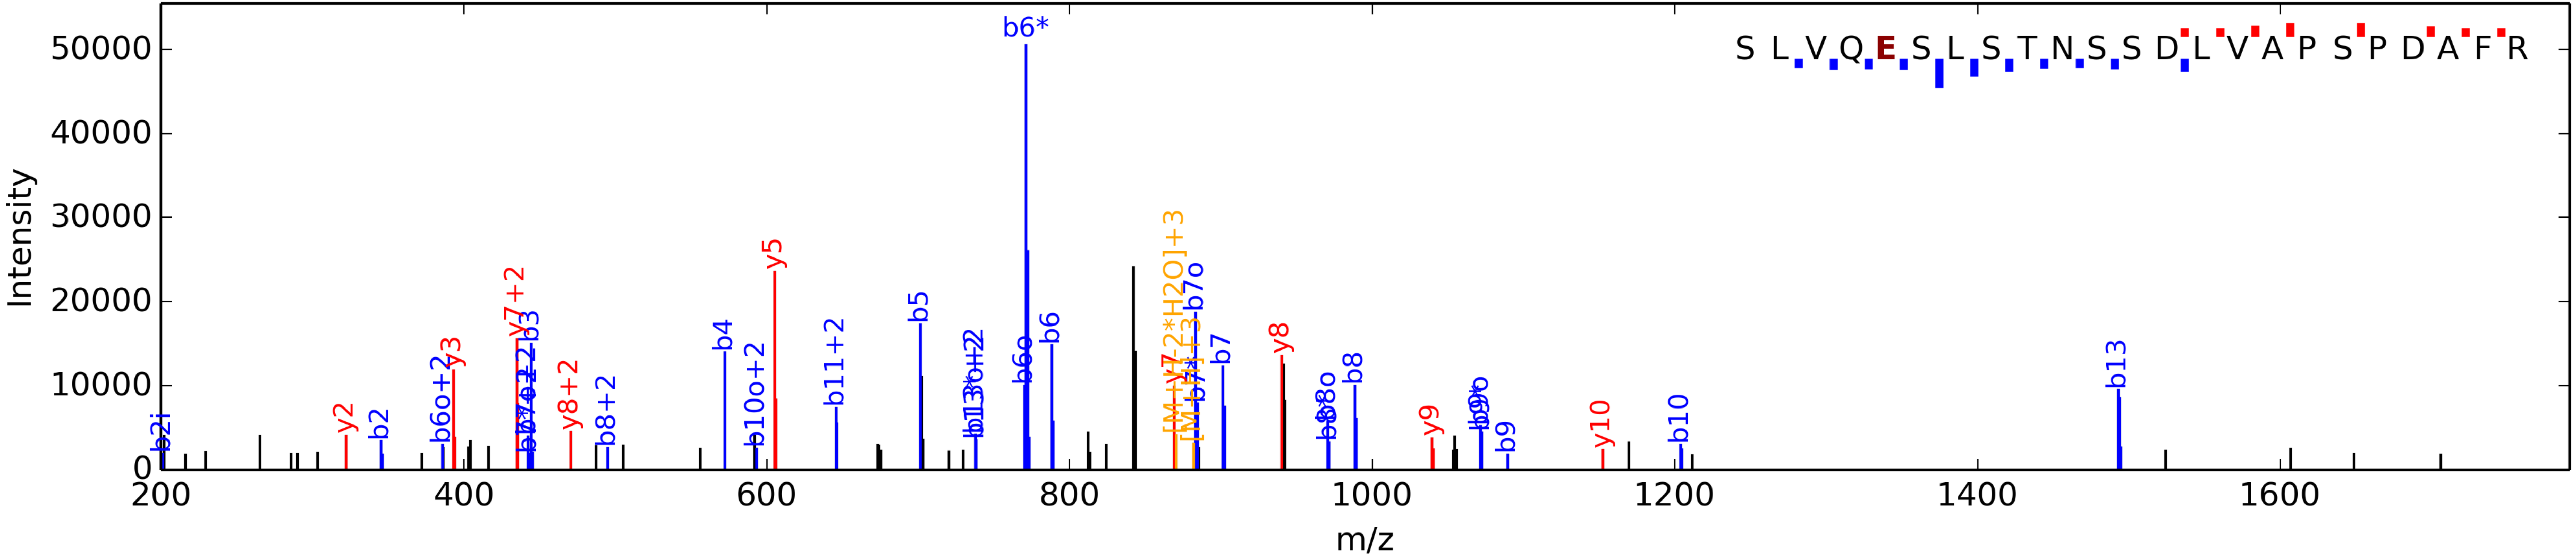

SMQDVVDFKNKYEDEINR 144.10207@K10,144.10207@K12,144.10207@S1, 3+  
 m= 2790.3860, matched intensity=88.2%, largest gap=0, sum gaps=0, gap at R19=0  
 TCGA\_CompRef\_W\_PNNL\_B2S7\_f23, scan:11285

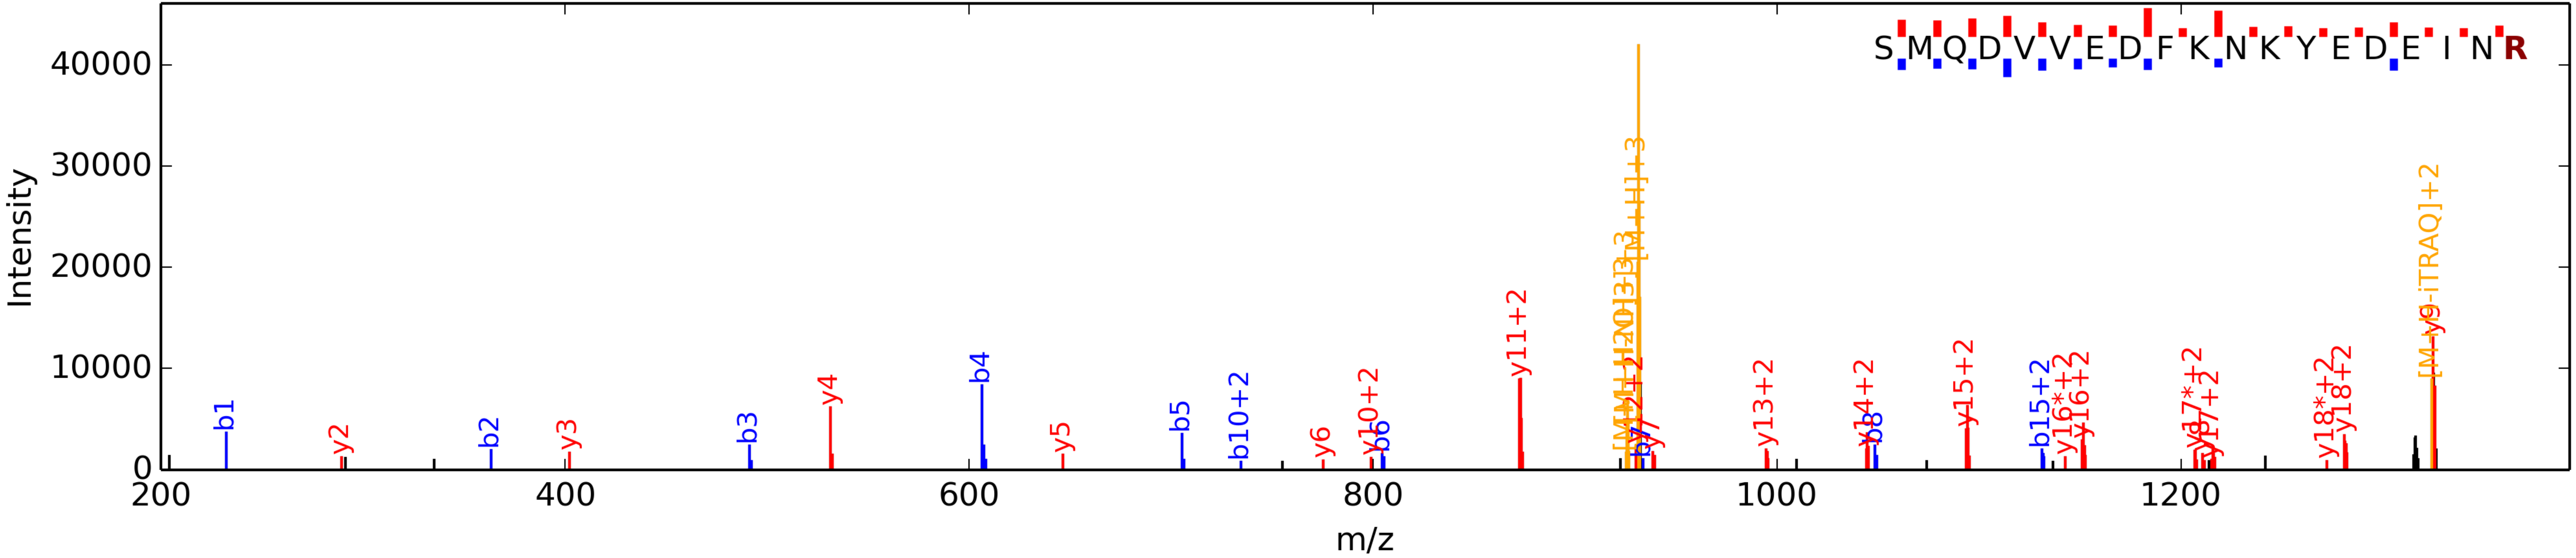

SNFLVVCYLHDVK 57.02200@C7,144.10207@K13,144.10207@S1, 3+  
m= 1881.0068, matched intensity=79.1%, largest gap=0, sum gaps=0, gap at V6=0  
cptac\_p32p33\_global\_itraq4\_trypticpep\_fraction\_17, scan:10583

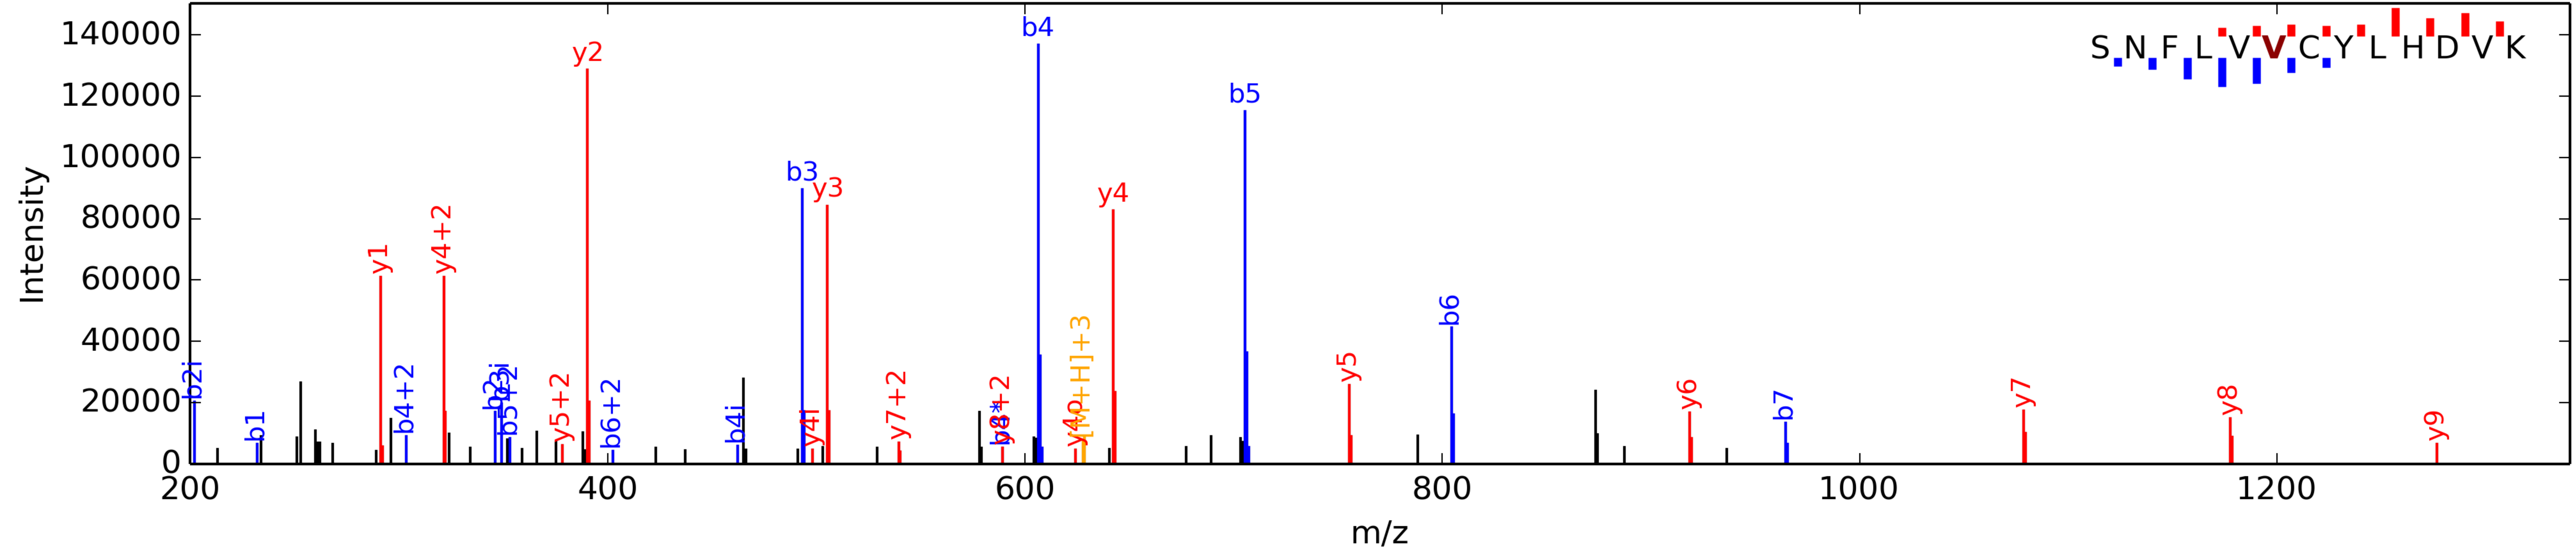



SPADPTDLGGQTSPR 144.10207@S1, 2+  
m= 1641.8080, matched intensity=79.6%, largest gap=0, sum gaps=0, gap at T6=0  
cptac\_p5p6\_w\_pool\_jhu\_05172013\_f16, scan:5147

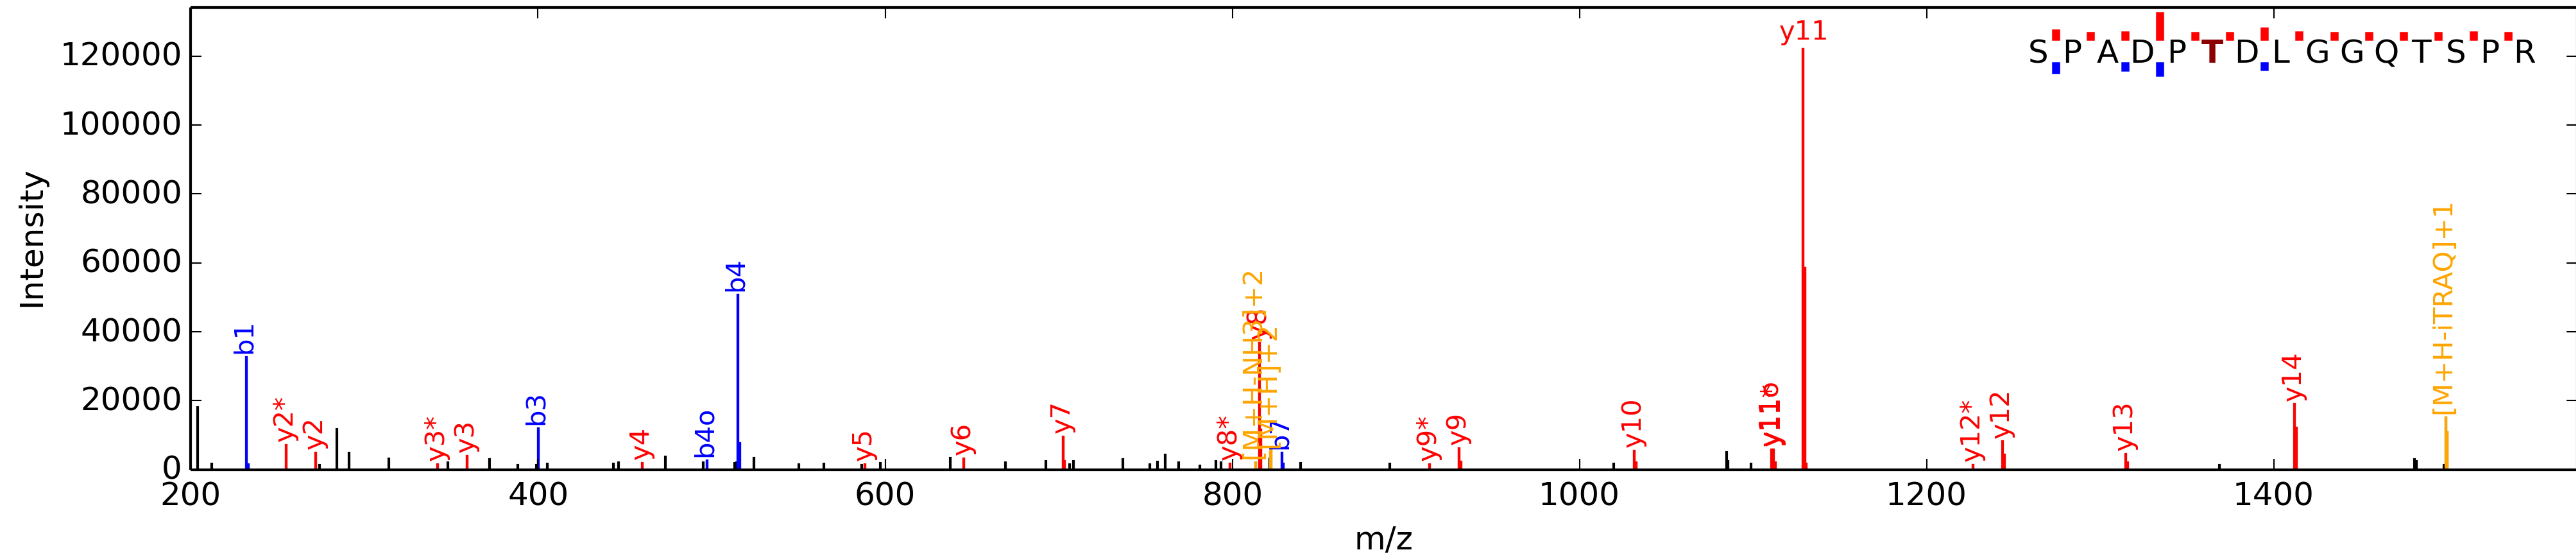

SPAINLMGFNVEEMCEAHAWIQR 57.02200@C15,144.10207@S1, 3+  
m= 2846.3430, matched intensity=68.3%, largest gap=0, sum gaps=0, gap at C15=0  
CompRef\_P5-65\_P6-20\_P5-71\_P6-62\_W\_BI\_20131120\_f02, scan:34308

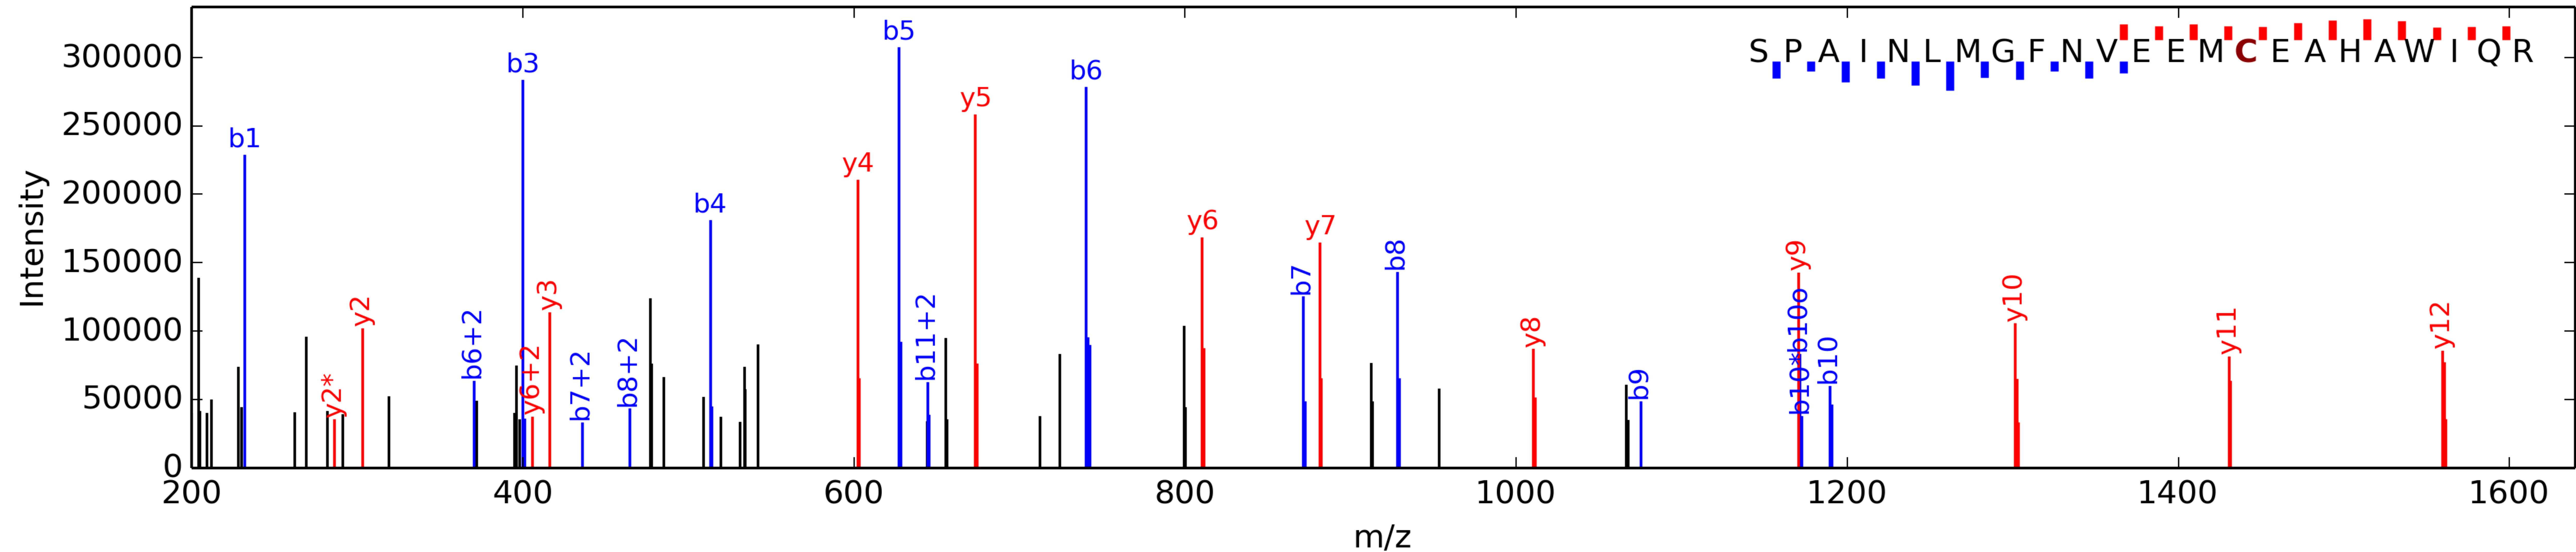

SPAPGMALGSGR 144.10207@S1, 2+

m= 1243.6465, matched intensity=79.0%, largest gap=0, sum gaps=0, gap at P2=0

CompRef\_P5-65\_P6-20\_P5-71\_P6-62\_W\_BI\_20131120\_f02, scan:10696

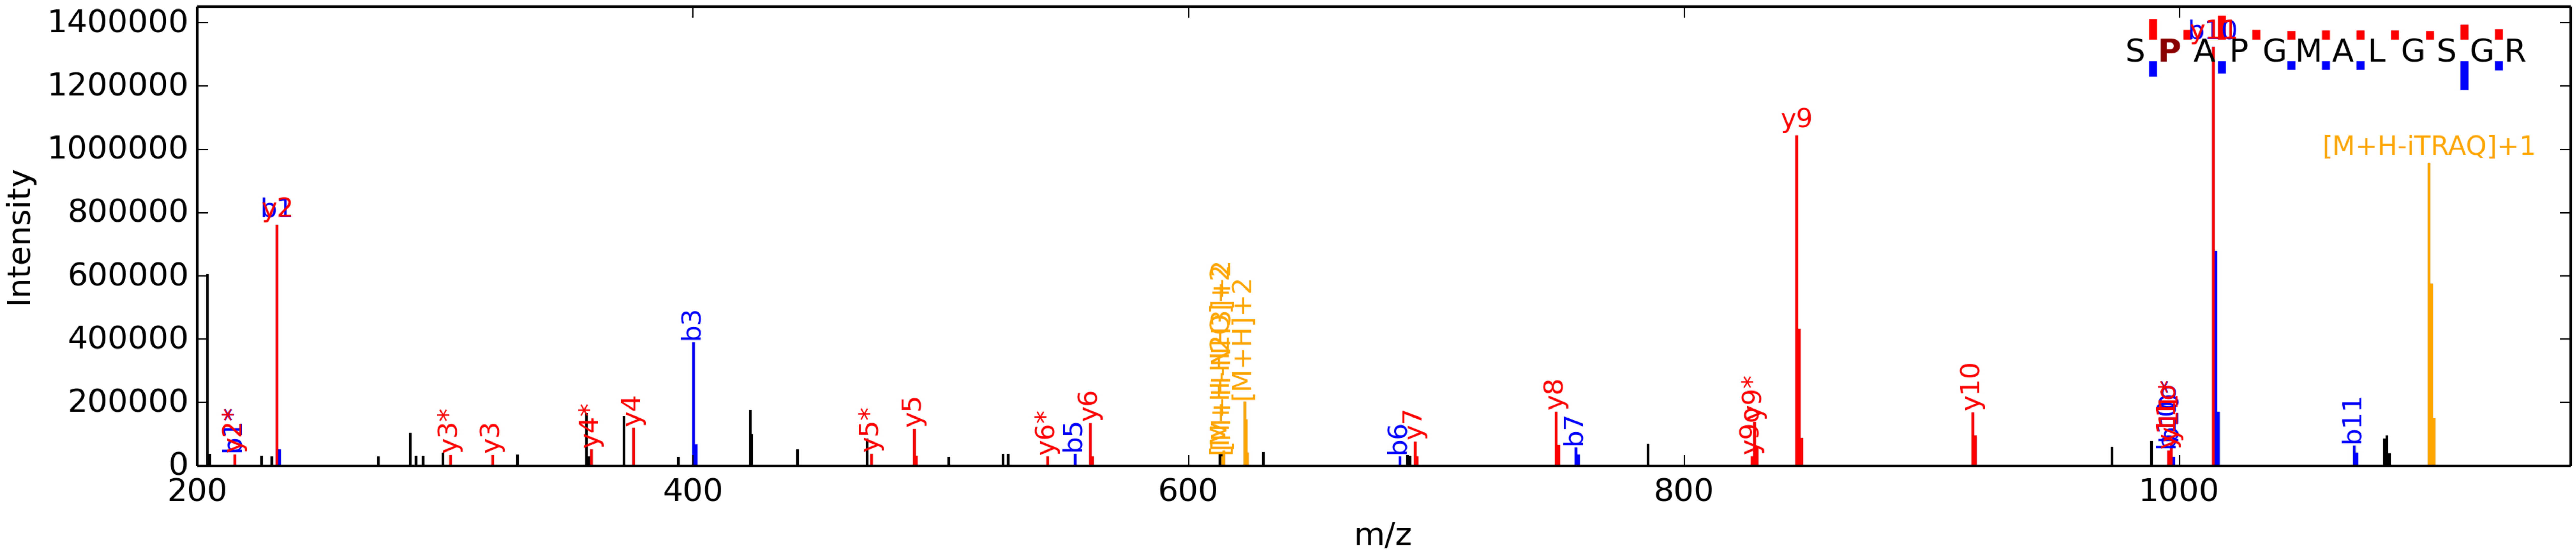



SPAPGMALGSGRR 144.10207@S1, 3+

m= 1399.7476, matched intensity=63.8%, largest gap=2, sum gaps=2, gap at P2=0

CompRef\_2B\_P5-29\_P5-61\_P6-34\_P6-38\_W\_BI\_20130503\_H-JQ\_f07, scan:8005

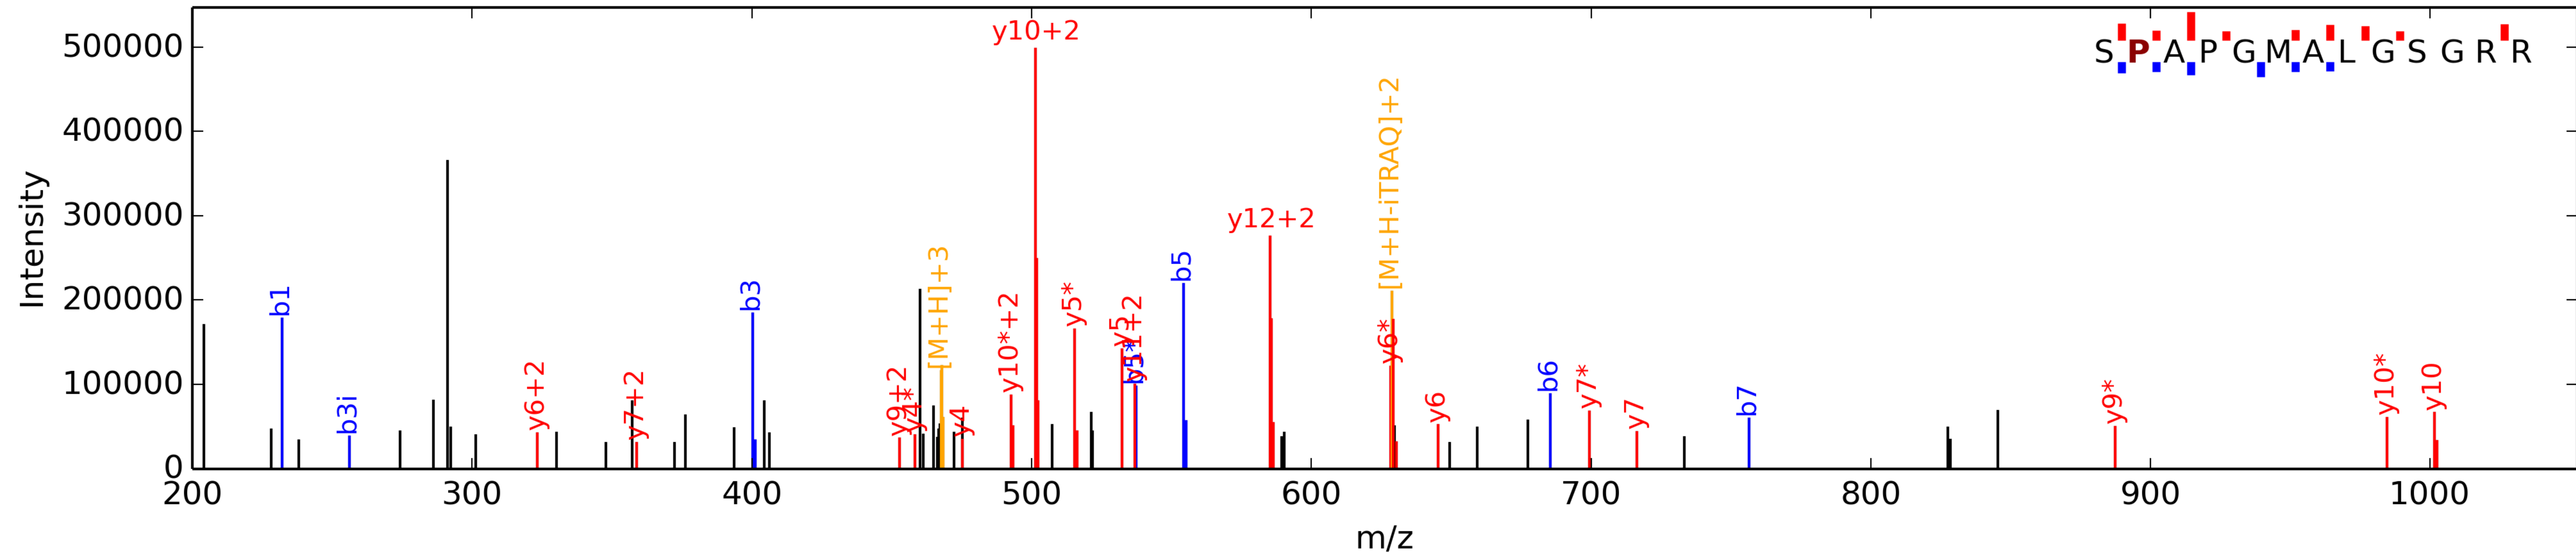

SPLYSVEFSEEPFGVIVHR 144.10207@S1, 3+  
m= 2335.1970, matched intensity=79.9%, largest gap=0, sum gaps=0, gap at H18=0  
CPTAC\_CompRef\_test\_iTRAQ\_14\_PD\_7Jan13\_Lynx\_12-11-08, scan:11246

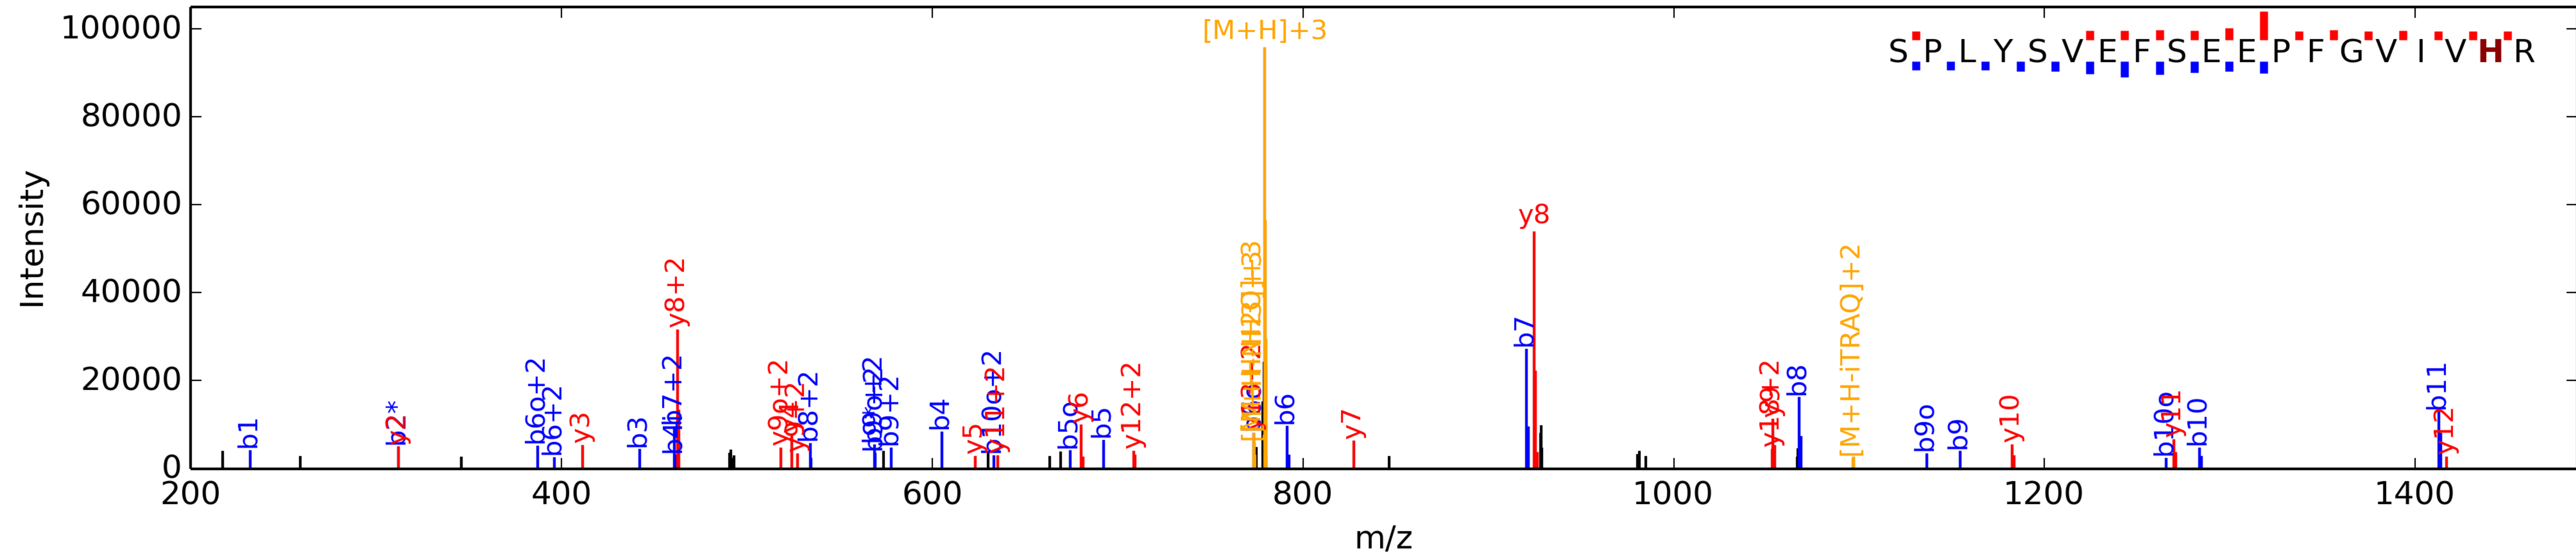

SPPGAAAPAAKPPPLSAK 144.10207@K12,144.10207@K19,144.10207@S1, 3+  
m= 2130.2527, matched intensity=58.3%, largest gap=1, sum gaps=3, gap at P8=1  
CompRef\_P5-65\_P6-20\_P5-71\_P6-62\_W\_BI\_20131120\_f06, scan:13895

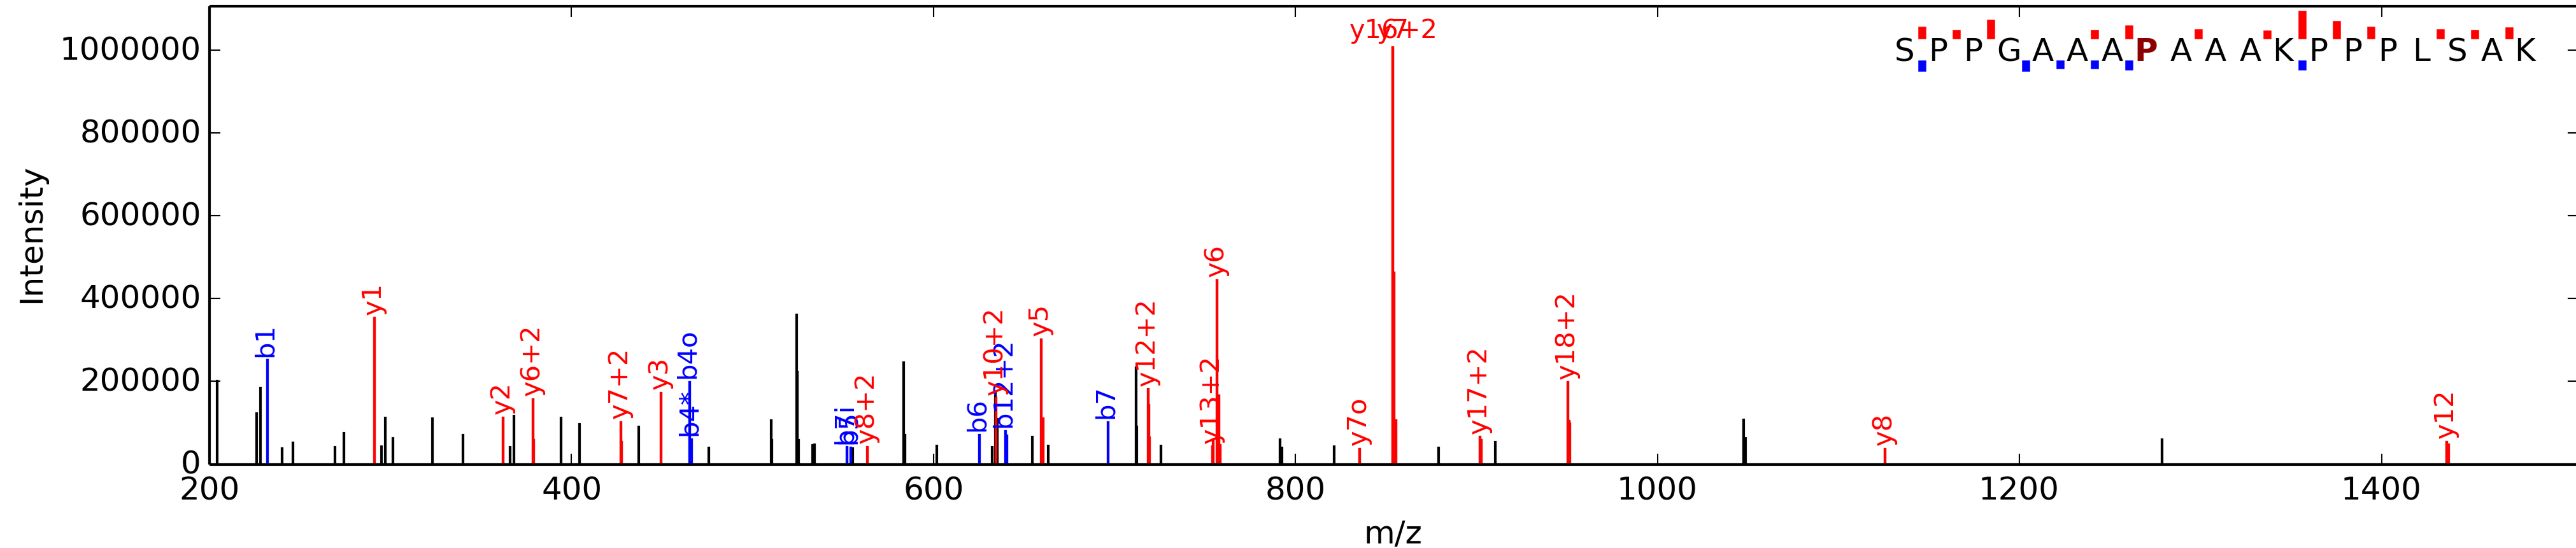



SQDKDVSEGETSDGVR 144.10207@K4,144.10207@S1, 3+  
 m= 1995.9589, matched intensity=60.9%, largest gap=2, sum gaps=4, gap at S7=0  
 cptac\_p5p6\_w\_pool\_jhu\_05172013\_f4, scan:2256

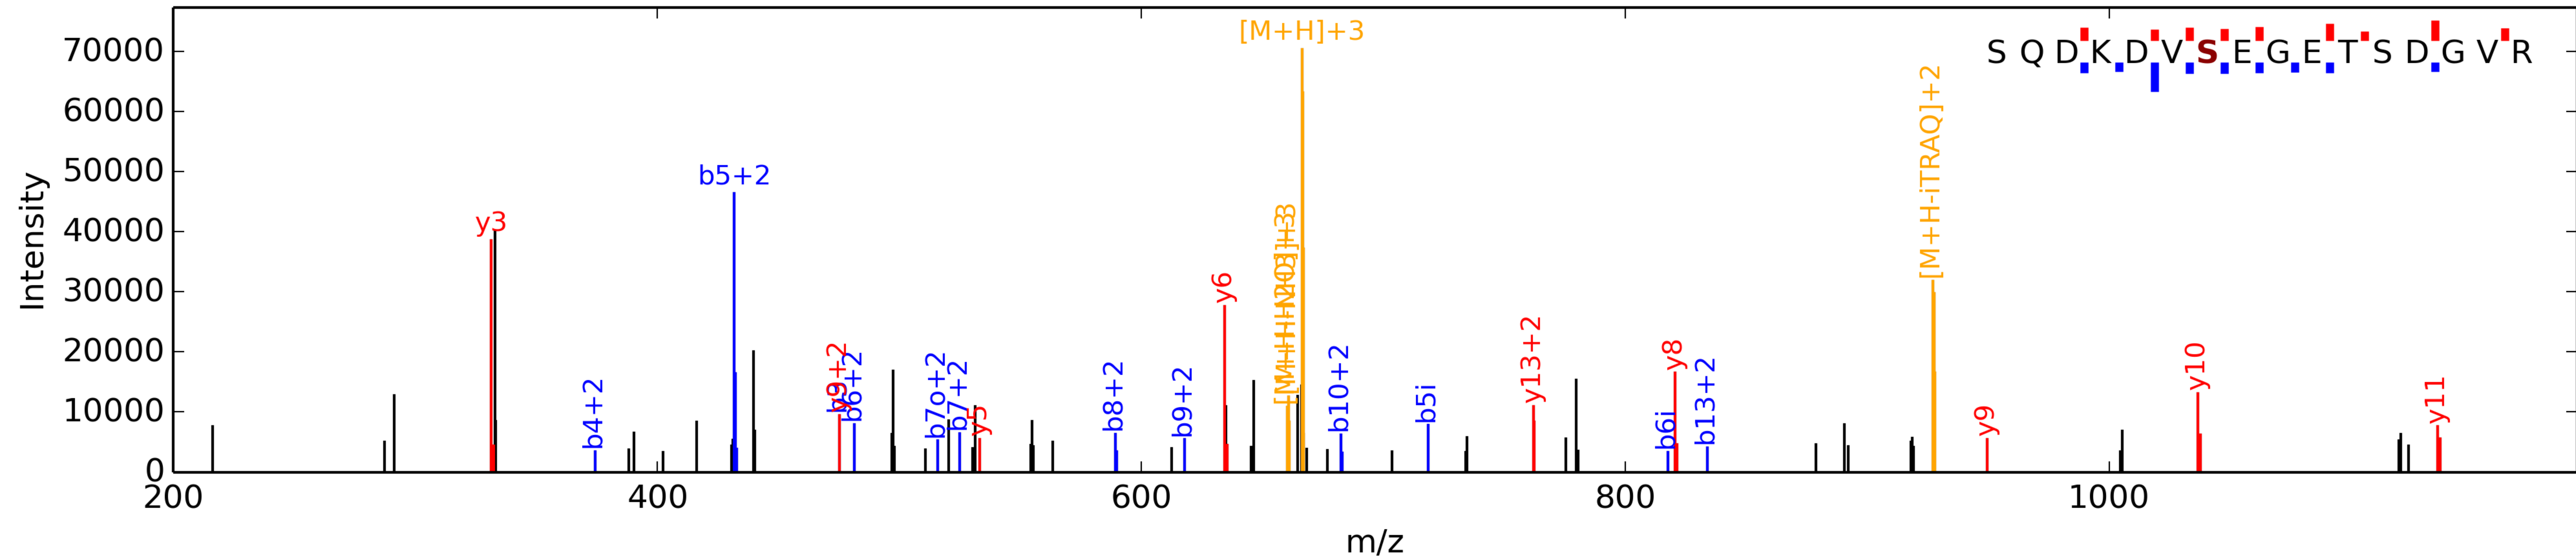

SQNKEDYDGLK 144.10207@K4,144.10207@K11,144.10207@S1, 2+  
m= 1727.9056, matched intensity=87.5%, largest gap=0, sum gaps=0, gap at D8=0  
CompRef\_2B\_P5-29\_P5-61\_P6-34\_P6-38\_W\_BI\_20130503\_H-JQ\_f12, scan:6536

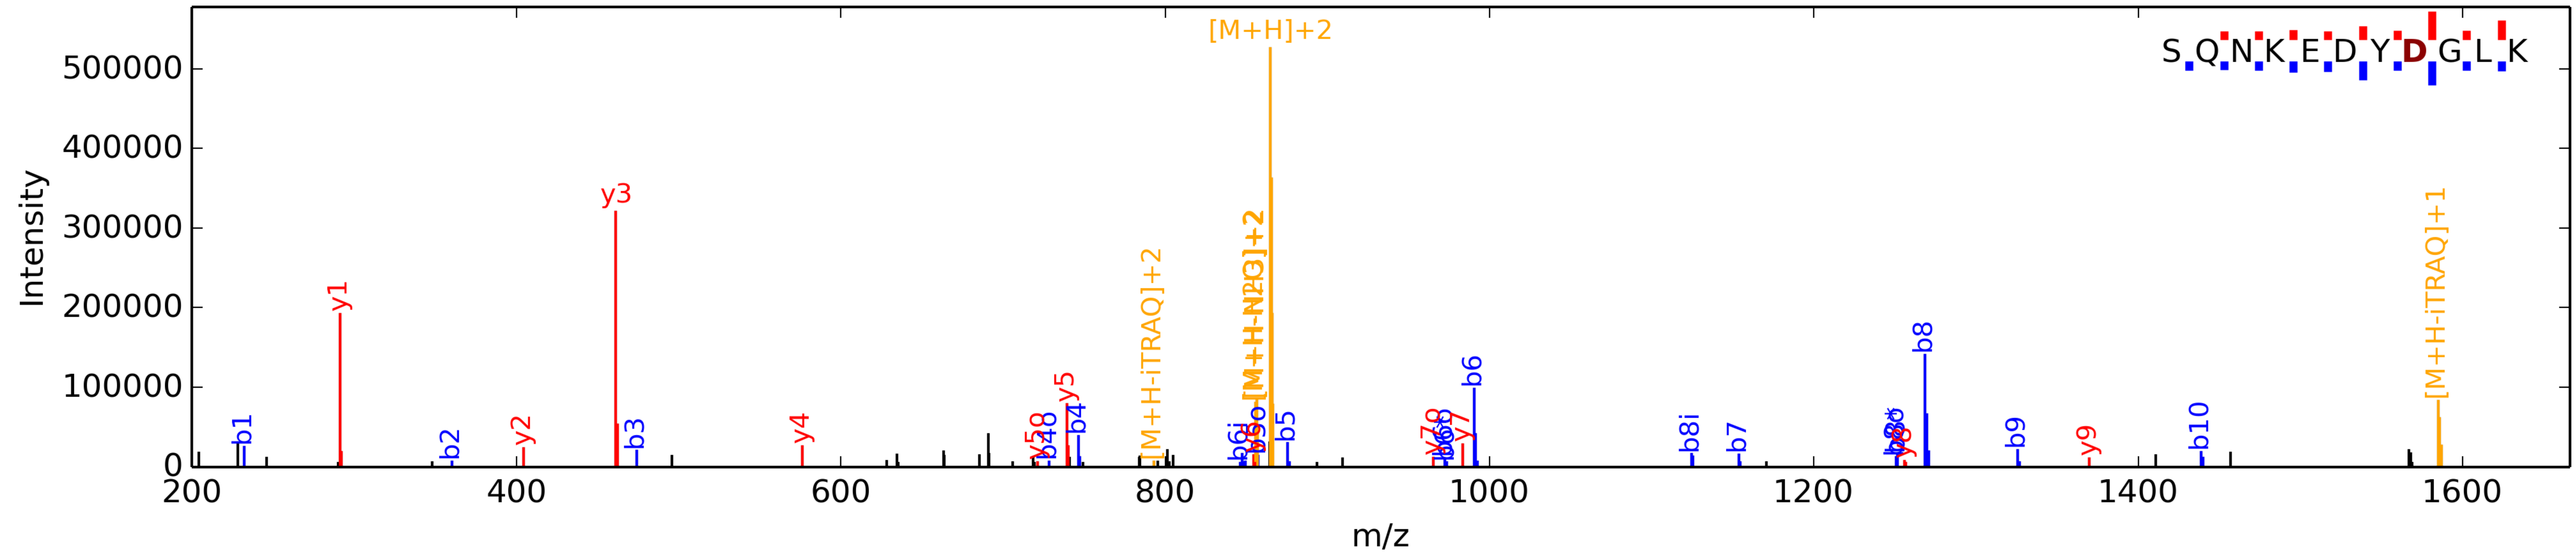

SQNKEDYDGLKEEFRK 144.10207@K4,144.10207@K11,144.10207@K16,144.10207@S1, 3+  
 m= 2561.3573, matched intensity=87.6%, largest gap=1, sum gaps=2, gap at D8=1  
 cptac\_p5p6\_w\_itraq4\_jhu\_04292013\_f4, scan:5181

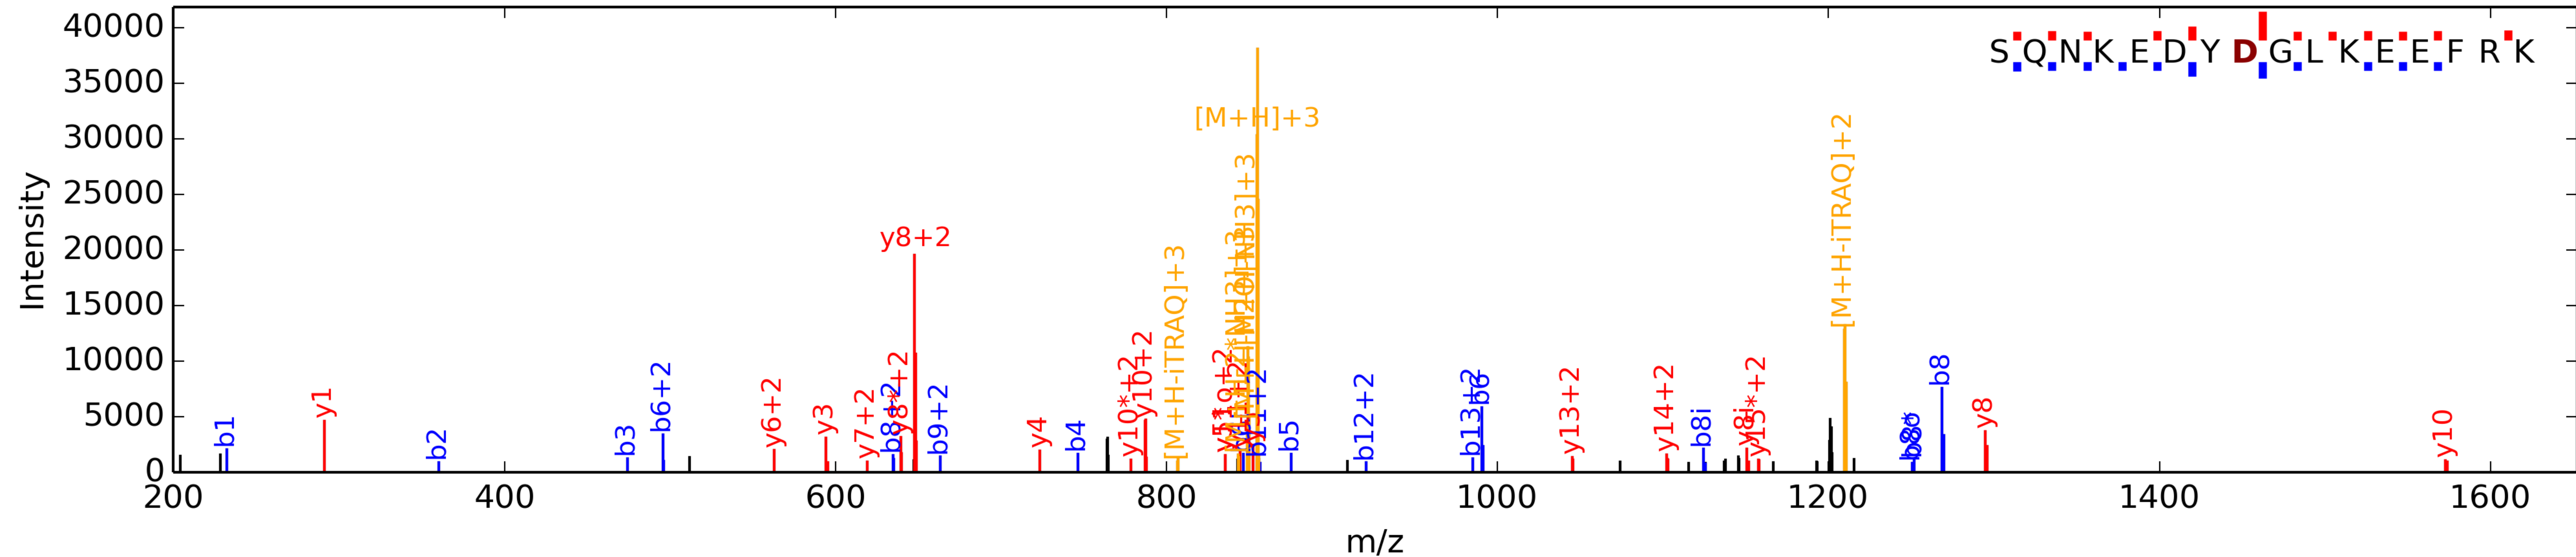



SQPAASTLESESVQR 144.10207@S1, 2+  
m= 1732.8713, matched intensity=75.5%, largest gap=0, sum gaps=0, gap at E11=0  
CPTAC\_CompRef\_00\_iTRAQ\_20\_2Feb12\_Cougar\_11-10-11, scan:4235

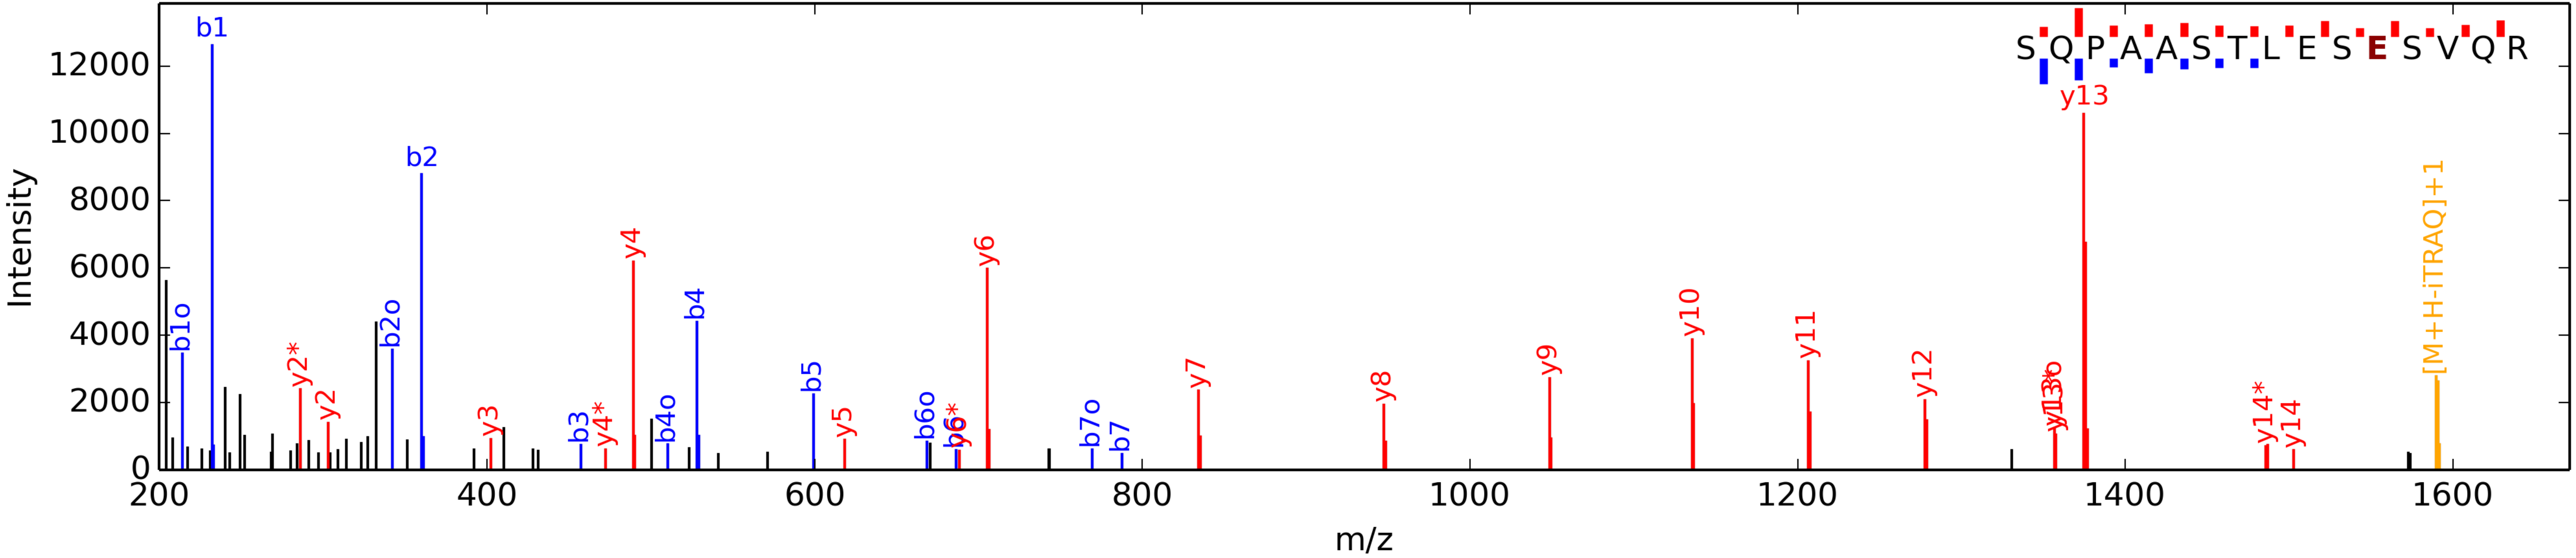

SRLELELQIR 144.10207@S1, 3+  
m= 1399.8269, matched intensity=82.3%, largest gap=0, sum gaps=0, gap at I9=0  
H20120525\_JQ\_CPTAC2\_Compref4\_protfxn10, scan:21813

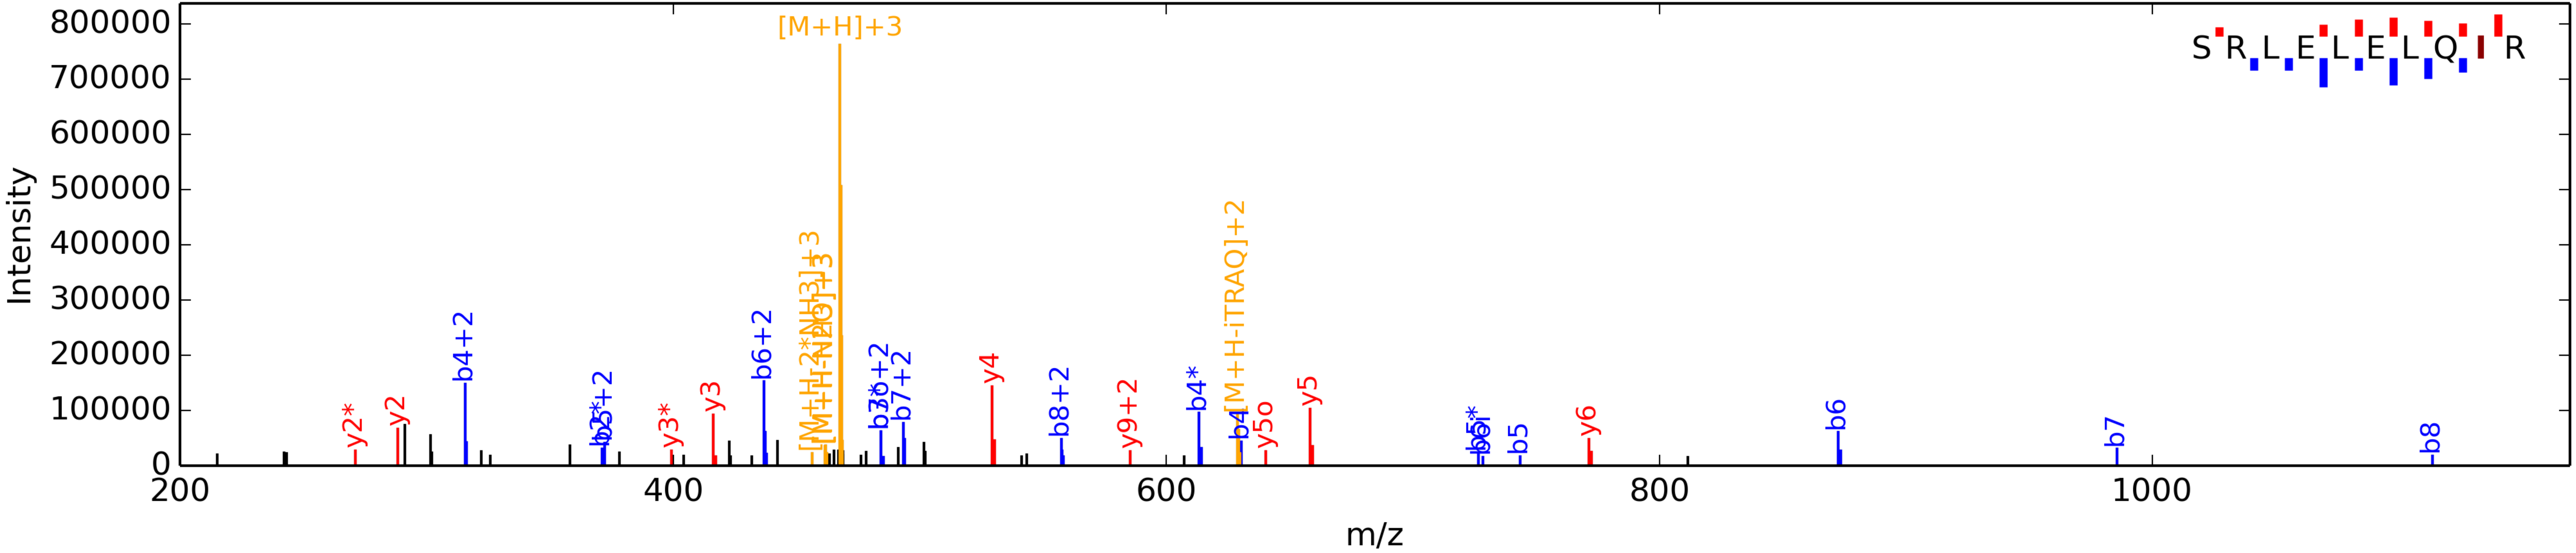

SSAEVIAQSR 144.10207@S1, 2+  
m= 1190.6377, matched intensity=77.4%, largest gap=0, sum gaps=0, gap at S9=0  
CompRef\_2B\_P5-29\_P5-61\_P6-34\_P6-38\_W\_BI\_20130503\_H-JQ\_f15, scan:6108

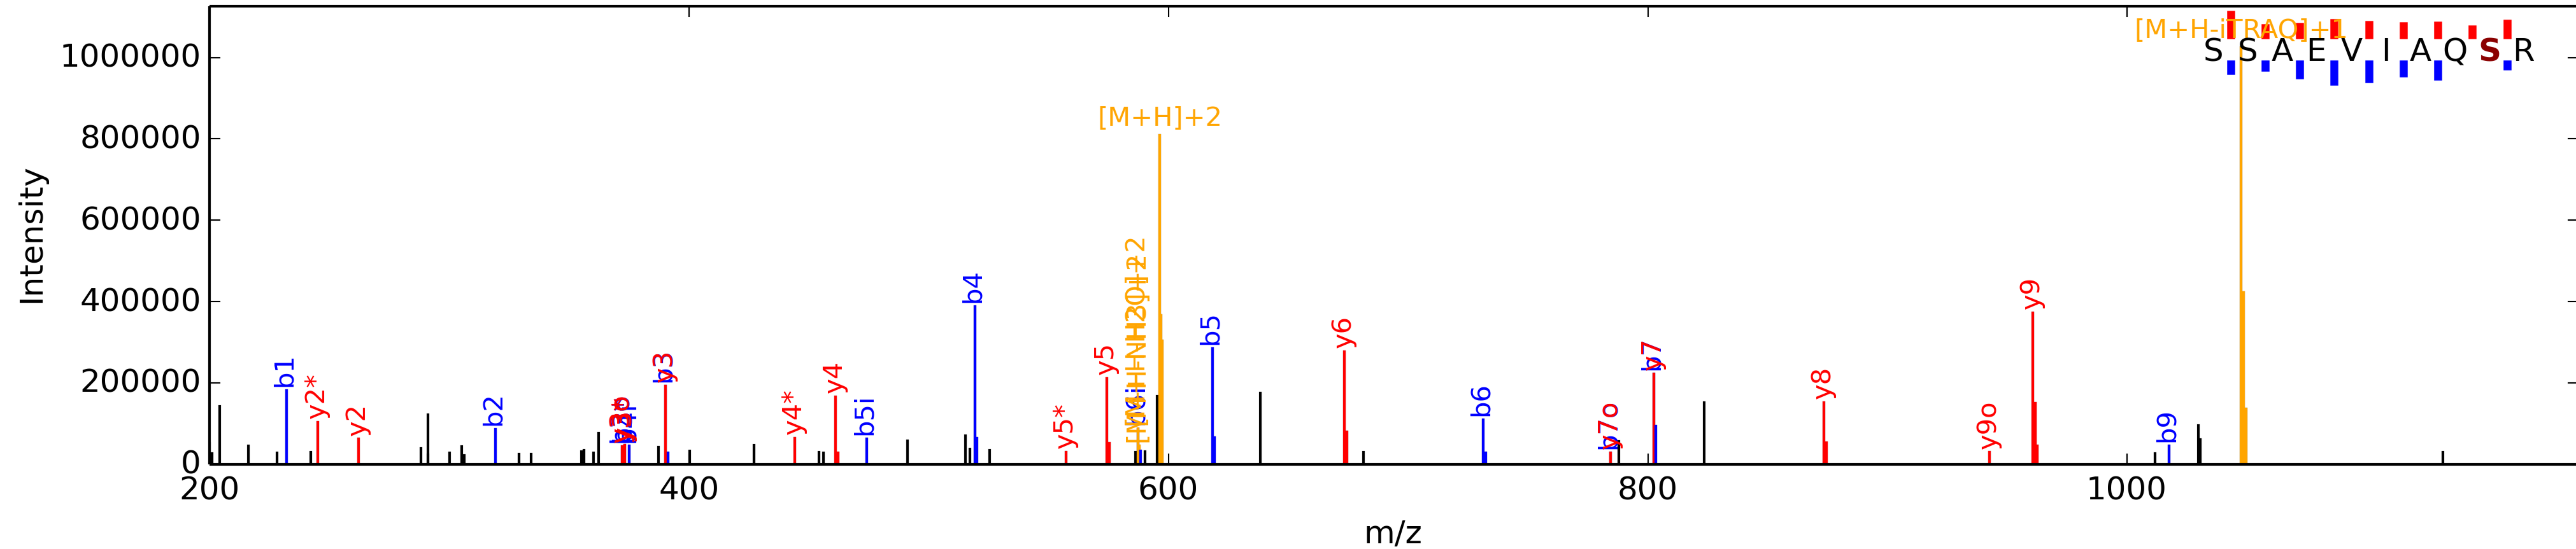





SSFYSLTSSNVSK 144.10207@K13,144.10207@S1, 2+  
m= 1693.8767, matched intensity=66.8%, largest gap=0, sum gaps=0, gap at V11=0  
TCGA\_CompRef\_W\_PNNL\_B2S7\_f04, scan:7049

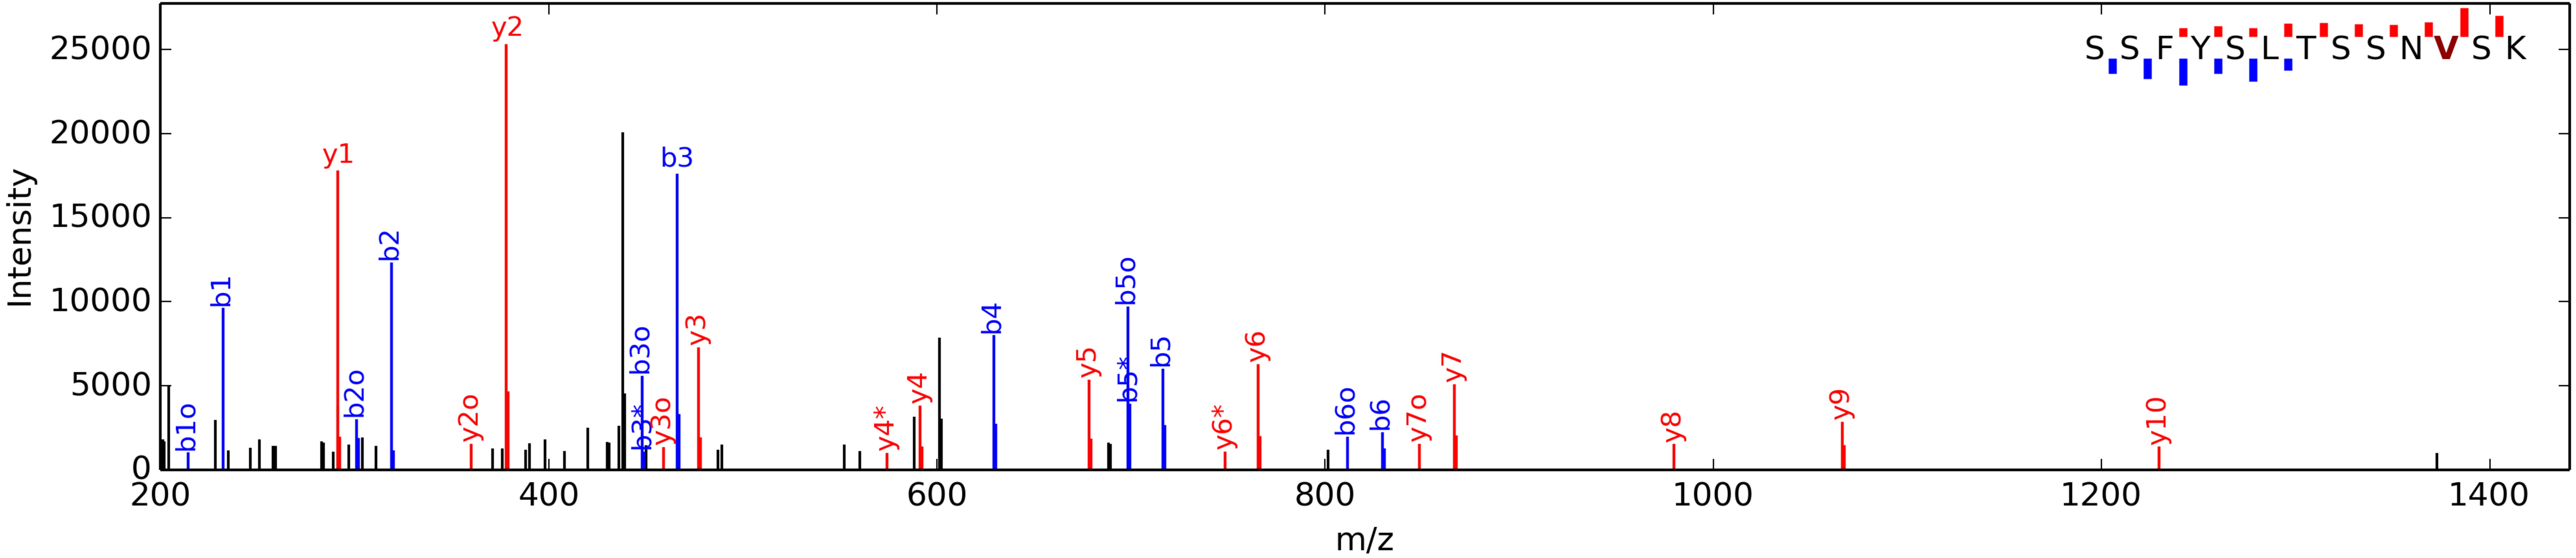

SSGIWENGGPTPATPESFSK 144.10207@K21,144.10207@S1, 3+  
m= 2393.1743, matched intensity=66.9%, largest gap=1, sum gaps=2, gap at G9=0  
H20130119\_PM\_CompRef\_BC1\_proteome\_fxn05, scan:24521

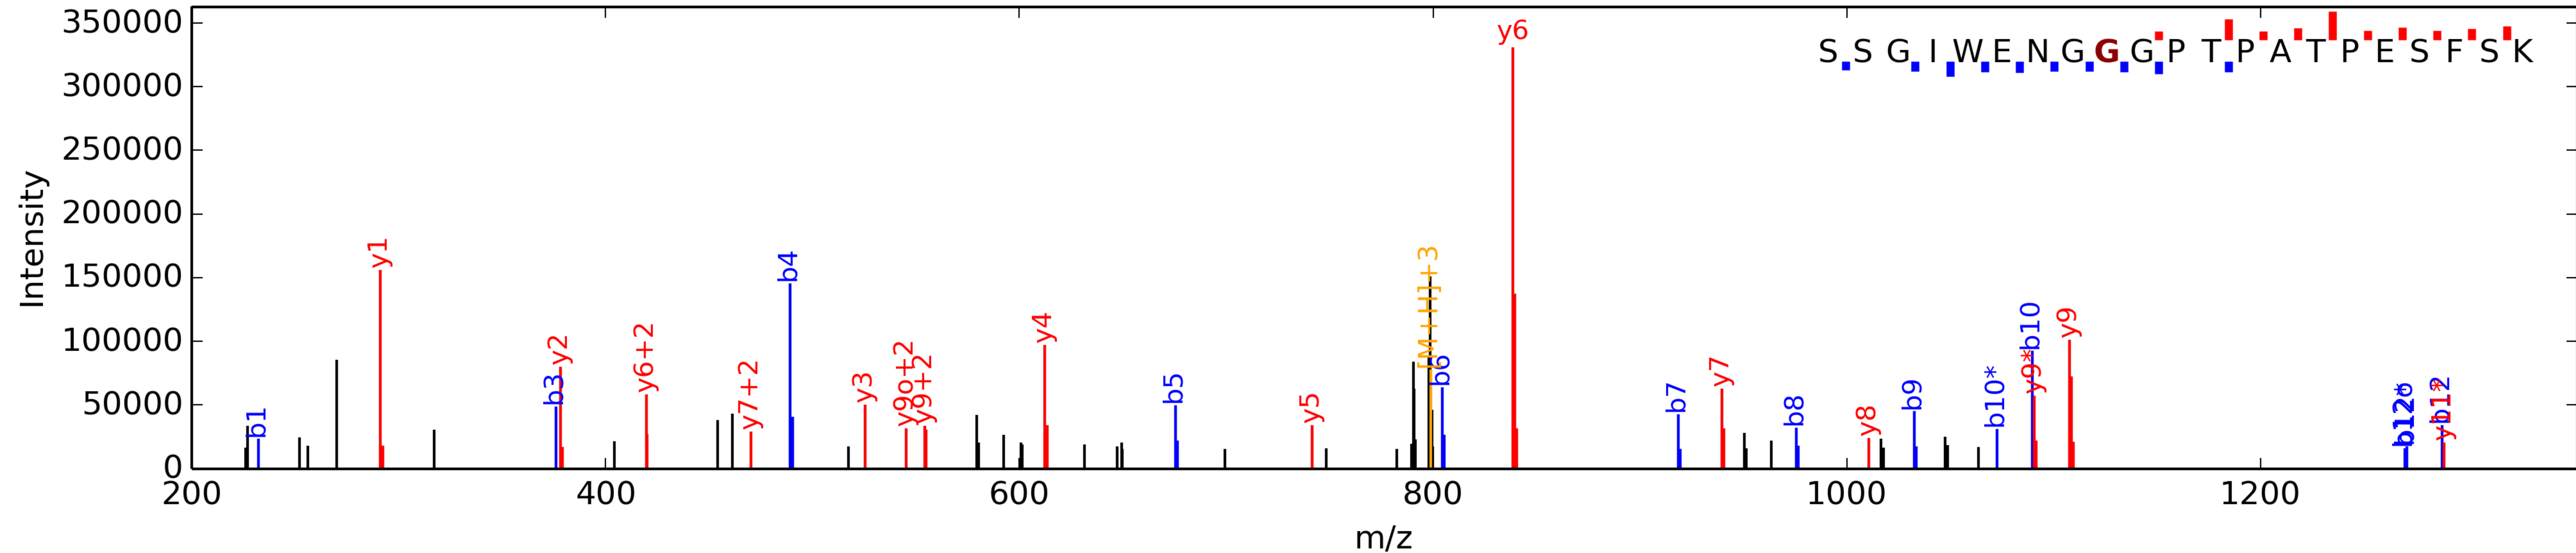



SSHSQDLDFDDVGTFASGPPK 144.10207@K21,144.10207@S1, 3+  
m= 2492.2427, matched intensity=85.3%, largest gap=2, sum gaps=2, gap at H3=2  
cptac\_p32p33\_global\_itraq4\_trypticpep\_fraction\_22, scan:11184

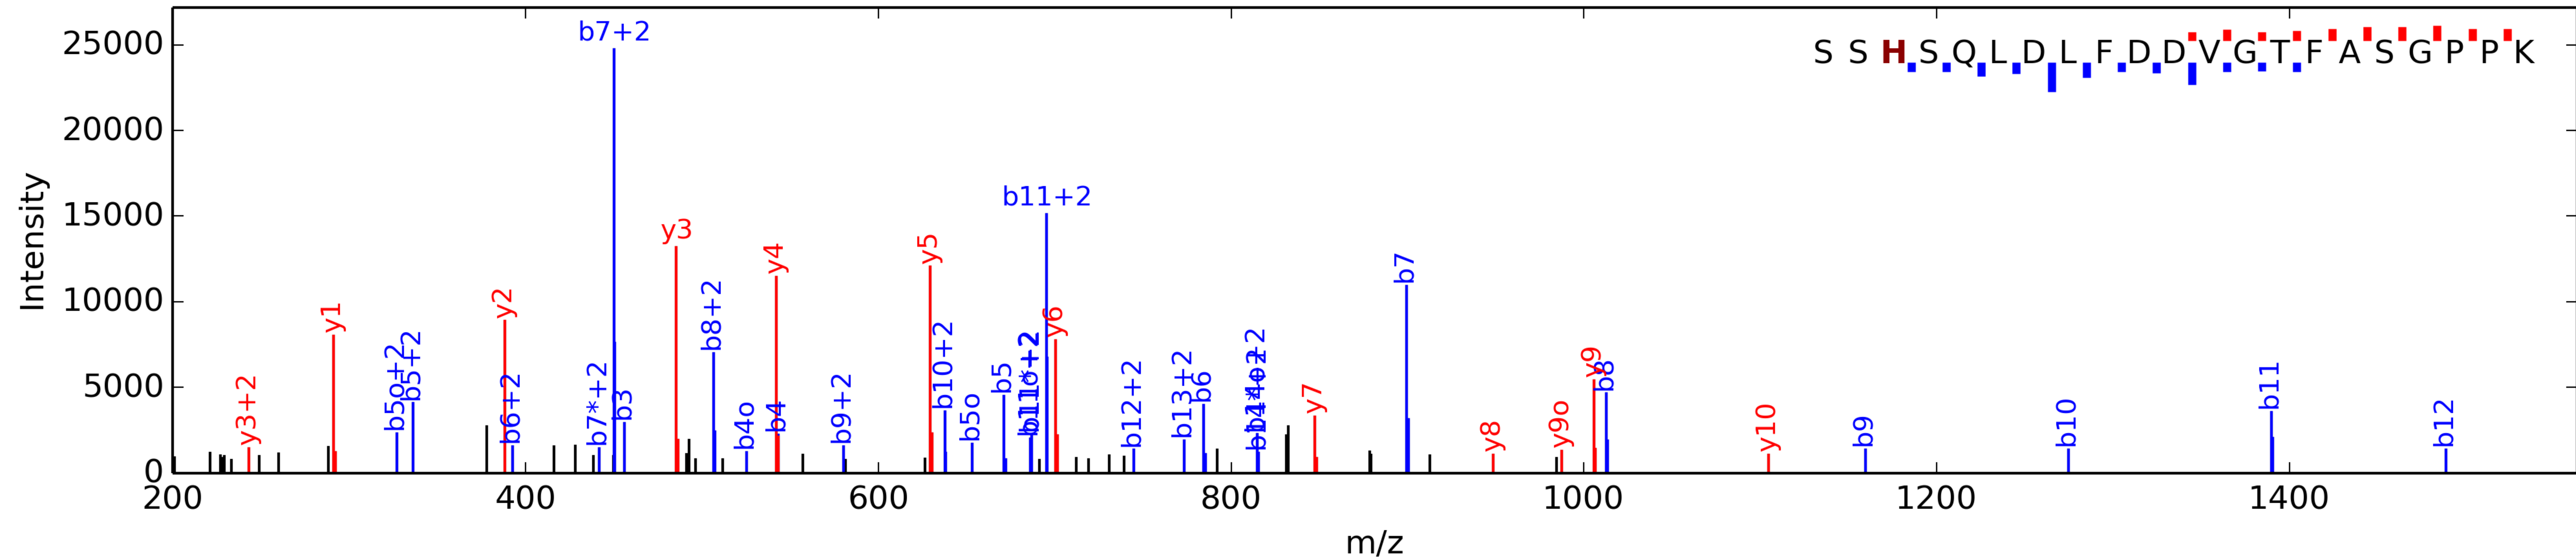

SSKPSDMSVQVCGYISK 57.02200@C12,144.10207@K3,144.10207@K17,144.10207@S1, 3+  
 m= 2304.1825, matched intensity=87.0%, largest gap=2, sum gaps=3, gap at S1=0  
 CompRef\_2B\_P5-29\_P5-61\_P6-34\_P6-38\_W\_BI\_20130503\_H-JQ\_f10, scan:17519

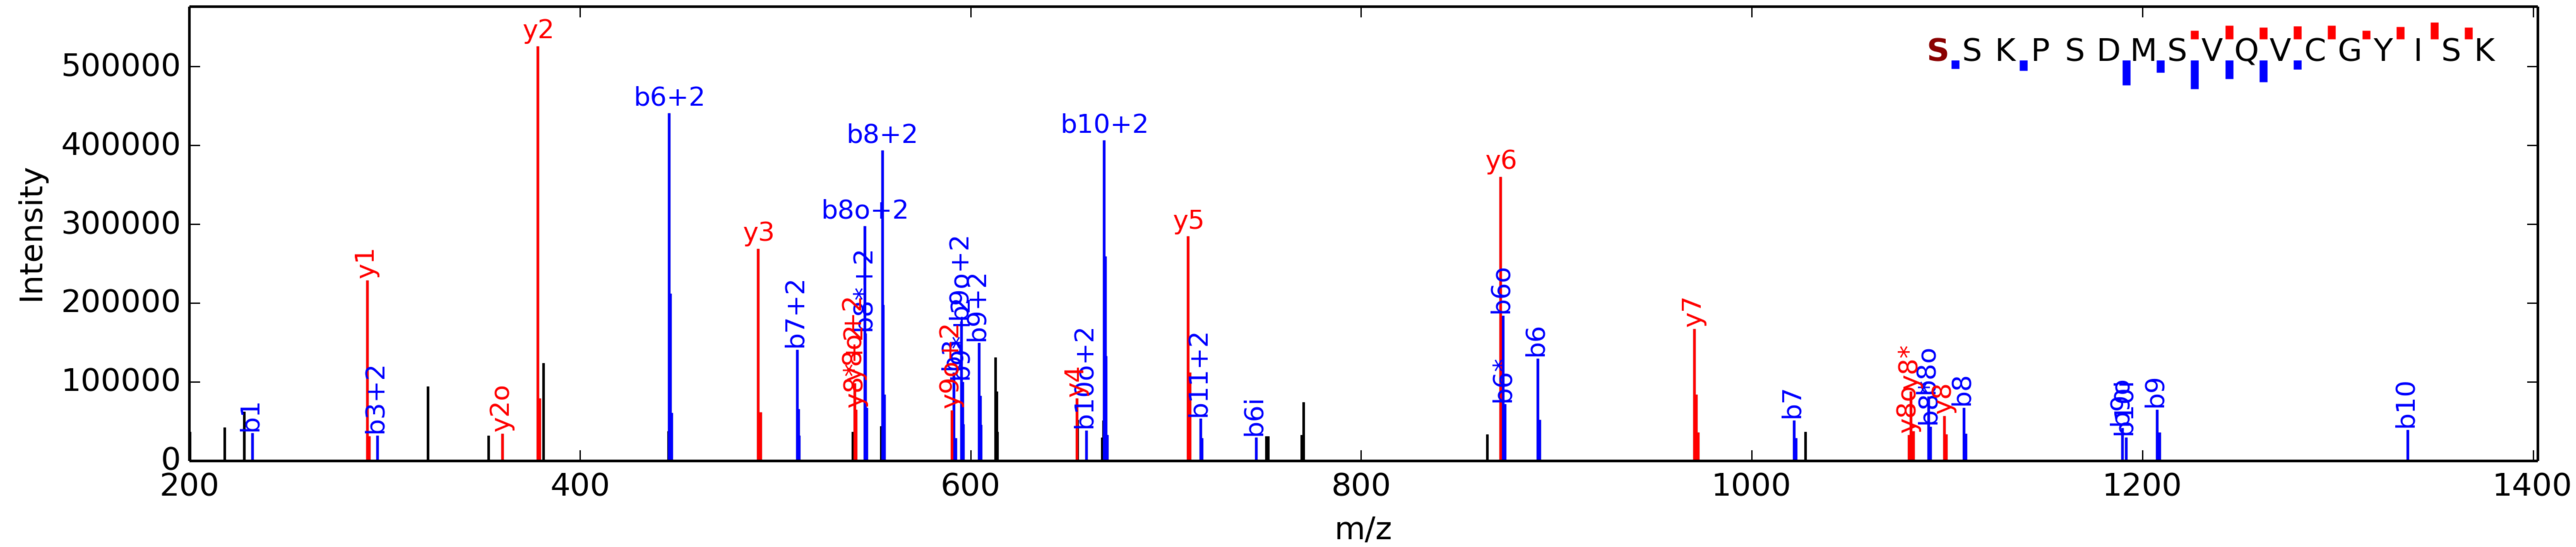

SSLVIPSISK 144.10207@K10,144.10207@S1, 3+  
m= 1317.8112, matched intensity=63.6%, largest gap=0, sum gaps=0, gap at I5=0  
CompRef\_2A\_P5-29\_P5-61\_P6-34\_P6-38\_W\_BI\_20130502\_H-JQ\_f17, scan:22034

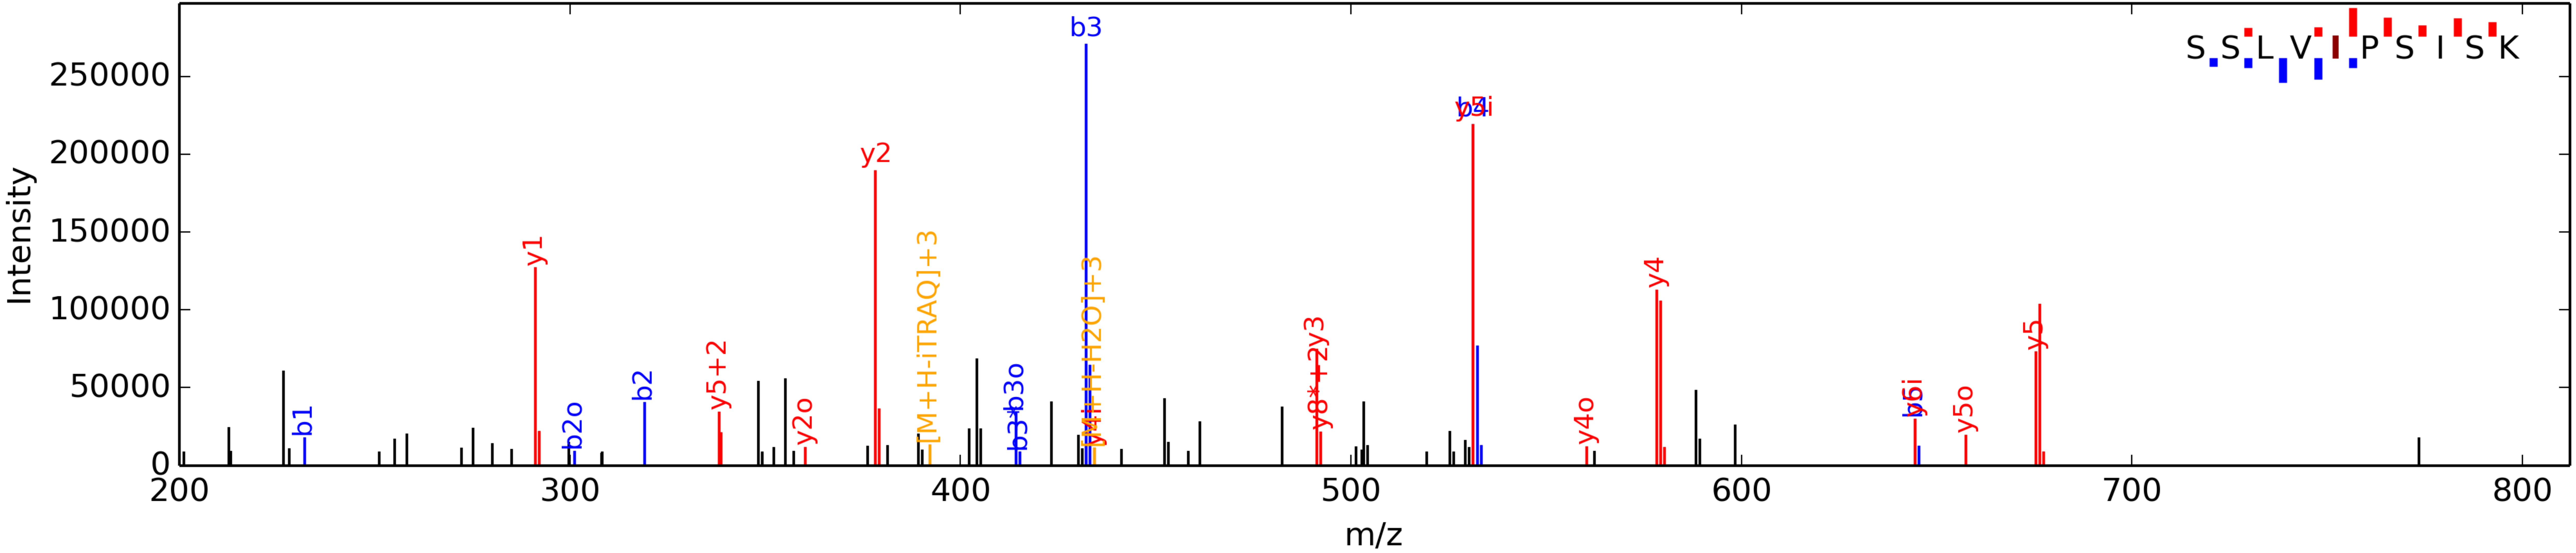

Supplement: 10.1074_M115.056226_mcp.M115.056226-10.pdf [file 10.1074_M115.056226_mcp.M115.056226-10.pdf]
