# Supplementary material
Source: PubMed Central journal article supplement (PMC4813688)

AEGAQNQGR 2+  
m= 929.4315, matched intensity=72.7%, largest gap=1, sum gaps=1  
W16\_2, scan:2369

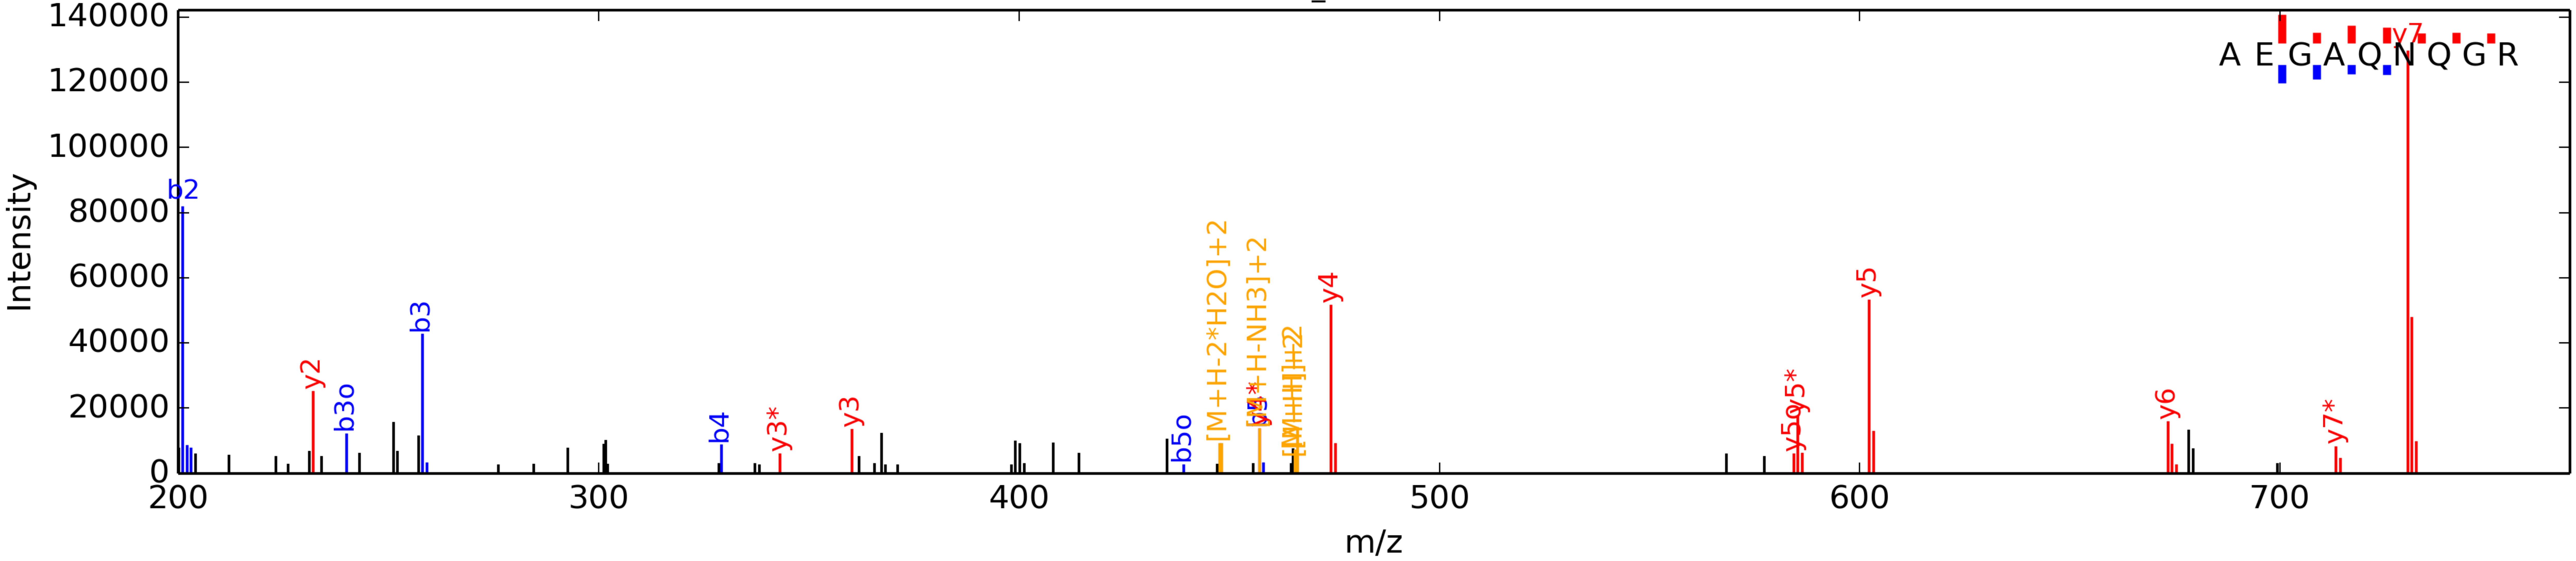

DILTNLQSDLLSSSCLK 57.02200@C15, 2+  
m= 1905.9723, matched intensity=62.1%, largest gap=1, sum gaps=1  
W16\_1, scan:58852

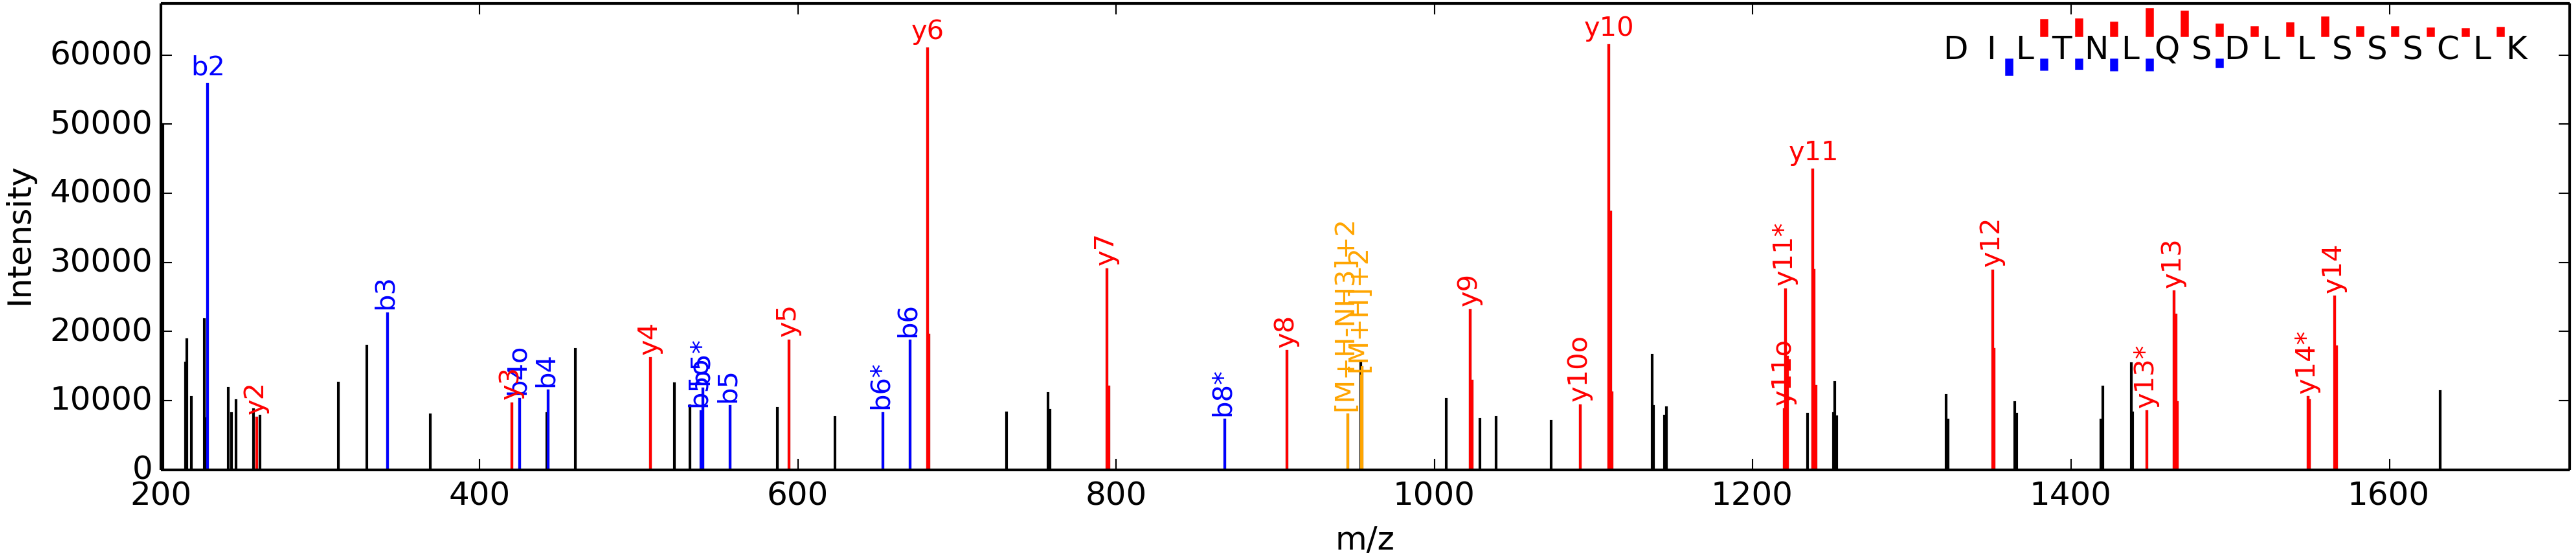

EGPRPVLSGPGAGK 2+  
m= 1506.8154, matched intensity=80.9%, largest gap=1, sum gaps=3  
W2\_1, scan:15650

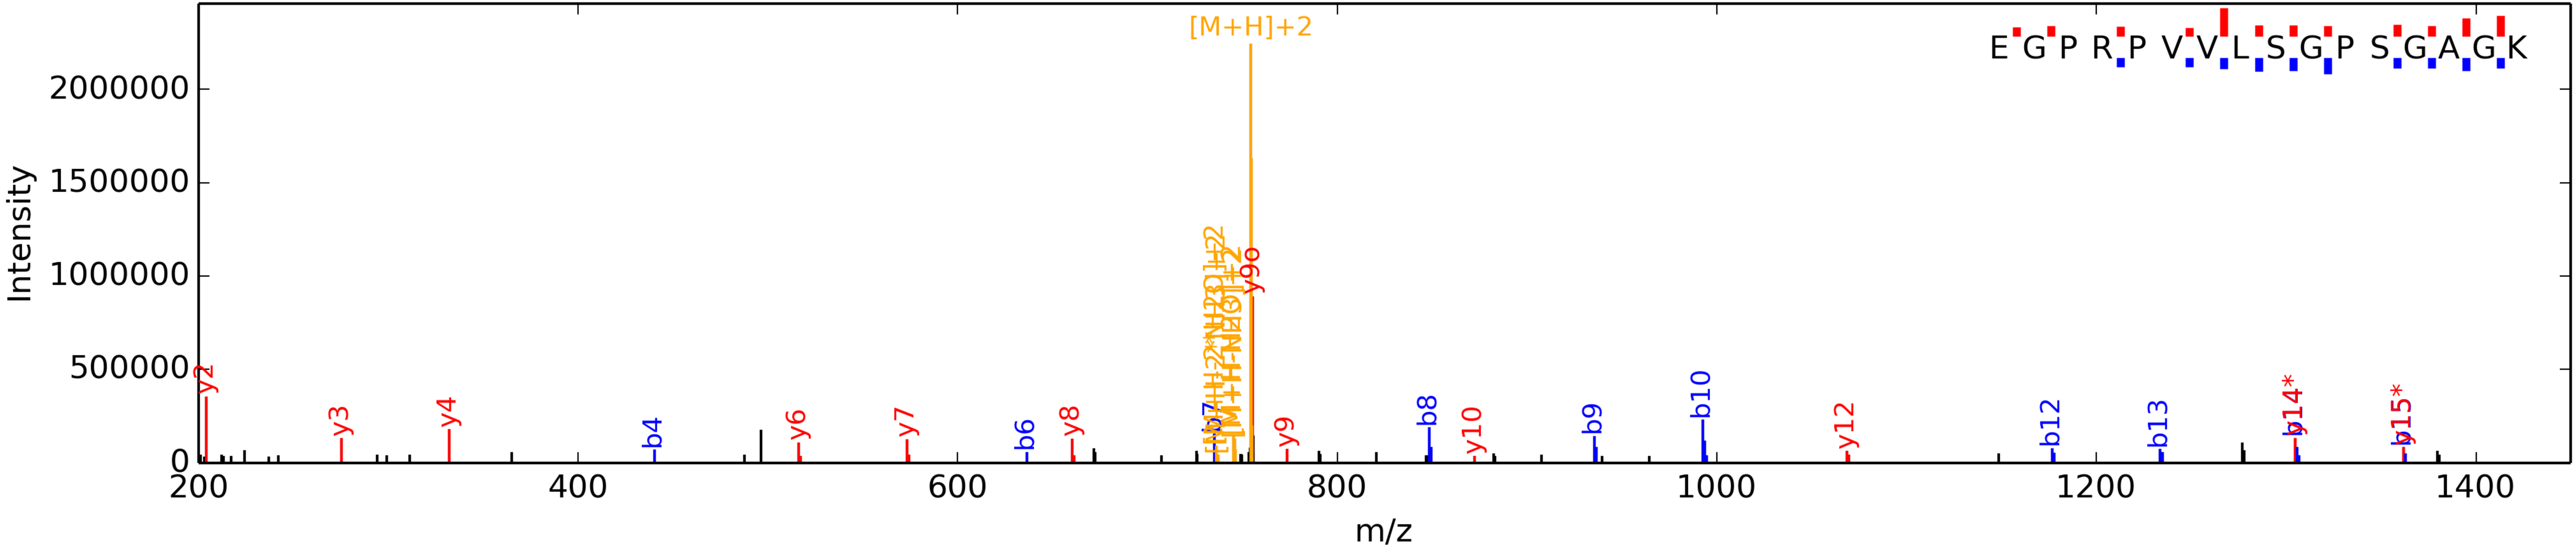



FTNMLGQPVFSLGSTALDLFK 2+  
m= 2285.1766, matched intensity=78.4%, largest gap=1, sum gaps=2  
W16\_4, scan:67054

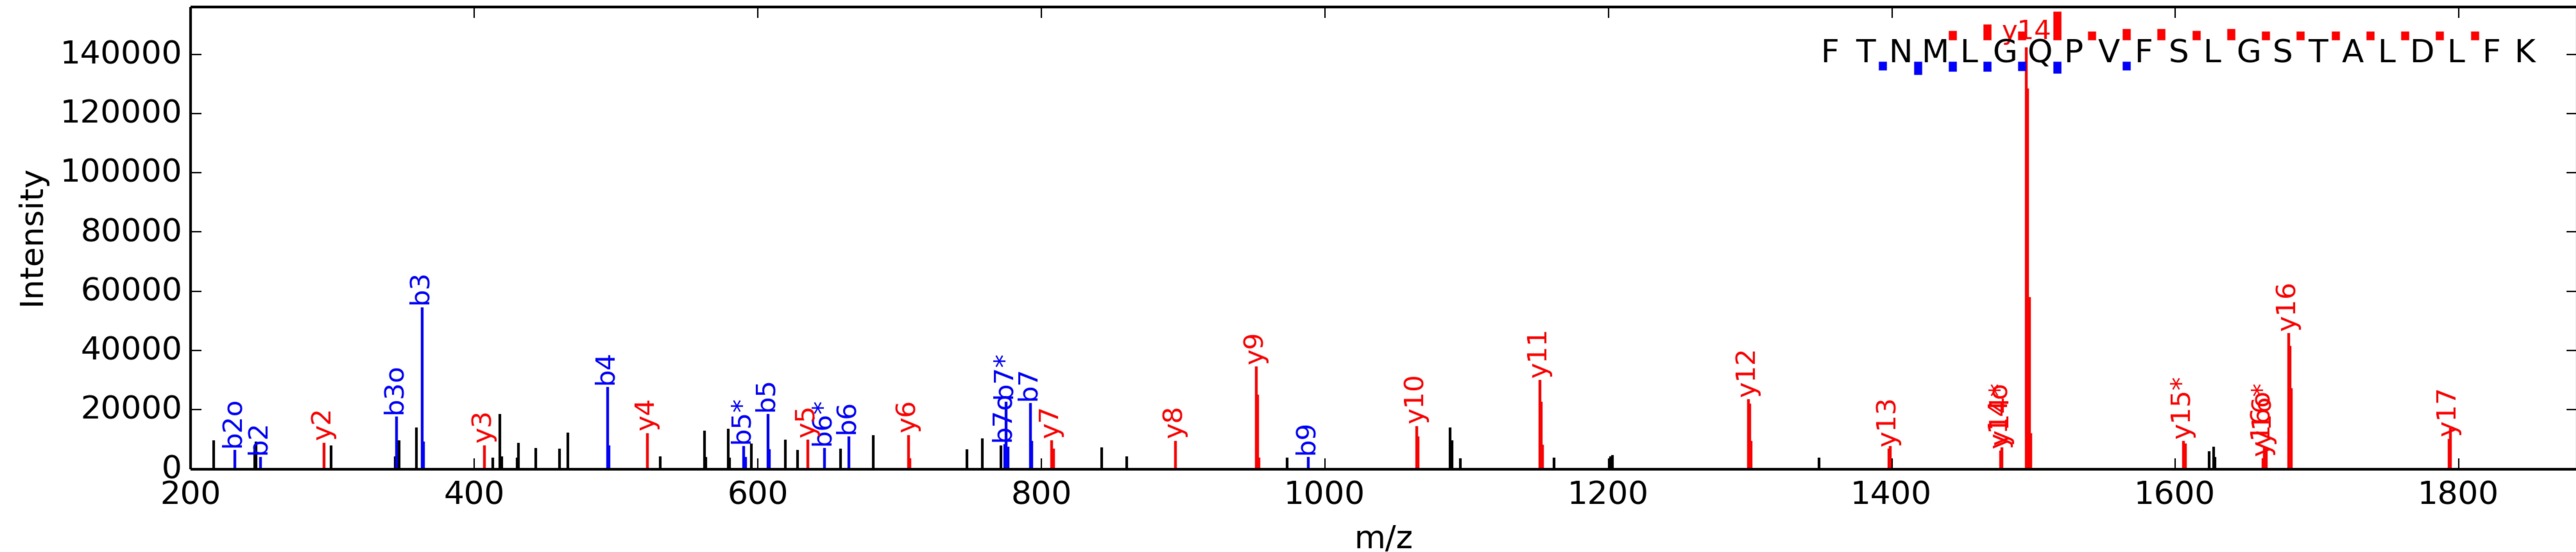

IQQQQPPPGEQK 2+  
m= 1376.7048, matched intensity=63.8%, largest gap=1, sum gaps=1  
S\_bRP-13, scan:1090

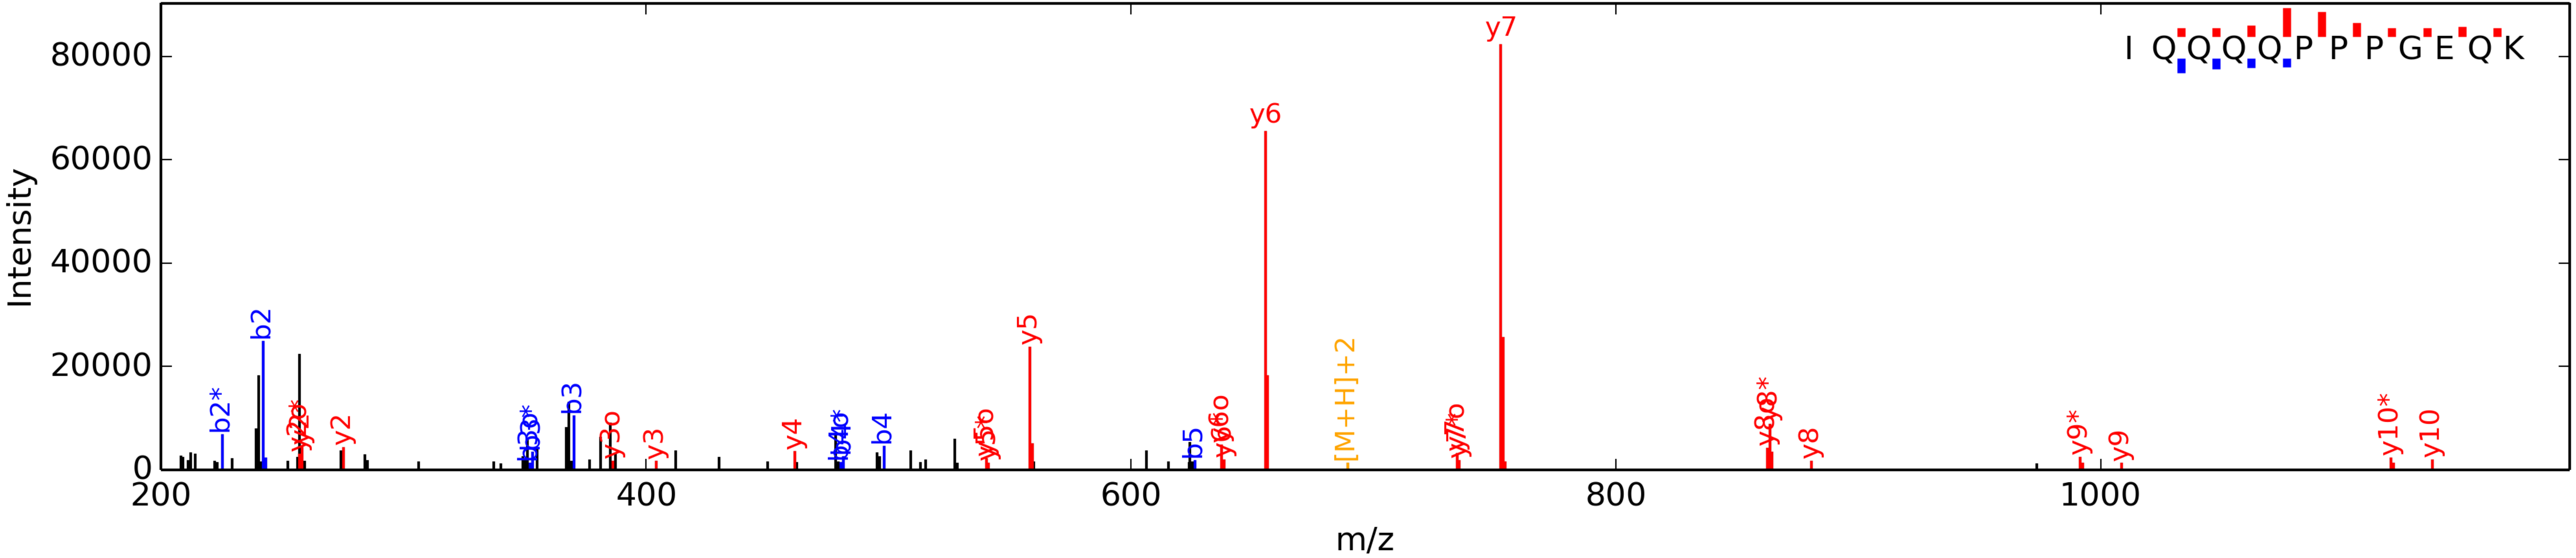

NAAAAAALQAK 2+  
m= 998.5509, matched intensity=55.4%, largest gap=0, sum gaps=0  
S\_bRP-23, scan:5879

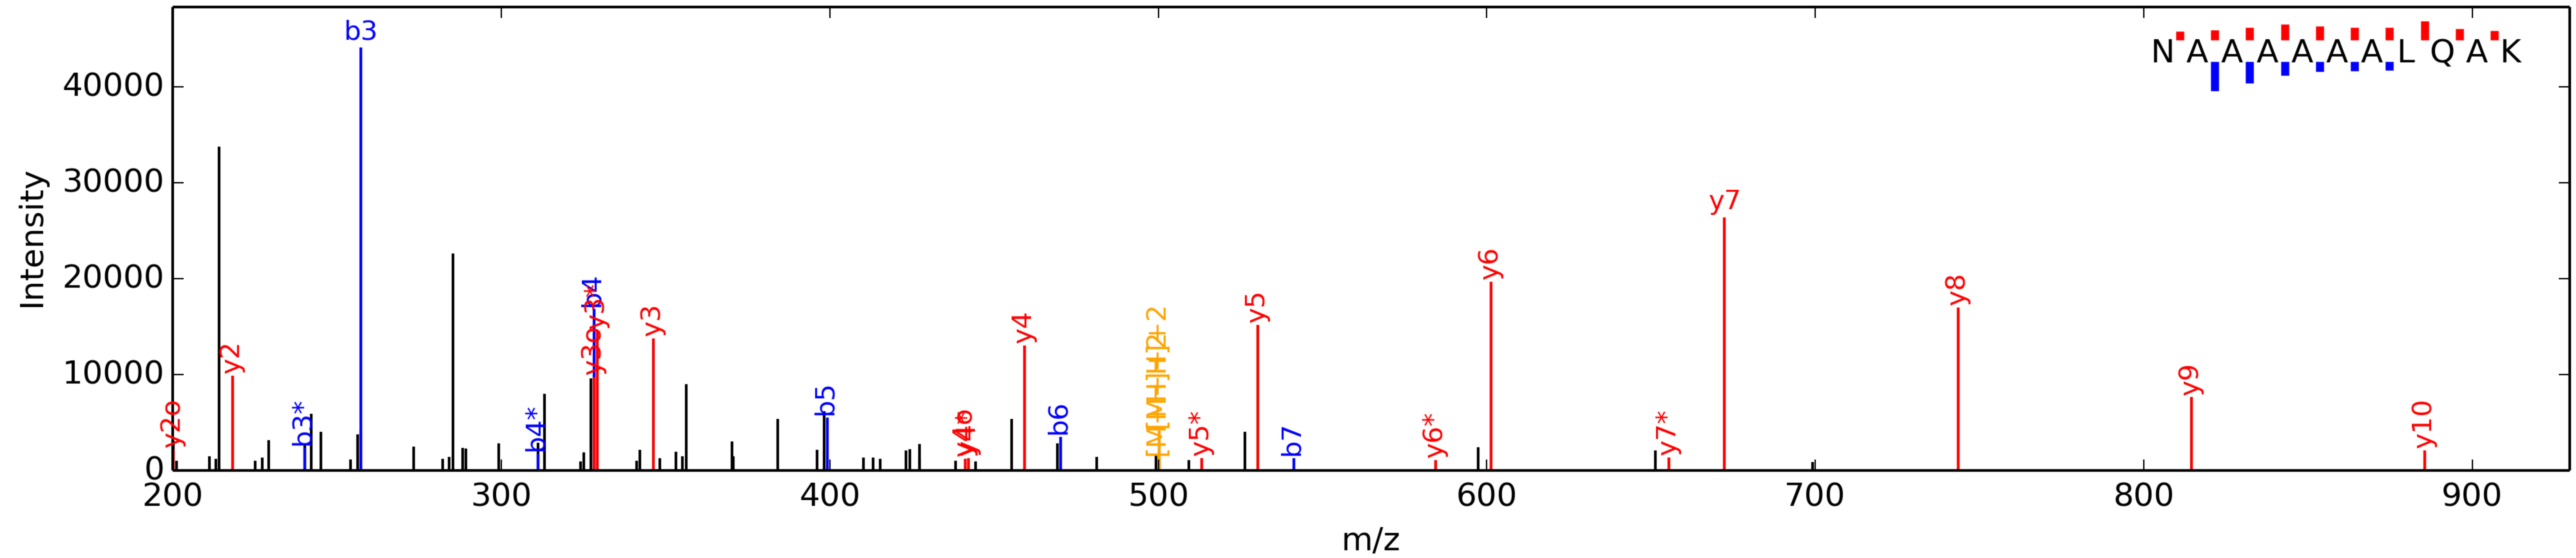

RAVILGATIENS R 2+  
m= 1398.7943, matched intensity=51.2%, largest gap=2, sum gaps=3  
W16\_3, scan:12775

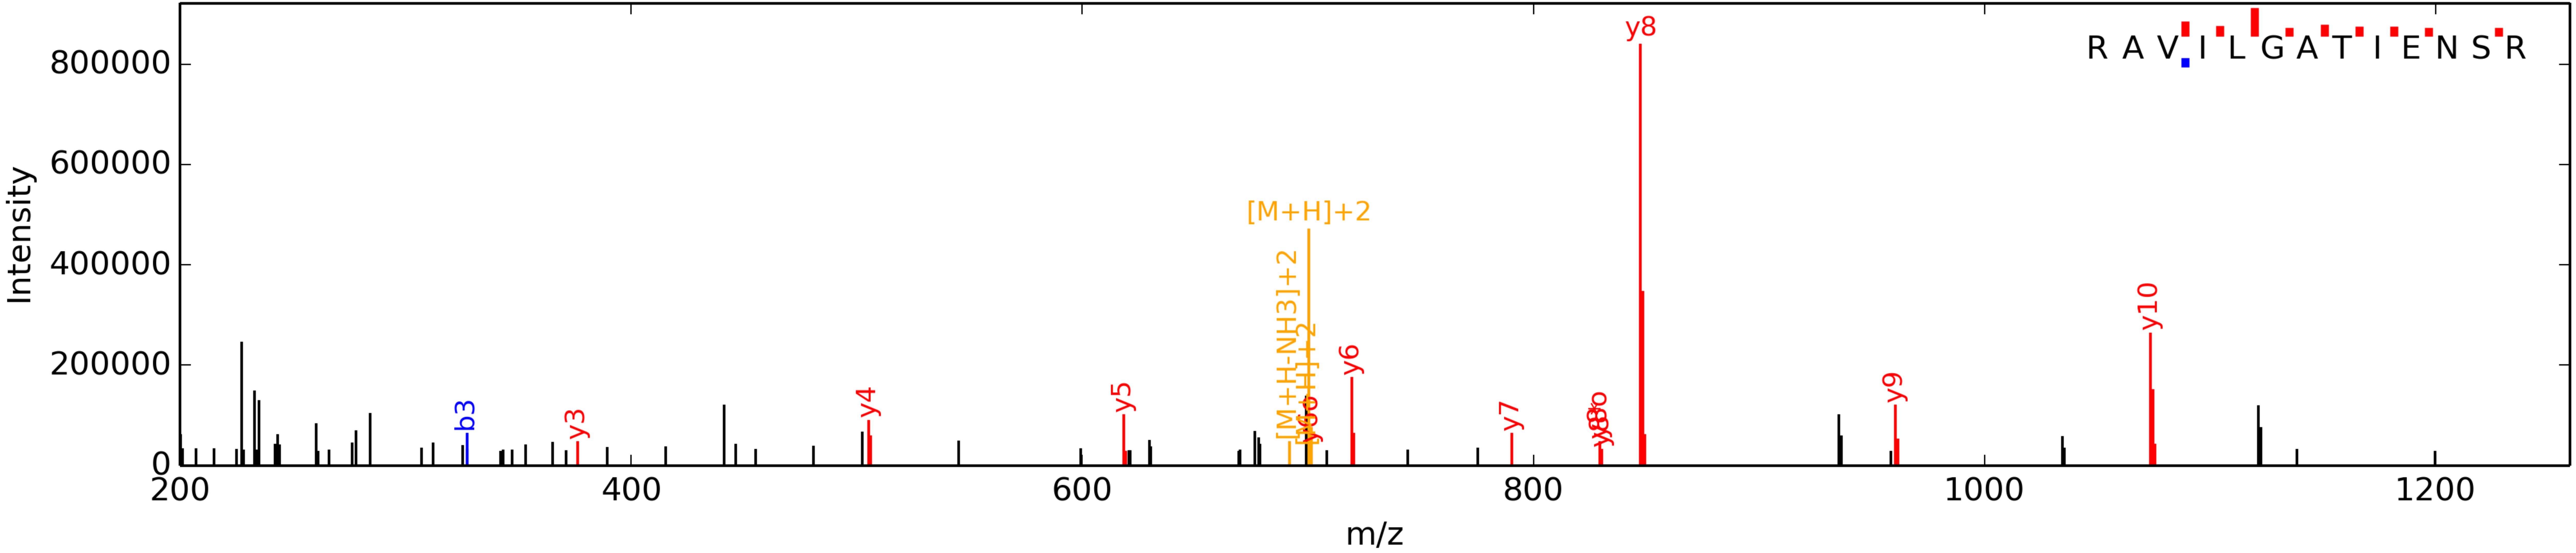



RPLGVRPSQGGEAPR 3+

m= 1575.8594, matched intensity=65.5%, largest gap=1, sum gaps=1

S\_bRP-21, scan:1573

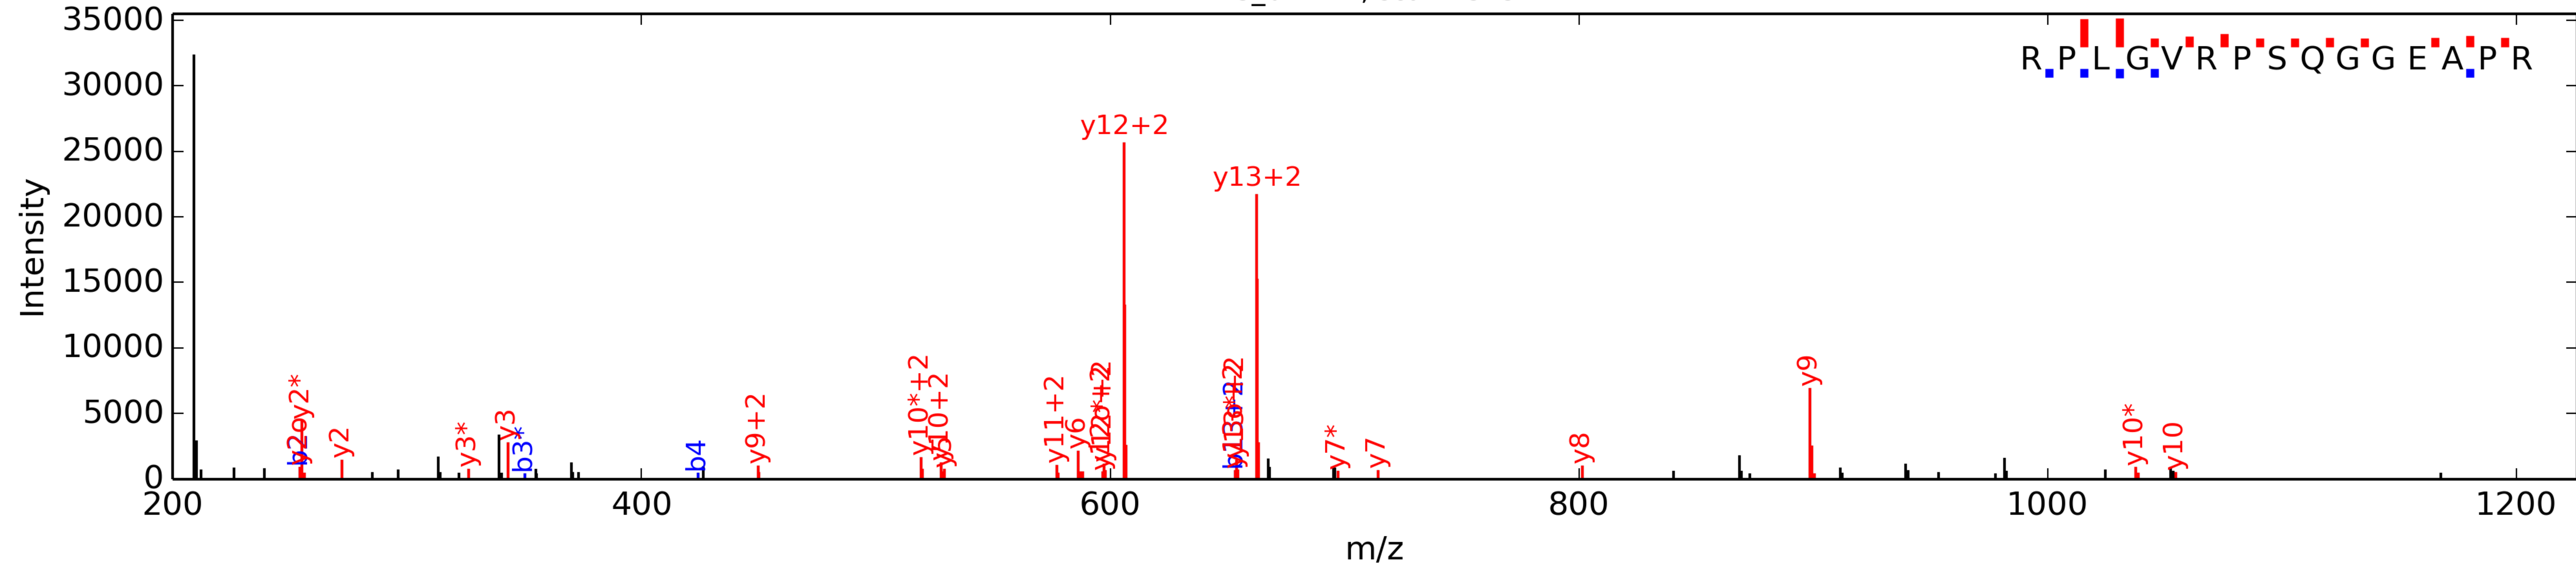



SHMMDVQQGSTQDSAİK 15.99492@M3, 2+  
m= 1877.8248, matched intensity=59.9%, largest gap=1, sum gaps=1  
W2\_3, scan:11079

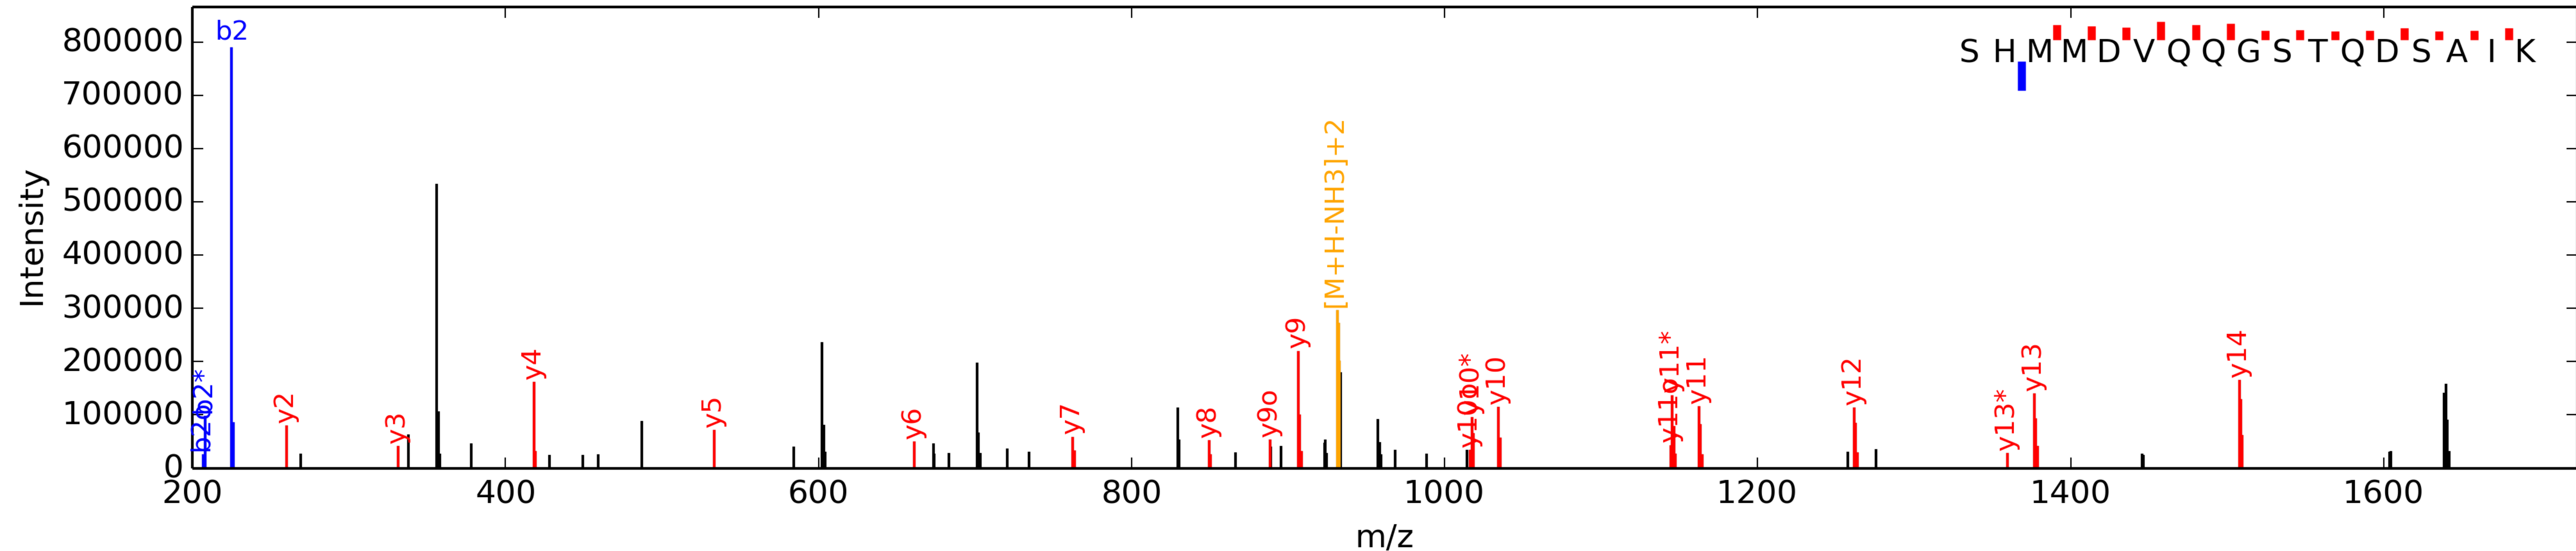

STGGAAVPR 2+  
m= 814.4297, matched intensity=56.3%, largest gap=2, sum gaps=2  
W2\_5, scan:3395

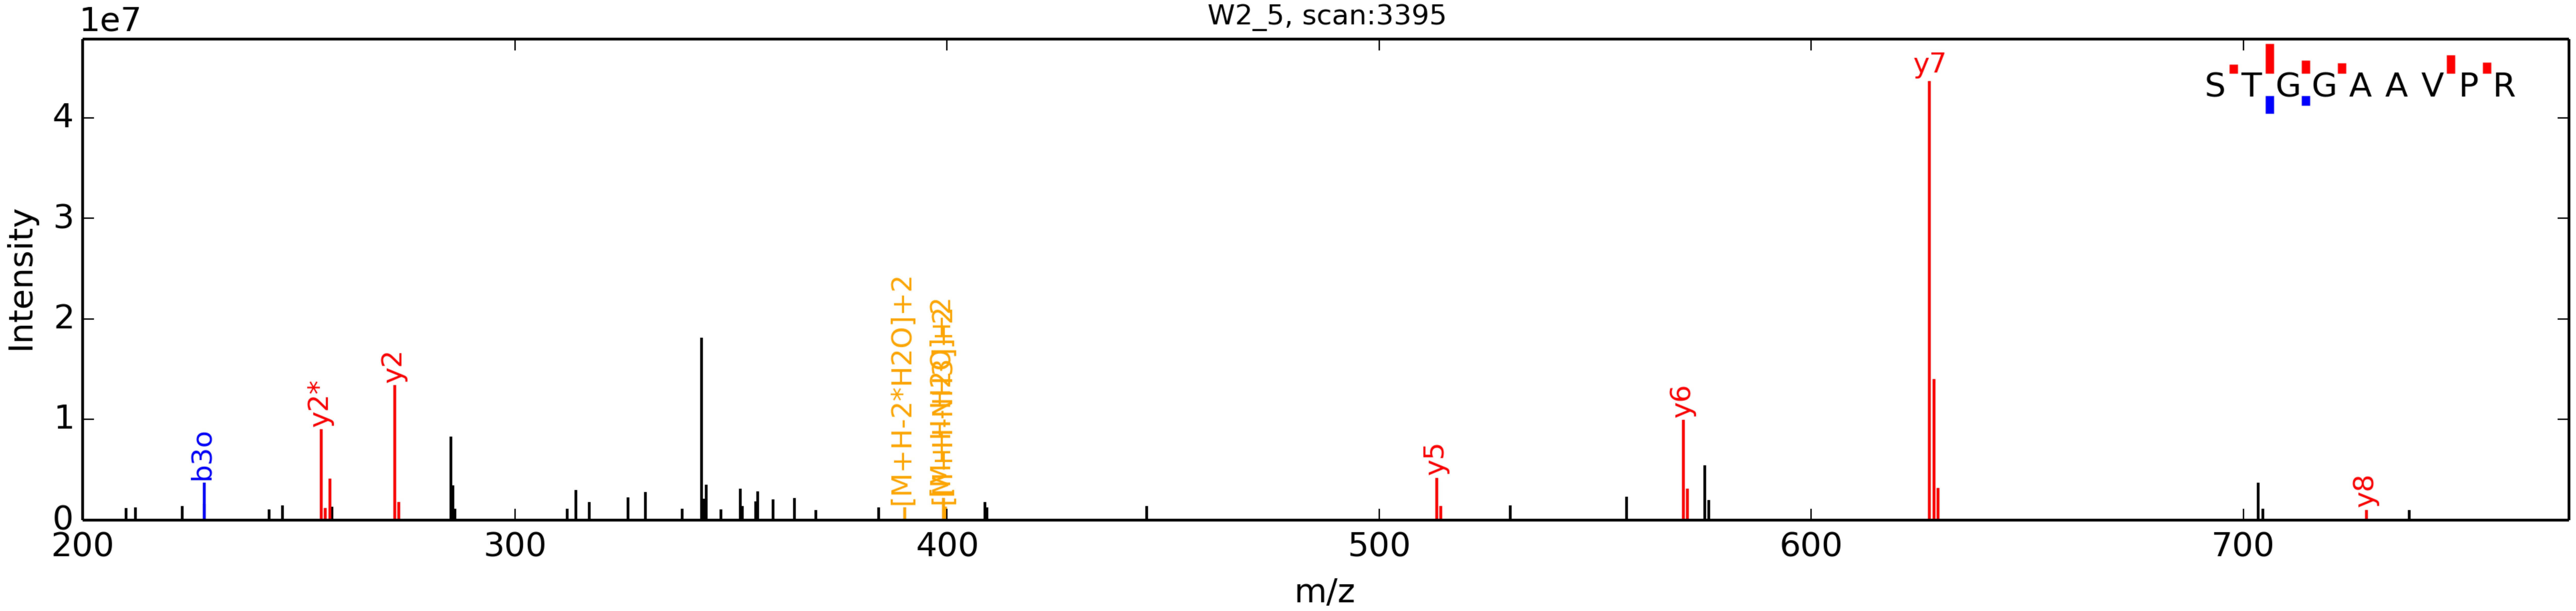

TIQFVDWCPTGFKR 57.02200@C8, 3+  
m= 1753.8615, matched intensity=64.0%, largest gap=2, sum gaps=2  
W2\_2, scan:37179

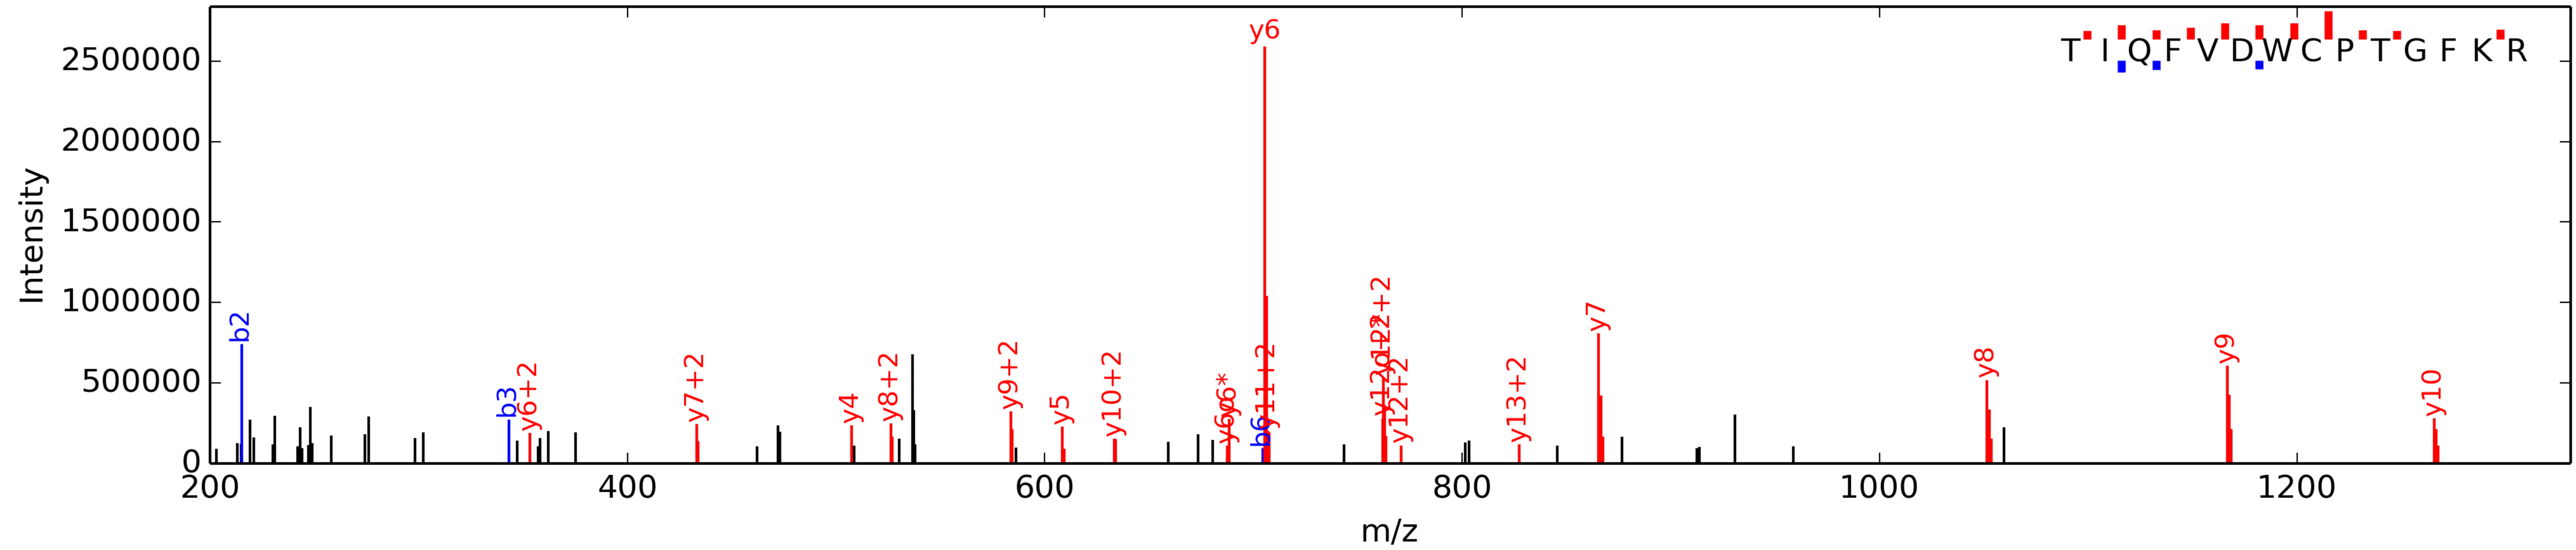



TVQTAAANAASTAASSAAQNAFK 2+  
m= 2151.0556, matched intensity=79.4%, largest gap=1, sum gaps=2  
W2\_3, scan:36060

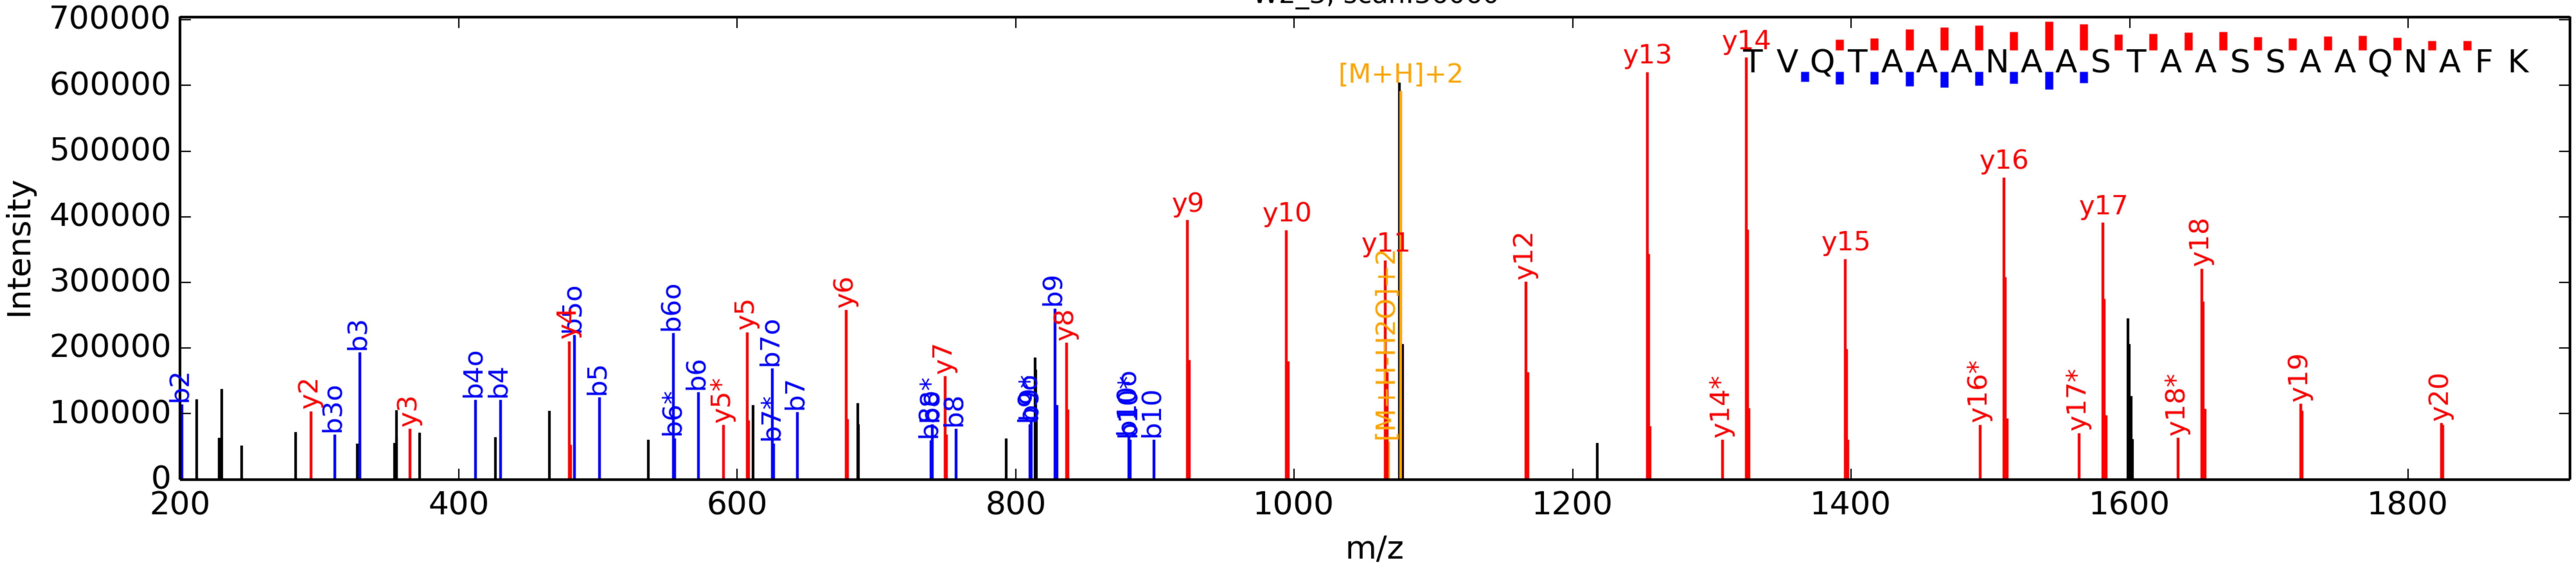

Supplement: 10.1074_M115.056226_mcp.M115.056226-15.pdf [file 10.1074_M115.056226_mcp.M115.056226-15.pdf]
