# Supplementary material
Source: PubMed Central journal article supplement (PMC4813688)
Supplement: 10.1074_M115.056226_mcp.M115.056226-18.pdf [file 10.1074_M115.056226_mcp.M115.056226-18.pdf]

**A**

**Novel Junction Peptides with 2 known exons**  
**Predicted by RNA Sequencing, Identified by MS/MS**

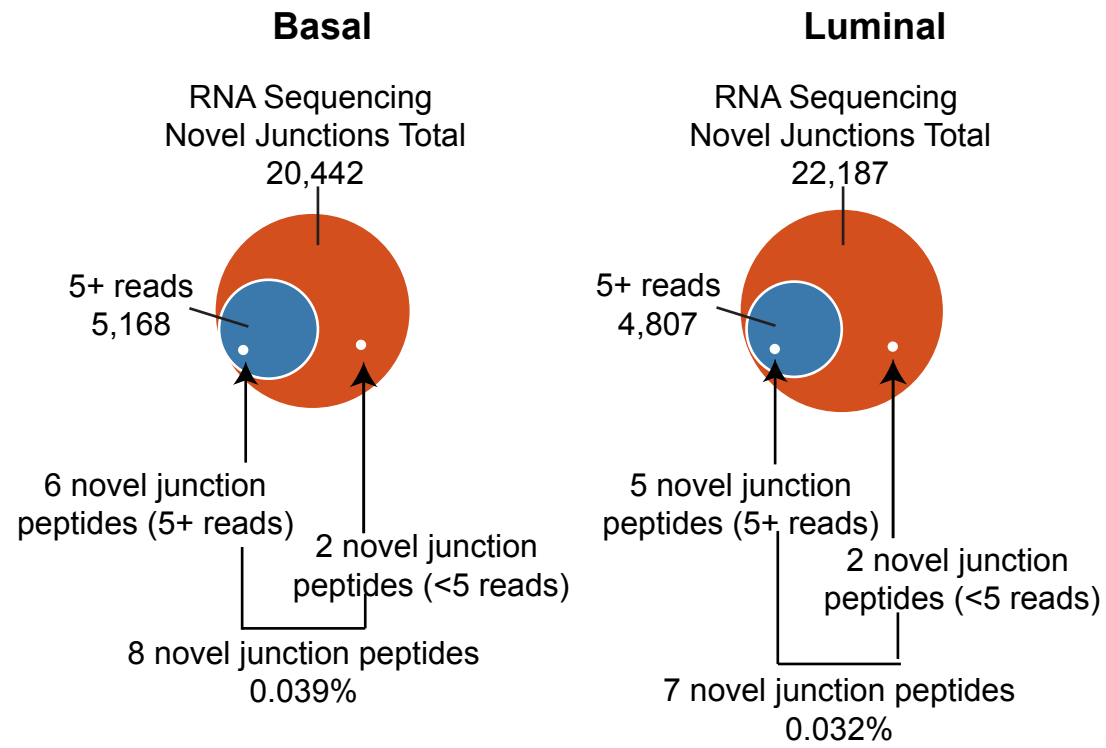**B**

**Novel Junction Peptides with 2 known exons**  
**Predicted by RNA Sequencing, Identified by MS/MS**

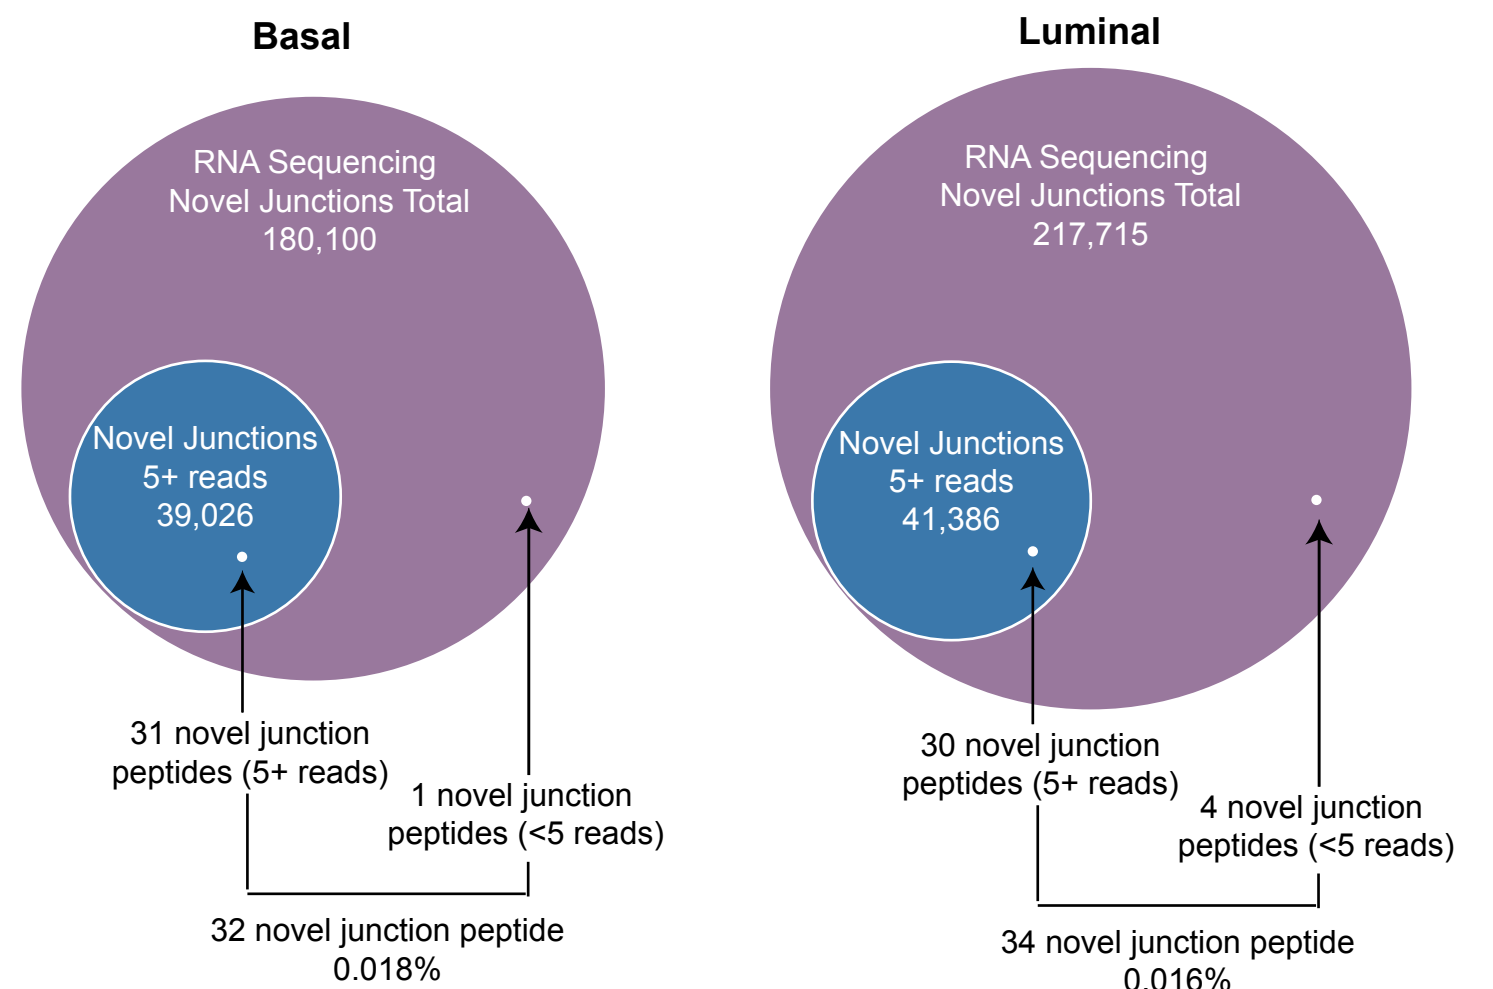**C**

**Novel Junction Peptides with 0 known exons**  
**Predicted by RNA Sequencing, Identified by MS/MS**

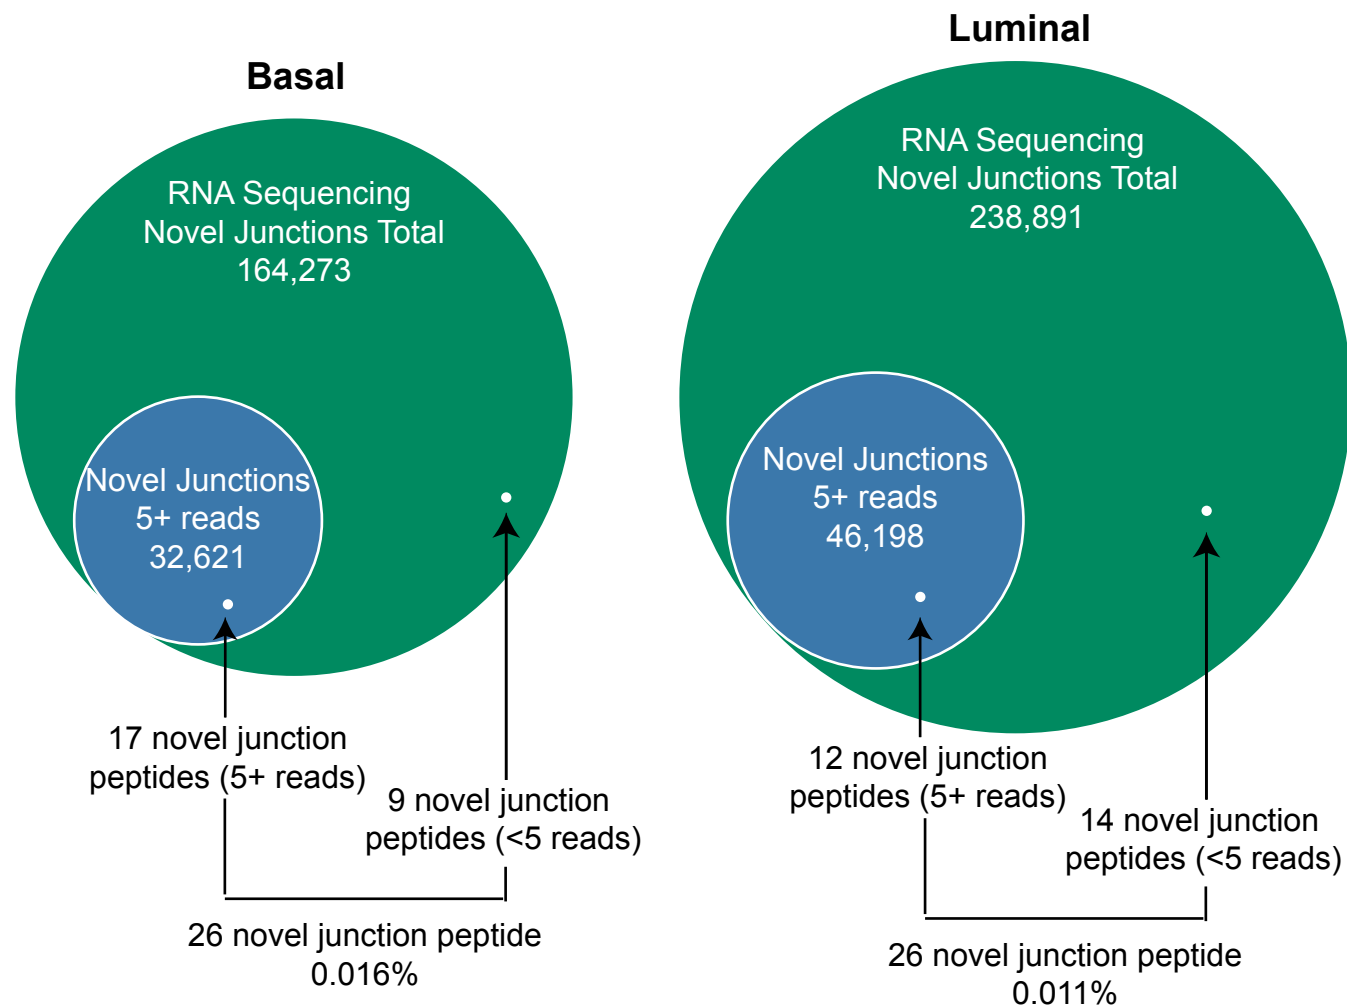

**Supplementary Figure 8. Novel junction peptide detection in each splice junction class.** Proportion of predicted junctions based on RNA sequencing (all junctions, red/purple/green; junctions 5+ reads blue) which were identified by MS/MS proteomics for luminal and basal breast tumors from splicing between (A) two known exons, (B) one known exon and a novel region and (C) no known exons (2 novel coding regions).
